# Supplementary material
Source: PubMed Central journal article supplement (PMC3142352)
Supplement: NIHMS298984-supplement-SuppInfo-File.pdf [file NIHMS298984-supplement-SuppInfo-File.pdf]

## Supporting Information

# Chemoselective and Enantioselective Oxidation of Indoles Employing Aspartyl Peptide Catalysts

*Filip Kolundzic<sup>√</sup>, Mohammad N. Noshi<sup>≠</sup>, Meiliana Tjandra<sup>≠</sup>,  
Mohammad Movassaghi<sup>≠</sup>, and Scott J. Miller<sup>√</sup>*

Department of Chemistry, Yale University, P.O. Box 208107, New Haven, CT 06520-8107 and  
Department of Chemistry, Massachusetts Institute of Technology, Cambridge, MA 02139-4307.

**AUTHOR EMAIL ADDRESS:** [movassag@mit.edu](mailto:movassag@mit.edu) and [scott.miller@yale.edu](mailto:scott.miller@yale.edu)

**RECEIVED DATE:** (to be automatically inserted after your manuscript is accepted if  
required according to the journal that you are submitting your paper to)

CORRESPONDING AUTHOR FOOTNOTE

<sup>≠</sup> Massachusetts Institute of Technology

<sup>√</sup> Yale University.

## Table of Contents

|    |                                                                                         |     |
|----|-----------------------------------------------------------------------------------------|-----|
| A. | General.....                                                                            | 3   |
| B. | Preparation of 2-ArylindoleDerivatives.....                                             | 4   |
| C. | Structure–Enantioselectivity Relationships for Peptide Catalyzed Indole Oxidation.....  | 17  |
| D. | Peptide Sequence Optimization for Enantioselective Indole Oxidation. ....               | 18  |
| E. | Preparation of Peptides 22 and <i>ent</i> -22. ....                                     | 19  |
| F. | General Procedure for the Peptide Catalyzed Oxidation of 2,3-Disubstituted Indoles..... | 21  |
| G. | Analytical Data for Indole Oxidation Products.....                                      | 22  |
| H. | X-Ray Structure of the Compound 41c and Proof of Absolute Stereochemistry.....          | 32  |
| I. | Procedure for the Stereospecific Rearrangement of 3-Hydroxy-indolenines.....            | 33  |
| J. | NMR Spectra.....                                                                        | 35  |
| K. | X-Ray Diffraction Report for Compound 41c.....                                          | 77  |
| L. | Chromatograms. ....                                                                     | 105 |
| M. | References.....                                                                         | 123 |

## A. General.

$^1\text{H}$  NMR data were collected at 500 MHz or 400 MHz.  $^1\text{H}$  NMR chemical shifts are reported in parts-per-million ( $\delta$ , ppm) relative to tetramethylsilane ( $\delta = 0$  ppm) with residual  $\text{CHCl}_3$  ( $\delta = 7.26$  ppm) as the internal standard.  $^1\text{H}$  NMR spectral data are reported as follows: chemical shift (multiplicity [singlet (s), doublet (d), triplet (t), quartet (q), quintet (p), multiplet (m), broad (br)], coupling constants [Hz], integration). Proton decoupled  $^{13}\text{C}$  NMR spectra were recorded at 126 MHz or 100 MHz.  $^{13}\text{C}$  chemical shifts are reported in parts-per-million ( $\delta$ ) relative to tetramethylsilane ( $\delta = 0$  ppm), with the central line of the  $\text{CDCl}_3$  triplet (77.23 ppm) serving as the internal standard.  $^{19}\text{F}$  spectra were collected at 376 MHz.  $^{19}\text{F}$  NMR chemical shifts are reported in parts-per-million ( $\delta$ ) relative to trichlorofluoromethane ( $\delta = 0$  ppm) using monofluorobenzene as the internal standard ( $\delta = -113.1$  ppm). All NMR data were collected at room temperature (23 °C).

Thin film and attenuated total reflectance (ATR) infrared (IR) spectra of neat samples were recorded on a FT-IR spectrometer; IR data ( $\nu_{\text{max}}$  in  $\text{cm}^{-1}$ ) is reported for diagnostic bands as well as other notable frequencies.

All of the samples were characterized by ultra high performance liquid chromatography-mass spectrometry (UPLC-MS) on an instrument equipped with a reverse-phase C18 column (1.7  $\mu\text{m}$  particle size, 2.1  $\times$  50 mm), dual atmospheric pressure chemical ionization (API)/electrospray (ESI) mass spectrometry detector, or Direct Analysis in Real Time (DART) ionization, and a photodiode array detector.

Chiral analytical normal phase HPLC was performed at a column temperature of 20 °C on a chromatograph equipped with a diode array detector (210 nm, 230 nm, 250 nm, 254 nm, or 280 nm).

Optical rotations were recorded on a polarimeter at 546, 578, and 589 nm, 23°C, with a 0.5 dm path length sample holder. Concentration are given in g/100 mL.

Analytical and preparative thin-layer chromatography (TLC) was performed using pre-coated plates (0.25 mm thickness); TLC visualization was accomplished by irradiation with a UV lamp (254 nm) and/or staining with *p*-anisaldehyde or  $\text{KMnO}_4$  solutions.

Flash column chromatography was performed using silica gel 60 Å (40-63 micron) or using an automated flash purification system. Gradient elution volumes are reported as column volumes (CV).

All yields refer to chromatographically and spectroscopically ( $^1\text{H}$  NMR) homogeneous materials unless indicated otherwise. Solvents were purified using a purification system. All commercially available materials were purchased from suppliers and used as received unless indicated otherwise.

Abbreviations: AcOH = acetic acid, Boc = *tert*-butoxycarbonyl, CAM = ceric ammonium molybdate, DCM = dichloromethane, DMAP = *N,N*-dimethyl-4-aminopyridine, *N,N*-DMF = *N,N*-dimethylformamide, DIC = *N,N*-diisopropylcarbodiimide, EDC = 1-Ethyl-3-(3-dimethylaminopropyl)carbodiimide, EtOAc = ethyl acetate, Hex = Hexanes, HOBt = 1-Hydroxybenzotriazole, TEA = triethylamine, THF = tetrahydrofuran. Standard three-letter abbreviations used for proteinogenic amino acids.

## B. Preparation of 2-Arylindole Derivatives.

With the exception of compound **19** (*vide infra*) all substrates used in this study were prepared according to one of two routes outlined in Scheme 1. The following detailed procedures below are representative of the conditions used to prepare the desired substrates:

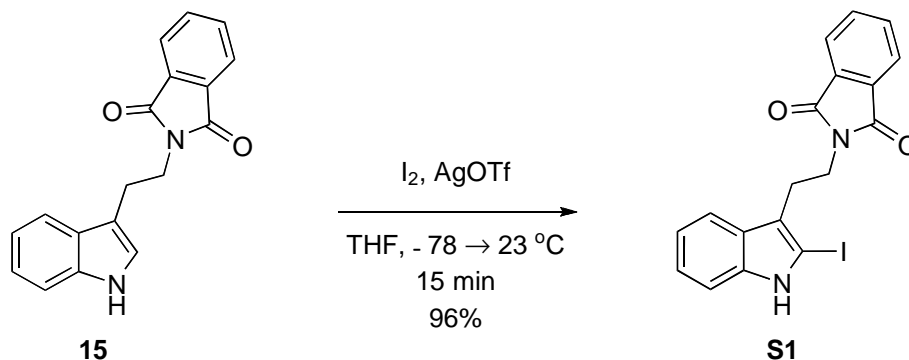

***N,N*-Phthaloyl-2-iodotryptamine (S1, Scheme 1 - Route a).** A flame dried 200-mL three-neck round bottom flask was charged with *N,N*-phthaloyltryptamine **15** (3.23 g, 11.1 mmol, 1 equiv.), iodine (3.12 g, 12.3 mmol, 1.11 equiv.), and a stirring bar and sealed under argon atmosphere. Anhydrous THF (110 mL) was added via syringe and the resulting mixture was agitated at 23  $^{\circ}C$  and then cooled to -78  $^{\circ}C$ . After 15 min, AgOTf (3.12 g, 12.3 mmol, 1.11 equiv.) was added via a solid addition funnel. After 5 min, the reaction mixture became a fine yellow suspension and agitation was maintained. After 25 min, TLC analysis (30% EtOAc/hexanes) indicated completion of the reaction. Solid sodium bicarbonate (2.06 g, 24.5 mmol, 2.21 equiv.) was added and the cold bath was removed. After 30 min, the resulting yellow suspension was diluted with EtOAc (100 mL) and a mixture of saturated aqueous sodium thiosulfate-saturated aqueous sodium bicarbonate (1:1, 80 mL) at 23  $^{\circ}C$ . The mixture was filtered through Celite and the filter cake was rinsed with EtOAc (300 mL) and the organic layers were combined. The combined organic layer was washed with brine (200 mL) and dried over solid anhydrous sodium sulfate. The organic layer was filtered and concentrated at reduced pressure on a rotary evaporator to afford **S1** as a yellow crystalline solid (4.45 g, 96%). The crude product was sufficiently pure to be used in subsequent reactions without further purification. A 1-gram sample was purified for characterization by flash column chromatography on silica gel (2.4  $\times$  14.0 cm, eluent 20% EtOAc/hexanes) to provide the product **S1** as a bright yellow solid (960 mg, 96% mass recovery).  $^1H$  NMR (500 MHz,  $CDCl_3$ , 20  $^{\circ}C$ ,  $J$  in Hz)  $\delta$  7.98 (br s, 1H, NH), 7.78 (dd, 2H,  $J$  = 3.0, 5.5 Hz, phthalimide), 7.66 (dd, 2H,  $J$  = 3.0, 5.5 Hz, phthalimide), 7.61 (d, 1H,  $J$  = 8.0 Hz, ArH), 7.25 (dt, 1H,  $J$  = 1.0, 8.0 Hz, ArH), 7.08 (dt, 1H,  $J$  = 1.0, 7.0 Hz, ArH), 7.03 (dt, 1H,  $J$  = 1.5, 7.0 Hz, ArH), 3.90 (t, 2H,  $J$  = 7.5 Hz, =C-CH<sub>2</sub>CH<sub>2</sub>N), 3.06 (t, 2H,  $J$  = 7.5 Hz, =C-CH<sub>2</sub>CH<sub>2</sub>N);  $^{13}C$  NMR (126 MHz,  $CDCl_3$ , 20  $^{\circ}C$ )  $\delta$  168.5, 139.0, 134.0, 132.4, 127.7, 123.4, 122.6, 120.3, 118.8, 118.1, 110.6, 78.5, 37.9, 26.2; FTIR (neat,  $cm^{-1}$ ) 3352 (br m), 3050 (w), 2935(w), 1771 (m), 1701 (s), 1653 (m), 1558 (m), 1540 (m), 1396 (s), 1362 (m), 1338 (m), 1101 (w), 742 (w), 717 (m); HRMS (DART) calc'd for C<sub>18</sub>H<sub>12</sub>IN<sub>2</sub>O<sub>2</sub> [M-H]<sup>-</sup>: 414.9949, found: 414.9965; TLC R<sub>f</sub> = 0.50 (30% EtOAc/hexanes, UV, CAM).

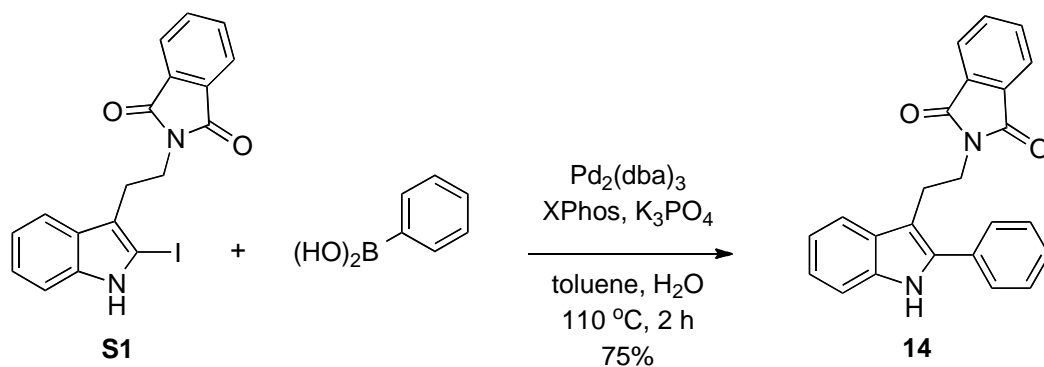

***N,N*-Phthaloyl-2-phenyltryptamine (14, Scheme 1 - Route a).** A flame dried 15-mL pressure flask was charged with 2-iodotryptamine **S1** (100 mg, 0.240 mmol, 1 equiv.), phenylboronic acid (45.3 mg, 0.360 mmol, 1.50 equiv.),  $\text{Pd}_2(\text{dba})_3$  (5.5 mg, 6.0  $\mu\text{mol}$ , 0.025 equiv.), XPhos (11.7 mg, 0.0240 mmol, 0.100 equiv.), anhydrous potassium phosphate tribasic (104 mg, 0.480 mmol, 2.00 equiv.), and a stirring bar and sealed with a septum under an atmosphere of argon. Toluene (2.4 mL) followed by deionized water (240  $\mu\text{L}$ ) were added via syringe and the mixture was agitated to give a clear red solution. The septum was replaced with the pressure flask's Teflon seal and the entire mixture was heated in an oil bath set to 110  $^\circ\text{C}$ . After 5 min, the reaction mixture turned into a pale yellow clear solution and the mixture was maintained at 110  $^\circ\text{C}$ . After 2 h, the oil bath was removed and the mixture was allowed to cool to 23  $^\circ\text{C}$  and TLC analysis (10% EtOAc in hexanes) indicated completion of the reaction. The volatiles were removed under reduced pressure and the crude mixture was purified by flash column chromatography on silica gel (3.0  $\times$  14.0 cm, eluent 15% EtOAc/hexanes) to afford the product **14** as yellow crystals (66.2 mg, 75%).  $^1\text{H NMR}$  (500 MHz,  $\text{CDCl}_3$ , 20  $^\circ\text{C}$ ,  $J$  in Hz)  $\delta$  8.08 (br. s, 1H, NH), 7.79 (d, 1H,  $J = 7.5$  Hz, ArH), 7.75 (dd, 2H,  $J = 3.5, 6.0$  Hz, phthalimide), 7.65 (dd, 2H,  $J = 3.0, 5.5$  Hz, phthalimide), 7.58-7.55 (m, 2H, ArH), 7.40 (tt, 2H,  $J = 1.5, 8.0$  Hz, ArH), 7.35 (dt, 1H,  $J = 1.0, 8.0$  Hz, ArH), 7.29 (tt, 1H,  $J = 1.0, 7.0$  Hz, ArH), 7.19 (tt, 1H,  $J = 1.0, 8.0$  Hz, ArH), 7.14 (tt, 1H,  $J = 1.0, 7.0$  Hz, ArH), 3.97 (t, 2H,  $J = 8.0$  Hz, =C-CH<sub>2</sub>CH<sub>2</sub>N), 3.24 (t, 2H,  $J = 8.0$  Hz, =C-CH<sub>2</sub>CH<sub>2</sub>N);  $^{13}\text{C NMR}$  (126 MHz,  $\text{CDCl}_3$ , 20  $^\circ\text{C}$ )  $\delta$  168.4, 136.0, 135.4, 133.9, 132.8, 132.4, 129.3, 129.2, 128.0, 128.0, 123.3, 122.7, 120.2, 119.2, 111.1, 109.3, 38.6, 24.1; FTIR (neat,  $\text{cm}^{-1}$ ) 3359 (br. m), 3050 (w), 3021 (w), 2942 (w), 2863 (w), 1766 (m), 1701 (s), 1446 (m), 1431 (m), 1396 (s), 1356 (m), 742 (s), 716 (s), 695 (s); HRMS (DART) calc'd for  $\text{C}_{24}\text{H}_{17}\text{N}_2\text{O}_2$   $[\text{M}-\text{H}]^-$ : 365.1296, found: 365.1301; TLC  $R_f = 0.31$  (20% EtOAc/hexanes, UV, CAM).

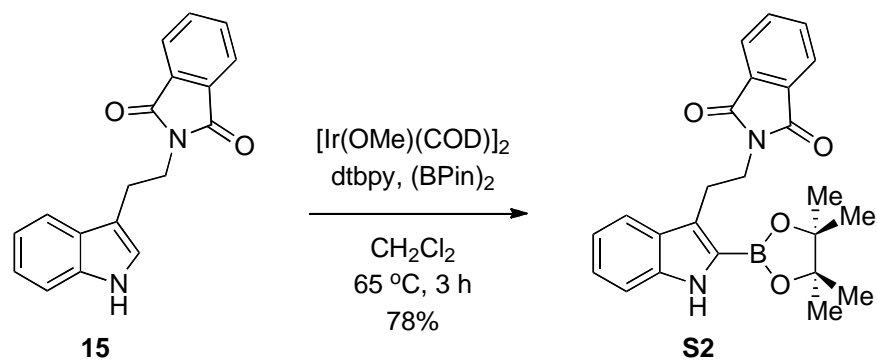

***N,N*-Phthaloyl-2-(4,4,5,5-tetramethyl-1,3,2-dioxaborolan-2-yl)tryptamine (S2, Scheme 1 - Route b).** A flame dried 15-mL pressure flask was charged with (1,5-cyclooctadiene)(methoxy)iridium(I) dimer (3.4 mg, 5.2  $\mu\text{mol}$ , 0.015 equiv.), 4,4'-di-*tert*-butyl-2,2'-dipyridyl (2.8 mg, 1.0  $\mu\text{mol}$ , 0.03 equiv.), bis(pinacolato)diboron (177 mg, 0.690 mmol, 2.00 equiv.), *N,N*-phthaloyltryptamine **15** (100 mg, 0.345 mmol, 1 equiv.), and a stirring bar and sealed with a septum under an atmosphere of argon. Anhydrous dichloromethane (2.2 mL) was added via syringe to give a colorless suspension. The septum was replaced with the pressure flask's Teflon seal and the entire mixture was heated in an oil bath set to 65  $^\circ\text{C}$ . The reaction mixture gradually turned into a clear dark amber solution. After 3 h, the mixture was allowed to cool to 23  $^\circ\text{C}$  and the volatiles were removed under reduced pressure and the crude mixture was purified by flash column chromatography on silica gel (2.5  $\times$  11.0 cm, eluent 20% EtOAc/hexanes) to afford product **S2** as a pale yellow powder (112 mg, 78%).  **$^1\text{H}$  NMR** (500 MHz,  $\text{CDCl}_3$ , 20  $^\circ\text{C}$ ,  $J$  in Hz) 8.39 (br. s, 1H, **NH**), 7.75 (dd, 2H,  $J = 3.0, 5.0$  Hz, phthalimide), 7.72 (d, 1H,  $J = 8.0$  Hz, **ArH**), 7.62 (dd, 2H,  $J = 3.0, 5.5$  Hz, phthalimide), 7.29 (d, 1H,  $J = 8.5$  Hz, **ArH**), 7.16 (t, 1H,  $J = 7.5$  Hz, **ArH**), 7.03 (t, 1H,  $J = 7.5$  Hz, **ArH**), 3.97 (t, 2H,  $J = 7.5$  Hz, =C- $\text{CH}_2\text{CH}_2\text{N}$ ), 3.37 (t, 2H,  $J = 7.5$  Hz, =C- $\text{CH}_2\text{CH}_2\text{N}$ ), 1.28 (s, 12H, -B[OC(CH<sub>3</sub>)<sub>2</sub>]<sub>2</sub>);  **$^{13}\text{C}$  NMR** (126 MHz,  $\text{CDCl}_3$ , 20  $^\circ\text{C}$ )  $\delta$  168.4, 138.2, 133.8, 132.5, 128.4, 125.1, 123.9, 123.2, 119.8, 119.6, 111.5, 84.1, 39.4, 24.9, 24.7; **FTIR** (neat,  $\text{cm}^{-1}$ ) 3453 (m), 3381 (br. s), 3058 (w), 2978 (s), 2935 (m), 2252 (w), 1770 (s), 1705 (s), 1619 (w), 1576 (m), 1551 (s), 1464 (m), 1436 (m), 1392 (s), 1263 (m), 1137 (s), 1105 (m), 1080 (m), 1018 (w), 961 (w), 907 (w), 857 (w), 734 (s), 713 (s); **HRMS** (DART) calc'd for  $\text{C}_{24}\text{H}_{26}\text{BN}_2\text{O}_4$  [M+H]<sup>+</sup>: 417.1986, found: 417.1978; **TLC**  $R_f = 0.48$  (30% EtOAc/hexanes, UV, CAM).

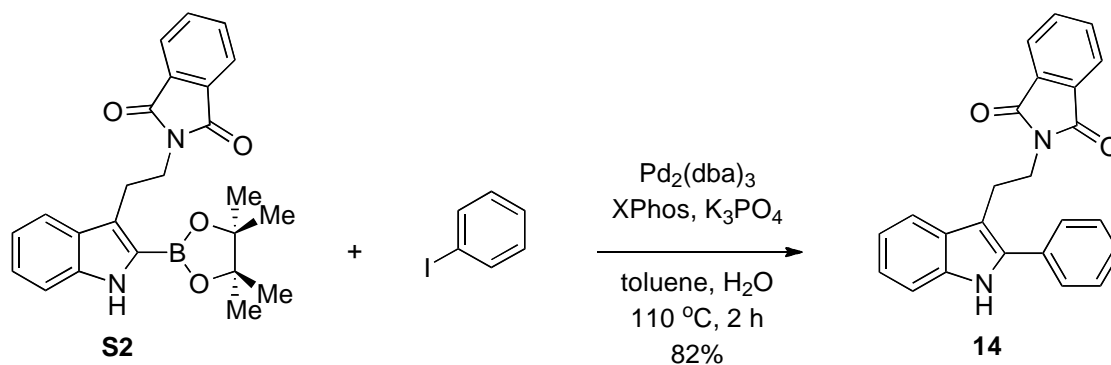

***N,N*-Phthaloyl-2-phenyltryptamine (14)**, Scheme 1 - Route b). A flame dried 15-mL pressure flask was charged with the boronic acid ester **S2** (150 mg, 0.360 mmol, 1.50 equiv.),  $\text{Pd}_2(\text{dba})_3$  (5.5 mg, 6.0  $\mu\text{mol}$ , 0.025 equiv.), XPhos (11.7 mg, 0.024 mmol, 0.10 equiv.), anhydrous potassium phosphate tribasic (104 mg, 0.480 mmol, 2.00 equiv.), and a stirring bar and sealed with a septum under an atmosphere of argon. Iodobenzene (27.4  $\mu\text{L}$ , 0.240 mmol, 1 equiv.), toluene (2.4 mL), and deionized water (240  $\mu\text{L}$ ) were added via syringe and the mixture was agitated to give a clear red solution. The septum was replaced with the pressure flask's Teflon seal and the entire mixture was heated in an oil bath set to 110  $^\circ\text{C}$ . After 5 min, the reaction mixture turned into a pale yellow clear solution and the mixture was maintained at 110  $^\circ\text{C}$ . After 2 h, the oil bath was removed and the mixture was allowed to cool to 23  $^\circ\text{C}$  and TLC analysis (10% EtOAc/hexanes) indicated the completion of the reaction. The volatiles were removed under reduced pressure and the crude mixture was purified by flash column chromatography on silica gel (3.0  $\times$  14.0 cm, eluent 15% EtOAc/hexanes) to afford the product **14** as yellow crystals (72.4 mg, 82%). (For characterization data, please see the procedure for synthesis of **14** from **S1**.)

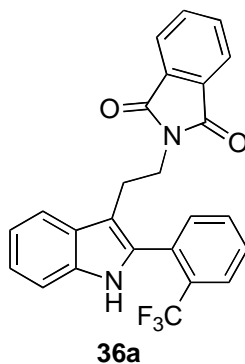

**2-(2-(2-(2-(Trifluoromethyl)phenyl)-1*H*-indol-3-yl)ethyl)isoindoline-1,3-dione (36a)**. Purified by flash column chromatography on silica gel (20% EtOAc/Hex). Yellow foam, 188.9 mg, 90.70% yield.  $^1\text{H}$  NMR (500 MHz,  $\text{CDCl}_3$ , 20  $^\circ\text{C}$ ,  $J$  in Hz)  $\delta$  8.11 (br. s, 1H, NH), 7.81 (d, 1H,  $J = 8.0$  Hz, ArH), 7.78-7.72 (complex m, 3H, ArH/phthalimide), 7.64 (m, 2H, phthalimide), 7.62 (d, 1H,  $J = 7.5$  Hz, ArH), 7.57 (d, 1H,  $J = 7.5$  Hz, ArH), 7.54 (t, 1H,  $J = 8.0$  Hz, ArH), 7.35 (d, 1H,  $J = 8.0$  Hz, ArH), 7.20 (t, 1H,  $J = 8.0$  Hz, ArH), 7.14 (t, 1H,  $J = 7.5$  Hz, ArH), 3.87 (t, 2H,  $J = 8.0$  Hz, =C- $\text{CH}_2\text{CH}_2\text{N}$ ), 3.00 (t, 2H,  $J = 8.0$  Hz, =C- $\text{CH}_2\text{CH}_2\text{N}$ );  $^{13}\text{C}$  NMR (126 MHz,  $\text{CDCl}_3$ , 20  $^\circ\text{C}$ ) 168.4, 135.9, 134.0, 133.7, 132.4, 132.3, 132.0, 131.1, 129.9 (q,  $J = 30.0$  Hz), 129.1, 128.0, 126.6 (q,  $J = 5.2$  Hz), 124.1 (q,  $J = 274.6$  Hz), 123.3, 122.8, 120.1, 119.4, 111.4, 111.1, 38.4, 23.9; FTIR (neat,  $\text{cm}^{-1}$ ) 3460 (m), 3367 (s), 3065 (m), 3022 (m), 2942 (m), 2856 (w), 1766 (m), 1709 (s), 1608 (m), 1579 (w), 1489 (m), 1450 (m), 1436 (m), 1400 (s), 1360

(m), 1310 (s), 1267 (m), 1231 (m), 1216 (m), 1173 (s), 1126 (s), 1108 (m), 1076 (m), 1036 (m), 997 (m), 961 (w), 936 (w), 867 (w), 767 (s), 749 (s), 716 (s); **HRMS** (DART) calc'd for  $C_{25}H_{18}F_3N_2O_2$   $[M+H]^+$ : 435.1315, found:435.1328; **TLC**  $R_f$  = 0.45 (30% EtOAc/Hex).

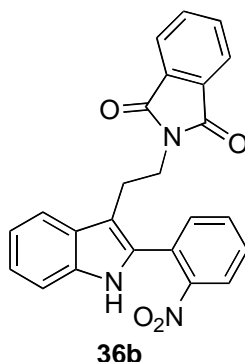

**2-(2-(2-(2-Nitrophenyl)-1H-indol-3-yl)ethyl)isoindoline-1,3-dione (36b).** Purified by flash column chromatography on silica gel (20% acetone/Hex). Orange foam, 171.8 mg, 87.00% yield.  $^1H$  NMR (500 MHz,  $CDCl_3$ , 20 °C,  $J$  in Hz)  $\delta$  8.13 (br. s, 1H, NH), 7.93 (dd, 1H,  $J$  = 1.0, 8.0 Hz, ArH), 7.78 (d, 1H,  $J$  = 8.0 Hz, ArH), 7.74 (dd, 2H,  $J$  = 3.0, 5.5 Hz, phthalimide), 7.67 (dt, 1H,  $J$  = 1.5, 7.5 Hz, ArH), 7.65 (dd, 2H,  $J$  = 2.5, 5.5 Hz, phthalimide), 7.61 (dd, 1H,  $J$  = 1.5, 7.5 Hz, ArH), 7.55 (dt, 1H,  $J$  = 1.5, 8.0 Hz, ArH), 7.33 (d, 1H,  $J$  = 8.0 Hz, ArH), 7.20 (dd, 1H,  $J$  = 1.5, 8.0 Hz, ArH), 7.13 (dt, 1H,  $J$  = 1.0, 8.0 Hz, ArH), 3.86 (t, 2H,  $J$  = 8.0 Hz, =C-CH<sub>2</sub>CH<sub>2</sub>N), 3.00 (t, 2H,  $J$  = 8.0 Hz, =C-CH<sub>2</sub>CH<sub>2</sub>N);  $^{13}C$  NMR (126 MHz,  $CDCl_3$ , 20 °C)  $\delta$  168.3, 149.6, 136.3, 134.0, 133.6, 132.9, 132.2, 130.3, 129.7, 128.1, 127.0, 124.6, 123.3, 123.1, 120.2, 119.4, 111.7, 111.4, 38.3, 23.8; **FTIR** (neat,  $cm^{-1}$ ) 3374 (s), 3058 (m), 3022 (m), 2942 (m), 2863 (m), 1766 (m), 1705 (s), 1612 (m), 1522 (s), 1453 (m), 1439 (m), 1400 (s), 1356 (s), 1346 (s), 1184 (m), 1126 (m), 1101 (m), 993 (m), 849 (m), 749 (s), 716 (s); **HRMS** (DART) calc'd for  $C_{24}H_{18}N_3O_4$   $[M+H]^+$ : 412.1292, found: 412.1250; **TLC**  $R_f$  = 0.21 (30% EtOAc/Hex).

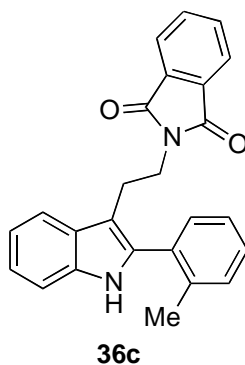

**2-(2-(2-(o-Tolyl)-1H-indol-3-yl)ethyl)isoindoline-1,3-dione (36c).** Purified by flash column chromatography on silica gel (20% EtOAc/Hex). Yellow foam, 180 mg, 99.0% yield.  $^1H$  NMR (500 MHz,  $CDCl_3$ , 20 °C,  $J$  in Hz)  $\delta$  7.95 (br. s, 1H, NH), 7.76 (d, 1H,  $J$  = 7.5 Hz, ArH), 7.71 (dd, 2H,  $J$  = 3.0, 5.0 Hz, phthalimide), 7.63 (dd, 2H,  $J$  = 3.0, 5.5 Hz), 7.34-7.29 (complex m, 2H, ArH), 7.26 (dt, 1H,  $J$  = 1.5, 7.5 Hz, ArH), 7.22 (dd, 1H,  $J$  = 0.5, 7.5 Hz, ArH), 7.19-7.14 (complex m, 2H, ArH), 7.10 (dt, 1H,  $J$  = 1.0, 7.5 Hz, ArH), 3.86 (t, 2H,  $J$  = 7.5 Hz, =C-CH<sub>2</sub>CH<sub>2</sub>N), 3.01 (t, 2H,  $J$  = 7.5 Hz, =C-CH<sub>2</sub>CH<sub>2</sub>N), 2.22 (s, 3H, -CH<sub>3</sub>);  $^{13}C$  NMR (126 MHz,  $CDCl_3$ , 20 °C)  $\delta$  168.4, 137.6, 135.8, 135.5, 133.9, 132.4, 132.2,



131.0, 130.6, 128.8, 128.5, 125.9, 123.2, 122.2, 119.9, 119.1, 111.0, 110.1, 38.5, 23.9, 20.2; **FTIR** (neat,  $\text{cm}^{-1}$ ) 3453 (m), 3374 (s), 3050 (m), 3022 (m), 2928 (m), 2849 (m), 2245 (m), 1770 (s), 1705 (s), 1615 (m), 1486 (m), 1453 (s), 1436 (s), 1396 (s), 1356 (s), 1338 (s), 1302 (s), 1234 (w), 1187 (w), 1169 (m), 1123 (m), 1101 (s), 1087 (m), 1040 (m), 1008 (s), 936 (m), 871 (m), 763 (s), 734 (s), 720 (s); **HRMS** (DART) calc'd for  $\text{C}_{25}\text{H}_{21}\text{N}_2\text{O}_2$   $[\text{M}+\text{H}]^+$ : 381.1598, found: 381.1608; **TLC**  $R_f$  = 0.24 (20% acetone/Hex).

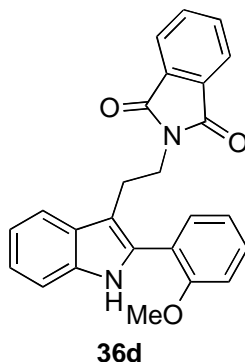

**2-(2-(2-(2-methoxyphenyl)-1H-indol-3-yl)ethyl)isoindoline-1,3-dione (36d)**. Purified by flash column chromatography on silica gel (20% EtOAc/Hex). Yellow foam, 135.9 mg, 23.00% yield (unoptimized).  **$^1\text{H}$  NMR** (500 MHz,  $\text{CDCl}_3$ , 20 °C,  $J$  in Hz)  $\delta$  7.83 (dd, 2H,  $J$  = 3.0, 5.0 Hz, phthalimide), 7.77 (m, 1H, ArH), 7.69 (dd, 2H,  $J$  = 3.0, 5.5 Hz, phthalimide), 7.34 (dt, 1H,  $J$  = 2.0, 7.5 Hz, ArH), 7.33 (d, 1H,  $J$  = 8.0 Hz, ArH), 7.18-7.12 (complex m, 4H, phthalimide/ ArH), 7.09-7.02 (complex m, 2H, ArH), 4.04 (t, 2H,  $J$  = 8.0 Hz, =C- $\text{CH}_2\text{CH}_2\text{N}$ ), 3.73 (s, 3H, -OMe), 3.18 (t, 2H,  $J$  = 8.0 Hz, =C- $\text{CH}_2\text{CH}_2\text{N}$ );  **$^{13}\text{C}$  NMR** (126 MHz,  $\text{CDCl}_3$ , 20 °C)  $\delta$  168.6, 154.5, 137.2, 134.1, 132.5, 128.5, 128.3, 128.2, 128.2, 127.4, 123.4, 122.3, 121.1, 119.9, 119.2, 112.6, 112.5, 111.2, 55.9, 38.7, 24.8; **FTIR** (neat,  $\text{cm}^{-1}$ ) 3050 (w), 2928 (w), 2849 (w), 2835 (w), 1770 (m), 1709 (s), 1608 (w), 1594 (m), 1507 (s), 1461 (s), 1436 (m), 1396 (s), 1371 (m), 1356 (m), 1249 (m), 1227 (m), 1094 (m), 1018 (m), 993 (m), 867 (w), 745 (s), 716 (s); **HRMS** (DART) calc'd for  $\text{C}_{25}\text{H}_{21}\text{N}_2\text{O}_3$   $[\text{M}+\text{H}]^+$ : 397.1547, found: 397.1535; **TLC**  $R_f$  = 0.38 (30% EtOAc/Hex).

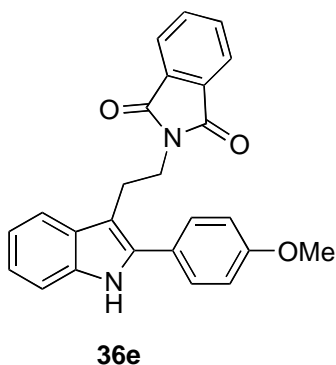

**2-(2-(2-(4-methoxyphenyl)-1H-indol-3-yl)ethyl)isoindoline-1,3-dione (36e)**. Purified by flash column chromatography on silica gel (20% EtOAc/Hex). Yellow foam, 253 mg, 99.0% yield.  **$^1\text{H}$  NMR** (500 MHz,  $\text{CDCl}_3$ , 20 °C,  $J$  in Hz)  $\delta$  7.98 (br. s, 1H, NH), 7.76-7.72 (complex m, 3H, phthalimide/ArH), 7.66 (dd, 2H,  $J$  = 3.0, 5.5 Hz, phthalimide), 7.49 (d, 2H,  $J$  = 8.0 Hz, ArH), 7.33 (d, 1H,  $J$  = 7.5 Hz, ArH), 7.17 (t, 1H,  $J$  = 7.0 Hz, ArH), 7.13 (t, 1H,  $J$  = 7.0 Hz, ArH), 6.93 (d, 2H,  $J$  = 8.0 Hz, ArH), 3.96 (t, 2H,  $J$  = 7.5 Hz, =C- $\text{CH}_2\text{CH}_2\text{N}$ ), 3.81 (s, 3H, -OMe), 3.21 (t, 2H,  $J$  = 8.0 Hz, =C- $\text{CH}_2\text{CH}_2\text{N}$ );  **$^{13}\text{C}$  NMR** (126 MHz,

CDCl<sub>3</sub>, 20 °C)  $\delta$  168.5, 159.5, 135.9, 135.4, 133.9, 132.4, 129.4, 129.3, 125.4, 123.3, 122.4, 120.1, 119.0, 114.6, 110.9, 108.6, 55.5, 38.6, 24.1; **FTIR** (neat, cm<sup>-1</sup>) 3367 (s), 3058 (w), 2921 (m), 2849 (m), 2835 (m), 1770 (m), 1705 (s), 1608 (m), 1507 (m), 1461 (s), 1443 (s), 1396 (s), 1356 (m), 1281 (m), 1249 (s), 1177 (m), 1123 (m), 1101 (m), 1029 (m), 997 (m), 907 (m), 835 (m), 734 (s), 716 (s); **HRMS** (DART) calc'd for C<sub>25</sub>H<sub>21</sub>N<sub>2</sub>O<sub>3</sub> [M+H]<sup>+</sup>: 397.1547, found: 397.1532; **TLC** R<sub>f</sub> = 0.30 (30% EtOAc/Hex).

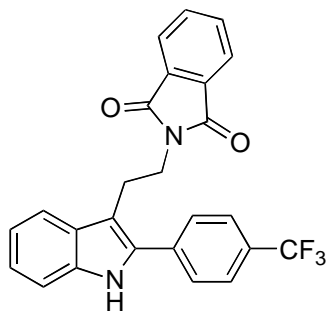

**36f**

**2-(2-(2-(4-(Trifluoromethyl)phenyl)-1H-indol-3-yl)ethyl)isoindoline-1,3-dione (36f)**. Purified by flash column chromatography on silica gel (20% EtOAc/Hex). Yellow foam, 268 mg, 96.4% yield. **<sup>1</sup>H NMR** (500 MHz, CDCl<sub>3</sub>, 20 °C, *J* in Hz) 8.09 (br. s, 1H, NH), 7.78 (d, 1H, *J* = 8.0 Hz, ArH), 7.72 (dd, 2H, *J* = 3.0, 5.5 Hz, phthalimide), 7.68-7.63 (complex m, 4H), 7.60 (d, 2H, *J* = 8.5 Hz, ArH), 7.37 (d, 1H, *J* = 8.0 Hz, ArH), 7.23 (dt, 1H, *J* = 1.0, 8.0 Hz, ArH), 7.17 (dt, 1H, *J* = 1.0, 8.0 Hz, ArH), 3.95 (t, 2H, *J* = 7.5 Hz, =C-CH<sub>2</sub>CH<sub>2</sub>N), 3.27 (t, 2H, *J* = 8.0 Hz, =C-CH<sub>2</sub>CH<sub>2</sub>N); **<sup>13</sup>C NMR** (126 MHz, CDCl<sub>3</sub>, 20 °C) 168.4, 136.3, 136.3, 134.1, 133.7, 132.2, 129.6 (q, *J* = 32.9 Hz), 129.2, 128.0, 126.1 (q, *J* = 4.0 Hz), 124.2 (q, *J* = 27.2 Hz), 123.5, 123.3, 120.5, 119.4, 111.3, 111.0, 38.5, 24.0; **FTIR** (neat, cm<sup>-1</sup>) 3460 (w), 3374 (m), 3065 (w), 3022 (w), 2935 (w), 2863 (w), 1770 (m), 1705 (s), 1615 (m), 1457 (m), 1439 (m), 1396 (s), 1356 (m), 1320 (s), 1256 (w), 1166 (s), 1119 (s), 1069 (s), 1015 (m), 997 (w), 936 (w), 846 (m), 749 (s), 716 (s); **HRMS** (DART) calc'd for C<sub>25</sub>H<sub>18</sub>F<sub>3</sub>N<sub>2</sub>O<sub>2</sub> [M+H]<sup>+</sup>: 435.1315, found: 435.1320; **TLC** R<sub>f</sub> = 0.38 (20% EtOAc/Hex).

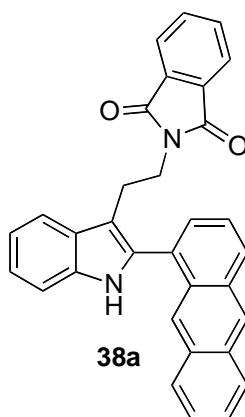

**38a**

**2-(2-(2-(Anthracen-1-yl)-1H-indol-3-yl)ethyl)isoindoline-1,3-dione (38a)**. Purified by flash column chromatography on silica gel (20% EtOAc/Hex). Yellow foam, 206.2 mg, 92.14% yield. **<sup>1</sup>H NMR** (500 MHz, CDCl<sub>3</sub>, 20 °C, *J* in Hz) 8.32 (s, 1H, ArH), 8.24 (s, 1H, ArH), 8.21 (br. s, 1H, NH), 7.96 (d, 1H, *J* = 8.5 Hz, ArH), 7.92 (d, 1H, *J* = 8.5 Hz, ArH), 7.82 (d, 1H, *J* = 8.0 Hz, ArH), 7.77 (d, 1H, *J* = 8.5 Hz,

ArH), 7.52 (d, 1H,  $J = 6.5$  Hz, ArH), 7.47-7.38 (m, 3H, ArH), 7.38-7.30 (m, 5H, phthalimide/ArH), 7.25 (d, 1H,  $J = 7.5$  Hz, ArH), 7.18 (t, 1H,  $J = 8.0$  Hz, ArH), 3.85 (br. s, 2H, =C-CH<sub>2</sub>CH<sub>2</sub>N), 3.19 (br. s, 2H, =C-CH<sub>2</sub>CH<sub>2</sub>N); <sup>13</sup>C NMR (126 MHz, CDCl<sub>3</sub>, 20 °C) δ 168.2, 136.1, 134.6, 133.3, 132.0, 131.8, 131.8, 131.7, 130.7, 130.1, 129.3, 128.8, 128.6, 128.5, 128.0, 127.0, 125.9, 125.7, 124.9, 124.8, 122.6, 122.5, 120.0, 119.1, 111.5, 111.2, 38.7, 23.5; FTIR (neat, cm<sup>-1</sup>) 3356 (s), 3048 (m), 3014 (w), 2924 (m), 2852 (w), 1768 (m), 1709 (s), 1614 (m), 1460 (m), 1438 (m), 1393 (s), 1362 (m), 1337 (m), 1309 (m), 1102 (m), 1018 (m), 878 (m), 747 (s), 738 (s), 713 (s), 666 (m); HRMS (DART) calc'd for C<sub>32</sub>H<sub>23</sub>N<sub>2</sub>O<sub>2</sub> [M+H]<sup>+</sup>: 467.1754, found: 467.1738; TLC R<sub>f</sub> = 0.47 (30% EtOAc/Hex).

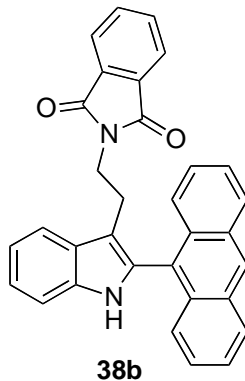

**2-(2-(2-(Anthracen-9-yl)-1H-indol-3-yl)ethyl)isoindoline-1,3-dione (38b).** Purified by flash column chromatography on silica gel (20% EtOAc/Hex). Yellow foam, 211 mg, 94.2% yield. <sup>1</sup>H NMR (500 MHz, CDCl<sub>3</sub>, 20 °C,  $J$  in Hz) δ 8.51 (s, 1H, ArH), 8.15 (br. s, 1H, NH), 8.00 (d, 2H,  $J = 8.5$  Hz, ArH), 7.83 (d, 1H,  $J = 7.5$  Hz, ArH), 7.69 (d, 2H,  $J = 8.5$  Hz, ArH), 7.54 (app. br. s, 4H, phthalimide), 7.41-7.37 (complex m, 3H, ArH), 7.28-7.22 (complex m, 3H, ArH), 7.16 (dt, 1H,  $J = 1.0, 8.0$  Hz, ArH), 3.75 (t, 2H,  $J = 7.0$  Hz, =C-CH<sub>2</sub>CH<sub>2</sub>N), 2.92 (t, 2H,  $J = 7.5$  Hz, =C-CH<sub>2</sub>CH<sub>2</sub>N); <sup>13</sup>C NMR (126 MHz, CDCl<sub>3</sub>, 20 °C) δ 168.2, 136.5, 133.7, 132.2, 131.9, 131.8, 131.4, 128.7, 128.6, 128.5, 126.5, 126.5, 126.4, 125.5, 123.0, 122.4, 120.0, 119.2, 113.4, 111.1, 38.4, 24.1; FTIR (neat, cm<sup>-1</sup>) 3356 (s), 3053 (m), 3025 (m), 2936 (w), 2852 (w), 1768 (m), 1706 (s), 1614 (w), 1488 (w), 1460 (m), 1438 (m), 1399 (s), 1359 (m), 1334 (m), 1217 (m), 1119 (m), 1024 (m), 892 (m), 738 (s), 710 (s); HRMS (DART) calc'd for C<sub>32</sub>H<sub>23</sub>N<sub>2</sub>O<sub>2</sub> [M+H]<sup>+</sup>: 467.1754, found: 467.1763; TLC R<sub>f</sub> = 0.42 (30% EtOAc/Hex).

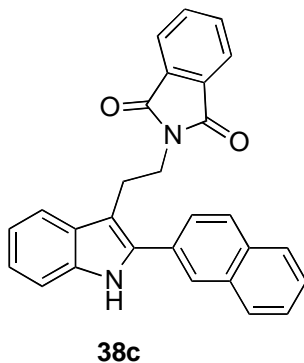

**2-(2-(2-(Naphthalen-2-yl)-1H-indol-3-yl)ethyl)isoindoline-1,3-dione (38c).** Purified by flash column chromatography on silica gel (20% acetone/Hex). Yellow foam, 266 mg, 99.0% yield. <sup>1</sup>H NMR (500 MHz, CDCl<sub>3</sub>, 20 °C,  $J$  in Hz) δ : 8.18 (br. s, 1H, NH), 8.01 (s, 1H, ArH), 7.90 (d, 1H,  $J = 8.0$  Hz, ArH),

7.84 (d, 1H,  $J = 8.0$  Hz, ArH), 7.80 (dd, 1H,  $J = 0.5, 8.0$  Hz, ArH), 7.77 (d, 1H,  $J = 7.5$  Hz, ArH), 7.68 (dd, 1H,  $J = 2.0, 8.5$  Hz, ArH), 7.64 (dd, 2H,  $J = 3.0, 5.5$  Hz, phthalimide), 7.52 (dd, 2H,  $J = 3.0, 5.5$  Hz, phthalimide), 7.49 (dt, 1H,  $J = 1.0, 7.0$  Hz, ArH), 7.45 (dt, 1H,  $J = 1.5, 7.5$  Hz, ArH), 7.39 (dd, 1H,  $J = 0.5, 8.0$  Hz, ArH), 7.21 (dd, 1H,  $J = 1.5, 8.0$  Hz, ArH), 7.17 (dt, 1H,  $J = 1.0, 7.0$  Hz, ArH), 4.02 (t, 2H,  $J = 7.5$  Hz, =C-CH<sub>2</sub>CH<sub>2</sub>N), 3.34 (t, 2H,  $J = 7.5$  Hz, =C-CH<sub>2</sub>CH<sub>2</sub>N); <sup>13</sup>C NMR (126 MHz, CDCl<sub>3</sub>, 20 °C) 168.4, 136.2, 135.3, 133.8, 133.7, 132.7, 132.2, 130.2, 129.5, 128.9, 128.5, 127.9, 126.9, 126.7, 126.4, 125.6, 123.1, 122.9, 120.2, 119.2, 111.1, 109.9, 38.6, 24.2; FTIR (neat, cm<sup>-1</sup>) 3453 (m), 3374 (s), 3058 (m), 3022 (m), 2935 (m), 2863 (w), 1766 (s), 1709 (s), 1612 (m), 1601 (m), 1551 (m), 1453 (m), 1436 (s), 1396 (s), 1360 (s), 1335 (m), 1306 (m), 1259 (m), 1231 (m), 1213 (m), 1144 (m), 1011 (m), 1000 (m), 860 (m), 817 (m), 749 (s), 716 (s); HRMS (DART) calc'd for C<sub>28</sub>H<sub>21</sub>N<sub>2</sub>O<sub>2</sub> [M+H]<sup>+</sup>: 417.1598, found: 417.1593; TLC R<sub>f</sub> = 0.47 (30% EtOAc/Hex).

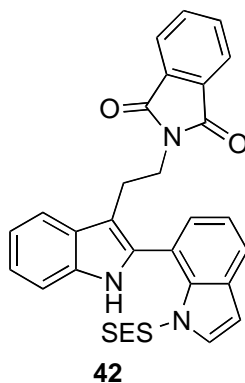

**2-(2-(1'-((2-(trimethylsilyl)ethyl)sulfonyl)-1H,1'-[2,7'-biindol]-3-yl)ethyl)isoindoline-1,3-dione (42).** Purified by flash column chromatography on silica gel (1:1:8 CH<sub>2</sub>Cl<sub>2</sub>/EtOAc/Hex). Yellow solid, 74.8 mg, 96.0% yield. <sup>1</sup>H NMR (500 MHz, CDCl<sub>3</sub>, 20 °C,  $J$  in Hz) 8.74 (br. s, 1H, NH), 7.71 (dd, 2H,  $J = 3.0, 5.5$  Hz, phthalimide), 7.70-7.65 (complex m, 2H, ArH), 7.63 (dd, 2H,  $J = 3.0, 5.5$  Hz, phthalimide), 7.51 (d, 1H,  $J = 3.5$  Hz, ArH), 7.39 (d, 1H,  $J = 8.0$  Hz, ArH), 7.36 (dd, 1H,  $J = 1.5, 7.5$  Hz, ArH), 7.31 (t, 1H,  $J = 7.5$  Hz, ArH), 7.19 (dt, 1H,  $J = 1.0, 8.0$  Hz, ArH), 7.07 (t, 1H,  $J = 7.5$  Hz, ArH), 7.66 (d, 1H,  $J = 3.5$  Hz, ArH), 3.81 (t, 2H,  $J = 7.5$  Hz, =C-CH<sub>2</sub>CH<sub>2</sub>N), 2.83 (app. br. s, 2H, =C-CH<sub>2</sub>CH<sub>2</sub>N), 2.61 (m, 2H, -SO<sub>2</sub>CH<sub>2</sub>CH<sub>2</sub>SiMe<sub>3</sub>), 0.66 (m, 2H, -SO<sub>2</sub>CH<sub>2</sub>CH<sub>2</sub>SiMe<sub>3</sub>), -0.28 (s, 9H, -SiMe<sub>3</sub>); <sup>13</sup>C NMR (126 MHz, CDCl<sub>3</sub>, 20 °C)  $\delta$  168.3, 135.7, 134.6, 134.0, 133.7, 133.3, 132.3, 130.1, 130.0, 127.4, 123.5, 123.3, 123.0, 122.9, 120.2, 119.3, 118.9, 112.1, 111.5, 108.0, 51.4, 38.5, 24.3, 10.2, -2.0; FTIR (neat, cm<sup>-1</sup>) 3381 (m), 3108 (w), 3050 (w), 3022 (w), 2950 (m), 2892 (w), 1766 (m), 1705 (s), 1612 (w), 1457 (m), 1436 (m), 1400 (s), 1360 (s), 1306 (m), 1249 (s), 1231 (m), 1169 (s), 1155 (s), 1126 (s), 1101 (m), 1069 (m), 1018 (m), 979 (m), 889 (w), 857 (m), 839 (m), 799 (m), 745 (s), 716 (s), 698 (m), 662 (m); HRMS (DART) calc'd for C<sub>31</sub>H<sub>30</sub>N<sub>3</sub>O<sub>4</sub>SSi [M-H]<sup>-</sup>: 568.1732, found: 568.1732; TLC R<sub>f</sub> = 0.16 (1:1:8 CH<sub>2</sub>Cl<sub>2</sub>/EtOAc/Hex).

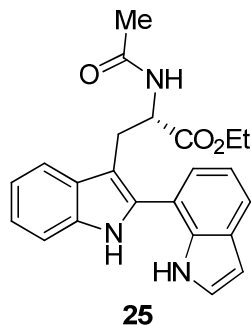

**(2'S)-3-(2-N-Acetylamino-2-ethoxycarbonylethyl)-2-(7-indolyl)-1H-indole (25).** Purified by column chromatography on silica gel (50% EtOAc/Hex). Yellow foam, 514.91 mg, 73% yield. **<sup>1</sup>H NMR** (500 MHz, CDCl<sub>3</sub>, *J* in Hz) δ 9.02 (s, 1H), 8.19 (s, 1H), 7.73 (dd, *J* = 7.5, 0.8, 1H), 7.63 (d, *J* = 7.9, 1H), 7.37 (d, *J* = 8.0, 1H), 7.27 – 7.17 (m, 5H), 6.64 (dd, *J* = 3.1, 2.0, 1H), 5.77 (d, *J* = 8.3, 1H), 4.78 (ddd, *J* = 8.3, 6.8, 5.2, 1H), 3.83 (dq, *J* = 10.7, 7.1, 1H), 3.46 (dq, *J* = 10.7, 7.1, 1H), 3.40 (dd, *J* = 14.6, 5.1, 1H), 3.30 (dd, *J* = 14.6, 6.8, 1H), 1.48 (s, 3H), 1.01 (t, *J* = 7.1, 3H); **<sup>13</sup>C NMR** (126 MHz, CDCl<sub>3</sub>) δ 172.0, 170.0, 136.2, 135.0, 133.6, 129.5, 128.8, 125.3, 123.1, 122.7, 121.6, 120.3, 120.2, 119.1, 116.4, 111.3, 108.7, 103.2, 61.5, 53.1, 27.5, 22.8, 14.0; **FTIR** (cm<sup>-1</sup>) 3395, 2929, 1727, 1653, 1514, 1435, 1335, 1211, 1025; **UPLC-MS** (ESI) *m/z* 376.17 (calculated for C<sub>22</sub>H<sub>21</sub>N<sub>3</sub>O<sub>3</sub>[M + H<sup>+</sup>] = 376.16); **TLC** R<sub>f</sub> = 0.31 (50% EtOAc/Hex); [α]<sub>546 nm</sub><sup>20 °C</sup> = +177.7 (*c* = 0.115, CHCl<sub>3</sub>).

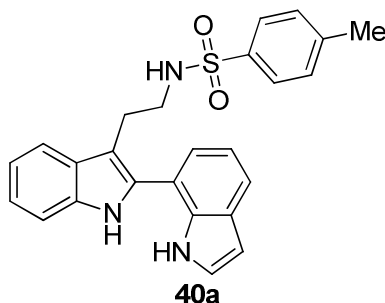

**3-(2-N-(4-Toluenesulfonyl)aminoethyl)-2-(7-indolyl)-1H-indole (40a).** Purified by column chromatography on silica gel (30% EtOAc/Hex). Yellow foam, 1.30 g, 43% yield. **<sup>1</sup>H NMR** (500 MHz, CDCl<sub>3</sub>, *J* in Hz) δ 9.19 (brs, 1H), 8.56 (brs, 1H), 7.80 – 7.74 (m, 1H), 7.72 (t, *J* = 6.4, 1H), 7.63 (t, *J* = 7.0, 1H), 7.48 (t, *J* = 7.3, 2H), 7.30 – 7.23 (m, 4H), 7.19 – 7.11 (m, 3H), 6.71 – 6.65 (m, 1H), 3.28 – 3.19 (m, 2H), 2.97 (q, *J* = 6.6, 2H), 2.39 (s, 3H); **<sup>13</sup>C NMR** (126 MHz, CDCl<sub>3</sub>) δ 143.4, 141.7, 136.7, 134.5, 133.3, 130.1, 129.8, 128.7, 127.4, 127.2, 125.2, 123.1, 122.3, 121.5, 120.3, 119.9, 116.4, 109.1, 103.3, 84.2, 43.2, 25.2, 21.7; **FTIR** (cm<sup>-1</sup>) 3389, 3057, 2926, 2852, 1597, 1428, 1153, 1092; **UPLC-MS** (ESI)*m/z*430.16 (calculated for C<sub>25</sub>H<sub>23</sub>N<sub>3</sub>O<sub>2</sub>S [M + H<sup>+</sup>] = 430.15); **TLC** R<sub>f</sub> = 0.59 (6% EtOAc/DCM).

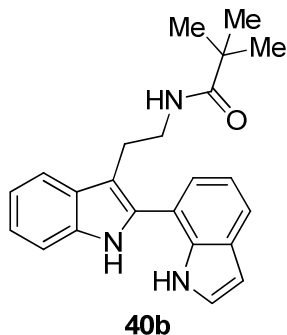

**3-(2-*N*-Pivaloylaminoethyl)-2-(7-indolyl)-1*H*-indole(40b).** Purified by column chromatography on silica gel (25% EtOAc/Hex). Yellow foam, 1.46 g, 55% yield. <sup>1</sup>H NMR (500 MHz, CDCl<sub>3</sub>, *J* in Hz) δ 9.17 (s, 1H), 8.13 (s, 1H), 7.72 (dd, *J* = 7.6, 4.3, 2H), 7.40 (d, *J* = 7.9, 1H), 7.30 – 7.28 (m, 1H), 7.26 – 7.18 (m, 3H), 6.64 (dd, *J* = 3.1, 2.0, 1H), 5.71 – 5.63 (m, 1H), 3.52 (dd, *J* = 12.9, 6.7, 2H), 2.99 (t, *J* = 6.8, 2H), 0.91 (s, 9H); <sup>13</sup>C NMR (126 MHz, CDCl<sub>3</sub>) δ 178.8, 136.4, 134.8, 132.9, 129.3, 128.7, 125.3, 123.1, 122.6, 121.4, 120.1, 120.0, 119.4, 116.5, 111.4, 111.3, 103.0, 40.1, 38.6, 27.4, 25.0; FTIR (cm<sup>-1</sup>) 3401, 2964, 1638, 1514, 1431, 1334, 1198; UPLC-MS (ESI) *m/z* 360.22 (calculated for C<sub>23</sub>H<sub>25</sub>N<sub>3</sub>O [M + H<sup>+</sup>] = 360.20); TLC R<sub>f</sub> = 0.47 (35% EtOAc/Hex).

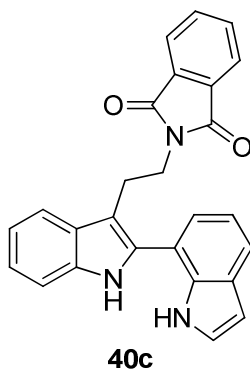

**3-(2-*N,N*-Phthaloylaminoethyl)-2-(7-indolyl)-1*H*-indole (40c).** Purified by column chromatography on silica gel (25% EtOAc/Hex). Yellow solid, 138 mg, 69% yield. <sup>1</sup>H NMR (500 MHz, CDCl<sub>3</sub>, *J* in Hz) δ 9.07 (s, 1H), 8.07 (s, 1H), 7.67 – 7.59 (m, 5H), 7.55 (d, *J* = 8.0 Hz, 1H), 7.33 (d, *J* = 8.1 Hz, 1H), 7.27 – 7.23 (m, 2H), 7.18 – 7.14 (m, 1H), 7.14 – 7.10 (m, 1H), 6.97 – 6.93 (m, 1H), 6.58 (dd, *J* = 3.1, 2.1 Hz, 1H), 3.88 (t, *J* = 6.7 Hz, 2H), 3.19 (t, *J* = 6.7 Hz, 2H); <sup>13</sup>C NMR (126 MHz, CDCl<sub>3</sub>) δ 168.73, 136.17, 135.10, 133.82, 133.10, 132.03, 129.18, 128.52, 125.08, 123.25, 123.06, 122.43, 121.34, 120.09, 120.03, 118.72, 116.31, 111.11, 111.08, 103.16, 39.04, 23.62; FTIR (cm<sup>-1</sup>) 3339, 3289, 3066, 2947, 2911, 1761, 1694, 1614, 1337, 1277; UPLC-MS (ESI) *m/z* 406.15 (calculated for C<sub>26</sub>H<sub>19</sub>N<sub>3</sub>O<sub>2</sub>[M + H<sup>+</sup>] = 406.15); TLC R<sub>f</sub> = 0.31 (25% EtOAc/Hex).

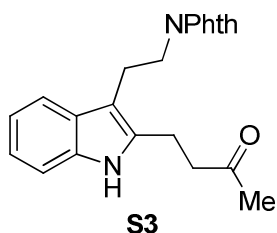

**3-(2-*N,N*-Phthaloylaminoethyl)-2-(3-oxobutyl)-1*H*-indole (S3).** Prepared by the reported procedure.<sup>5</sup> Purified by preparative TLC (50% EtOAc/Hex). Yellow solid, 87.8 mg, 25% yield. <sup>1</sup>H NMR (500 MHz, CDCl<sub>3</sub>, *J* in Hz) δ 8.51 (s, 1H), 7.85 (dd, *J* = 5.4, 3.0, 2H), 7.72 (dd, *J* = 5.5, 3.0, 2H), 7.66 (d, *J* = 7.7, 1H), 7.27 (d, *J* = 7.9, 2H), 7.13 – 7.09 (m, 1H), 7.09 – 7.04 (m, 1H), 3.91 – 3.85 (m, 2H), 3.09 – 3.01 (m, 4H), 2.93 – 2.87 (m, 2H), 2.19 (s, 3H); <sup>13</sup>C NMR (126 MHz, CDCl<sub>3</sub>) δ 209.9, 168.5, 135.9, 135.3, 134.1, 132.4, 128.2, 123.4, 121.6, 119.5, 118.4, 110.8, 107.7, 44.1, 38.9, 30.3, 23.7, 19.4; FTIR (cm<sup>-1</sup>) 1770, 1703, 1615, 1436, 1395, 1359, 1265, 1162, 1020; UPLC-MS (ESI) *m/z* 361.15 (calculated for C<sub>22</sub>H<sub>20</sub>N<sub>2</sub>O<sub>3</sub>[M + H<sup>+</sup>] = 361.15); TLC R<sub>f</sub> = 0.56 (50% EtOAc/Hex).

### 3-(2-*N,N*-Phthaloylaminoethyl)-2-(1-naphthyl)-1*H*-indole (19)

Compound was prepared by a modification of a reported procedure.<sup>6</sup>

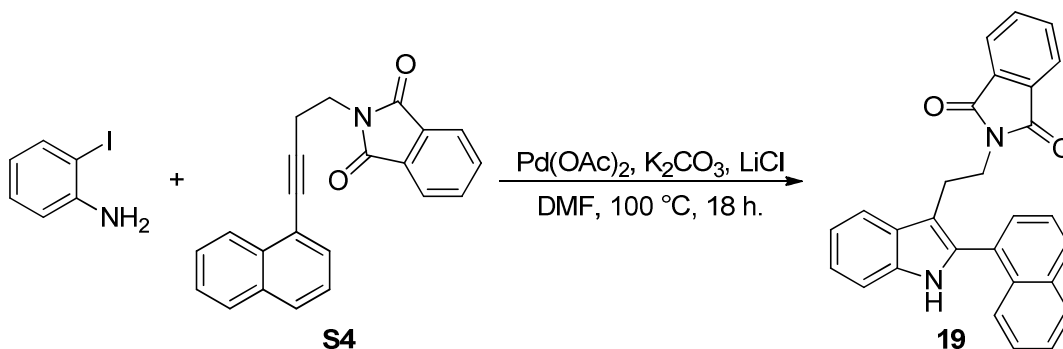

Notes:

- 2-Iodoaniline was recrystallized from boiling hexanes.
- Lithium chloride was kept under high vacuum and flame-dried for 60 seconds prior to use.
- Dry *N,N*-dimethylformamide was degassed by freeze-pump-thaw procedure.

A flame dried 500-mL round bottom flask was charged with 2-iodoaniline (2.18 g, 9.95 mmol, 1.3 equiv.), Pd(OAc)<sub>2</sub> (340 mg, 1.51 mmol, 0.2 equiv.), K<sub>2</sub>CO<sub>3</sub> (3.17 g, 22.94 mmol, 3.0 equiv.) and LiCl (200 mg, 4.72 mmol, 0.62 equiv.). The atmosphere of the flask was evacuated and refilled with nitrogen. To this mixture was added *N,N*-DMF (103 mL), followed by the solution of alkyne **S4** (2.49 g, 7.65 mmol, 1.0 equiv.) in *N,N*-DMF (50 mL). The flask was sealed, flushed with nitrogen and heated at 100 °C in an oil bath for 18 hours. After this time, alkyne **S4** could not be detected by TLC. The reaction mixture was cooled to room temperature, diluted with 500 mL of EtOAc, transferred to a separatory funnel and extracted sequentially with 500 mL of distilled water, 500 mL of 1 M HCl, 500 mL of saturated NaHCO<sub>3</sub>,

and 500 mL of brine. Organic phase was dried over  $\text{MgSO}_4$ , filtered, and the solvent was removed *in vacuo*. The black residue was purified by column chromatography (20% EtOAc/Hex), and thus obtained material was further purified by trituration in boiling DCM and dried under high vacuum. Compound **19** was obtained as a pale yellow solid, 1.27 g (39% yield).

**$^1\text{H}$  NMR** (500 MHz,  $\text{CDCl}_3$ ,  $J$  in Hz)  $\delta$  8.15 (s, 1H), 7.88 – 7.84 (m, 2H), 7.83 (d,  $J = 7.9$ , 1H), 7.78 (d,  $J = 8.4$ , 1H), 7.64 – 7.57 (m, 5H), 7.50 (dd,  $J = 8.2$ , 7.1, 1H), 7.45 (ddd,  $J = 8.1$ , 6.8, 1.1, 1H), 7.39 (d,  $J = 8.0$ , 1H), 7.36 (ddd,  $J = 8.2$ , 6.8, 1.2, 1H), 7.24 (ddd,  $J = 8.3$ , 7.2, 1.1, 1H), 7.17 (ddd,  $J = 8.5$ , 7.2, 0.9, 1H), 3.88 (t,  $J = 7.3$ , 2H), 3.18 – 3.07 (m, 2H);  **$^{13}\text{C}$  NMR** (126 MHz,  $\text{CDCl}_3$ )  $\delta$  168.3, 136.0, 134.3, 133.9, 133.7, 132.5, 132.2, 130.2, 129.1, 128.9, 128.6, 128.5, 126.8, 126.2, 125.9, 125.5, 123.0, 122.5, 120.0, 119.2, 111.4, 111.0, 38.7, 23.8; **FTIR** ( $\text{cm}^{-1}$ ) 3447, 3354, 3054, 2952, 2915, 1765, 1692, 1614, 1431, 1397, 1360, 1017, 971; **UPLC-MS** (ESI)  $m/z$  417.16 (calculated for  $\text{C}_{28}\text{H}_{20}\text{N}_2\text{O}_2[\text{M} + \text{H}^+] = 417.15$ ); **TLC**  $R_f = 0.44$  (30% EtOAc/Hex).



### C. Structure–Enantioselectivity Relationships for Peptide Catalyzed Indole Oxidation.

| Entry | Residue Position        |                      |             |                    |                      |             |             | e.r.  |
|-------|-------------------------|----------------------|-------------|--------------------|----------------------|-------------|-------------|-------|
|       | <i>i</i> -1             | <i>i</i> = catalytic | <i>i</i> +1 | <i>i</i> +2        | <i>i</i> +3          | <i>i</i> +4 | <i>i</i> +5 |       |
| 1     |                         | Asp                  | Pro         | D-Val              | Leu                  | Gly         |             | 67:33 |
| 2     |                         | Asp                  | Pro         | D-Val              | Dhl                  | Gly         |             | 67:33 |
| 3     |                         | Asp                  | Pro         | D-Val              | Tba                  | Gly         |             | 64:36 |
| 4     |                         | Asp                  | Pro         | D-Val              | Cha                  | Gly         |             | 61:39 |
| 5     |                         | Asp                  | Pro         | D-Val              | Cpa                  | Gly         |             | 59:41 |
| 6     |                         | Asp                  | Pro         | D-Val              | D-Leu                | Gly         |             | 53:47 |
| 7     |                         | Asp                  | Pro         | D-Val              | Ile                  | Gly         |             | 62:38 |
| 8     |                         | Asp                  | Pro         | D-Val              | Val                  | Gly         |             | 61:39 |
| 9     |                         | Asp                  | Pro         | D-Val              | Val                  | Val         | Gly         | 59:41 |
| 10    |                         | Asp                  | Pro         | D-Val              | Chg                  | Gly         |             | 60:40 |
| 11    |                         | Asp                  | Pro         | D-Val              | Phe                  |             |             | 59:41 |
| 12    |                         | Asp                  | Pro         | D-Val              | MEA                  |             |             | 57:43 |
| 13    |                         | Asp                  | Pro         | D-Val              | <i>tert</i> -Gln     | Gly         |             | 56:44 |
| 14    |                         | Asp                  | Pro         | D-Val              | Boc <sub>2</sub> Arg | Gly         |             | 55:45 |
| 15    |                         | Asp                  | Pro         | D-Val              | <i>tert</i> -Leu     | Gly         |             | 52:48 |
| 16    |                         | Asp                  | Pro         | D-Val              | ( <i>R</i> )-PEA     |             |             | 60:40 |
| 17    |                         | Asp                  | Pro         | D-Val              | ( <i>R</i> )-2-NEA   |             |             | 62:38 |
| 18    |                         | Asp                  | Pro         | D-Val              | ( <i>R</i> )-1-NEA   |             |             | 58:42 |
| 19    |                         | Asp                  | Pro         | D-Val              | ( <i>S</i> )-1-NEA   |             |             | 52:48 |
| 20    |                         | Asp                  | Pip         | D-Val              | Leu                  | Gly         |             | 67:33 |
| 21    |                         | Asp                  | Bn-Hyp      | D-Val              | Leu                  | Gly         |             | 67:33 |
| 22    |                         | Asp                  | Ala         | D-Val              | Leu                  | Gly         |             | 62:38 |
| 23    |                         | Asp                  | Pro         | D- <i>t</i> Bu-Thr | Leu                  | Gly         |             | 55:45 |
| 24    |                         | Asp                  | D-Pro       | Val                | Phe                  |             |             | 47:53 |
| 25    |                         | Asp                  | D-Pro       | Aib                | Phe                  |             |             | 49:51 |
| 26    |                         | Asp                  | Val         | Pro                | D-Val                | Val         | DPMA        | 52:48 |
| 27    |                         | D-Asp                | D-Pro       | Val                | D-Val                | Abi         |             | 41:59 |
| 28    |                         | Asp                  | Pro         | D-Val              | Cha                  | Gly         | NBA         | 59:41 |
| 29    |                         | Asp                  | Pro         | D-Val              | Leu                  | NPA         |             | 62:38 |
| 30    | Val-Val-Val-D-Pro-D-Val | Asp                  | Pro         | D-Val              | Val                  | Gly         |             | 60:40 |
| 31    | Val-Val-Val-Pro-D-Val   | Asp                  | Pro         | D-Val              | Val                  | Gly         |             | 55:45 |

**Table S1.** Peptide primary structure/enantioselectivity studies for a model indole oxidation reaction. Abbreviations: Dhl = *L*-4,5-di-dehydroleucine, Tba = *L*-β-*tert*-butylalanine, Cha = *L*-β-cyclohexylalanine, Cpa = *L*-β-cyclopropylalanine, Chg = *L*-cyclohexylglycine, MEA = methylamine, PEA = 1-phenylethylamine, 2-NEA = 1-(2-naphthyl)ethylamine, 1-NEA = 1-(1-naphthyl)ethylamine, Pip = *L*-pipercolic acid, Hyp = (2*S*,4*R*)-4-hydroxyproline, Aib = 2-aminoisobutyric acid, DPMA = 1,1-diphenylmethylamine, Abi = abietic acid imide, NBA = *n*-butylamine, NPA = *n*-propylamine.

## D. Peptide Sequence Optimization for Enantioselective Indole Oxidation.

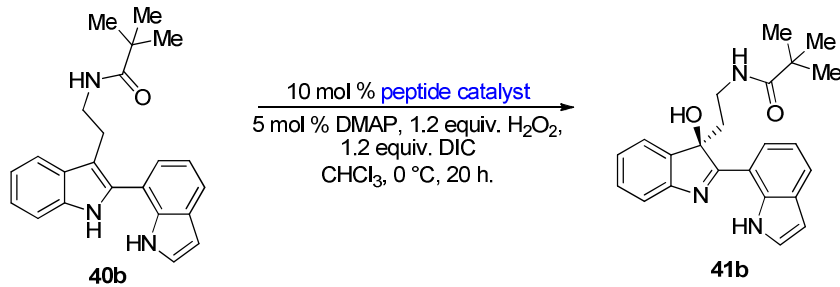

| Entry | Residue Position     |                 |                     |             |             |             |
|-------|----------------------|-----------------|---------------------|-------------|-------------|-------------|
|       | <i>i</i> = catalytic | <i>i</i> +1     | <i>i</i> +2         | <i>i</i> +3 | <i>i</i> +4 | <i>e.r.</i> |
| 1     | Asp                  | Pro             | D-Val               | Leu         | Gly         | 79:21       |
| 2     | Glu                  | Pro             | D-Val               | Leu         | Gly         | 60:40       |
| 3     | Asp                  | <i>t</i> Bu-Hyp | D-Val               | Leu         | Gly         | 77:23       |
| 4     | Asp                  | Pip             | D-Val               | Leu         | Gly         | 75:25       |
| 5     | Asp                  | Leu             | D-Val               | Leu         | Gly         | 74:26       |
| 6     | Asp                  | Pro             | D- <i>tert</i> -Leu | Leu         | Gly         | 79:21       |
| 7     | Asp                  | Pro             | D-Val               | Cpa         | Gly         | 75:25       |
| 8     | Asp                  | Pro             | D-Val               | Tba         | Gly         | 78:22       |
| 9     | Asp                  | Pro             | D-Val               | Leu         | Val         | 84:16       |
| 10    | Asp                  | D-Pro           | Aib                 | Phe         | Gly         | 50:50       |
| 11    | Asp                  | Pro             | D-Val               | Leu         | Ala         | 82:18       |
| 12    | Asp                  | Pro             | D-Val               | Leu         | Phe         | 82:18       |
| 13    | Asp                  | Pro             | D-Val               | Leu         | Leu         | 82:18       |
| 14    | Asp                  | Pro             | D-Val               | Leu         | Ile         | 81:19       |
| 15    | Asp                  | Pro             | D-Val               | Leu         | Pro         | 76:24       |
| 16    | Asp                  | Pro             | D-Val               | Leu         | D-Val       | 64:36       |

**Table S2.** Optimization of the peptide primary structure for enantioselectivity in the oxidation of the model bis(indole) **40b**. Currently optimized sequence (peptide catalyst **22**) depicted in entry 9. Abbreviations: Hyp = (2*S*,4*R*)-4-hydroxyproline, Pip = L-pipecolic acid, Cpa = L- $\beta$ -cyclopropylalanine, Tba = L- $\beta$ -*tert*-butylalanine, Aib = 2-aminoisobutyric acid.

## E. Preparation of Peptides 22 and *ent*-22.

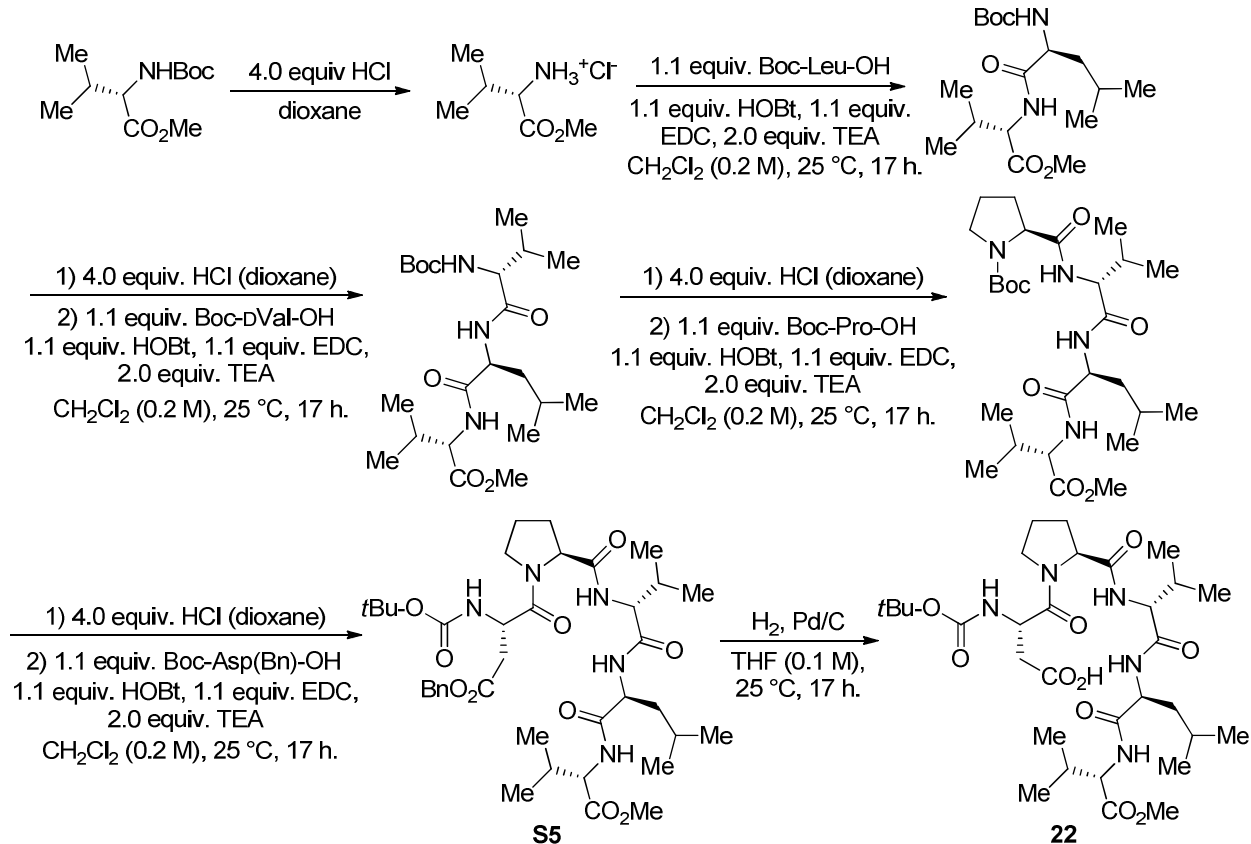

Boc-Val-OMe (1.38 g, 5.96 mmol, 1.0 equiv.) was placed in a flask equipped with magnetic stir bar, flushed with nitrogen, and treated with 4 M solution of HCl in dioxane (6.0 mL). The dissolution of the material was accompanied by intense gas evolution, so in order to avoid pressure build-up inside the flask, the septum was pierced with a needle. After 0.5 h starting material could not be detected by TLC, and the reaction mixture was concentrated under reduced pressure in a rotary evaporator (caution: HCl gas released). Solvent and any residual HCl were removed by exposing the product to high vacuum for a minimum of 1 h. To the resulting white powder were added HOBt·H<sub>2</sub>O (1.01 g, 6.56 mmol, 1.1 equiv.), EDC·HCl (1.26 g, 6.56 mmol, 1.1 equiv.), and Boc-Leu-OH·H<sub>2</sub>O (1.64 g, 6.56 mmol, 1.1 equiv.), the mixture was suspended in dry DCM (30 mL, 0.2 M), and triethylamine (1.66 mL, 11.93 mmol, 2.0 equiv.) was added in one portion. The resulting clear, colorless solution was stirred at room temperature for 17 h. The reaction mixture was then diluted with 350 mL of EtOAc, transferred to a separatory funnel and sequentially washed with 150 mL of 0.5 M aqueous solution of citric acid and 150 mL of saturated aqueous solution of NaHCO<sub>3</sub>. The organic phase was dried over MgSO<sub>4</sub>, filtered, and concentrated under reduced pressure. This product was exposed to high vacuum for 1 hour, and then subjected to the removal of the Boc group in a manner described above. To the white powder obtained after extensive drying of the crude deprotection product at high vacuum were added HOBt·H<sub>2</sub>O (1.01 g, 6.56 mmol, 1.1 equiv.), EDC·HCl (1.26 g, 6.56 mmol, 1.1 equiv.), and Boc-D-Val-OH (1.43 g, 6.56 mmol, 1.1 equiv.), the mixture was suspended in dry DCM (30 mL, 0.2 M), and triethylamine (1.66 mL, 11.93 mmol, 2.0 equiv.) was added in one portion. Subsequent coupling, work-up, and Boc removal were carried out in a manner analogous to the one described above. To the dry deprotection product thus obtained were added

HOBt·H<sub>2</sub>O (1.01 g, 6.56 mmol, 1.1 equiv.), EDC·HCl (1.26 g, 6.56 mmol, 1.1 equiv.), and Boc-Pro-OH (1.41 g, 6.56 mmol, 1.1 equiv.), the mixture was suspended in dry DCM (30 mL, 0.2 M), and triethylamine (1.66 mL, 11.93 mmol, 2.0 equiv.) was added in one portion. After carrying out the peptide coupling, work-up, and Boc removal procedures as described above, final peptide coupling step was performed using following amount of materials: HOBt·H<sub>2</sub>O (1.01 g, 6.56 mmol, 1.1 equiv.), EDC·HCl (1.26 g, 6.56 mmol, 1.1 equiv.), and Boc-Asp(Bn)-OH (2.12 g, 6.56 mmol, 1.1 equiv.), dry DCM (30 mL, 0.2 M), and triethylamine (1.66 mL, 11.93 mmol, 2.0 equiv.). Crude product obtained after the final peptide coupling was purified by flash column chromatography on normal phase silica gel (30% → 50% acetone/hexanes) to yield 2.30 g (52% yield) of benzyl ester **S5** as a white solid. This compound was dissolved in THF (30 mL, 0.1 M), and the atmosphere of the flask was flushed with dry N<sub>2</sub> for 5 minutes. Then Pd on charcoal (10wt%, 500 mg, 0.470 mmol, 0.15 equiv.) was added, and a balloon filled with H<sub>2</sub> was placed on the reaction flask. The resulting suspension was stirred at room temperature for 17 hours. At this point, no starting material could be detected by thin layer chromatography. The suspension was diluted with 250 mL of EtOAc and filtered through Celite. The filtrate was concentrated under reduced pressure to afford 1.82 g of the free acid **22** as a white foam (47% yield). This material was purified via the following sequence: 1) Flash purification on an automated system using a reverse phase (C18) column, eluting with the gradient 0% → 99% MeOH/H<sub>2</sub>O over 25 CV, then 100% MeOH for 2 CV; 30 mL/min, detection at 210 nm, 262 nm. 2) Flash chromatography on normal phase silica gel eluting with the gradient 95:5:1 → 85:15:1 DCM:MeOH:AcOH, followed by several cycles of azeotropic removal of acetic acid with toluene under reduced pressure on a rotary evaporator, and the final drying of the product under high vacuum for a minimum of 72 h. White powder (1.61 g, 41% yield).

<sup>1</sup>H NMR (500 MHz, CDCl<sub>3</sub>, *J* in Hz) δ 7.61 (d, *J* = 8.5, 1H), 7.56 (d, *J* = 7.9, 1H), 7.50 (d, *J* = 7.4, 1H), 5.66 (d, *J* = 9.5, 1H), 4.86 (td, *J* = 11.1, 4.1, 1H), 4.77 (d, *J* = 7.2, 1H), 4.60 – 4.54 (m, 1H), 4.41 (dd, *J* = 8.5, 5.4, 1H), 4.27 (dd, *J* = 7.4, 3.5, 1H), 3.96 (t, *J* = 8.9, 1H), 3.88 (dd, *J* = 17.3, 9.1, 1H), 3.69 (s, 3H), 3.08 (dd, *J* = 17.5, 11.5, 1H), 2.77 (dd, *J* = 17.5, 4.3, 1H), 2.60 (dd, *J* = 11.2, 5.1, 1H), 2.34 – 2.23 (m, 1H), 2.10 (dq, *J* = 13.4, 6.8, 1H), 2.05 – 1.96 (m, 1H), 1.93 – 1.82 (m, 1H), 1.82 – 1.71 (m, 2H), 1.58 – 1.42 (m, 3H), 1.39 (s, 9H), 0.93 (d, *J* = 6.9, 3H), 0.89 – 0.80 (m, 12H), 0.69 (d, *J* = 6.9, 3H); <sup>13</sup>C NMR (126 MHz, CDCl<sub>3</sub>) δ 175.0, 174.8, 173.1, 172.2, 171.8, 171.5, 155.1, 80.4, 60.2, 59.7, 57.9, 52.3, 52.1, 47.8, 39.5, 37.6, 31.0, 30.7, 28.4, 26.8, 24.8, 24.2, 22.9, 21.9, 19.8, 19.0, 17.9, 16.4; FTIR (cm<sup>-1</sup>) 3306, 2962, 1711, 1690, 1634, 1516, 1436, 1294, 1212, 1160, 1004; UPLC-MS (ESI) *m/z* 656.44 (calculated for C<sub>31</sub>H<sub>53</sub>N<sub>5</sub>O<sub>10</sub> [M + H<sup>+</sup>] = 656.38); TLC R<sub>f</sub> = 0.64 (85:15:1 DCM:MeOH:AcOH). [α]<sub>D</sub><sup>20</sup> = -159.7 (c = 5.225, CHCl<sub>3</sub>).

The enantiomer of the catalyst, *ent*-**22**, was prepared in an analogous fashion, using following monomers and reagents:

Boc-D-Val-OMe (1.62 g, 7.00 mmol, 1.0 equiv.), Boc-D-Leu-OH·H<sub>2</sub>O (1.92 g, 7.7 mmol, 1.1 equiv.), Boc-Val-OH (1.67g, 7.7 mmol, 1.1 equiv.), Boc-D-Pro-OH (1.66 g, 7.7 mmol, 1.1 equiv.), Boc-D-Asp(Bn)-OH (2.49 g, 7.7 mmol, 1.1 equiv.), HOBt·H<sub>2</sub>O (1.18 g, 7.7 mmol, 1.1 equiv.), EDC·HCl (1.48 g, 7.7 mmol, 1.1 equiv.), TEA (1.95 mL, 14.0 mmol, 2.0 equiv.). White powder (2.11 g, 46%).

<sup>1</sup>H NMR (500 MHz, CDCl<sub>3</sub>, *J* in Hz) δ 7.61 (d, *J* = 8.5, 1H), 7.56 (d, *J* = 7.9, 1H), 7.50 (d, *J* = 7.4, 1H), 5.66 (d, *J* = 9.5, 1H), 4.86 (td, *J* = 11.1, 4.1, 1H), 4.77 (d, *J* = 7.2, 1H), 4.60 – 4.54 (m, 1H), 4.41 (dd, *J* = 8.5, 5.4, 1H), 4.27 (dd, *J* = 7.4, 3.5, 1H), 3.96 (t, *J* = 8.9, 1H), 3.88 (dd, *J* = 17.3, 9.1, 1H), 3.69 (s, 3H),

3.08 (dd,  $J = 17.5, 11.5$ , 1H), 2.77 (dd,  $J = 17.5, 4.3$ , 1H), 2.60 (dd,  $J = 11.2, 5.1$ , 1H), 2.34 – 2.23 (m, 1H), 2.10 (dq,  $J = 13.4, 6.8$ , 1H), 2.05 – 1.96 (m, 1H), 1.93 – 1.82 (m, 1H), 1.82 – 1.71 (m, 2H), 1.58 – 1.42 (m, 3H), 1.39 (s, 9H), 0.93 (d,  $J = 6.9$ , 3H), 0.89 – 0.80 (m, 12H), 0.69 (d,  $J = 6.9$ , 3H);  $^{13}\text{C}$  NMR (126 MHz,  $\text{CDCl}_3$ )  $\delta$  175.0, 174.7, 173.1, 172.2, 171.8, 171.5, 155.1, 80.3, 60.2, 59.7, 57.9, 52.3, 52.1, 47.8, 39.5, 37.5, 31.0, 30.7, 28.4, 26.8, 24.8, 24.2, 22.9, 21.9, 19.7, 18.9, 17.9, 16.5; FTIR ( $\text{cm}^{-1}$ ) 3306, 2963, 1634, 1516, 1437, 1367, 1293, 1249, 1211, 1159; UPLC-MS (ESI)  $m/z$  656.47 (calculated for  $\text{C}_{31}\text{H}_{53}\text{N}_5\text{O}_{10}$   $[\text{M} + \text{H}^+] = 656.38$ ); TLC  $R_f = 0.64$  (85:15:1DCM:MeOH:AcOH).  $[\alpha]_{\text{D}}^{20} = +147.5$  ( $c = 4.407$ ,  $\text{CHCl}_3$ ).

## F. General Procedure for the Peptide Catalyzed Oxidation of 2,3-Disubstituted Indoles.

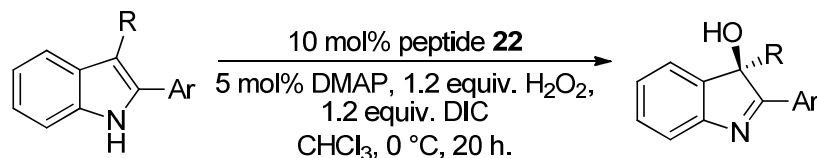

The oxidation of indoles was carried out in ¼-dram or 2-dram glass vials mounted to a cryogenic cooler with temperature control of  $\pm 0.1$  °C. Reactions were set up on the benchtop without exclusion of air or moisture. In a typical experiment, indole (0.1 mmol) was dissolved in 890  $\mu\text{L}$  of chloroform (for deviations from the standard concentration see section G) and peptide **22** was added as a chloroform solution (typically 100  $\mu\text{L}$  of 0.1 M solution, 0.01 mmol). To this solution was added a chloroform solution of *N,N*-dimethyl-4-aminopyridine (typically 10  $\mu\text{L}$  of 0.5 M solution, 5  $\mu\text{mol}$ ), followed by 12.2  $\mu\text{L}$  of aqueous 30% hydrogen peroxide (0.12 mmol). The biphasic mixture was stirred at 0 °C for 5 minutes, and the reaction was initiated by the addition 18.6  $\mu\text{L}$  of diisopropylcarbodiimide (0.12 mmol). After 20 hours, the reaction mixture was diluted with 2.0 mL of chloroform and directly purified by flash chromatography or preparative TLC.

Racemic standards for the indole oxidation products were prepared by reacting the indole with 4.0 equiv. of peracetic acid ( $\text{CH}_3\text{CO}_3\text{H}$ ) in chloroform (typically 0.1 M) at room temperature for 6-10 h. Standards were purified without previous workup in a manner analogous to that for the peptide catalyzed reactions.

## G. Analytical Data for Indole Oxidation Products.

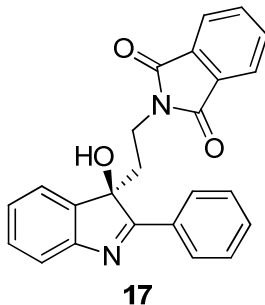

**(R)-3-Hydroxy-3-(2-*N,N*-phthaloylaminoethyl)-2-phenyl-3*H*-indole (17).** Purified by preparative TLC (50% EtOAc/Hex). Compound isolated as a mixture of conformers. White foam, 9.6 mg, 59% yield.  $^1\text{H NMR}$  (500 MHz,  $\text{CDCl}_3$ ,  $J$  in Hz)  $\delta$  8.27 – 8.15 (m, 2H), 7.72 – 7.65 (m, 2H), 7.65 – 7.58 (m, 2H), 7.52 (d,  $J = 6.6$ , 1H), 7.48 (d,  $J = 7.6$ , 1H), 7.41 (dd,  $J = 13.2$ , 5.9, 1H), 7.36 (dd,  $J = 13.8$ , 6.2, 2H), 7.32 – 7.27 (m, 1H), 7.19 (t,  $J = 7.4$ , 1H), 3.58 – 3.48 (m, 1H), 3.44 – 3.35 (m, 1H), 2.82 – 2.62 (m, 2H), 2.52 – 2.43 (m, 1H);  $^{13}\text{C NMR}$  (126 MHz,  $\text{CDCl}_3$ )  $\delta$  179.0, 167.9, 153.05, 140.2, 133.9, 132.1, 131.8, 131.6, 130.4, 128.7, 128.6, 126.8, 123.2, 122.6, 121.6, 86.0, 36.1, 33.3; **FTIR** ( $\text{cm}^{-1}$ ) 3469, 1772, 1704, 1536, 1444, 1396, 1369, 1265, 1026; **UPLC-MS** (ESI)  $m/z$  383.19 (calculated for  $\text{C}_{24}\text{H}_{18}\text{N}_2\text{O}_3$  [ $\text{M} + \text{H}^+$ ] = 383.13); **TLC**  $R_f = 0.57$  (50% EtOAc/Hex); **Chiral HPLC analysis**: 77:23 er, performed on Chiralcel OD-H (Daicel, 4.6 mm  $\times$  250 mm, 5  $\mu\text{m}$ , 20  $^\circ\text{C}$ ), eluting at 0.20 mL/min with 80:20 hexanes/ethanol. Retention times:  $t_{\text{minor}} = 35.0$  min,  $t_{\text{major}} = 37.4$  min;  $[\alpha]_{546\text{ nm}}^{20\text{ }^\circ\text{C}} = -17.1$  ( $c = 0.164$ ,  $\text{CHCl}_3$ ).

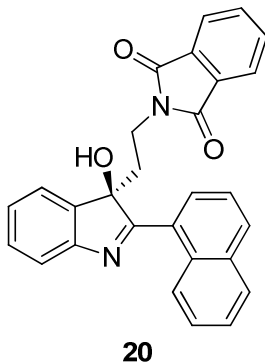

**(R)-3-Hydroxy-3-(2-*N,N*-phthaloylaminoethyl)-2-(1-naphthyl)-3*H*-indole (20).** Purified by preparative TLC (40% EtOAc/Hex). White solid, 14.9 mg, 57% yield. Product was recrystallized by slow evaporation from 95:5 2-propanol/ethanol mixture; white crystals, 11.9 mg, 45% yield.  $^1\text{H NMR}$  (500 MHz,  $\text{CDCl}_3$ ,  $J$  in Hz)  $\delta$  9.08 (d,  $J = 8.6$ , 1H), 8.53 (dd,  $J = 7.3$ , 1.1, 1H), 7.93 (d,  $J = 8.2$ , 1H), 7.85 (d,  $J = 7.8$ , 1H), 7.66 – 7.62 (m, 3H), 7.61 – 7.56 (m, 3H), 7.56 – 7.48 (m, 3H), 7.33 (td,  $J = 7.6$ , 1.1, 1H), 7.18 (td,  $J = 7.5$ , 0.9, 1H), 3.71 – 3.63 (m, 1H), 3.56 – 3.46 (m, 1H), 2.77 (s, 1H), 2.67 – 2.58 (m, 1H), 2.34 (ddd,  $J = 13.8$ , 7.8, 5.9, 1H);  $^{13}\text{C NMR}$  (126 MHz,  $\text{CDCl}_3$ )  $\delta$  179.6, 168.0, 153.6, 139.1, 134.4, 133.9, 132.0, 131.7, 131.7, 130.4, 129.3, 128.7, 128.3, 127.8, 126.9, 126.8, 126.3, 124.9, 123.2, 122.7, 122.0, 87.5, 35.6, 33.8; **FTIR** ( $\text{cm}^{-1}$ ) 3352, 2943, 1764, 1698, 1567, 1507, 1401, 1339, 1273, 1033; **UPLC-MS** (ESI)  $m/z$  433.20 (calculated for  $\text{C}_{28}\text{H}_{20}\text{N}_2\text{O}_3$  [ $\text{M} + \text{H}^+$ ] = 433.15); **TLC**  $R_f = 0.45$  (40% EtOAc/Hex); **Chiral HPLC analysis**: 94:6er (>98:2 er after recrystallization), performed on Chiralcel OD (Daicel, 4.6 mm  $\times$  250 mm,

10  $\mu\text{m}$ , 20  $^{\circ}\text{C}$ ), eluting at 0.50 mL/min with 90:10 hexanes/ethanol. Retention times:  $t_{\text{major}} = 148.0$  min,  $t_{\text{minor}} = 222.2$  min;  $[\alpha]_{546\text{ nm}}^{20\text{ }^{\circ}\text{C}} = -174.8$  ( $c = 0.078$ ,  $\text{CHCl}_3$ ).

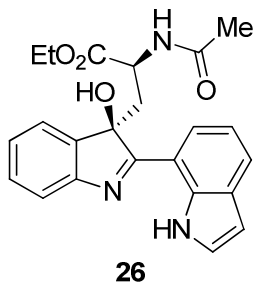

**(2'S,3R)-3-Hydroxy-3-(2-N-acetylamino-2-ethoxycarbonyl-ethyl)-2-(7-indolyl)-3H-indole** (26).

Purified by column chromatography on silica gel (60% EtOAc/Hex). Yellow foam, 586.0 mg, 73% yield.

**$^1\text{H}$  NMR** (400 MHz,  $\text{CDCl}_3$ ,  $J$  in Hz)  $\delta$  11.12 (s, 1H), 8.16 (d,  $J = 7.5$ , 1H), 7.85 (d,  $J = 7.8$ , 1H), 7.63 (d,  $J = 7.6$ , 1H), 7.53 (d,  $J = 7.3$ , 1H), 7.46 (td,  $J = 7.6$ , 1.1 Hz, 1H), 7.41 – 7.37 (m, 1H), 7.31 (t,  $J = 7.4$ , 1H), 7.24 (t,  $J = 7.7$ , 1H), 6.65 – 6.61 (m, 1H), 5.02 (d,  $J = 8.5$ , 1H), 4.07 (td,  $J = 9.0$ , 3.5, 1H), 3.96 (dq,  $J = 10.8$ , 7.1, 1H), 3.83 (dq,  $J = 10.7$ , 7.1, 1H), 3.03 (dd,  $J = 14.2$ , 3.5, 1H), 2.72 – 2.64 (m, 2H), 1.17 – 1.08 (m, 6H);  **$^{13}\text{C}$  NMR** (101 MHz,  $\text{CDCl}_3$ )  $\delta$  179.1, 171.6, 169.6, 153.6, 139.1, 134.7, 130.7, 129.1, 126.6, 125.4, 125.3, 123.5, 122.6, 121.2, 119.5, 115.4, 102.9, 86.1, 61.7, 48.8, 41.7, 22.0, 14.0; **FTIR** ( $\text{cm}^{-1}$ ) 3380, 2984, 1731, 1657, 1522, 1433, 1372, 1335, 1266, 1212, 1059; **UPLC-MS** (ESI)  $m/z$  406.23 (calculated for  $\text{C}_{23}\text{H}_{23}\text{N}_3\text{O}_4$  [ $\text{M} + \text{H}^+$ ] = 406.17); **TLC**  $R_f = 0.35$  (70% EtOAc/Hex).  $[\alpha]_{546\text{ nm}}^{20\text{ }^{\circ}\text{C}} = +89.5$  ( $c = 0.140$ ,  $\text{CHCl}_3$ ).

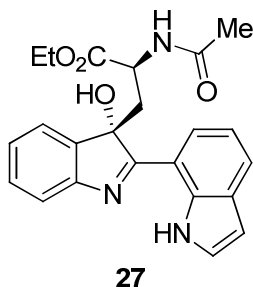

**(2'S,3S)-3-Hydroxy-3-(2-N-acetylamino-2-ethoxycarbonyl-ethyl)-2-(7-indolyl)-3H-indole** (27).

Purified by column chromatography on silica gel (60% EtOAc/Hex). White foam, 80.3 mg, 10% yield.

**$^1\text{H}$  NMR** (500 MHz,  $\text{CDCl}_3$ ,  $J$  in Hz)  $\delta$  11.17 (s, 1H), 8.19 (d,  $J = 7.6$ , 1H), 7.85 (d,  $J = 7.8$ , 1H), 7.63 (d,  $J = 7.6$ , 1H), 7.57 (d,  $J = 7.3$ , 1H), 7.45 (t,  $J = 8.0$ , 1H), 7.42 – 7.39 (m, 1H), 7.28 (t,  $J = 7.4$ , 1H), 7.24 (t,  $J = 7.7$ , 1H), 6.67 – 6.62 (m, 1H), 6.33 (d,  $J = 6.3$ , 1H), 4.63 – 4.52 (m, 1H), 3.97 – 3.90 (m, 1H), 3.86 – 3.77 (m, 1H), 3.37 (s, 1H), 2.86 (dd,  $J = 14.8$ , 8.9, 1H), 2.46 (dd,  $J = 14.7$ , 3.5, 1H), 1.69 (s, 3H), 1.09 (t,  $J = 7.1$ , 3H);  **$^{13}\text{C}$  NMR** (126 MHz,  $\text{CDCl}_3$ )  $\delta$  179.9, 171.4, 170.3, 153.6, 139.2, 135.1, 130.6, 129.1, 126.3, 125.5, 125.3, 124.3, 123.4, 121.3, 119.5, 114.8, 102.9, 86.7, 61.8, 50.4, 41.1, 22.8, 14.0; **FTIR** ( $\text{cm}^{-1}$ ) 3383, 3351, 2974, 2924, 2851, 1745, 1641, 1524, 1451, 1267, 1208, 1061; **UPLC-MS** (ESI)  $m/z$  406.22 (calculated for  $\text{C}_{23}\text{H}_{23}\text{N}_3\text{O}_4$  [ $\text{M} + \text{H}^+$ ] = 406.17); **TLC**  $R_f = 0.25$  (70% EtOAc/Hex);  $[\alpha]_{546\text{ nm}}^{20\text{ }^{\circ}\text{C}} = -51.4$  ( $c = 0.006$ ,  $\text{CHCl}_3$ ).

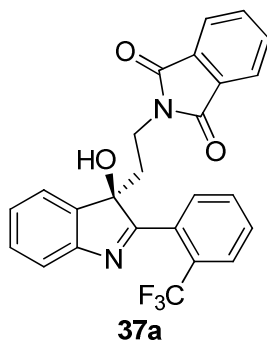

**(R)-3-Hydroxy-3-(2-*N,N*-phthaloylaminoethyl)-2-(2-trifluoromethylphenyl)-3*H*-indole (37a).** The concentration of the indole in this reaction was set to 0.5 M. Purified by column chromatography on silica gel (35% EtOAc/Hex). White foam, 83.4 mg, 93% yield.  $^1\text{H NMR}$  (500 MHz,  $\text{CDCl}_3$ ,  $J$  in Hz)  $\delta$  8.06 (d,  $J = 7.6$ , 1H), 7.83 (d,  $J = 7.8$ , 1H), 7.81 – 7.76 (m, 2H), 7.72 – 7.67 (m, 2H), 7.66 – 7.61 (m, 2H), 7.59 (d,  $J = 7.6$ , 2H), 7.42 (td,  $J = 7.6$ , 1.2, 1H), 7.32 (td,  $J = 7.5$ , 1.0, 1H), 3.82 – 3.69 (m, 2H), 2.90 (s, 1H), 2.29 (ddd,  $J = 13.9$ , 9.5, 6.6, 1H), 2.16 – 2.06 (m, 1H);  $^{13}\text{C NMR}$  (126 MHz,  $\text{CDCl}_3$ )  $\delta$  179.4, 168.3, 153.0, 139.2, 134.2, 132.3 (q,  $J = 1.7$ ), 132.2, 131.8, 130.5, 130.0, 130.0, 129.4 (q,  $J = 30.8$ ), 127.5, 124.1 (q,  $J = 273.7$ ), 123.5, 123.2, 122.3, 87.0, 34.5, 33.2;  $^{19}\text{F NMR}$  (376 MHz,  $\text{CDCl}_3$ )  $\delta$  -57.0; **FTIR** ( $\text{cm}^{-1}$ ) 3470, 2924, 1772, 1704, 1579, 1522, 1446, 1398, 1369, 1309, 1130, 1113, 1034; **UPLC-MS** (ESI)  $m/z$  451.14 (calculated for  $\text{C}_{25}\text{H}_{17}\text{F}_3\text{N}_2\text{O}_3[\text{M} + \text{H}^+] = 451.12$ ); **TLC**  $R_f = 0.45$  (40% EtOAc/Hex); **Chiral HPLC analysis**: 94:6 er, performed on Chiralpak IA (Daicel, 4.6 mm  $\times$  250 mm, 5  $\mu\text{m}$ , 20  $^\circ\text{C}$ ), eluting at 0.50 mL/min with 80:20 hexanes/isopropanol. Retention times:  $t_{\text{minor}} = 22.6$  min,  $t_{\text{major}} = 33.3$  min;  $[\alpha]_{546\text{ nm}}^{20\text{ }^\circ\text{C}} = -14.5$  ( $c = 3.950$ ,  $\text{CHCl}_3$ ).

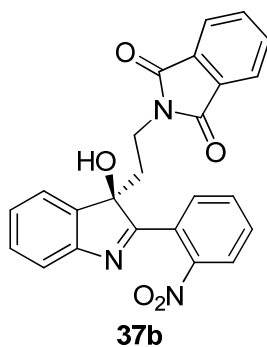

**(R)-3-Hydroxy-3-(2-*N,N*-phthaloylaminoethyl)-2-(2-nitrophenyl)-3*H*-indole (37b).** The concentration of the indole in this reaction was set to 0.5 M. Purified by preparative TLC (15% EtOAc/DCM). Yellow foam, 29.2 mg, 78% yield.  $^1\text{H NMR}$  (500 MHz,  $\text{CDCl}_3$ ,  $J$  in Hz)  $\delta$  8.07 (d,  $J = 8.2$ , 1H), 8.01 (d,  $J = 7.5$ , 1H), 7.83 – 7.75 (m, 3H), 7.72 – 7.68 (m, 2H), 7.67 – 7.62 (m, 2H), 7.55 (d,  $J = 7.6$ , 1H), 7.41 (t,  $J = 7.6$ , 1H), 7.33 (t,  $J = 7.4$ , 1H), 3.69 – 3.58 (m, 2H), 2.93 (s, 1H), 2.45 – 2.36 (m, 1H), 2.18 – 2.08 (m, 1H);  $^{13}\text{C NMR}$  (126 MHz,  $\text{CDCl}_3$ )  $\delta$  179.3, 168.2, 152.8, 149.1, 139.2, 134.2, 133.6, 132.2, 130.9, 130.5, 130.5, 129.0, 127.7, 125.1, 123.4, 123.2, 122.2, 87.6, 34.7, 33.1; **FTIR** ( $\text{cm}^{-1}$ ) 3453, 3058, 1772, 1704, 1614, 1529, 1445, 1398, 1368, 1265, 1188; **UPLC-MS** (ESI)  $m/z$  428.13 (calculated for  $\text{C}_{24}\text{H}_{17}\text{N}_3\text{O}_5[\text{M} + \text{H}^+] = 428.12$ ); **TLC**  $R_f = 0.45$  (15% EtOAc/DCM); **Chiral HPLC analysis**: 89:11 er, performed on Chiralcel OD-H (Daicel, 4.6 mm  $\times$  250 mm, 5  $\mu\text{m}$ , 20  $^\circ\text{C}$ ), eluting at 0.20 mL/min with 80:20 hexanes/ethanol. Retention times:  $t_{\text{minor}} = 54.9$  min,  $t_{\text{major}} = 65.0$  min;  $[\alpha]_D^{20\text{ }^\circ\text{C}} = +149.0$  ( $c = 0.603$ ,  $\text{CHCl}_3$ ).



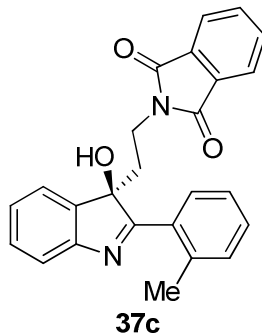

**(R)-3-Hydroxy-3-(2-*N,N*-phthaloylaminoethyl)-2-(2-methylphenyl)-3*H*-indole (37c).** Purified by preparative TLC (10% EtOAc/DCM). Compound isolated as ~5:1 mixture of conformers. White foam, 11.7 mg, 76% yield.  $^1\text{H NMR}$  (500 MHz,  $\text{CDCl}_3$ ,  $J$  in Hz)  $\delta$  8.20 (d,  $J = 7.9$ , 0.15H), 8.17 (d,  $J = 7.7$ , 0.83H), 7.74 – 7.69 (m, 2H), 7.67 – 7.62 (m, 2H), 7.56 – 7.46 (m, 2H), 7.34 – 7.28 (m, 3H), 7.26 – 7.21 (m, 1H), 7.19 – 7.12 (m, 1H), 3.62 – 3.45 (m, 2H), 2.82 (s, 1H), 2.64 (s, 3H), 2.52 (ddd,  $J = 13.9$ , 8.7, 7.0, 1H), 2.28 – 2.16 (m, 1H);  $^{13}\text{C NMR}$  (126 MHz,  $\text{CDCl}_3$ )  $\delta$  180.5, 168.0, 153.4, 139.1, 139.1, 134.0, 132.1, 131.9, 131.9, 130.2, 130.2, 129.2, 126.8, 125.7, 123.3, 122.7, 121.7, 87.0, 35.2, 33.2, 22.2; **FTIR** ( $\text{cm}^{-1}$ ) 3450, 3057, 2925, 1772, 1706, 1600, 1534, 1447, 1397, 1368, 1265, 1188; **UPLC-MS** (ESI)  $m/z$  397.17 (calculated for  $\text{C}_{25}\text{H}_{20}\text{N}_2\text{O}_3[\text{M} + \text{H}^+] = 397.15$ ); **TLC**  $R_f = 0.30$  (10% EtOAc/DCM); **Chiral HPLC analysis**: 88:12 er, performed on Chiralcel OJ-H (Daicel, 4.6 mm  $\times$  250 mm, 5  $\mu\text{m}$ , 20  $^\circ\text{C}$ ), eluting at 0.50 mL/min with 75:25 hexanes/ethanol. Retention times:  $t_{\text{minor}} = 23.3$  min,  $t_{\text{major}} = 68.7$  min;  $[\alpha]_{546\text{ nm}}^{20\text{ }^\circ\text{C}} = -14.7$  ( $c = 0.244$ ,  $\text{CHCl}_3$ ).

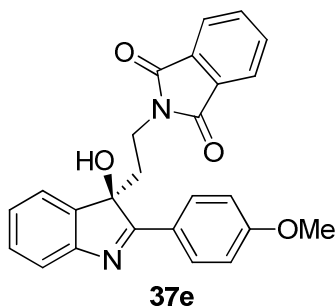

**(R)-3-Hydroxy-3-(2-*N,N*-phthaloylaminoethyl)-2-(4-methoxyphenyl)-3*H*-indole (37e).** Purified by preparative TLC (50% EtOAc/Hex). Compound isolated as ~2:1 mixture of conformers. Yellow foam, 9.0 mg, 64% yield.  $^1\text{H NMR}$  (500 MHz,  $\text{CDCl}_3$ ,  $J$  in Hz)  $\delta$  8.20 (d,  $J = 8.8$ , 0.67 H), 8.17 (d,  $J = 8.8$ , 1.29H), 7.72 – 7.66 (m, 2H), 7.66 – 7.59 (m, 2H), 7.51 (dd,  $J = 7.1$ , 3.4, 1H), 7.47 (d,  $J = 7.4$ , 0.31H), 7.42 (d,  $J = 7.6$ , 0.64H), 7.30 – 7.25 (m, 1H), 7.20 – 7.15 (m, 1H), 6.87 (d,  $J = 9.0$ , 0.58H), 6.84 (d,  $J = 9.0$ , 1.20H), 3.81 (s, 3H), 3.56 – 3.47 (m, 1H), 3.43 – 3.35 (m, 1H), 2.82 – 2.65 (m, 2H), 2.53 – 2.44 (m, 1H);  $^{13}\text{C NMR}$  (126 MHz,  $\text{CDCl}_3$ )  $\delta$  178.6, 167.8, 162.1, 152.8, 139.9, 133.8, 132.0, 130.5, 130.1, 126.0, 124.4, 123.1, 122.5, 120.8, 113.9, 85.4, 55.4, 36.3, 33.2; **FTIR** ( $\text{cm}^{-1}$ ) 3464, 2961, 1772, 1705, 1603, 1508, 1397, 1253, 1173, 1024; **UPLC-MS** (ESI)  $m/z$  413.20 (calculated for  $\text{C}_{25}\text{H}_{20}\text{N}_2\text{O}_4[\text{M} + \text{H}^+] = 413.14$ ); **TLC**  $R_f = 0.34$  (50% EtOAc/Hex); **Chiral HPLC analysis**: 75:25 er, performed on Chiralcel OJ-H (Daicel, 4.6 mm  $\times$  250 mm, 5  $\mu\text{m}$ , 20  $^\circ\text{C}$ ), eluting at 0.50 mL/min with 75:25 hexanes/ethanol. Retention times:  $t_{\text{major}} = 53.1$  min,  $t_{\text{minor}} = 78.0$  min;  $[\alpha]_{546\text{ nm}}^{20\text{ }^\circ\text{C}} = +104.4$  ( $c = 0.440$ ,  $N,N$ -DMF).

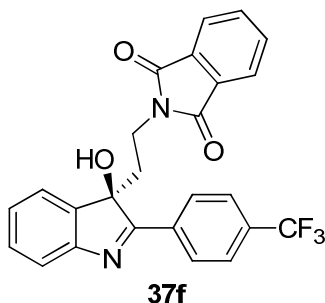

**(R)-3-Hydroxy-3-(2-*N,N*-phthaloylaminoethyl)-2-(4-trifluoromethylphenyl)-3*H*-indole (37f).** The concentration of the indole in this reaction was set to 0.5 M. Purified by preparative TLC (40% EtOAc/Hex). Compound isolated as ~2.5:1 mixture of conformers. White foam, 24.3 mg, 69% yield. <sup>1</sup>H NMR (500 MHz, CDCl<sub>3</sub>, *J* in Hz) δ 8.20 (d, *J* = 8.1, 0.57 H), 8.13 (d, *J* = 8.1, 1.36 H), 7.76 – 7.54 (m, 4H), 7.51 – 7.38 (m, 3.28H), 7.32 (d, *J* = 7.3, 0.69H), 7.26 – 7.11 (m, 2H), 3.53 – 3.38 (m, 1H), 3.35 – 2.92 (m, 2H), 2.78 – 2.62 (m, 1H), 2.58 – 2.39 (m, 1H); <sup>13</sup>C NMR (126 MHz, CDCl<sub>3</sub>, *J* in Hz) δ 177.6, 177.5, 167.9, 167.8, 152.6, 152.5, 140.0, 140.0, 134.8, 134.7, 134.0, 132.6 (q, *J* = 32.6), 132.6 (q, *J* = 32.6), 131.9, 131.8, 130.6, 130.6, 128.7, 128.6, 127.4, 127.3, 124.0 (q, *J* = 272.0), 123.9 (q, *J* = 272.3), 123.2, 122.6, 122.0, 121.8, 85.8, 85.7, 36.0, 35.9, 33.1, 33.1; <sup>19</sup>F NMR (376 MHz, CDCl<sub>3</sub>) δ -63.1; FTIR (cm<sup>-1</sup>) 3463, 1773, 1707, 1617, 1539, 1396, 1322, 1123, 1067, 1017; UPLC-MS (ESI) *m/z* 451.15 (calculated for C<sub>25</sub>H<sub>17</sub>F<sub>3</sub>N<sub>2</sub>O<sub>3</sub>[M + H<sup>+</sup>] = 451.12); TLC *R<sub>f</sub>* = 0.42 (40% EtOAc/Hex); Chiral HPLC analysis: 72:28 er, performed on Chiralpak IA (Daicel, 4.6 mm × 250 mm, 5 μm, 20 °C), eluting at 0.50 mL/min with 80:20 hexanes/isopropanol. Retention times: *t*<sub>major</sub> = 20.2 min, *t*<sub>minor</sub> = 25.6 min; [α]<sub>546 nm</sub><sup>20 °C</sup> = -18.0 (*c* = 0.050, CHCl<sub>3</sub>).

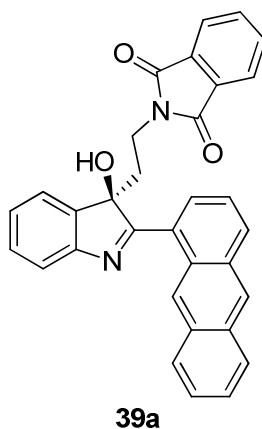

**(R)-2-(1-Anthracenyl)-3-hydroxy-3-(2-*N,N*-phthaloylaminoethyl)-3*H*-indole (39a).** Purified by column chromatography on silica gel (35% EtOAc/Hex). Yellow solid, 89.9 mg, 88% yield. Product was recrystallized by slow evaporation from DCM; yellow crystals, 72.7 mg, 71% yield. <sup>1</sup>H NMR (500 MHz, CDCl<sub>3</sub>, *J* in Hz) δ 9.82 (s, 1H), 8.56 (d, *J* = 7.1, 1H), 8.34 (s, 1H), 8.13 – 8.07 (m, 1H), 8.03 (d, *J* = 8.6, 1H), 7.98 – 7.93 (m, 1H), 7.70 (d, *J* = 7.6, 1H), 7.54 (d, *J* = 7.2, 1H), 7.51 – 7.45 (m, 4H), 7.43 (dd, *J* = 8.4, 7.2, 1H), 7.39 (dd, *J* = 5.5, 3.0, 2H), 7.36 (dd, *J* = 7.6, 1.2, 1H), 7.21 (t, *J* = 7.0, 1H), 3.62 (dt, *J* = 14.0, 6.9, 1H), 3.47 (dt, *J* = 14.0, 7.0, 1H), 2.90 (s, 1H), 2.66 (dt, *J* = 14.0, 6.9, 1H), 2.53 (dt, *J* = 14.0, 7.0, 1H); <sup>13</sup>C NMR (126 MHz, CDCl<sub>3</sub>) δ 179.3, 167.9, 153.7, 139.1, 133.6, 132.9, 132.4, 132.4, 131.8,

131.6, 130.4, 129.8, 129.2, 129.2, 128.8, 127.8, 127.1, 126.9, 126.7, 126.1, 125.7, 124.2, 122.8, 122.6, 122.1, 87.7, 35.9, 33.5; **FTIR** ( $\text{cm}^{-1}$ ) 3424, 3046, 2944, 1762, 1696, 1616, 1517, 1395, 1348, 1198, 1019; **UPLC-MS** (ESI)  $m/z$  483.16 (calculated for  $\text{C}_{32}\text{H}_{22}\text{N}_2\text{O}_3[\text{M} + \text{H}^+] = 483.16$ ); **TLC**  $R_f = 0.43$  (40% EtOAc/Hex); **Chiral HPLC analysis**: 95:5 er (>99:1 after recrystallization), performed on Chiralcel OD-H (Daicel, 4.6 mm  $\times$  250 mm, 5  $\mu\text{m}$ , 20  $^\circ\text{C}$ ), eluting at 0.50 mL/min with 85:15 hexanes/ethanol. Retention times:  $t_{\text{minor}} = 27.8$  min,  $t_{\text{major}} = 46.7$  min;  $[\alpha]_{546 \text{ nm}}^{20 \text{ }^\circ\text{C}} = -18.4$  ( $c = 3.380$ ,  $N,N$ -DMF) (recrystallized material).

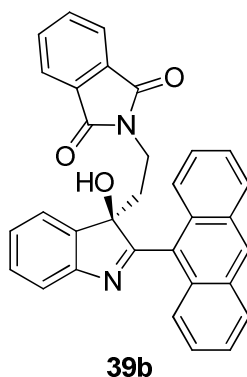

**(R)-2-(9-Anthracenyl)-3-hydroxy-3-(2-*N,N*-phthaloylaminoethyl)-3H-indole (39b)**. Purified by preparative TLC (40% EtOAc/Hex). White solid, 1.2 mg, 7% yield.  $^1\text{H NMR}$  (500 MHz,  $\text{CDCl}_3$ ,  $J$  in Hz)  $\delta$  8.50 (s, 1H), 8.07 – 8.98 (m, 3H), 7.97 – 7.85 (m, 1H), 7.75 (dd,  $J = 11.2, 7.5$ , 2H), 7.68 – 7.59 (m, 4H), 7.54 (td,  $J = 7.7, 1.1$ , 1H), 7.51 – 7.37 (m, 5H), 4.00 – 3.91 (m, 1H), 3.83 – 3.76 (m, 1H), 2.22 – 2.13 (m, 1H), 2.03 – 1.94 (m, 1H);  $^{13}\text{C NMR}$  (126 MHz,  $\text{CDCl}_3$ )  $\delta$  183.7, 168.3, 153.2, 139.7, 134.1, 133.9, 132.0, 131.5, 130.4, 129.1, 128.5, 127.8, 127.3, 123.7, 123.5, 122.2, 88.7, 35.8, 33.1; **FTIR** ( $\text{cm}^{-1}$ ) 3451, 3051, 2923, 2852, 1770, 1700, 1574, 1520, 1444, 1397, 1366, 1264, 1088; **UPLC-MS** (ESI)  $m/z$  483.17 (calculated for  $\text{C}_{32}\text{H}_{22}\text{N}_2\text{O}_3[\text{M} + \text{H}^+] = 483.16$ ); **TLC**  $R_f = 0.40$  (7% EtOAc/DCM); **Chiral HPLC analysis**: 84:16 er, performed on Chiralcel OD-H (Daicel, 4.6 mm  $\times$  250 mm, 5  $\mu\text{m}$ , 20  $^\circ\text{C}$ ), eluting at 0.50 mL/min with 85:15 hexanes/ethanol. Retention times:  $t_{\text{minor}} = 30.7$  min,  $t_{\text{major}} = 50.2$  min;  $[\alpha]_{546 \text{ nm}}^{20 \text{ }^\circ\text{C}} = +830.8$  ( $c = 0.035$ ,  $\text{CHCl}_3$ ).

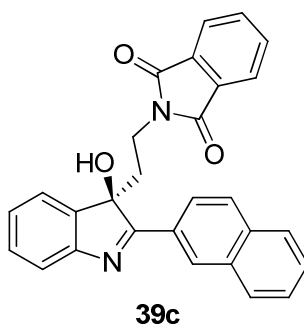

**(R)-3-Hydroxy-2-(2-naphthyl)-3-(2-*N,N*-phthaloylaminoethyl)-3H-indole (39c)**. Purified by preparative TLC (40% EtOAc/Hex). Compound isolated as ~2:1 mixture of conformers. White solid, 14.1 mg, 74% yield.  $^1\text{H NMR}$  (500 MHz,  $\text{CDCl}_3$ ,  $J$  in Hz)  $\delta$  8.60 (s, 0.31 H), 8.53 (s, 0.65 H), 8.14 (d,  $J = 8.6$ , 0.32 H), 8.08 (d,  $J = 8.6$ , 0.67 H), 7.78 (d,  $J = 8.0$ , 0.33 H), 7.70 (t,  $J = 7.0$ , 1H), 7.63 (d,  $J = 7.0$ , 1H),

7.54 (d,  $J = 8.7$ , 1H), 7.52 – 7.41 (m, 6H), 7.41 – 7.35 (m, 1H), 7.31 (d,  $J = 7.5$ , 1H), 7.21 – 7.13 (m, 1H), 7.11 (t,  $J = 7.3$ , 1H), 3.51 – 3.38 (m, 1H), 3.36 – 3.25 (m, 1H), 2.82 – 2.71 (m, 1H), 2.66 – 2.52 (m, 1H), 1.67 (brs, 1H);  $^{13}\text{C NMR}$  (126 MHz,  $\text{CDCl}_3$ )  $\delta$  179.0, 178.9, 167.9, 167.8, 153.0, 152.9, 140.2, 134.7, 134.7, 133.7, 133.7, 132.9, 132.8, 131.8, 130.3, 129.5, 129.5, 129.1, 129.0, 128.3, 128.2, 127.8, 127.7, 127.6, 126.7, 126.6, 126.5, 126.4, 124.9, 124.8, 123.0, 123.0, 122.5, 121.5, 121.4, 85.9, 85.8, 36.3, 36.3, 33.3; **FTIR** ( $\text{cm}^{-1}$ ) 3457, 2924, 1771, 1705, 1532, 1396, 1367, 1190, 1021; **UPLC-MS** (ESI)  $m/z$  433.17 (calculated for  $\text{C}_{28}\text{H}_{20}\text{N}_2\text{O}_3[\text{M} + \text{H}^+] = 433.15$ ); **TLC**  $R_f = 0.31$  (10% EtOAc/DCM); **Chiral HPLC analysis**: 67:33 er, performed on Chiralcel OD-H (Daicel, 4.6 mm  $\times$  250 mm, 5  $\mu\text{m}$ , 20  $^\circ\text{C}$ ), eluting at 0.50 mL/min with 85:15 hexanes/ethanol. Retention times:  $t_{\text{minor}} = 18.7$  min,  $t_{\text{major}} = 22.9$  min;  $[\alpha]_{546\text{ nm}}^{20\text{ }^\circ\text{C}} = -24.4$  ( $c = 1.000$ ,  $\text{CHCl}_3$ ).

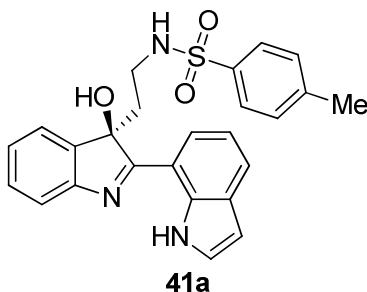

**(R)-3-Hydroxy-3-(2-N-(4-toluenesulfonyl)aminoethyl)-2-(7-indolyl)-3H-indole (41a)**. Purified by preparative TLC (15% EtOAc/DCM). Yellow foam, 11.1 mg, 77% yield.  $^1\text{H NMR}$  (500 MHz,  $\text{CDCl}_3$ ,  $J$  in Hz)  $\delta$  10.99 (s, 1H), 8.05 (dd,  $J = 7.5$ , 0.6, 1H), 7.83 (d,  $J = 7.8$ , 1H), 7.54 (t,  $J = 7.9$ , 3H), 7.39 (ddd,  $J = 7.7$ , 6.6, 2.2, 1H), 7.36 (dd,  $J = 3.0$ , 2.4, 1H), 7.21 (d,  $J = 7.9$ , 2H), 7.19 – 7.13 (m, 3H), 6.62 (dd,  $J = 3.1$ , 2.3, 1H), 4.91 – 4.84 (m, 1H), 2.93 – 2.83 (m, 2H), 2.68 (brs, 1H), 2.54 (ddd,  $J = 14.4$ , 8.2, 7.2, 1H), 2.43 (s, 3H), 1.89 (dt,  $J = 14.1$ , 5.8, 1H);  $^{13}\text{C NMR}$  (126 MHz,  $\text{CDCl}_3$ )  $\delta$  179.6, 152.9, 143.5, 139.1, 136.7, 134.9, 130.5, 129.9, 129.1, 127.3, 126.3, 125.6, 125.3, 124.2, 122.8, 121.2, 119.4, 114.3, 102.9, 87.5, 39.2, 38.2, 21.8; **FTIR** ( $\text{cm}^{-1}$ ) 3453, 3375, 3297, 3068, 2924, 1700, 1657, 1598, 1522, 1433, 1334, 1266, 1157, 1091; **UPLC-MS** (ESI)  $m/z$  446.16 (calculated for  $[\text{M} + \text{H}^+] = 446.15$ ); **TLC**  $R_f = 0.30$  (35% EtOAc/Hex); **Chiral HPLC analysis**: 86:14 er, performed on Chiralcel OD (Daicel, 4.6 mm  $\times$  250 mm, 10  $\mu\text{m}$ , 20  $^\circ\text{C}$ ), eluting at 0.10 mL/min with 80:20 hexanes/ethanol. Retention times:  $t_{\text{minor}} = 99.0$  min,  $t_{\text{major}} = 107.8$  min.

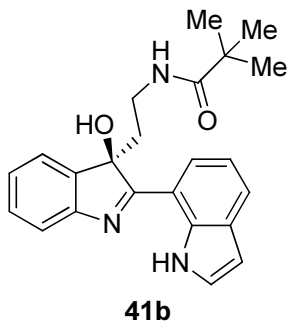

**(R)-3-Hydroxy-2-(7-indolyl)-3-(2-N-pivaloylaminoethyl)-3H-indole (41b)**. Purified by column chromatography (35% EtOAc/Hex). White foam, 10.2 mg, 87% yield.  $^1\text{H NMR}$  (500 MHz,  $\text{CDCl}_3$ ,  $J$  in Hz)  $\delta$  11.16 (s, 1H), 8.21 (d,  $J = 7.6$ , 1H), 7.85 (d,  $J = 7.8$ , 1H), 7.61 (d,  $J = 7.6$ , 1H), 7.51 (d,  $J = 7.3$ ,

1H), 7.43 (td,  $J = 7.6, 1.2$ , 1H), 7.40 – 7.38 (m, 1H), 7.28 (t,  $J = 7.4$ , 1H), 7.23 (t,  $J = 7.7$ , 1H), 6.65 – 6.62 (m, 1H), 5.76 – 5.69 (m, 1H), 3.24 – 3.12 (m, 1H), 3.00 – 2.89 (m, 2H), 2.68 – 2.57 (m, 1H), 2.30 – 2.19 (m, 1H), 0.92 (s, 9H);  $^{13}\text{C NMR}$  (126 MHz,  $\text{CDCl}_3$ )  $\delta$  180.4, 178.6, 153.2, 140.1, 135.1, 130.3, 129.2, 126.6, 125.5, 125.3, 124.3, 122.9, 121.1, 119.4, 114.8, 102.9, 87.5, 39.3, 38.5, 35.5, 27.3; **FTIR** ( $\text{cm}^{-1}$ ) 3377, 2964, 1634, 1520, 1335, 1265, 1201, 1051; **UPLC-MS** (ESI)  $m/z$  376.21 (calculated for  $\text{C}_{23}\text{H}_{25}\text{N}_3\text{O}_2[\text{M} + \text{H}^+] = 376.19$ ); **TLC**  $R_f = 0.39$  (45% EtOAc/Hex); **Chiral HPLC analysis**: 83:17 er, performed on Chiralcel OJ-H (Daicel, 4.6 mm  $\times$  250 mm, 5  $\mu\text{m}$ , 20  $^\circ\text{C}$ ), eluting at 0.20 mL/min with 90:10 hexanes/isopropanol. Retention times:  $t_{\text{major}} = 128.6$  min,  $t_{\text{minor}} = 164.5$  min;  $[\alpha]_{546\text{ nm}}^{20\text{ }^\circ\text{C}} = +49.4$  ( $c = 2.110$ ,  $\text{CHCl}_3$ ).

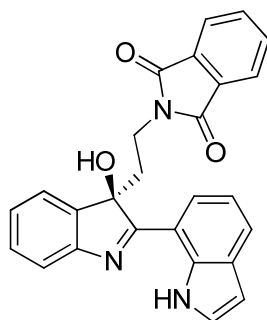

**41c**

**(R)-3-Hydroxy-2-(7-indolyl)-3-(2-N,N-phthaloylaminoethyl)-3H-indole (41c)**. Purified by preparative TLC (40% EtOAc/Hex). Yellow solid, 5.5 mg, 89% yield. Product was recrystallized by slow evaporation from 95:5 2-propanol/ethanol mixture; yellow crystals, 2.90 mg, 47% yield.  $^1\text{H NMR}$  (500 MHz,  $\text{CDCl}_3$ ,  $J$  in Hz)  $\delta$  11.03 (s, 1H), 8.10 (d,  $J = 7.5$ , 1H), 7.64 (d,  $J = 7.8$ , 1H), 7.59 (d,  $J = 7.6$ , 1H), 7.54 (d,  $J = 7.3$ , 1H), 7.51 – 7.46 (m, 4H), 7.36 (td,  $J = 7.7, 1.1$ , 1H), 7.26 – 7.24 (m, 1H), 7.21 (t,  $J = 7.4$ , 1H), 7.14 (td,  $J = 7.7, 1.8$ , 1H), 6.45 – 6.41 (m, 1H), 3.55 – 3.44 (m, 1H), 3.40 – 3.29 (m, 1H), 2.85 (t,  $J = 6.4$ , 2H), 2.55 (s, 1H);  $^{13}\text{C NMR}$  (126 MHz,  $\text{CDCl}_3$ )  $\delta$  179.1, 168.0, 153.6, 139.5, 134.8, 133.6, 131.5, 130.4, 128.9, 126.5, 125.2, 125.0, 124.1, 122.8, 122.5, 121.2, 119.4, 114.8, 102.7, 86.5, 37.5, 33.4; **FTIR** ( $\text{cm}^{-1}$ ) 3441, 3377, 3059, 2941, 1767, 1697, 1521, 1396, 1335, 1266, 1196, 1017; **UPLC-MS** (ESI)  $m/z$  422.21 (calculated for  $\text{C}_{26}\text{H}_{19}\text{N}_3\text{O}_3[\text{M} + \text{H}^+] = 422.14$ ); **TLC**  $R_f = 0.47$  (40% EtOAc/Hex); **Chiral HPLC analysis**: 82:18er (95:5 er after recrystallization), performed on Chiralcel OD-H (Daicel, 4.6 mm  $\times$  250 mm, 5  $\mu\text{m}$ , 20  $^\circ\text{C}$ ), eluting at 0.50 mL/min with 80:20 hexanes/ethanol. Retention times:  $t_{\text{minor}} = 19.2$  min,  $t_{\text{major}} = 20.8$  min;  $[\alpha]_{578\text{ nm}}^{20\text{ }^\circ\text{C}} = +136.8$  ( $c = 0.100$ ,  $\text{CHCl}_3$ ).

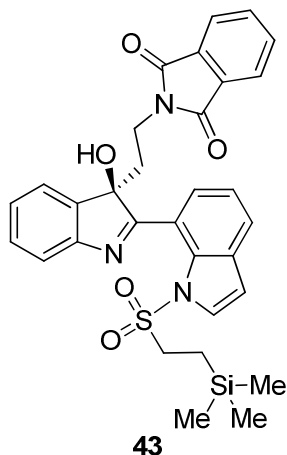

**(R)-3-Hydroxy-2-(N-(2-trimethylsilylethanesulfonyl)indol-7-yl)-3-(2-N,N-phthaloylaminoethyl)-3H-indole (43).** Purified by preparative TLC (40% EtOAc/Hex). White foam, 8.2 mg, 70% yield.  $^1\text{H NMR}$  (500 MHz,  $\text{CDCl}_3$ ,  $J$  in Hz)  $\delta$  7.81 (dd,  $J = 5.4, 3.1$ , 2H), 7.75 (dd,  $J = 7.8, 1.1$ , 1H), 7.71 – 7.67 (m, 3H), 7.61 (d,  $J = 7.3$ , 1H), 7.57 (d,  $J = 3.7$ , 1H), 7.51 (d,  $J = 7.1$ , 1H), 7.48 (t,  $J = 7.7$ , 1H), 7.43 (td,  $J = 7.5, 1.4$ , 1H), 7.38 (td,  $J = 7.5, 1.1$ , 1H), 6.77 (d,  $J = 3.7$ , 1H), 4.07 (s, 1H), 3.70 – 3.54 (m, 3H), 3.49 (td,  $J = 14.0, 4.0$ , 1H), 2.50 (ddd,  $J = 13.0, 11.4, 5.8$ , 1H), 2.21 (ddd,  $J = 12.7, 10.8, 4.6$ , 1H), 0.87 (td,  $J = 13.8, 4.2$ , 1H), 0.55 (td,  $J = 13.8, 3.7$ , 1H), 0.02 (s, 9H);  $^{13}\text{C NMR}$  (126 MHz,  $\text{CDCl}_3$ )  $\delta$  184.06, 168.2, 152.5, 140.6, 134.1, 133.2, 132.9, 132.3, 130.0, 129.7, 127.5, 125.3, 123.6, 123.5, 123.4, 123.3, 121.2, 120.4, 108.3, 88.0, 50.6, 34.7, 33.5, 9.6, -1.7; **FTIR** ( $\text{cm}^{-1}$ ) 3510, 2956, 1773, 1709, 1570, 1398, 1367, 1250, 1157, 1130, 833; **UPLC-MS** (ESI)  $m/z$  586.18 (calculated for  $[\text{M} + \text{H}^+] = 586.18$ ); **TLC**  $R_f$  = 0.40 (35% EtOAc/Hex); **Chiral HPLC analysis**: 93:7er, performed on Chiralcel OD (Daicel, 4.6 mm  $\times$  250 mm, 10  $\mu\text{m}$ , 20  $^\circ\text{C}$ ), eluting at 0.1 mL/min with 96:4 hexanes/ethanol. Retention times:  $t_{\text{major}} = 180.6$  min,  $t_{\text{minor}} = 200.3$  min;  $[\alpha]_{\text{D}}^{20} = +271.1$  ( $c = 0.100$ ,  $\text{CHCl}_3$ ).

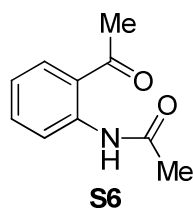

**S6.** Purified by preparative TLC (30% EtOAc/Hex). White solid, 25.0 mg, 45% yield.  $^1\text{H NMR}$  (500 MHz,  $\text{CDCl}_3$ ,  $J$  in Hz)  $\delta$  11.70 (s, 1H), 8.75 (dd,  $J = 8.5, 0.9$ , 1H), 7.90 (dd,  $J = 8.0, 1.5$ , 1H), 7.62 – 7.50 (m, 1H), 7.18 – 7.06 (m, 1H), 2.68 (s, 3H), 2.24 (s, 3H);  $^{13}\text{C NMR}$  (126 MHz,  $\text{CDCl}_3$ )  $\delta$  203.1, 169.7, 141.3, 135.4, 131.8, 122.5, 121.9, 120.9, 28.8, 25.8; **FTIR** ( $\text{cm}^{-1}$ ) 3242, 2973, 2926, 1685, 1650, 1581, 1522, 1452, 1360, 1239, 1168; **UPLC-MS** (ESI)  $m/z$  178.40 (calculated for  $[\text{M} + \text{H}^+] = 178.08$ ); **TLC**  $R_f$  = 0.44 (30% EtOAc/Hex).

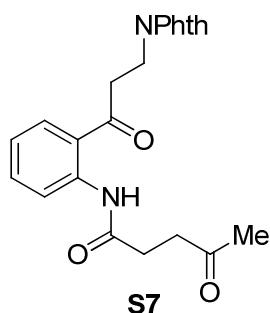

**S7.** Purified by preparative TLC (65% EtOAc/Hex). Yellow solid, 10.0 mg, 13% yield.  $^1\text{H NMR}$  (500 MHz,  $\text{CDCl}_3$ ,  $J$  in Hz)  $\delta$  11.64 (s, 1H), 8.70 (dd,  $J = 8.5, 1.0$ , 1H), 7.89 – 7.83 (m, 3H), 7.74 (dd,  $J = 5.5, 3.0$ , 2H), 7.56 – 7.50 (m, 1H), 7.12 – 7.03 (m, 1H), 4.20 – 4.09 (m, 2H), 3.54 – 3.44 (m, 2H), 2.87 (t,  $J = 6.5$ , 2H), 2.75 (t,  $J = 6.5$ , 2H), 2.24 (s, 3H);  $^{13}\text{C NMR}$  (126 MHz,  $\text{CDCl}_3$ )  $\delta$  207.1, 201.9, 171.4, 168.3, 141.2, 135.5, 134.3, 134.1, 132.3, 130.8, 123.6, 122.6, 121.1, 38.3, 33.8, 32.0, 30.2, 25.0; **FTIR** ( $\text{cm}^{-1}$ ) 3473, 2951, 1771, 1706, 1650, 1583, 1522, 1450, 1397, 1365, 1200, 910; **UPLC-MS** (ESI)  $m/z$  393.55 (calculated for  $[\text{M} + \text{H}^+] = 393.14$ ); **TLC**  $R_f = 0.62$  (65% EtOAc/Hex).

## H. X-Ray Structure of the Compound **41c** and Proof of Absolute Stereochemistry.

The absolute stereochemistry of the compound **41c** was established as *R* by X-ray crystallographic analysis. The details of the analysis are in section K, following the NMR spectra.

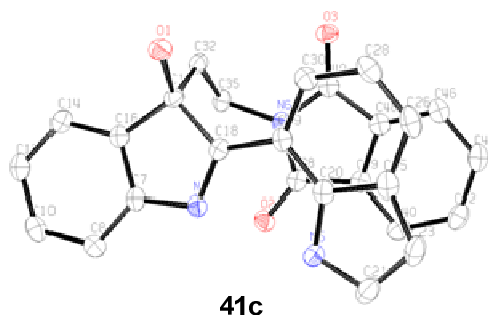

Support for the stereochemical assignment derives from the work of Movassaghi *et al.*<sup>4</sup>, who reported a crystal structure of a related indole oxidation product **S8**. This compound is identical in spectroscopic and chromatographic properties to the *minor* diastereomer **24** obtained in the matched case of the oxidation of indole **21** using peptide catalyst **22**.

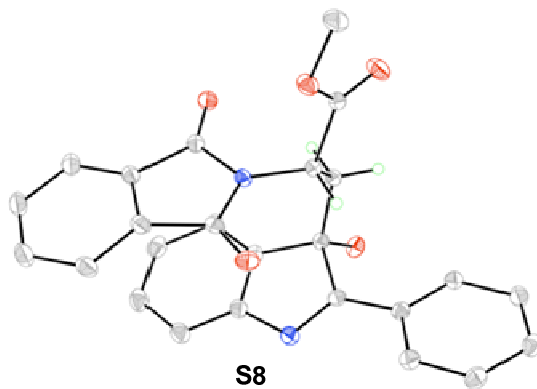



## I. Procedure for the Stereospecific Rearrangement of 3-Hydroxy-indolenines.

### (*S*)-3-(2-*N,N*-phthaloylaminoethyl)-3-(2-naphthyl)oxindole (**44**)

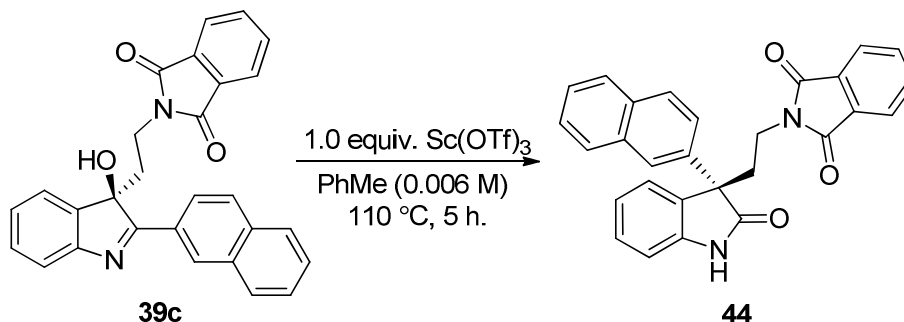

A 5-mL round-bottom flask was charged with 3-hydroxy-indolenine **39c** (7.0 mg, 0.01619 mmol, 1.0 equiv.), scandium(III) triflate (8.0 mg, 0.01619 mmol, 1.0 equiv.) and degassed toluene (2.5 mL). The flask was flushed with nitrogen, sealed, and heated in an oil bath at 110 °C for 5 hours. The resulting yellow solution was directly purified by preparative TLC eluting with 10% EtOAc/DCM. After removal of the desorption solvent (EtOAc), the 2-oxindole **44** was isolated as white solid (5.0 mg, 71% yield).

**<sup>1</sup>H NMR** (500 MHz, CDCl<sub>3</sub>, *J* in Hz) δ 7.92 (s, 1H), 7.82 (d, *J* = 1.7, 1H), 7.79 – 7.66 (m, 5H), 7.61 (dd, *J* = 5.5, 3.1, 2H), 7.54 (dd, *J* = 8.7, 2.0, 1H), 7.45 – 7.40 (m, 2H), 7.38 (d, *J* = 7.4, 1H), 7.17 (td, *J* = 7.7, 1.2, 1H), 6.99 (td, *J* = 7.6, 1.0, 1H), 6.95 (d, *J* = 7.8, 1H), 3.88 – 3.66 (m, 2H), 2.95 (dt, *J* = 15.2, 7.6, 1H), 2.87 – 2.75 (m, 1H); **<sup>13</sup>C NMR** (126 MHz, CDCl<sub>3</sub>) δ 179.6, 168.2, 140.9, 136.6, 133.9, 133.4, 132.7, 132.1, 131.9, 128.7, 128.6, 128.4, 127.6, 126.4, 126.3, 125.9, 125.6, 124.9, 123.2, 123.0, 110.5, 55.7, 34.9, 34.7; **FTIR** (cm<sup>-1</sup>) 3236, 3051, 2917, 1765, 1699, 1615, 1469, 1349, 1234; **UPLC-MS** (ESI) *m/z* 433.57 (calculated for C<sub>28</sub>H<sub>20</sub>N<sub>2</sub>O<sub>3</sub> [M + H<sup>+</sup>] = 433.15); **TLC** R<sub>f</sub> = 0.34 (10% EtOAc/DCM); **Chiral HPLC analysis**: 67:33 er, performed on Chiralcel OJ-H (Daicel, 4.6 mm × 250 mm, 5 μm, 20 °C), eluting at 0.50 mL/min with 80:20 hexanes/ethanol. Retention times: *t*<sub>minor</sub> = 64.3 min, *t*<sub>major</sub> = 84.8 min; **[α]<sub>546 nm</sub><sup>20 °C</sup>** = -24.4 (*c* = 1.0, CHCl<sub>3</sub>).

**(S)-3-(2-*N,N*-phthaloylaminoethyl)-3-(1-anthracenyl)oxindole (45)**

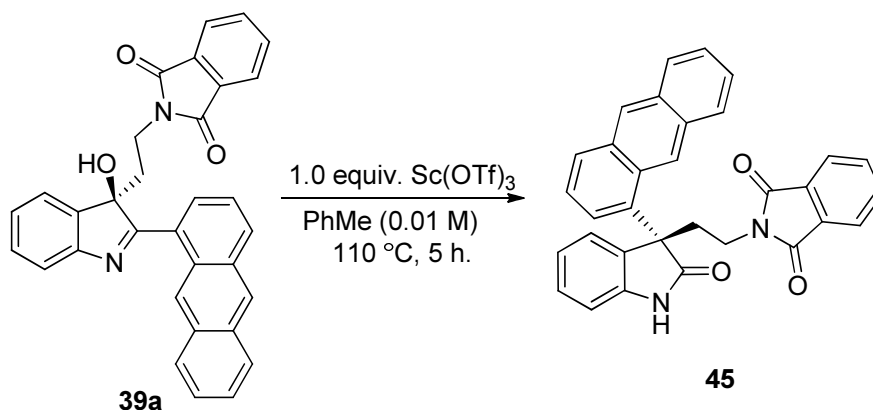

A 5-mL round-bottom flask was charged with 3-hydroxy-indolenine **39a** (19.8 mg, 0.04103 mmol, 1.0 equiv.), scandium(III) triflate (20.2 mg, 0.04103 mmol, 1.0 equiv.) and degassed toluene (4.1 mL). The flask was flushed with nitrogen, sealed, and heated in an oil bath at 110 °C for 5 hours. The resulting yellow solution was directly purified by preparative TLC eluting with 10% EtOAc/DCM. After removal of the desorption solvent (EtOAc), the 2-oxindole **45** was isolated as white solid (7.0 mg, 35% yield).

**<sup>1</sup>H NMR** (500 MHz, CDCl<sub>3</sub>, *J* in Hz) δ 8.51 (s, 1H), 8.38 (s, 1H), 8.05 (d, *J* = 7.0, 1H), 8.01 (d, *J* = 8.7, 1H), 7.91 (s, 1H), 7.88 (d, *J* = 8.3, 1H), 7.79 (dd, *J* = 5.5, 3.0, 2H), 7.68 (dd, *J* = 5.5, 3.0, 2H), 7.57 (dd, *J* = 8.4, 7.2, 1H), 7.53 (d, *J* = 8.4, 1H), 7.39 – 7.33 (m, 1H), 7.26 – 7.17 (m, 2H), 7.14 (d, *J* = 7.7, 1H), 6.95 – 6.90 (m, 1H), 6.87 (td, *J* = 7.4, 1.0, 1H), 4.02 – 3.94 (m, 1H), 3.91 – 3.83 (m, 1H), 2.96 – 2.83 (m, 2H); **<sup>13</sup>C NMR** (126 MHz, CDCl<sub>3</sub>) δ 180.6, 168.3, 140.1, 134.8, 134.1, 133.7, 133.0, 132.3, 131.7, 131.2, 130.0, 129.7, 128.9, 128.8, 127.6, 127.6, 126.6, 125.8, 125.5, 124.7, 124.2, 123.6, 123.3, 123.2, 110.5, 55.9, 36.4, 34.2; **FTIR** (cm<sup>-1</sup>) 3245, 2926, 1770, 1708, 1617, 1399, 1369; **UPLC-MS** (ESI) *m/z* 483.62 (calculated for C<sub>32</sub>H<sub>22</sub>N<sub>2</sub>O<sub>3</sub> [M + H]<sup>+</sup> = 483.16); **TLC** R<sub>f</sub> = 0.45 (10% EtOAc/DCM); **Chiral HPLC analysis**: 99:1 er, performed on Chiralcel OD-H (Daicel, 4.6 mm × 250 mm, 5 μm, 20 °C), eluting at 0.7 mL/min with 55:45 hexanes/ethanol. Retention times: *t*<sub>major</sub> = 13.8 min, *t*<sub>minor</sub> = 35.8 min; [α]<sub>546 nm</sub><sup>20 °C</sup> = -1.1 (*c* = 0.82, CHCl<sub>3</sub>).

## J. NMR Spectra.

As shown below, some of the oxidation products exhibit conformational equilibria, resulting in doubling of signals at room temperature. As shown for compound **39c**, solvent exchange in the NMR experiments reveals reversible coalescence of signals with the introduction of  $d_6$ -DMSO.

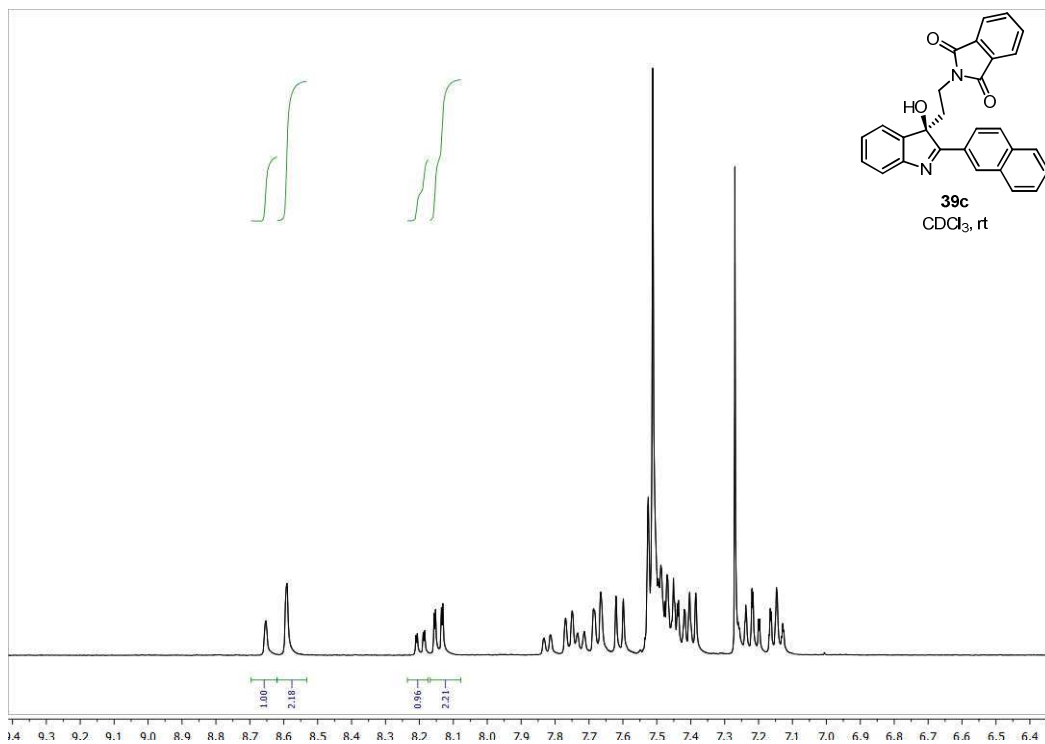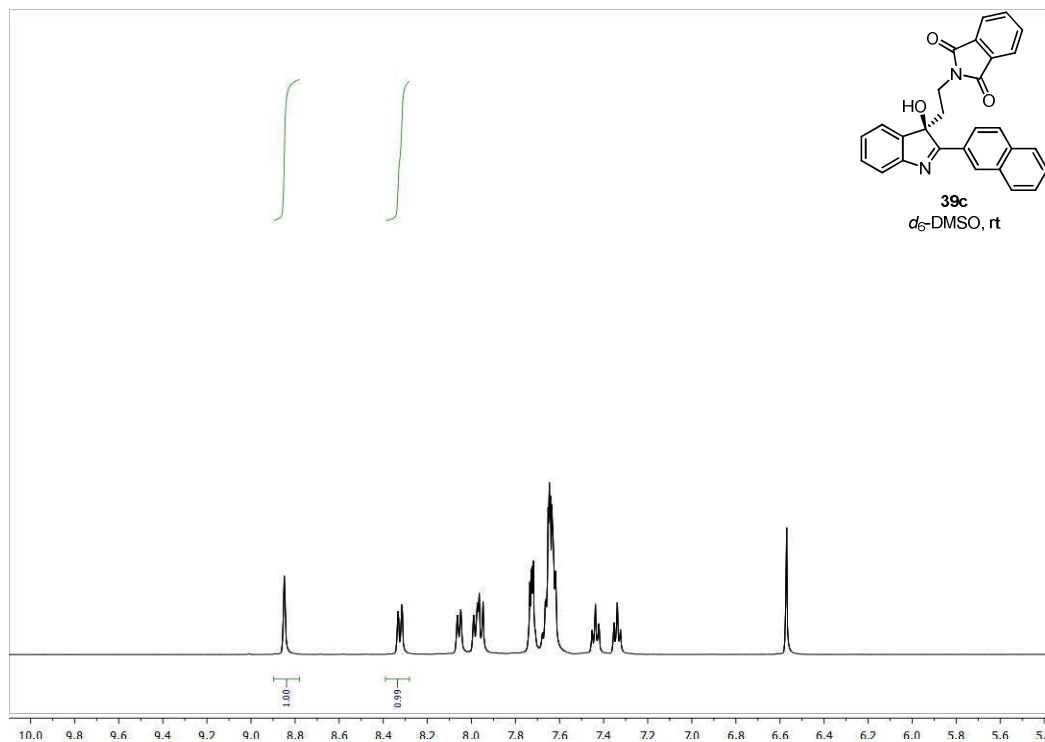

# N,N-Phthaloyl-2-iodotryptamine (S1):

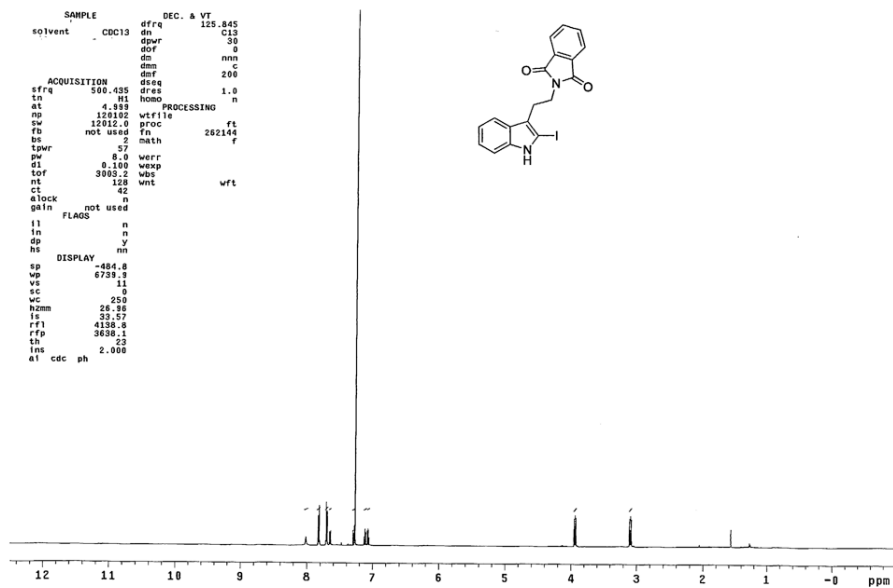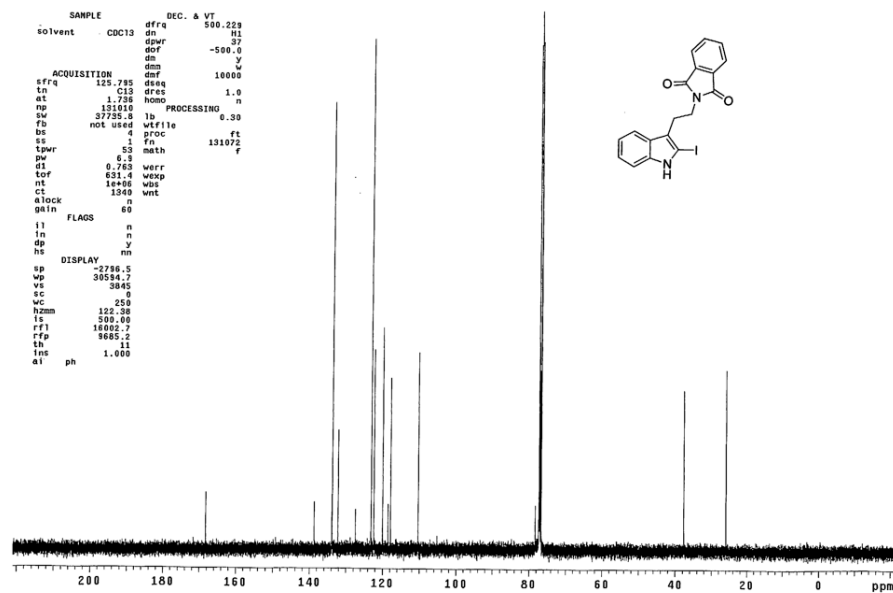

# N,N-Phthaloyl-2-phenyltryptamine (14):

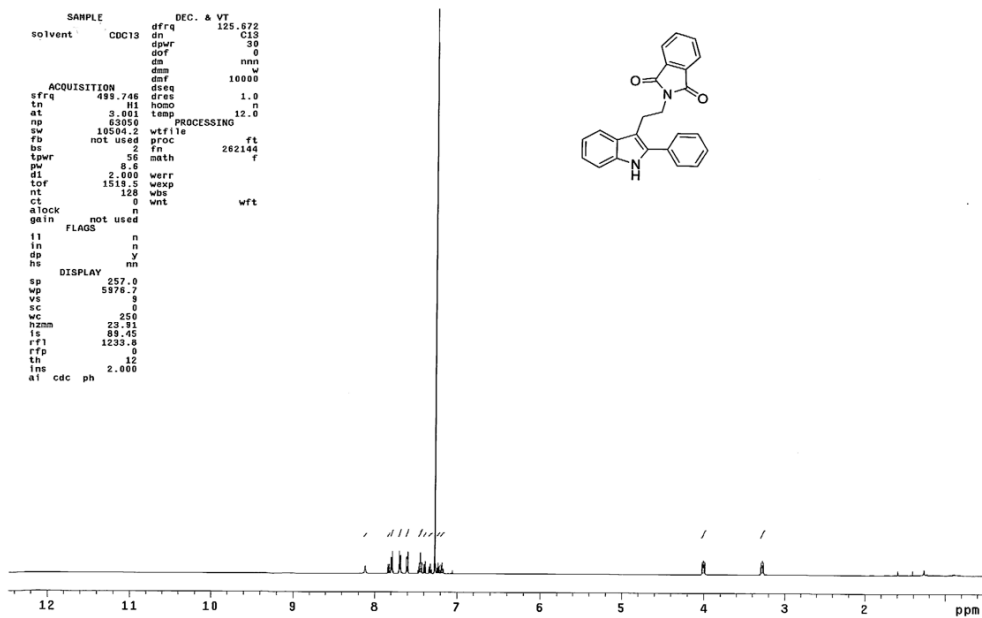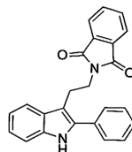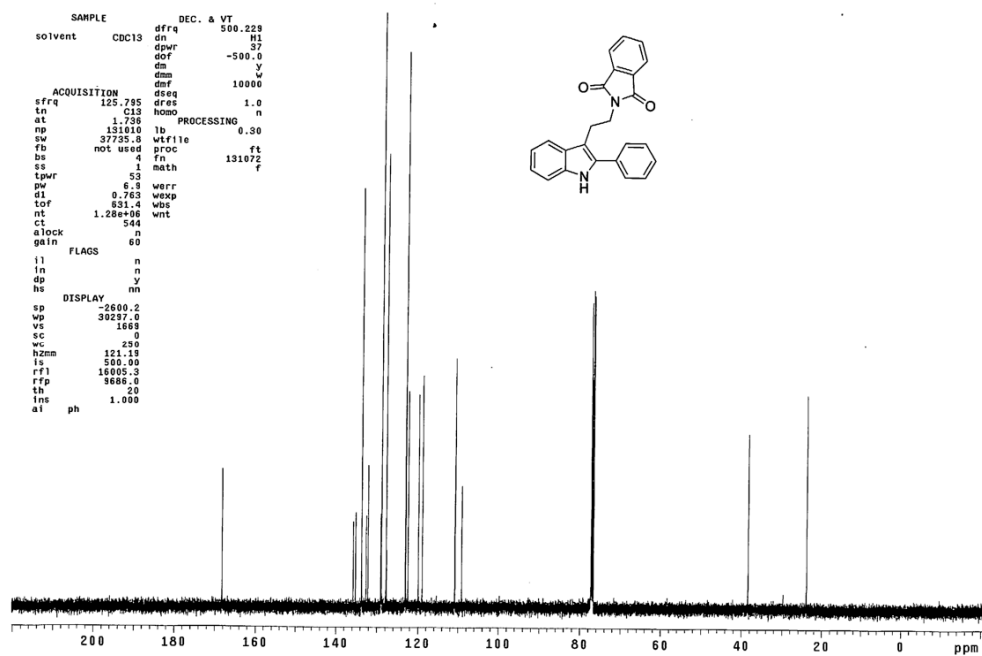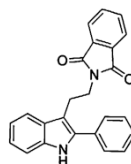

***N,N*-Phthaloyl-2-(4,4,5,5-tetramethyl-1,3,2-dioxaborolan-2-yl)tryptamine (S2):**

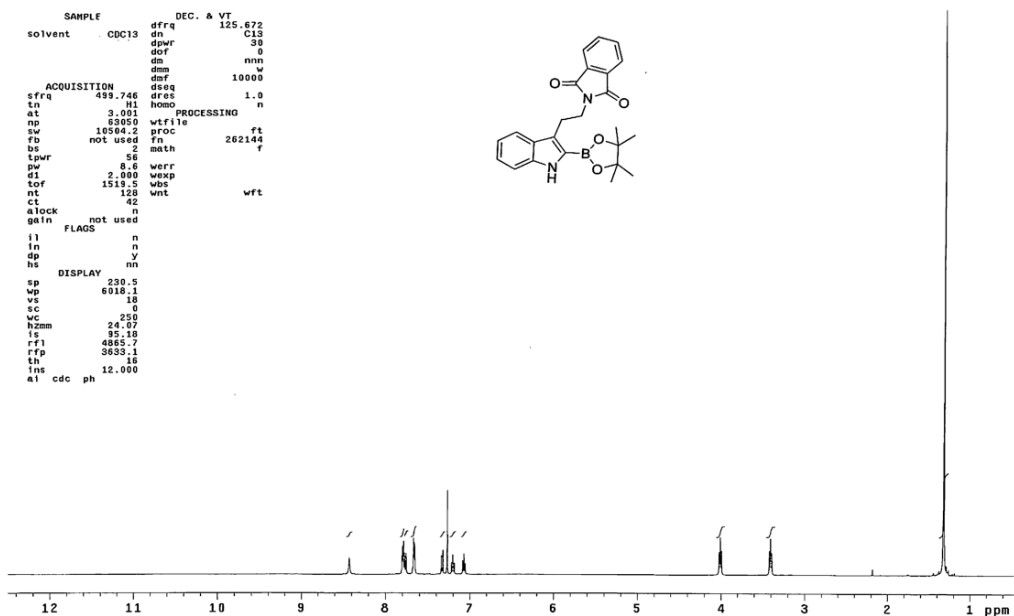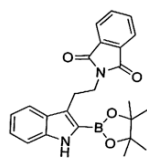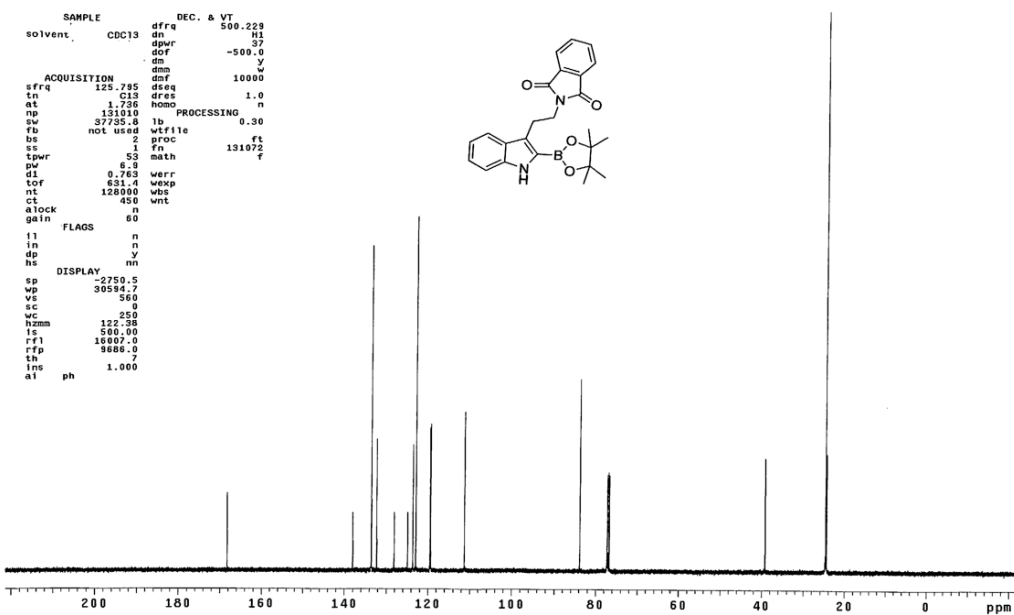

2-(2-(2-(2-(Trifluoromethyl)phenyl)-1H-indol-3-yl)ethyl)isoindoline-1,3-dione (Table 1, Entry 36a):

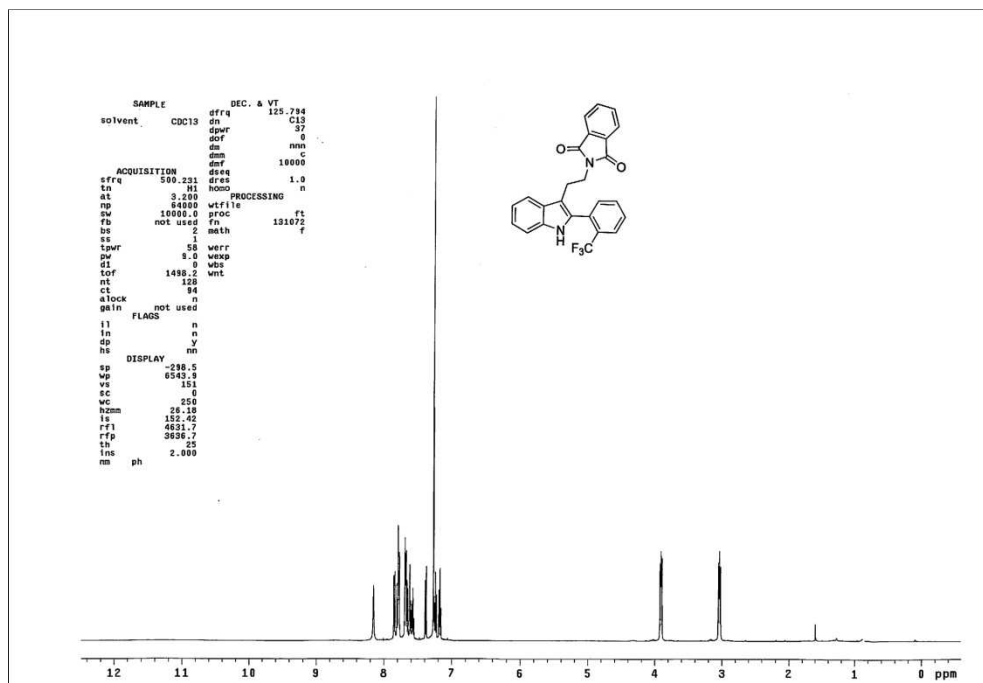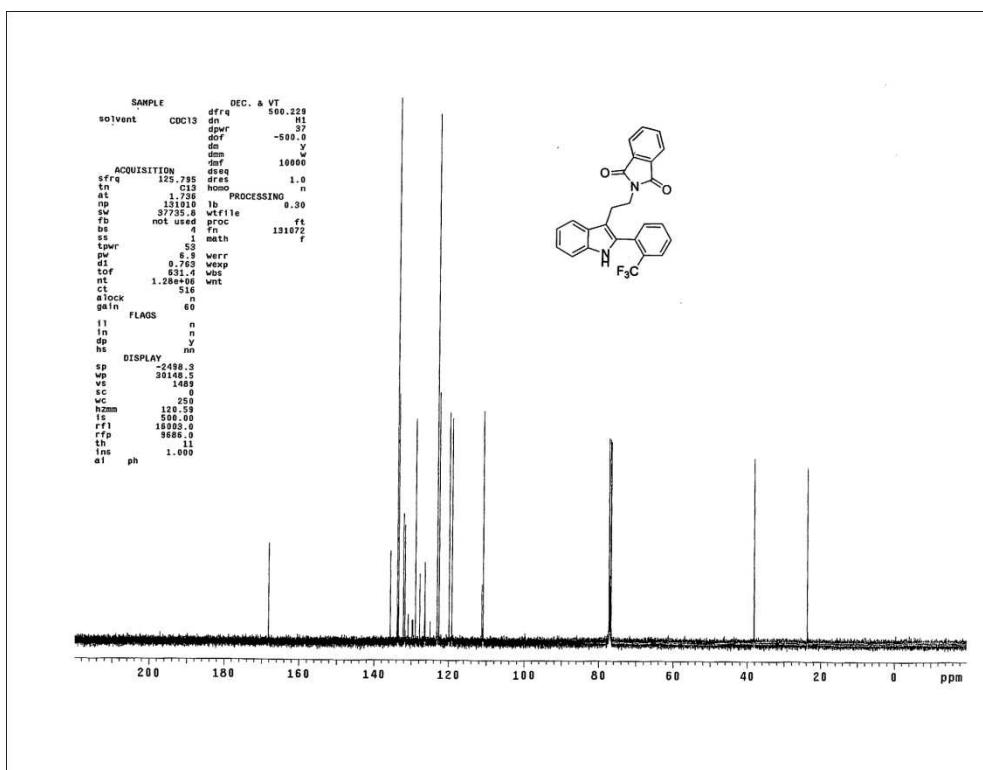

2-(2-(2-(2-Nitrophenyl)-1H-indol-3-yl)ethyl)isoindoline-1,3-dione :(Table 1, Entry 36b):

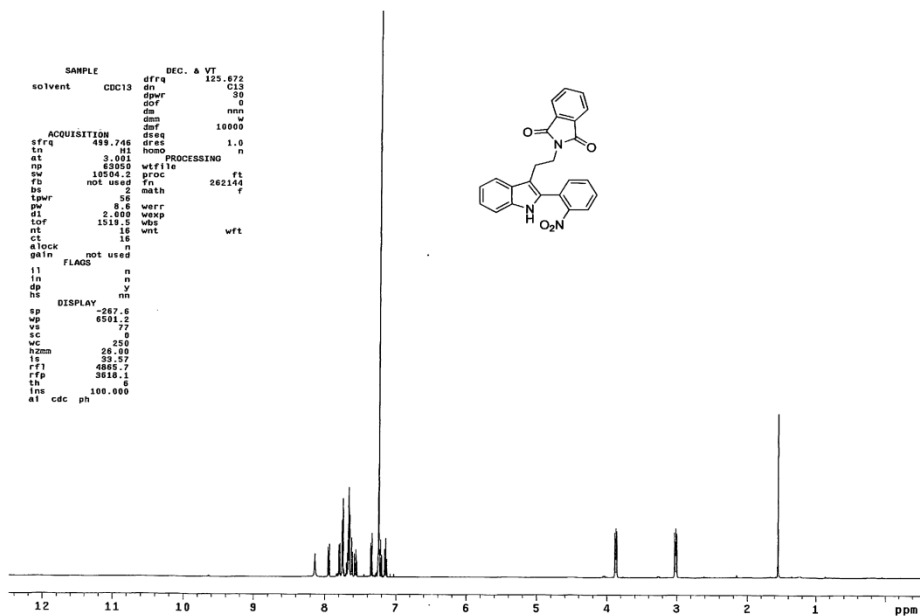

```

SAMPLE          DEC. & VT
solvent         CDC13  dffrq 125.872
                dn      C13   30
                dpwr   0
                ds     nnn
                dsm    w
                dsf    10000
ACQUISITION
sfrq           499.746  dres  1.0
tn             H1
at             3.001   homo
ns             63050
np             10504.2  proc  ft
sv             not used  fn   262144
bs             2       math  f
ss             58
tpwr           8.6    werr
d1             2.000  wexp
tof           1519.5  wbt
nt             16    wnt
ct             16
elock          n
gain           not used
FLAGS
il             n
in             n
dp             y
hs             nn
DISPLAY
sp            -287.6
vp            6501.2
vs             77
sc             0
wc            250
hzmm          26.00
ls            35.27
rf1           4885.7
rfp           2619.1
th            0
ins           100.000
at cdc ph
    
```

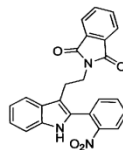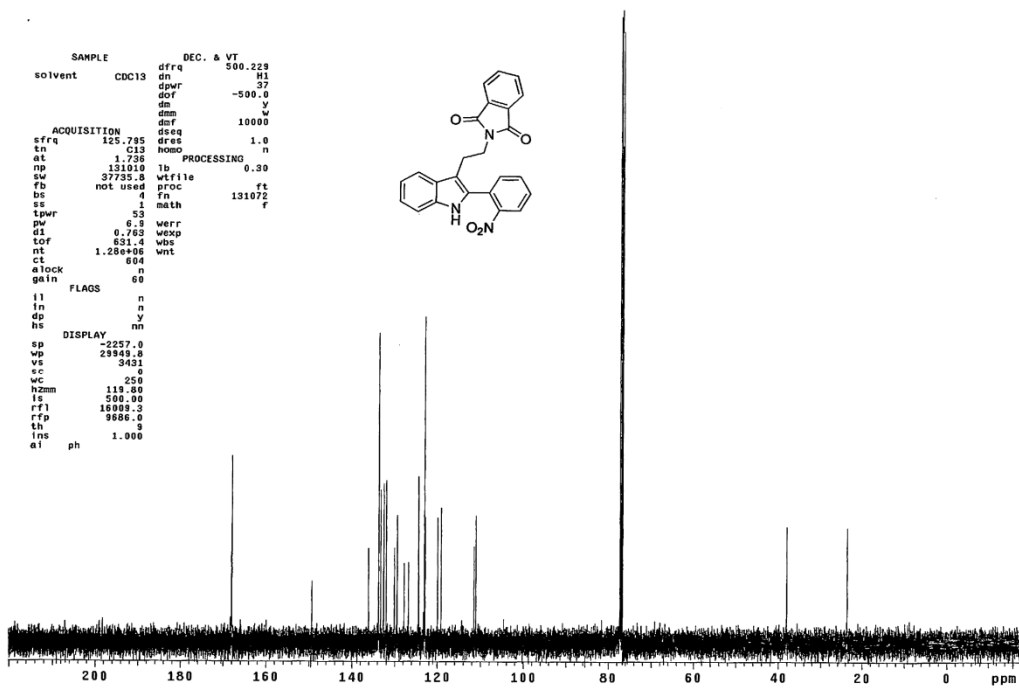

```

SAMPLE          DEC. & VT
solvent         CDC13  dffrq 500.229
                dn      H1
                dpwr   37
                ds     -500.0
                dsm    y
                dsf    10000
ACQUISITION
sfrq           125.795  dres  1.0
tn             C13
at             1.736   homo
ns             131010  lb   0.30
sv             37735.8  wfile
fb             not used  proc  ft
bs             4       fn   131072
ss             1       math  f
tpwr           53
d1             0.8    werr
d2             0.763  wexp
tof           831.4   wbt
nt             1.28e+06 wnt
ct             604
elock          n
gain           60
FLAGS
il             n
in             n
dp             y
hs             nn
DISPLAY
sp            -2257.0
vp            29949.8
vs             3431
sc             0
wc            250
hzmm          119.80
ls            500.00
rf1           16008.3
rfp           9886.0
th            0
ins           1.000
at ph
    
```

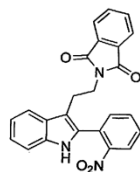



2-(2-(2-(*o*-Tolyl)-1*H*-indol-3-yl)ethyl)isoindoline-1,3-dione: (Table 1, Entry 36c):

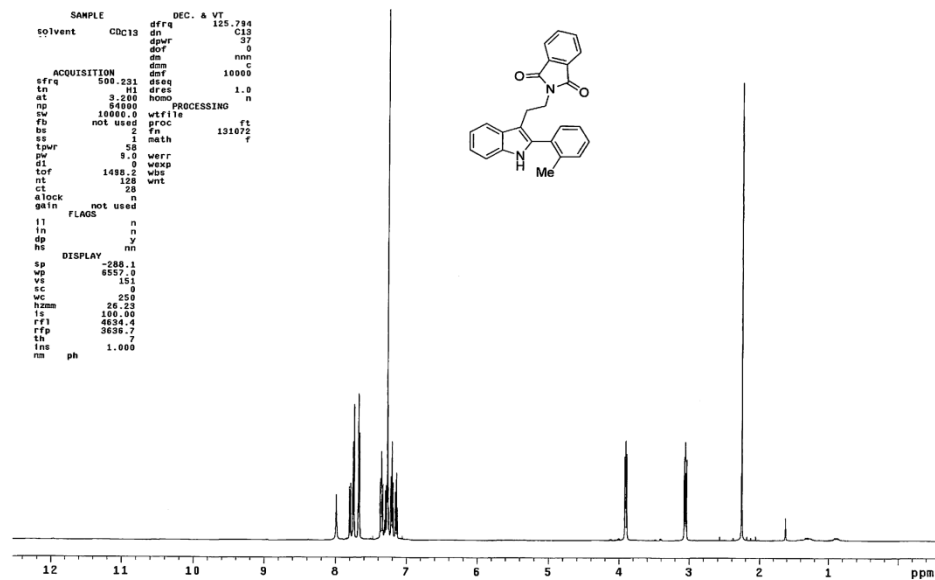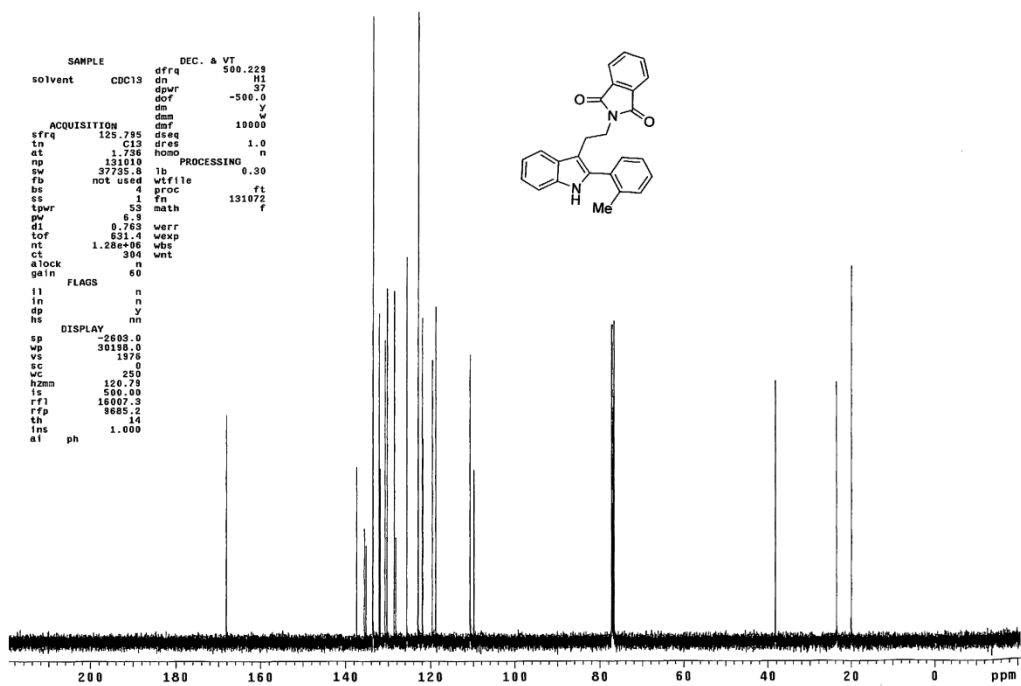

**2-(2-(2-(2-Methoxyphenyl)-1H-indol-3-yl)ethyl)isoindoline-1,3-dione : (Table 1, Entry 36d):**

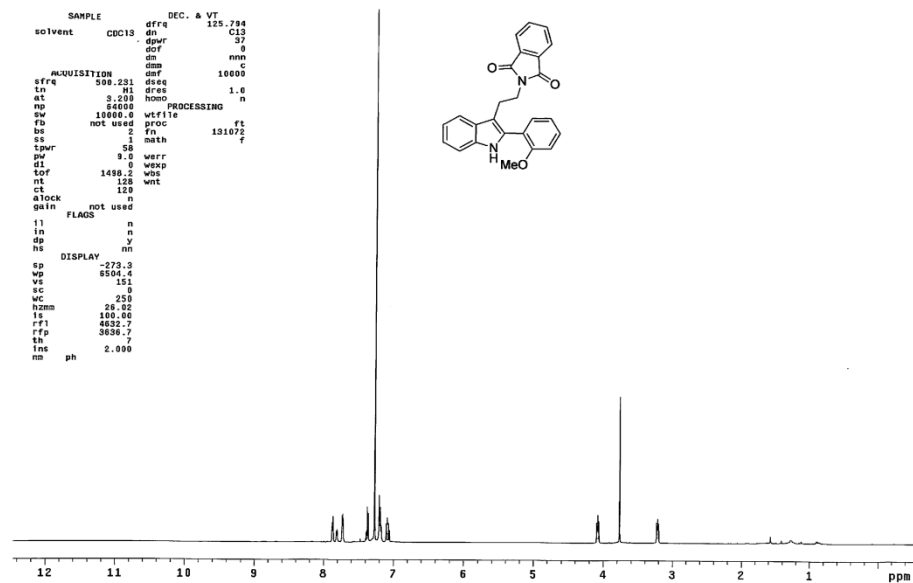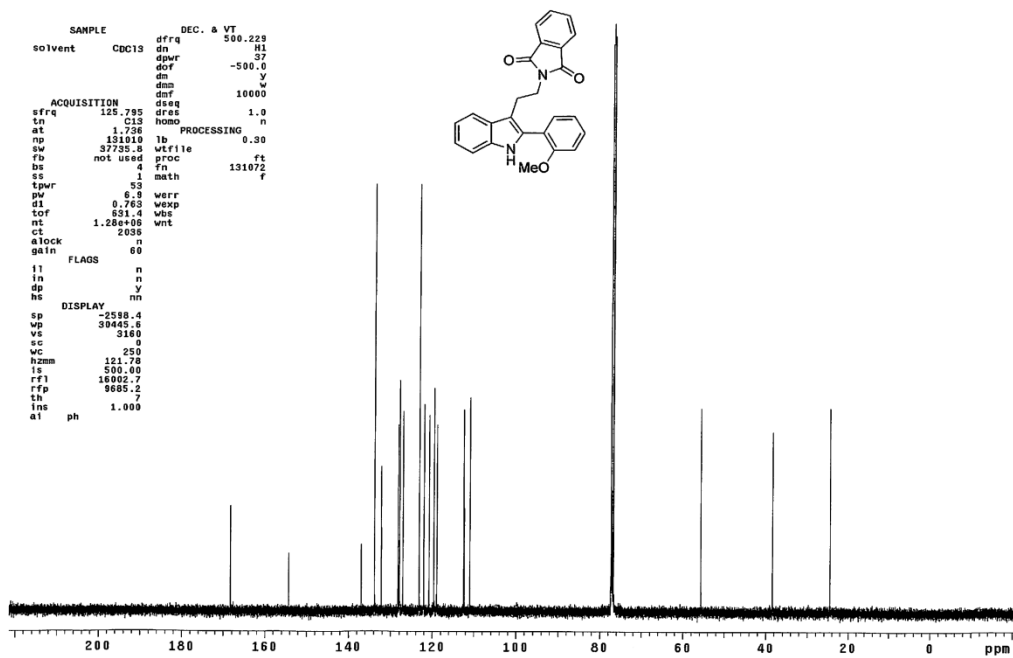

2-(2-(2-(4-Methoxyphenyl)-1H-indol-3-yl)ethyl)isoindoline-1,3-dione: (Table 1, Entry 36e):

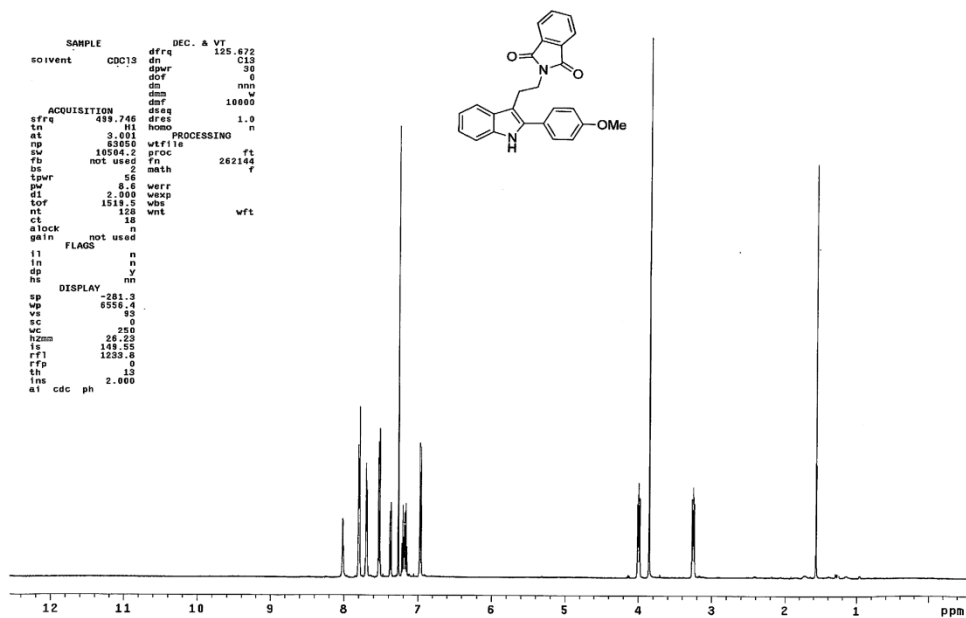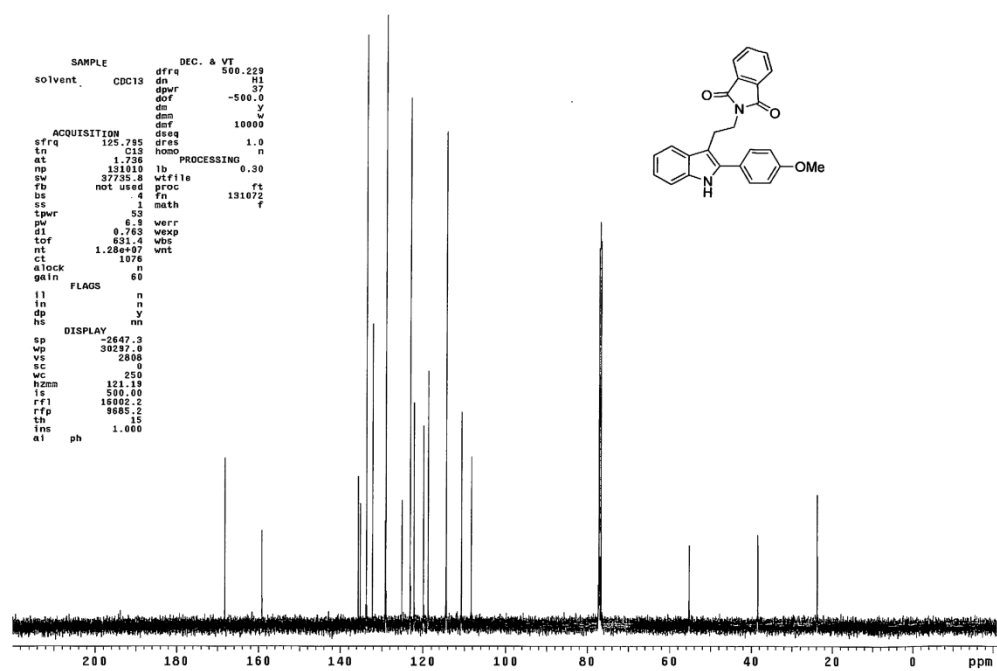

**2-(2-(2-(4-(Trifluoromethyl)phenyl)-1H-indol-3-yl)ethyl)isoindoline-1,3-dione:**  
**(Table 1, Entry 36f):**

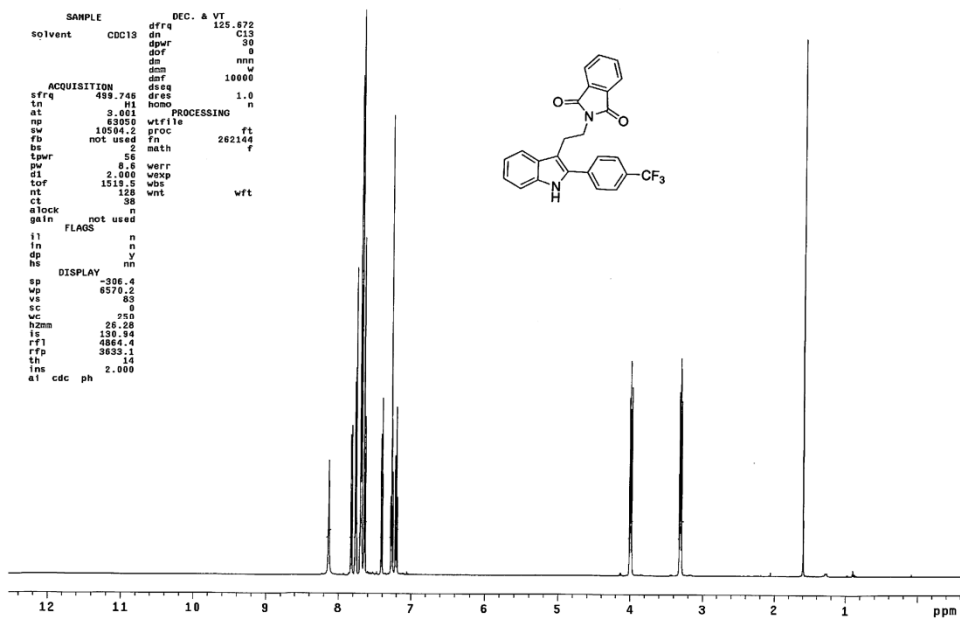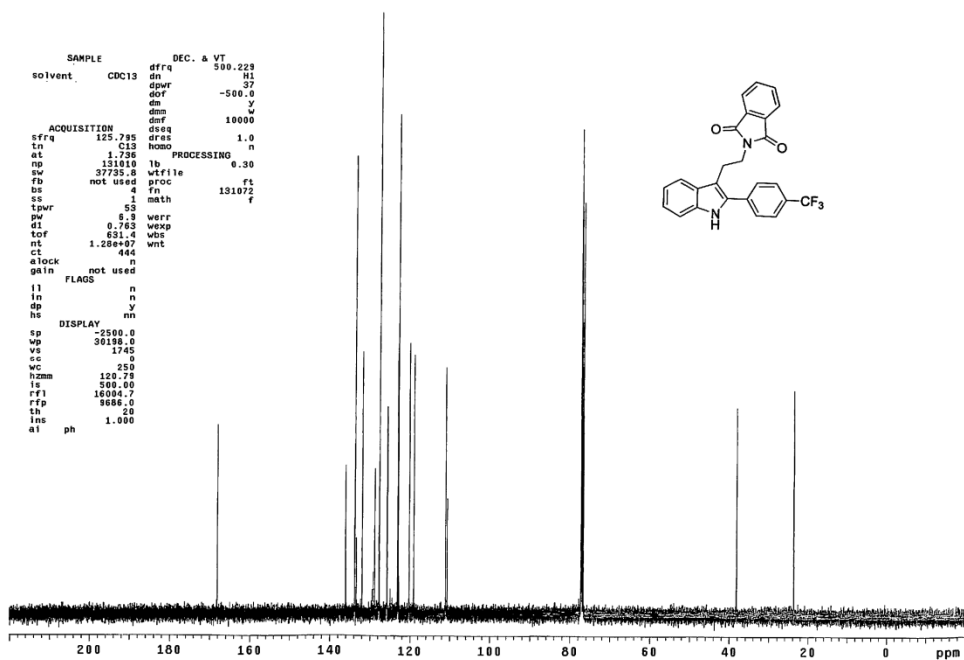

2-(2-(2-(Anthracen-1-yl)-1H-indol-3-yl)ethyl)isoindoline-1,3-dione: (Table 2, Entry 38a):

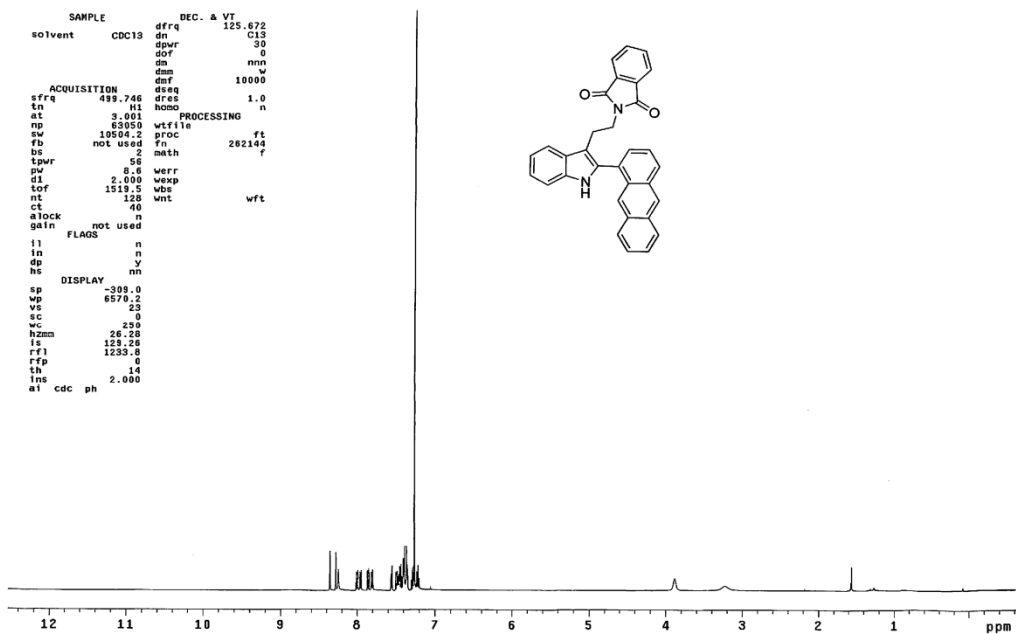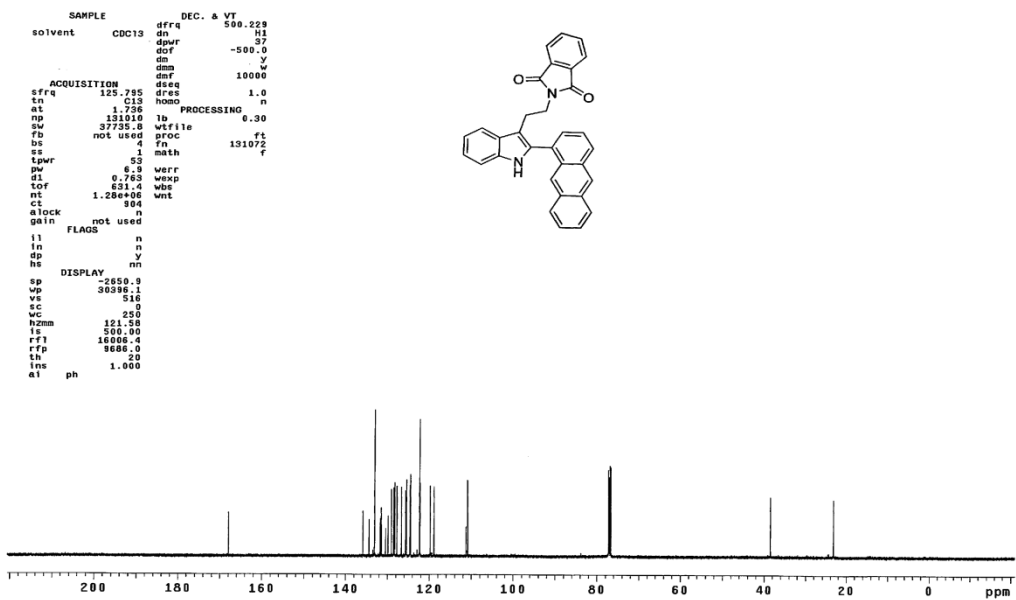

2-(2-(2-(Anthracen-9-yl)-1H-indol-3-yl)ethyl)isoindoline-1,3-dione: (Table 2, Entry 38b):

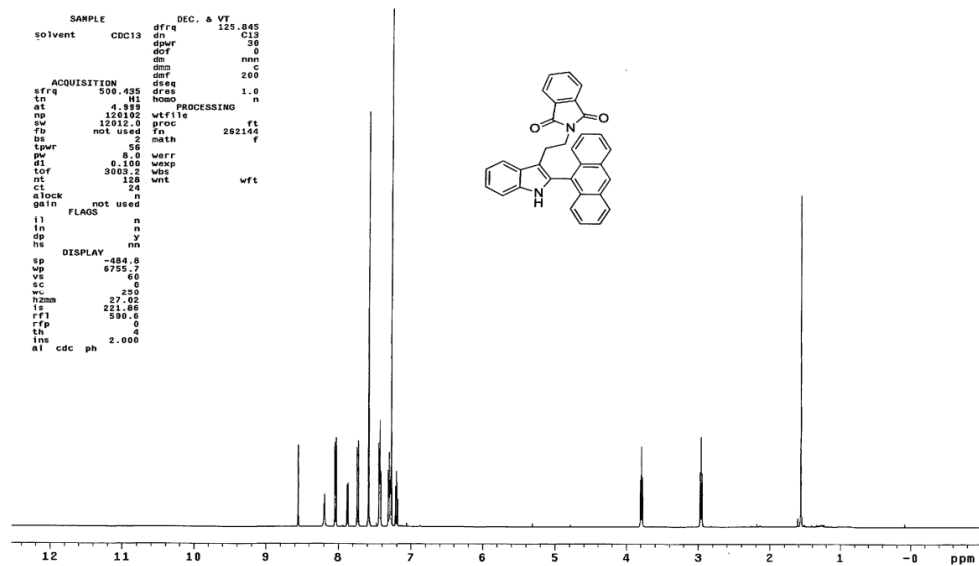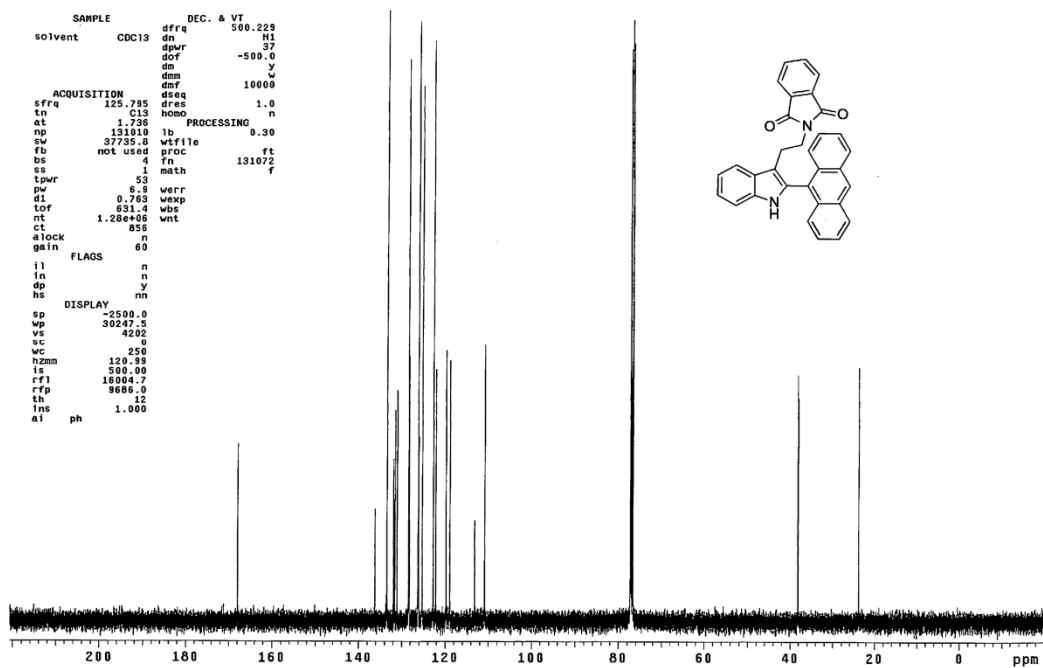

2-(2-(2-(Naphthalen-2-yl)-1H-indol-3-yl)ethyl)isoindoline-1,3-dione: (Table 2, Entry 38c):

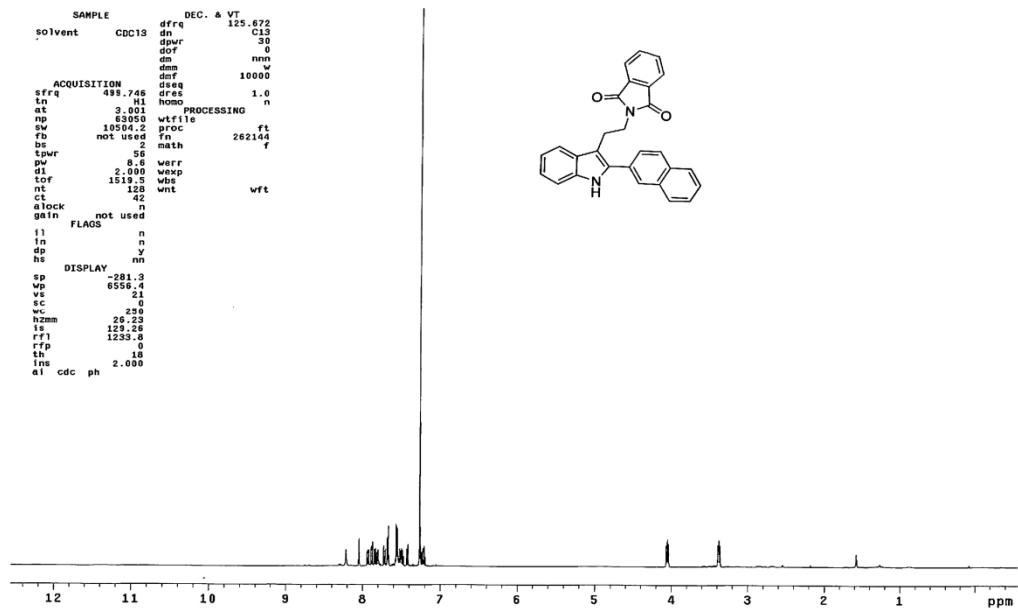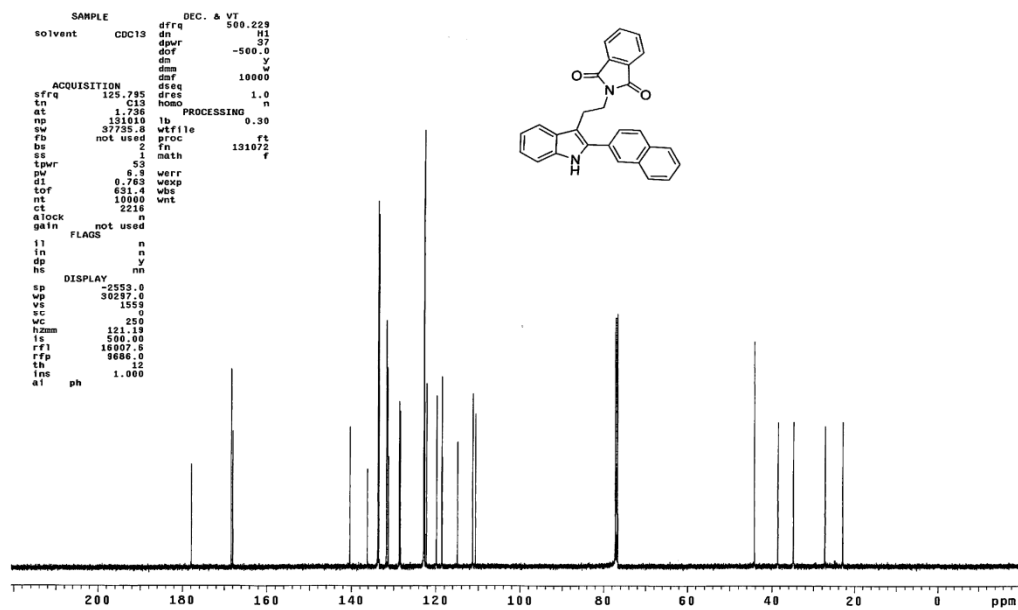

2-(2-(1'-((2-(Trimethylsilyl)ethyl)sulfonyl)-1*H*,1'*H*-[2,7'-bisindol]-3-yl)ethyl)isoindoline-1,3-dione: (Table 3, Entry 42):

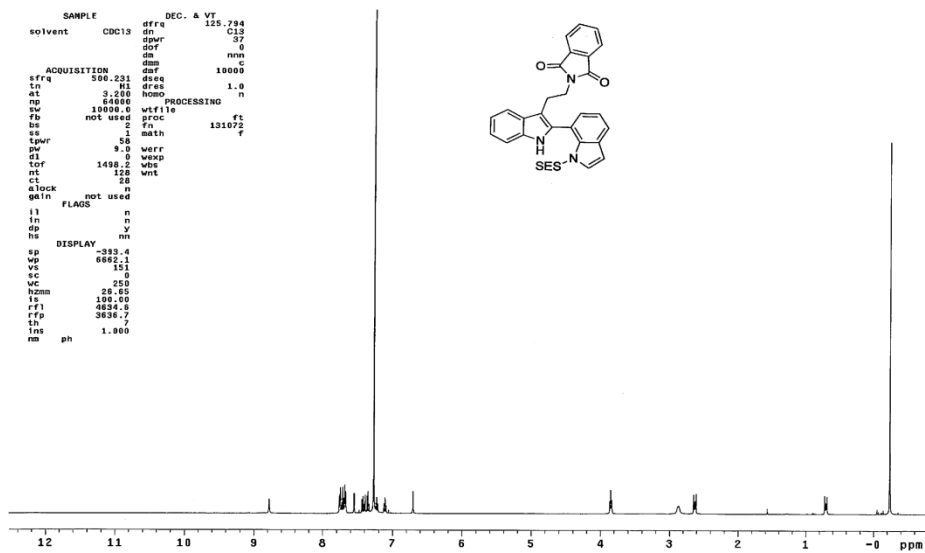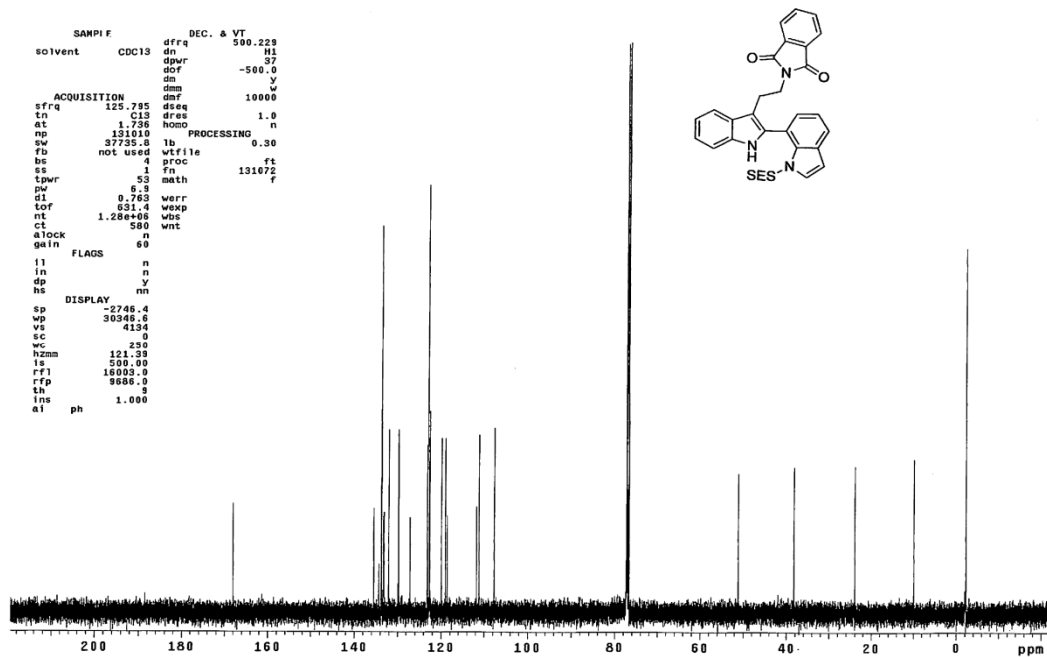



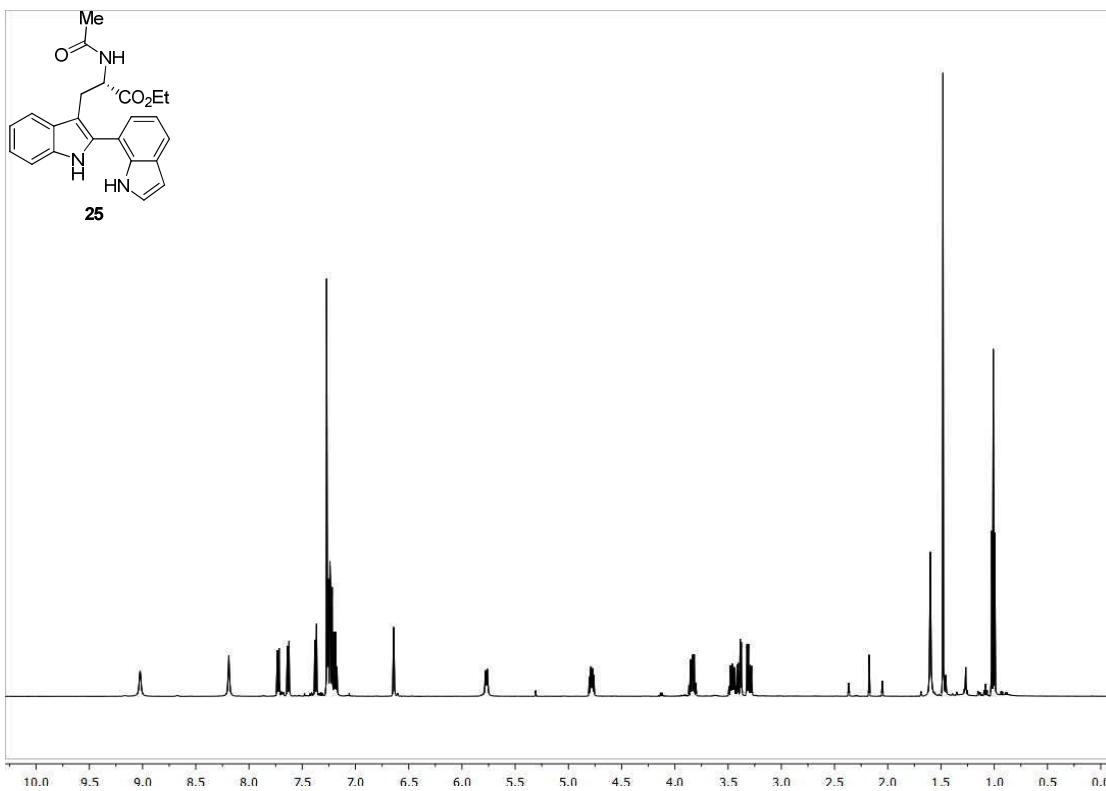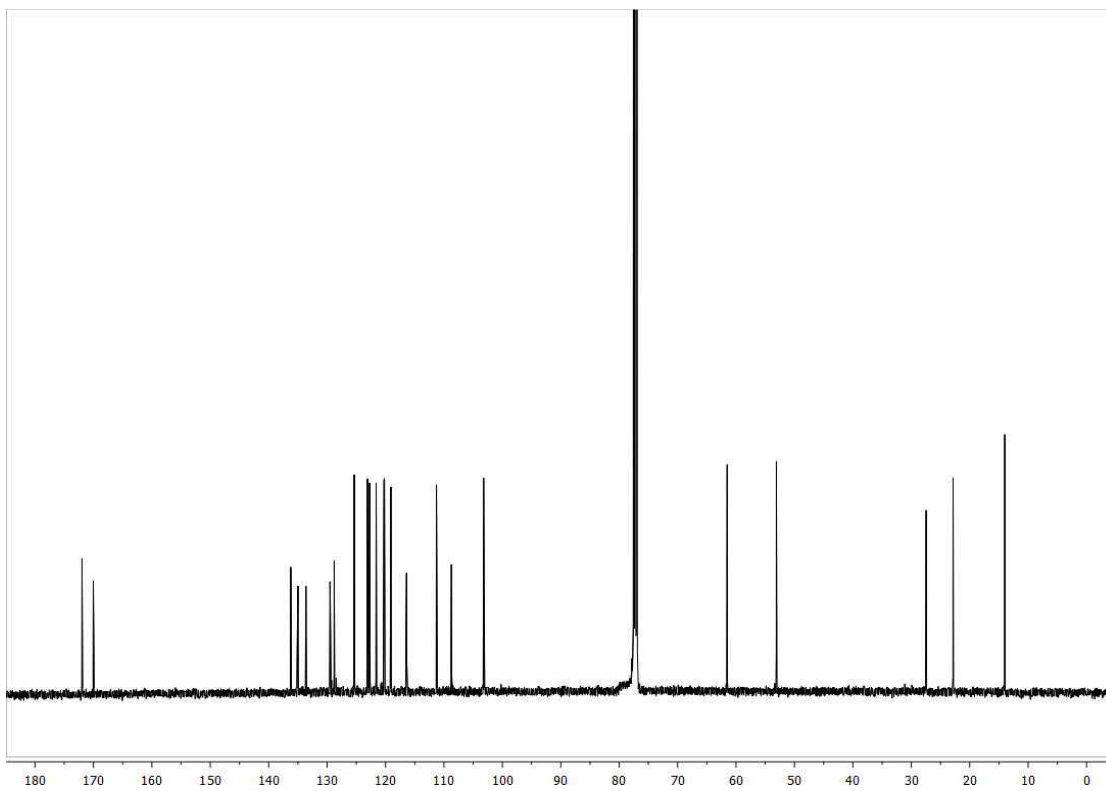

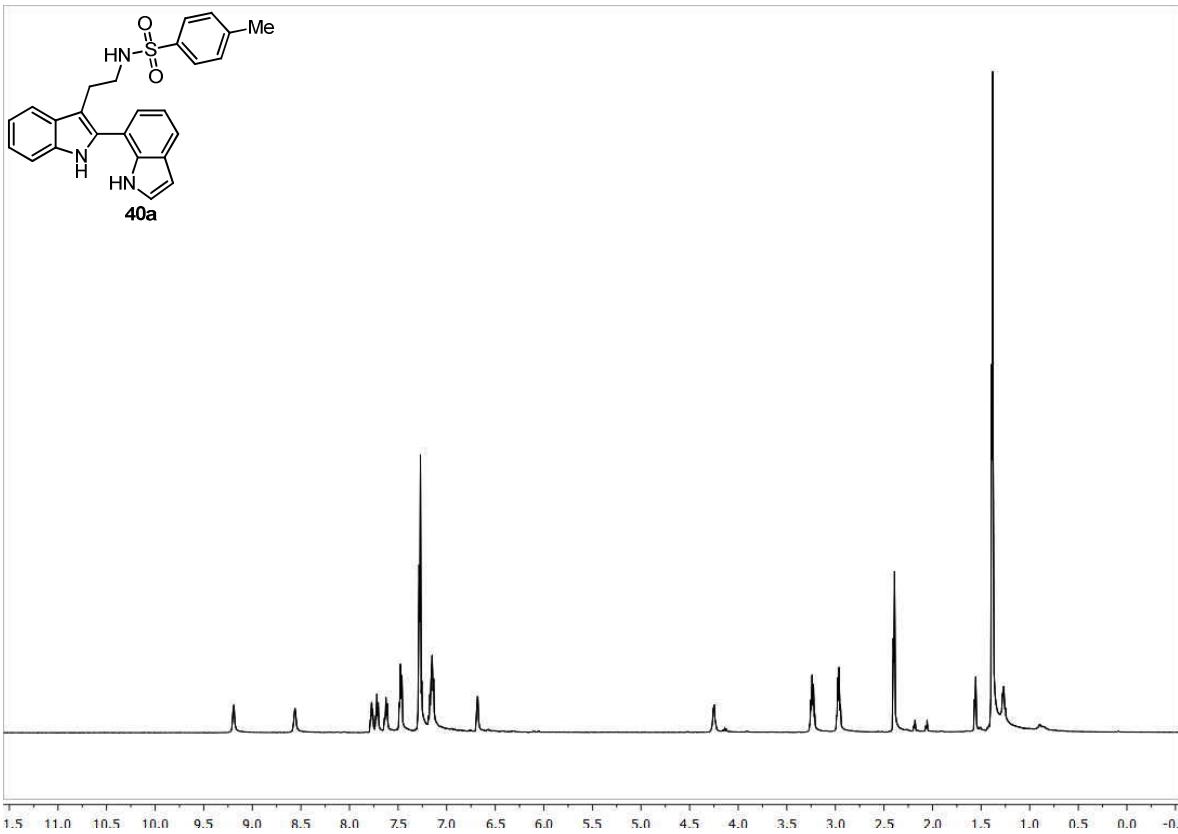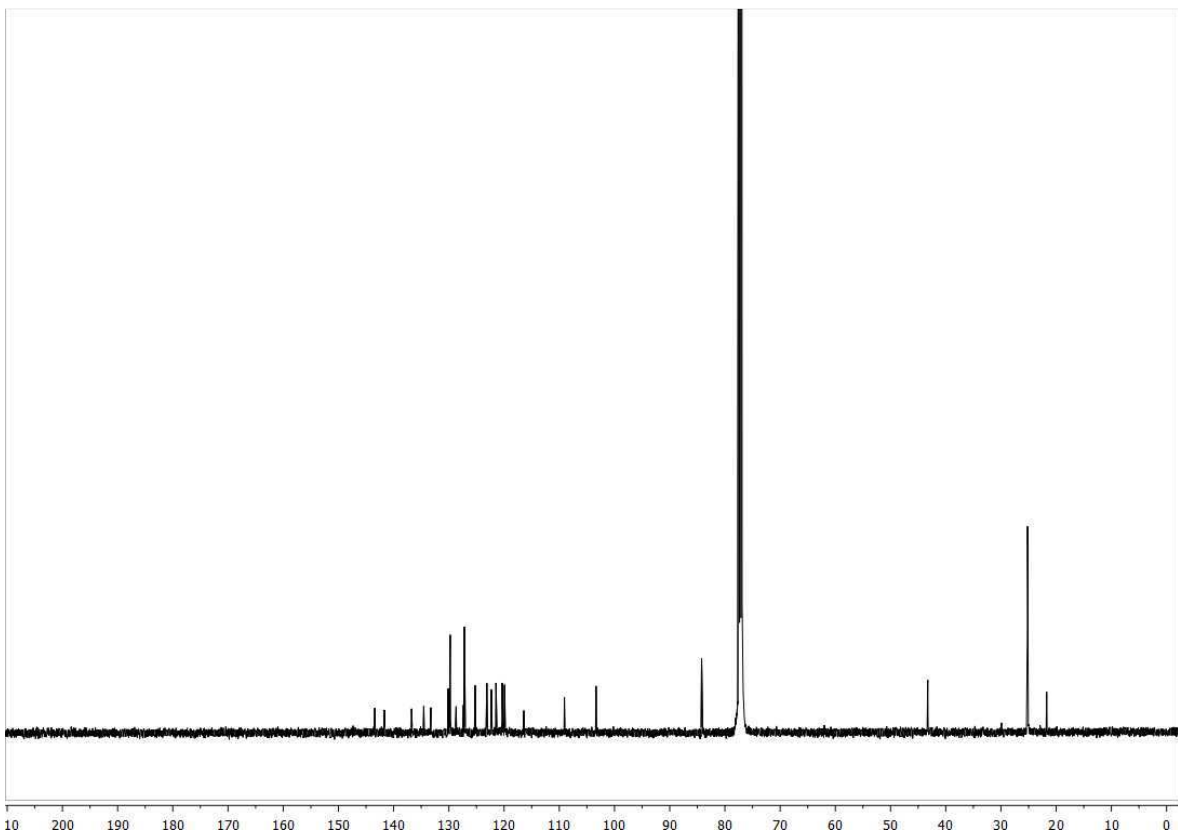

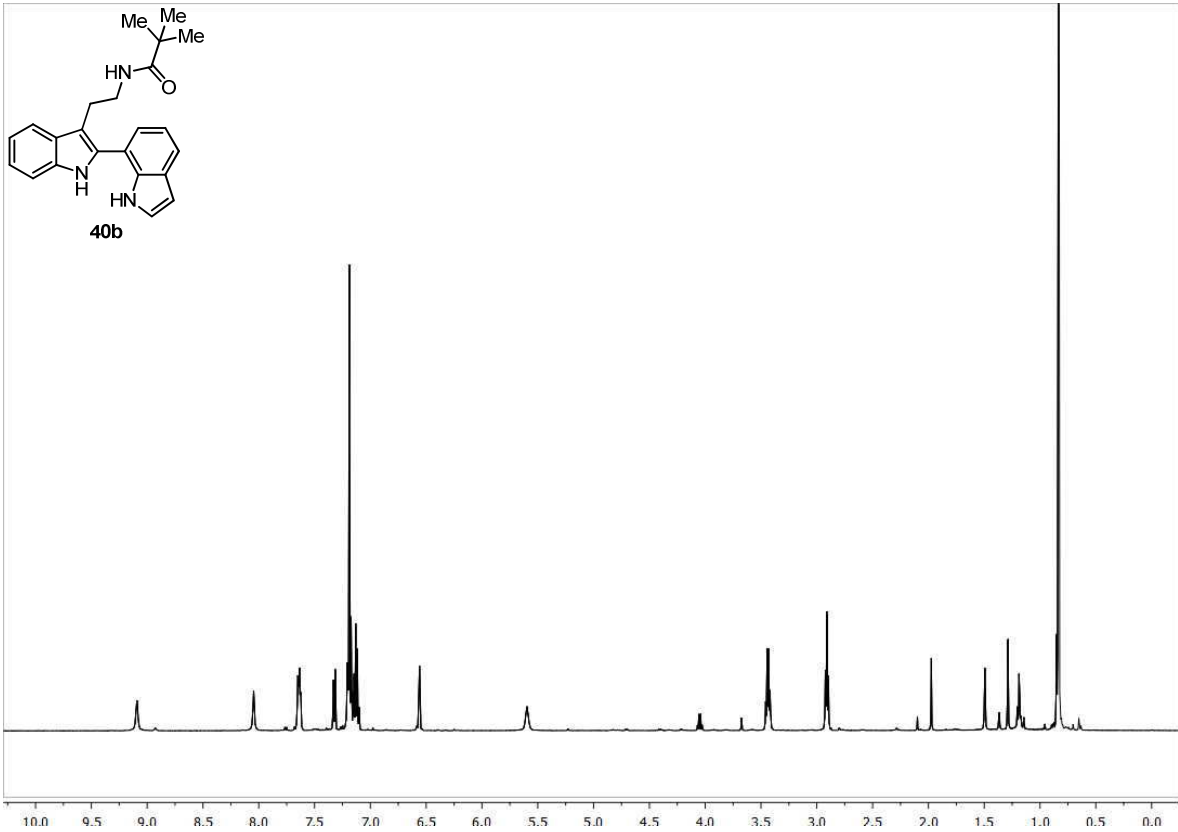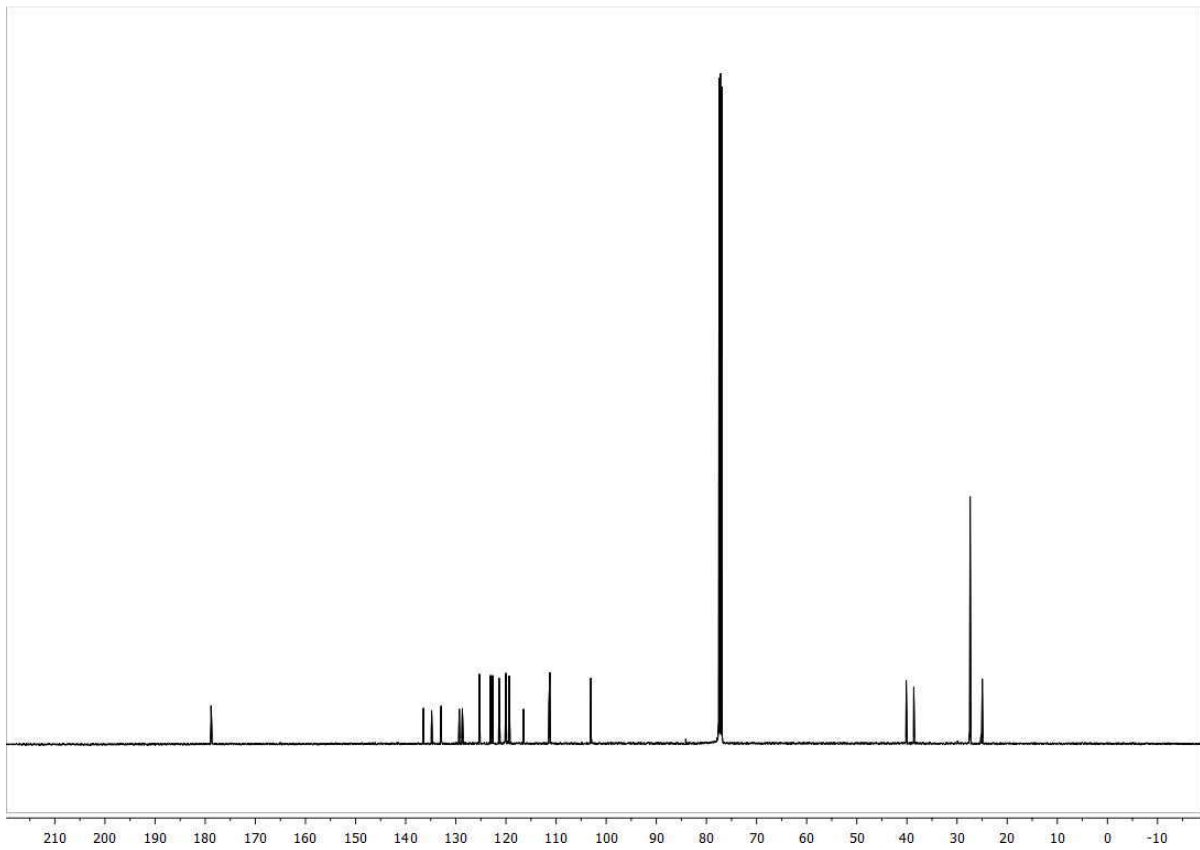

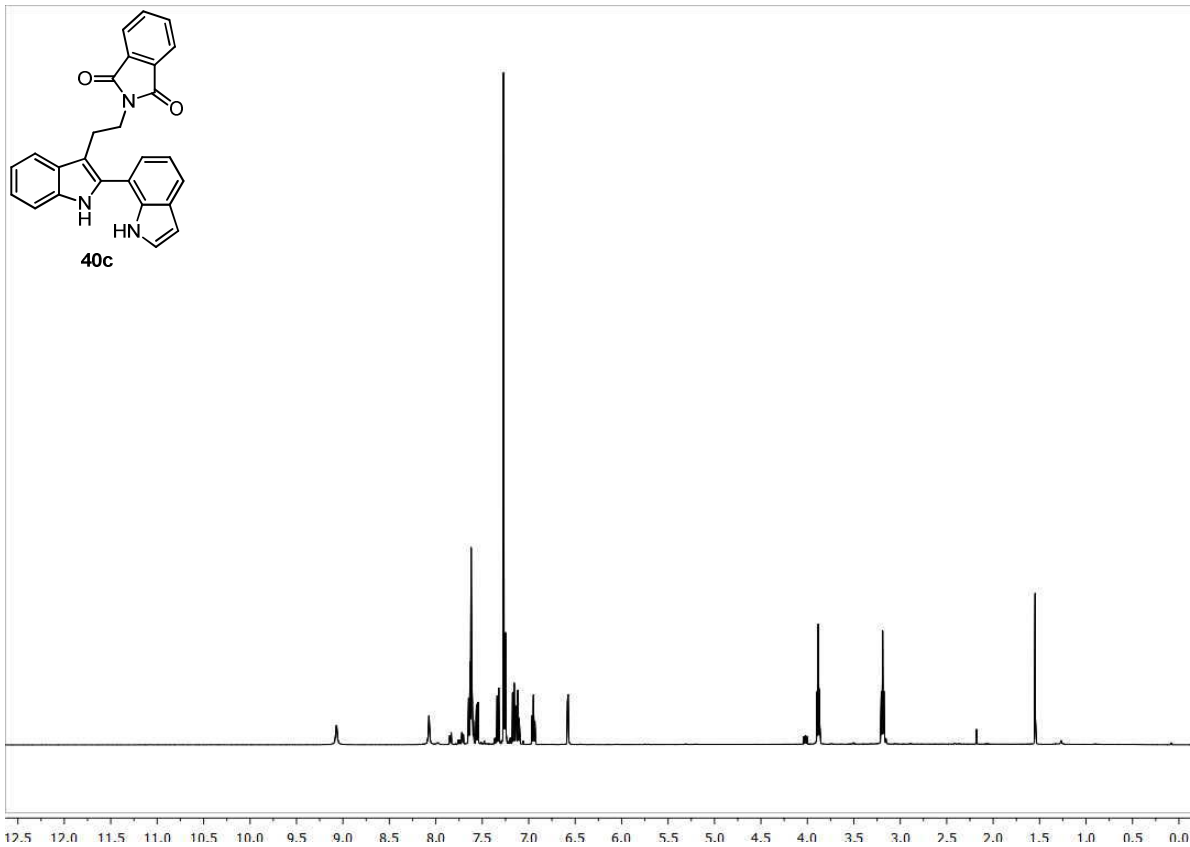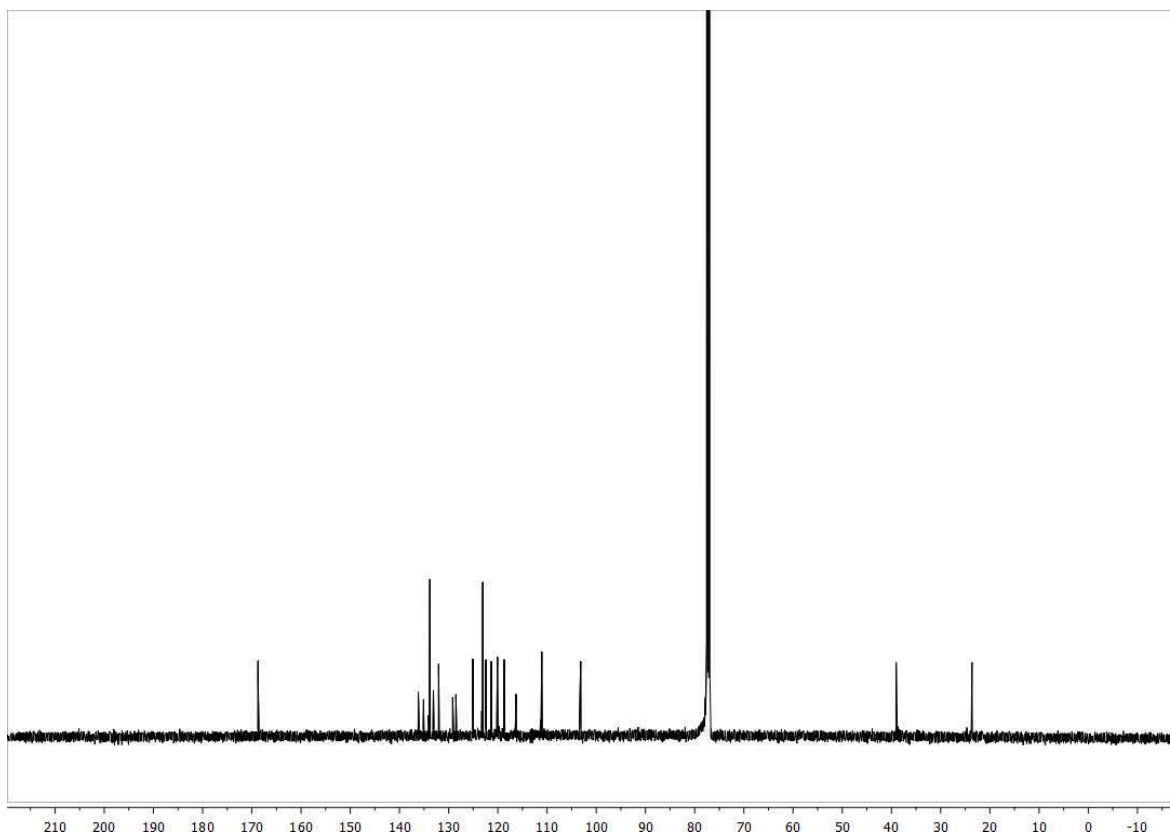

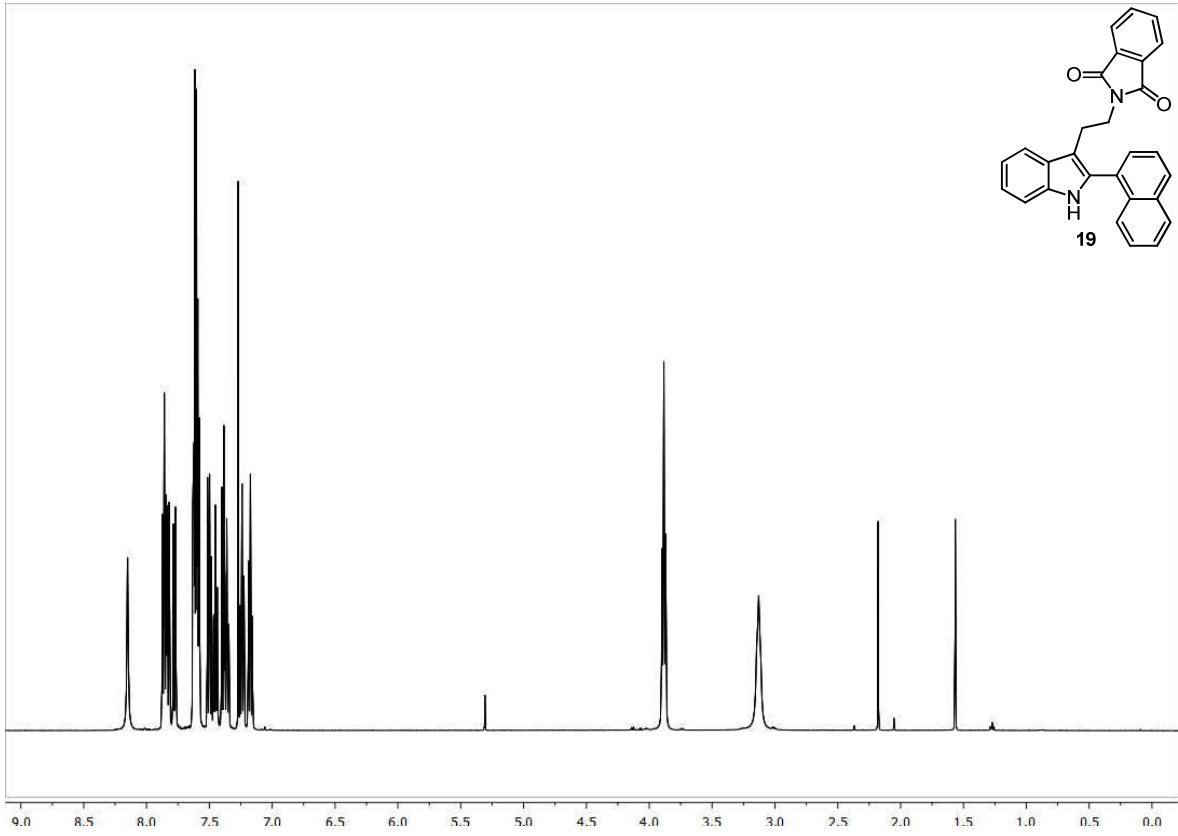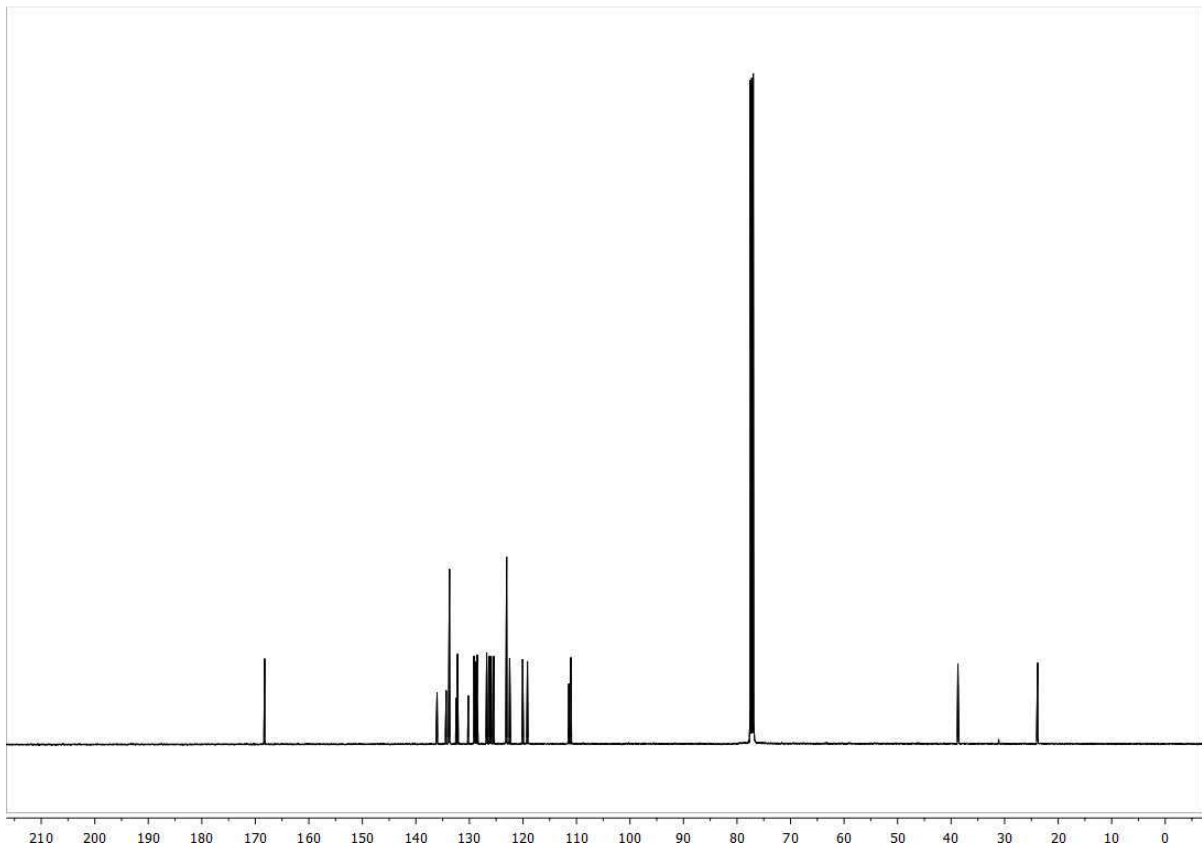

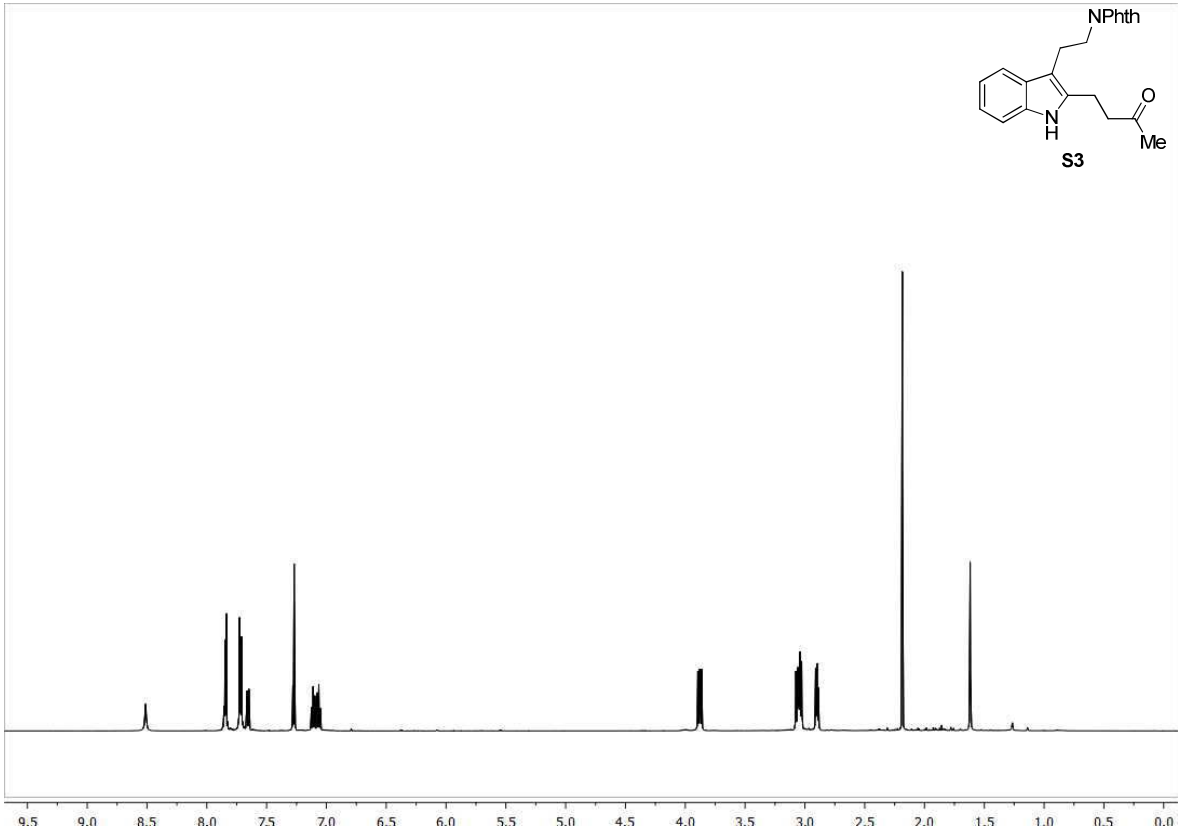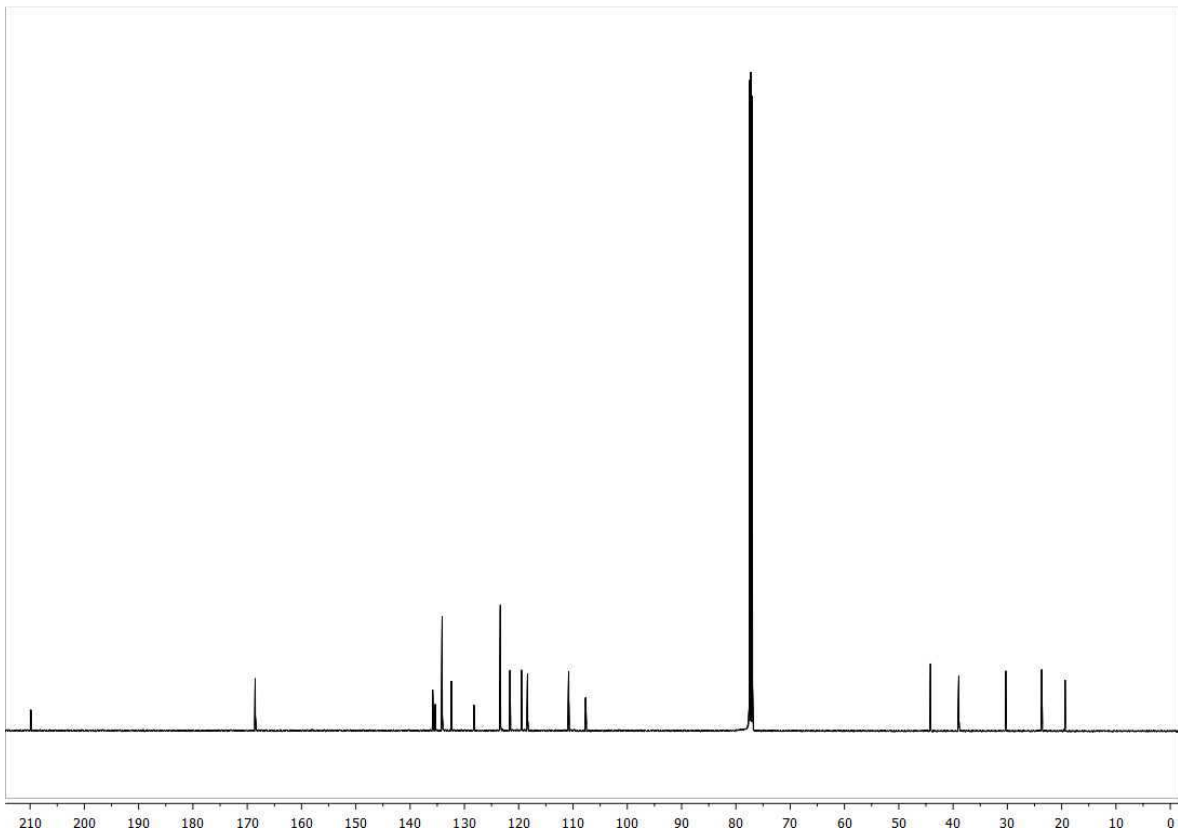

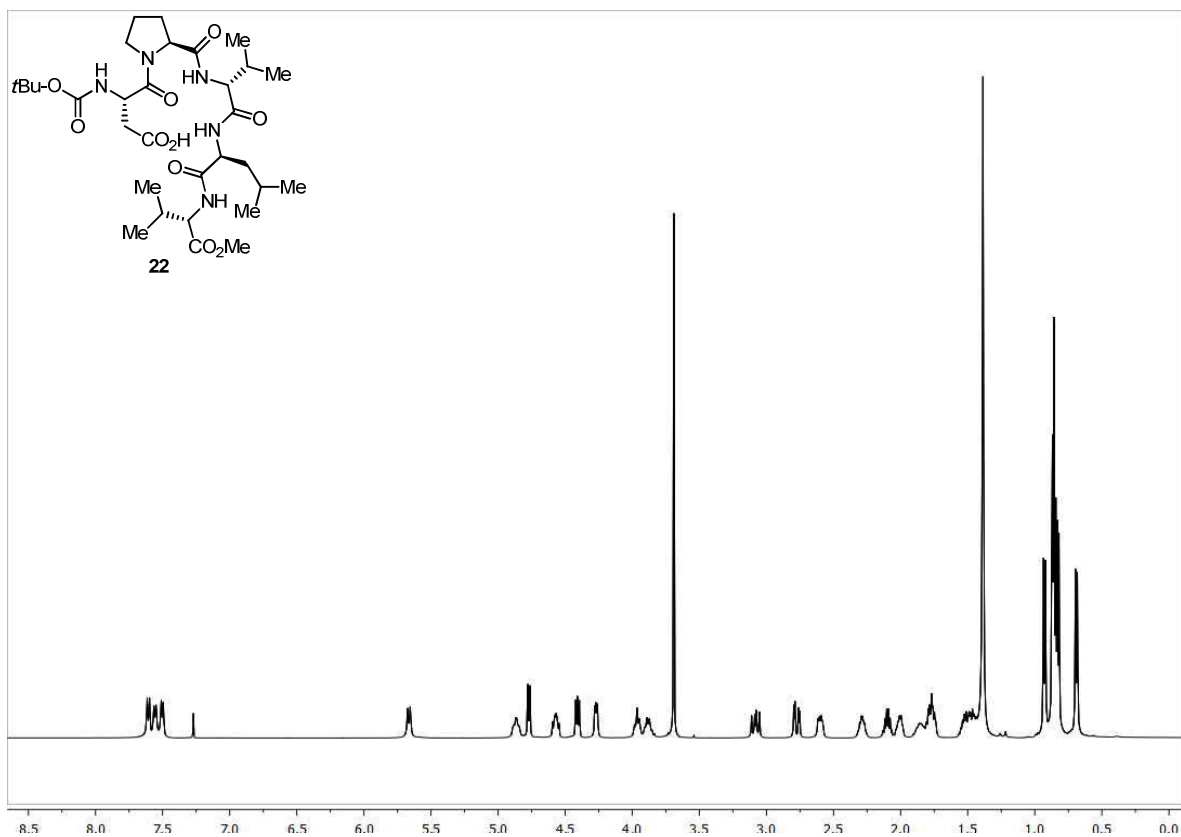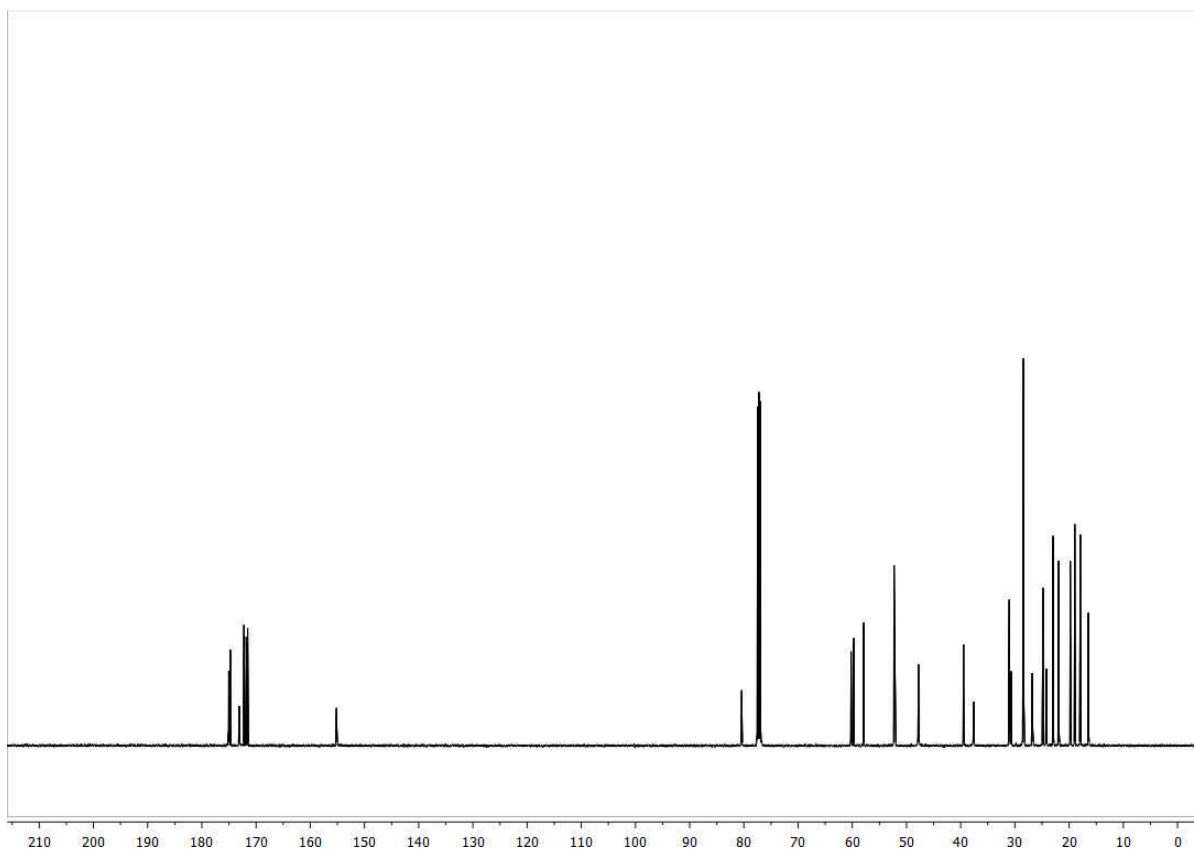

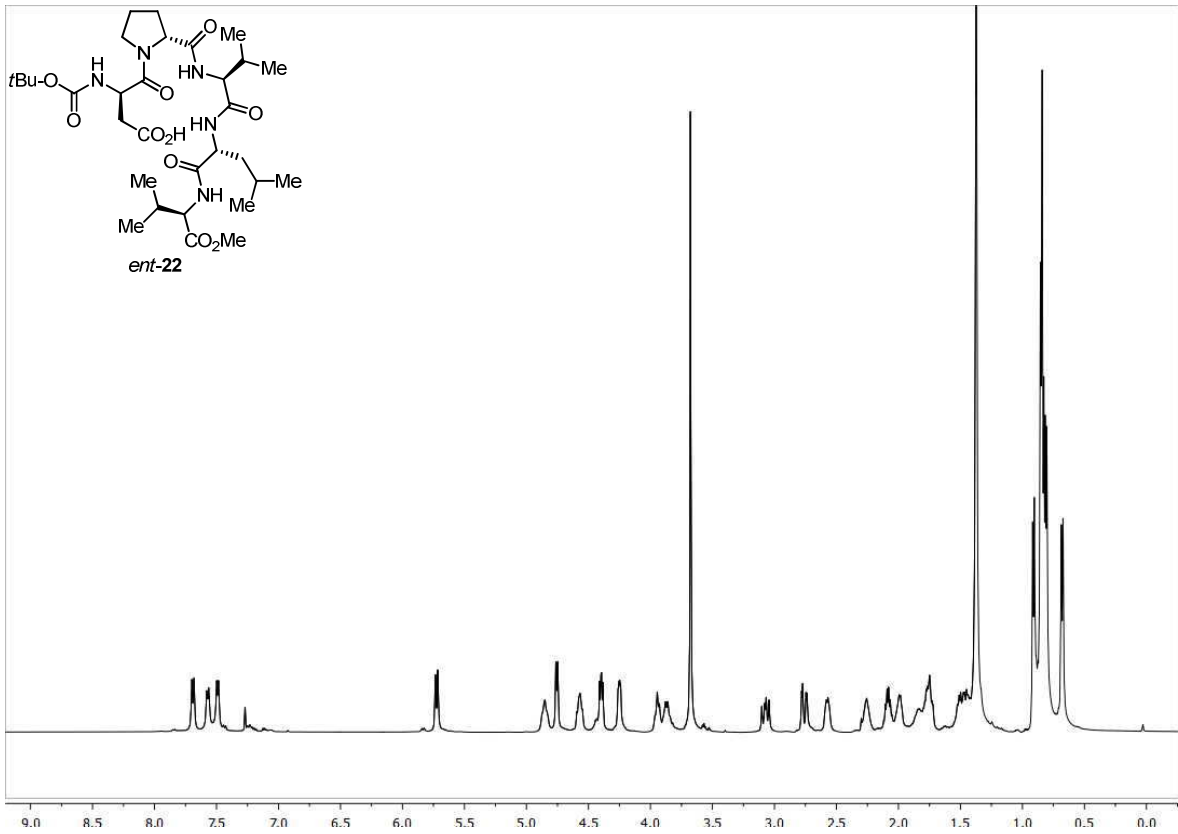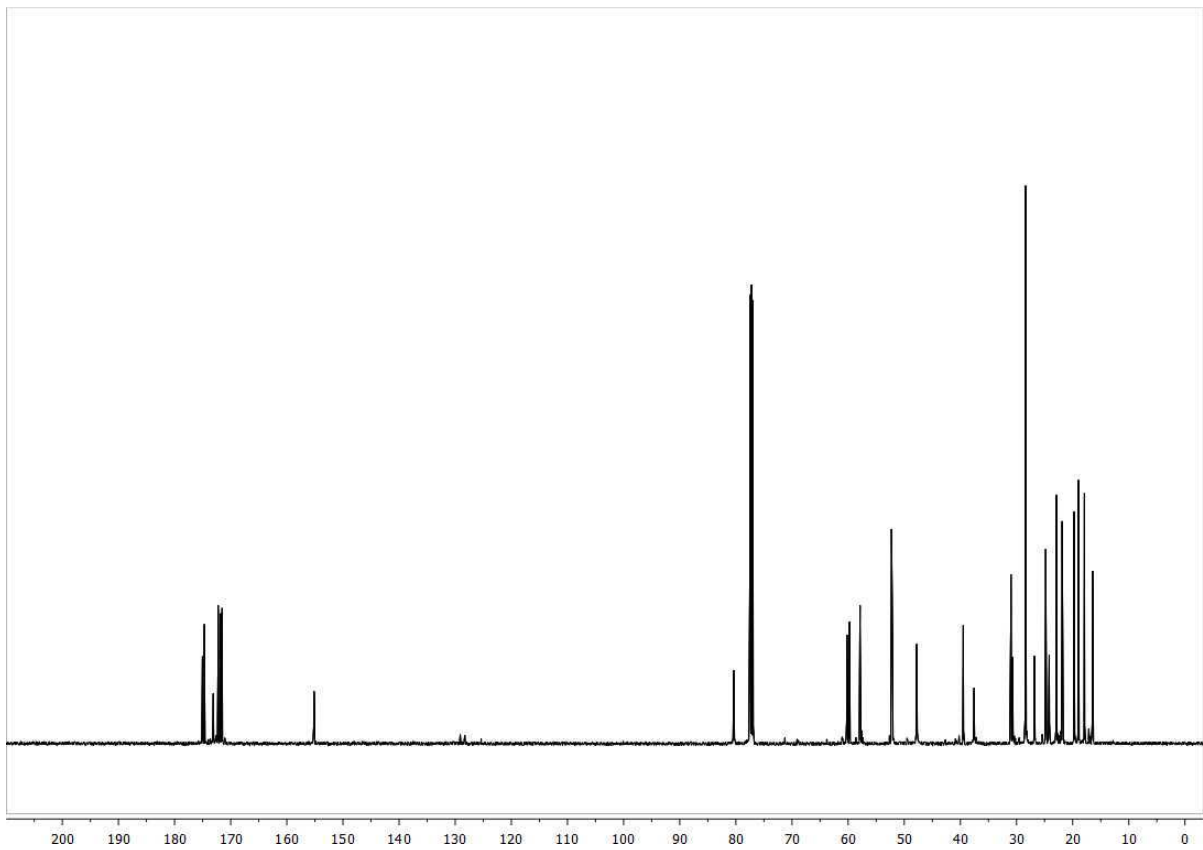



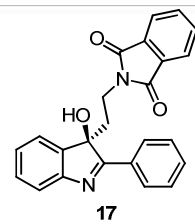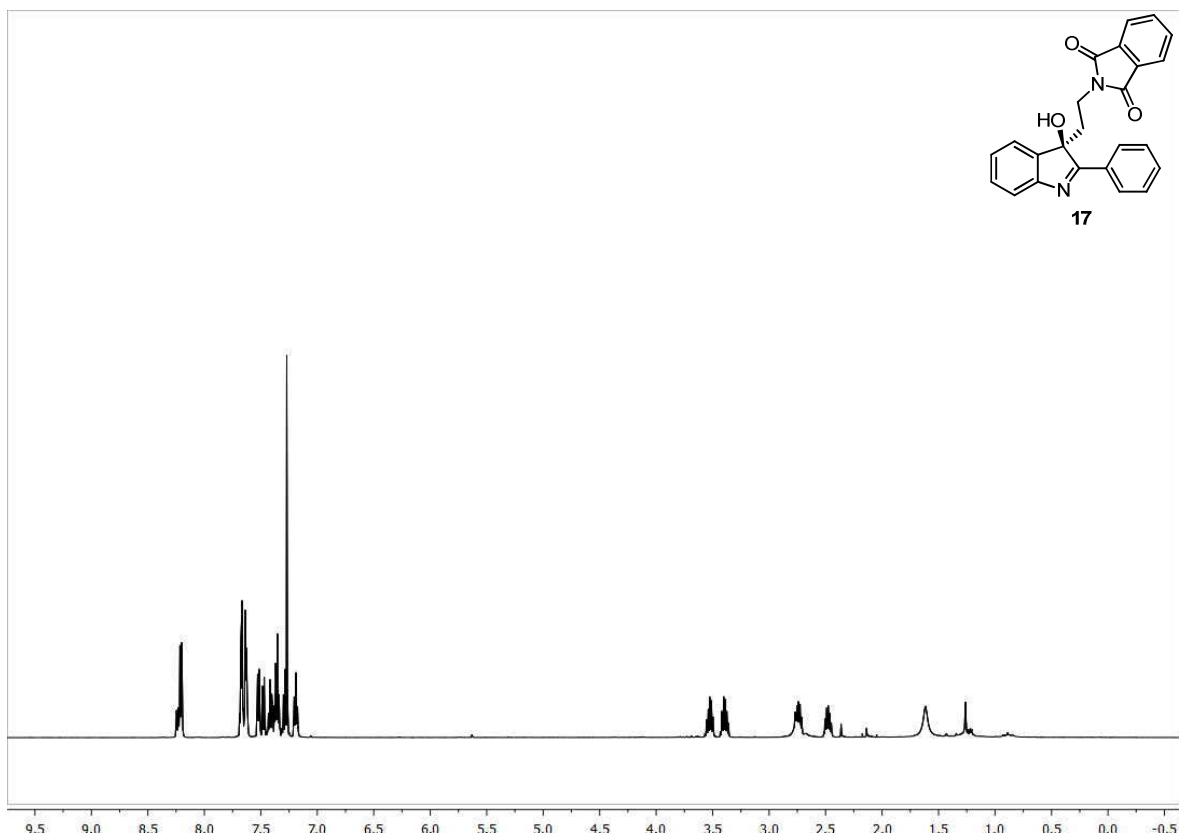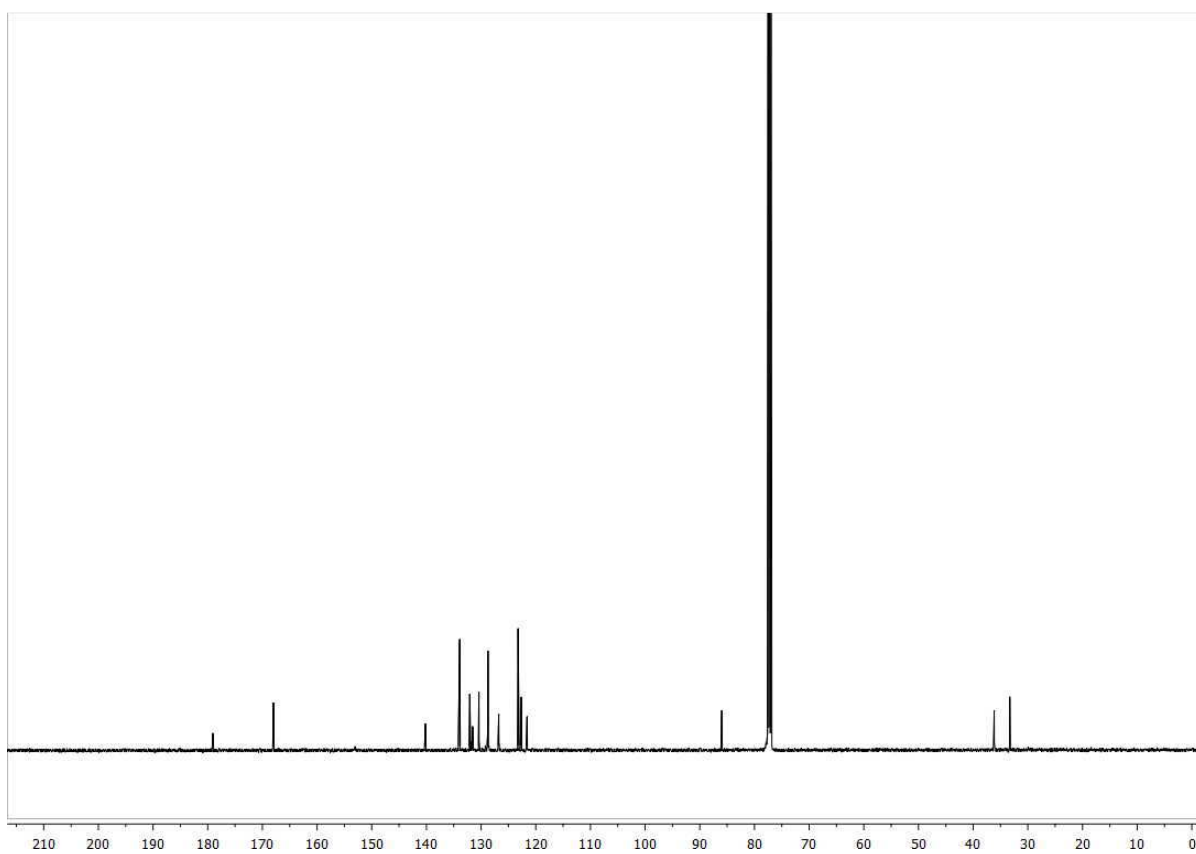

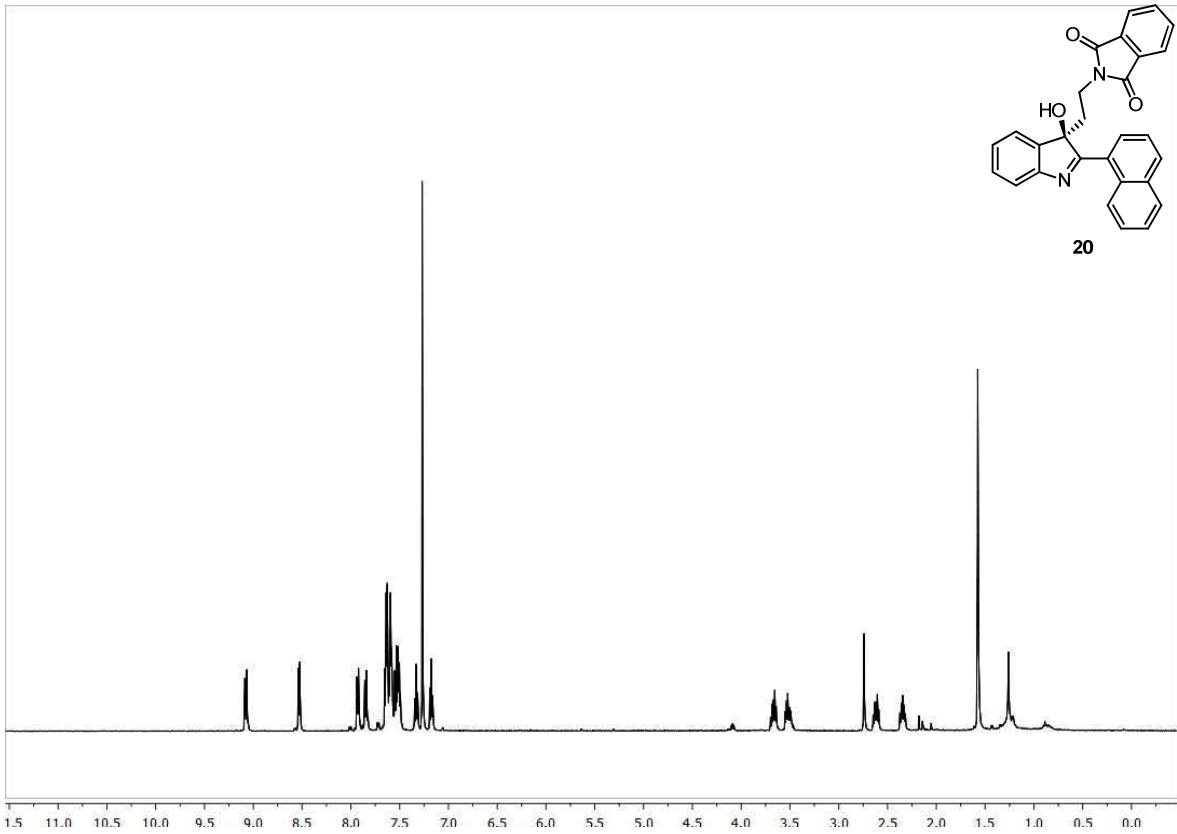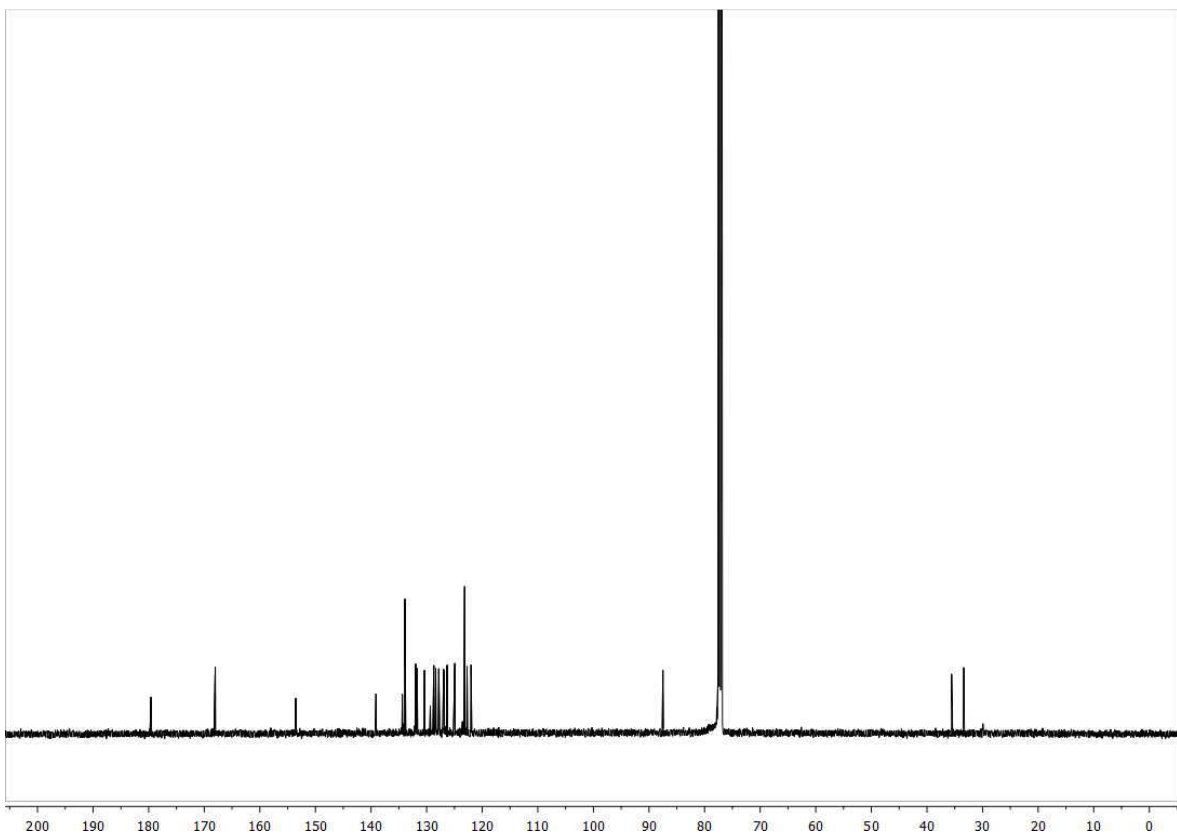

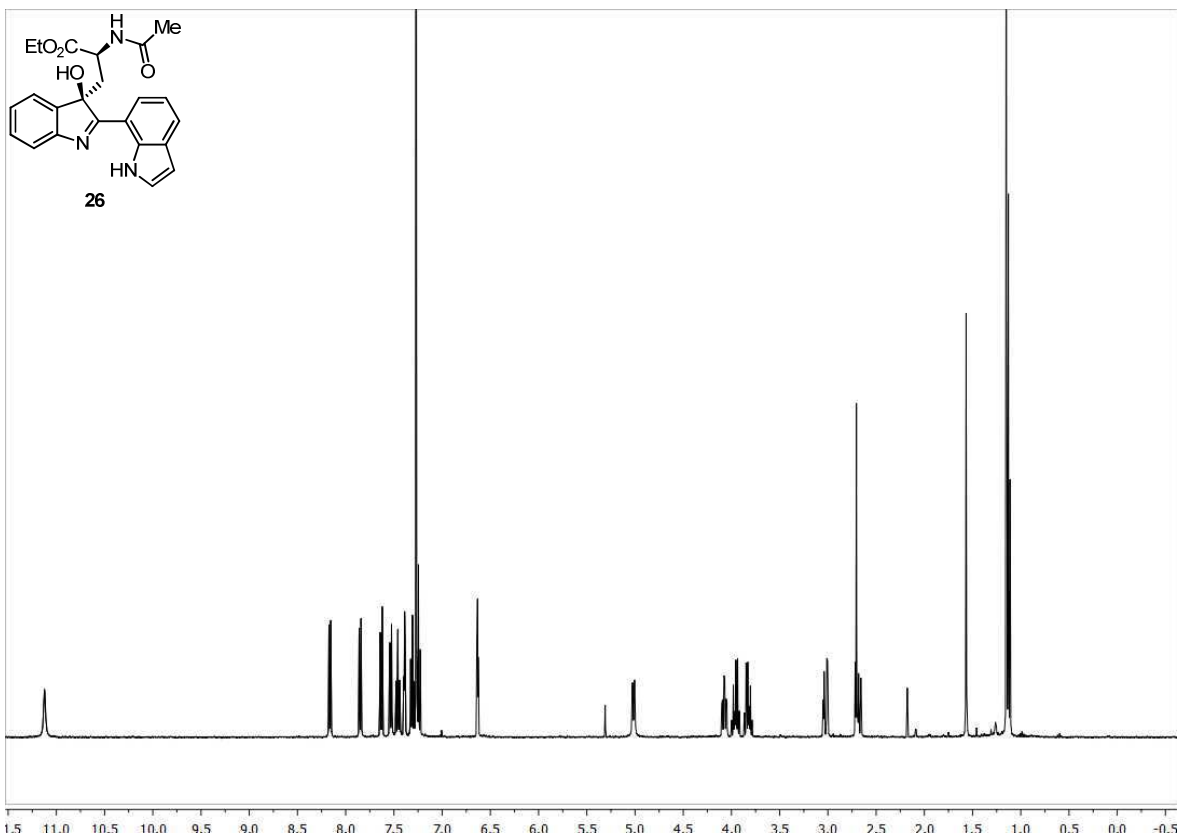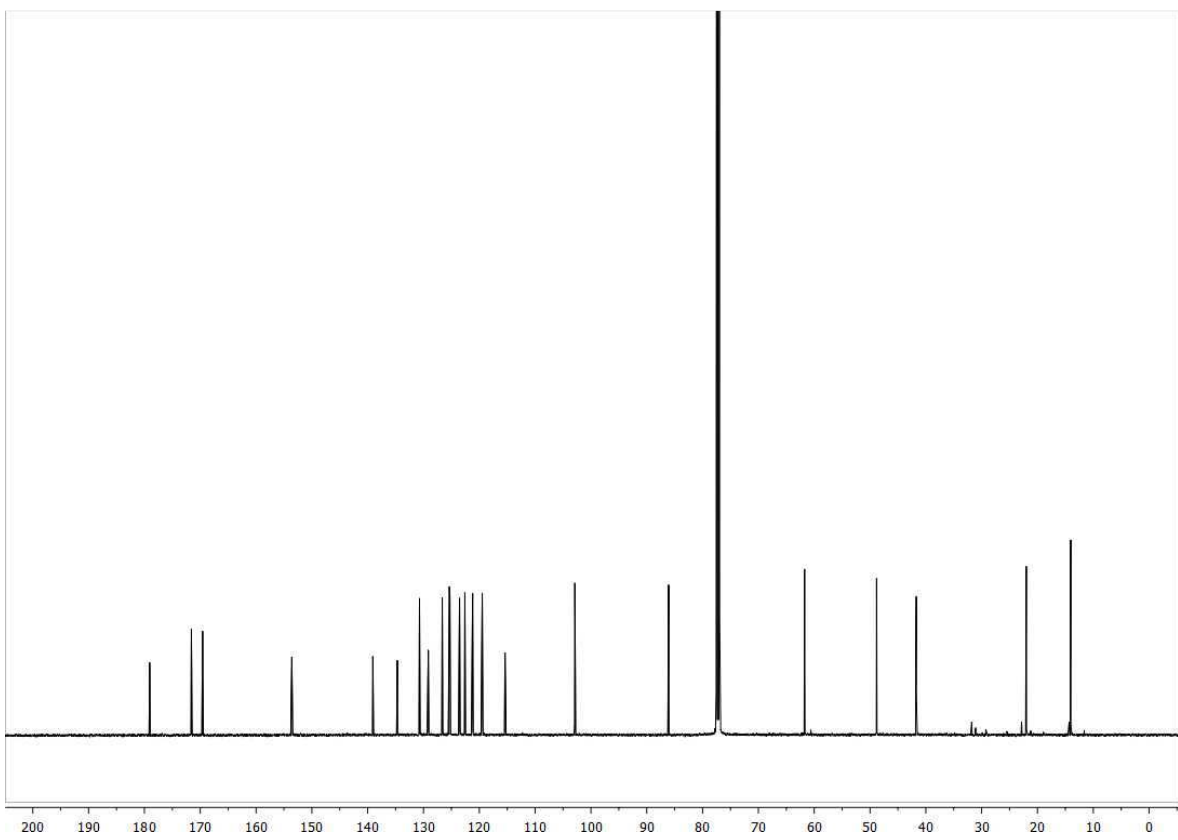

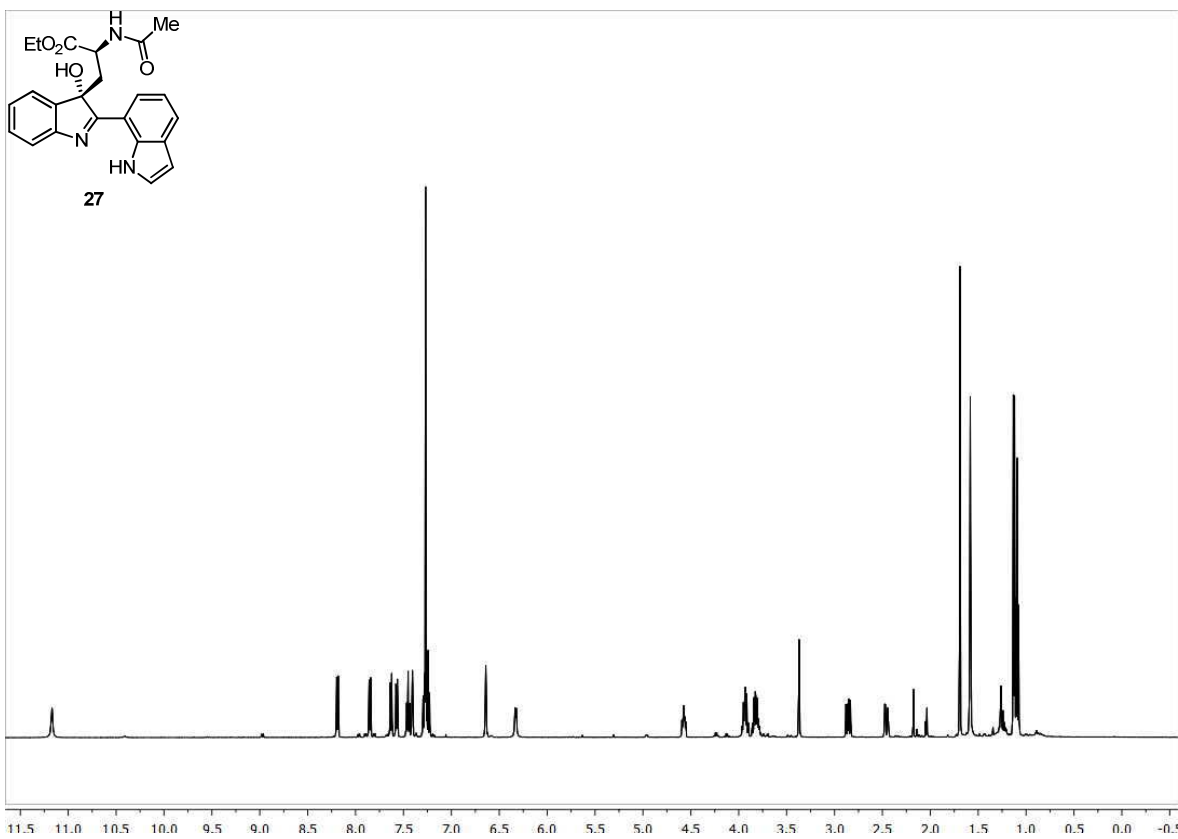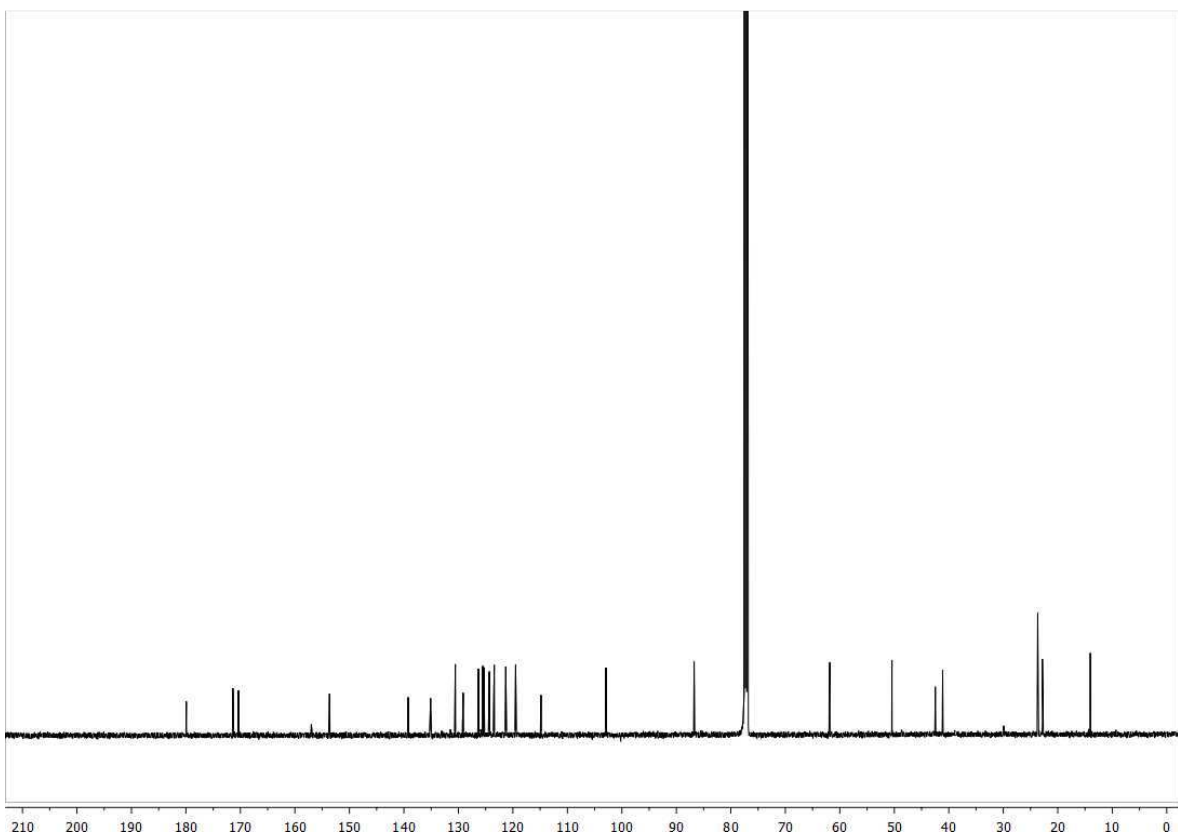

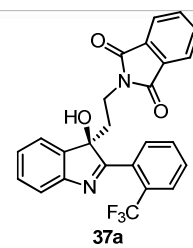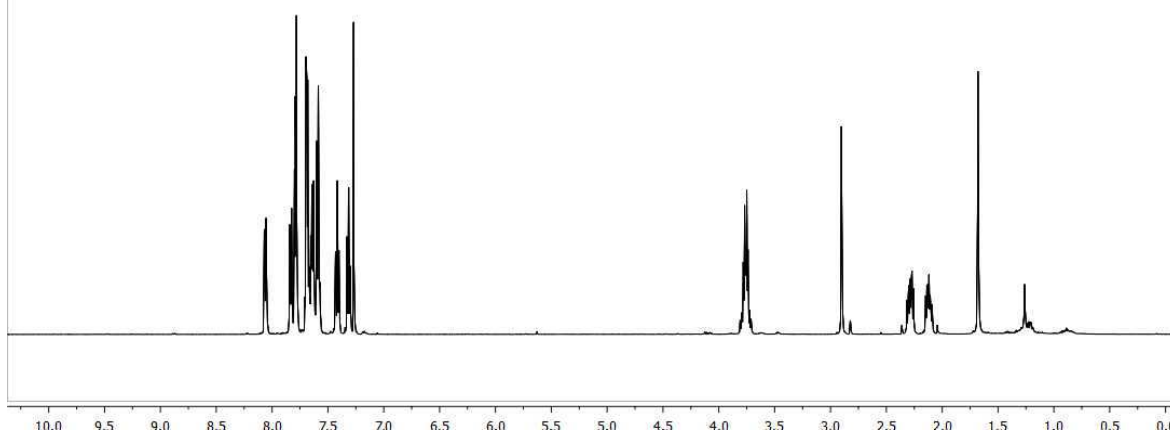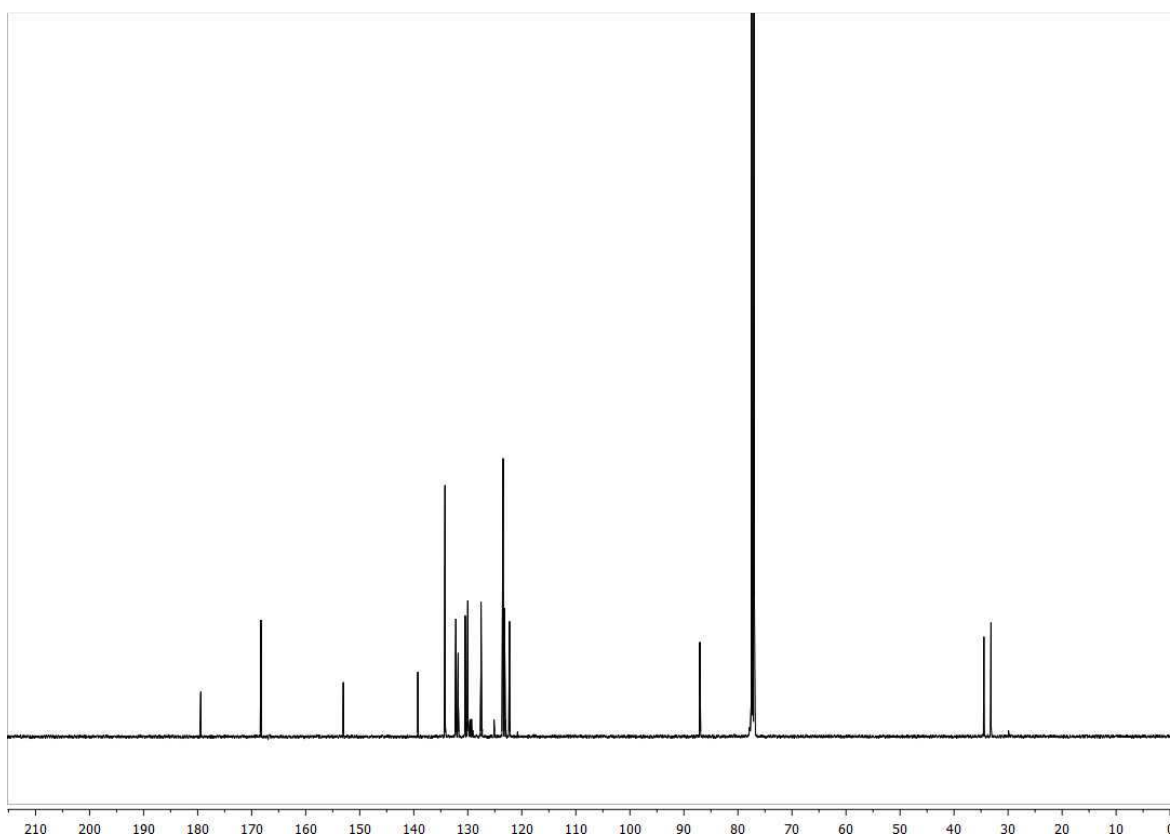

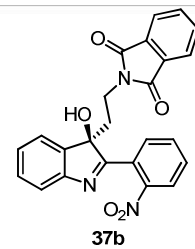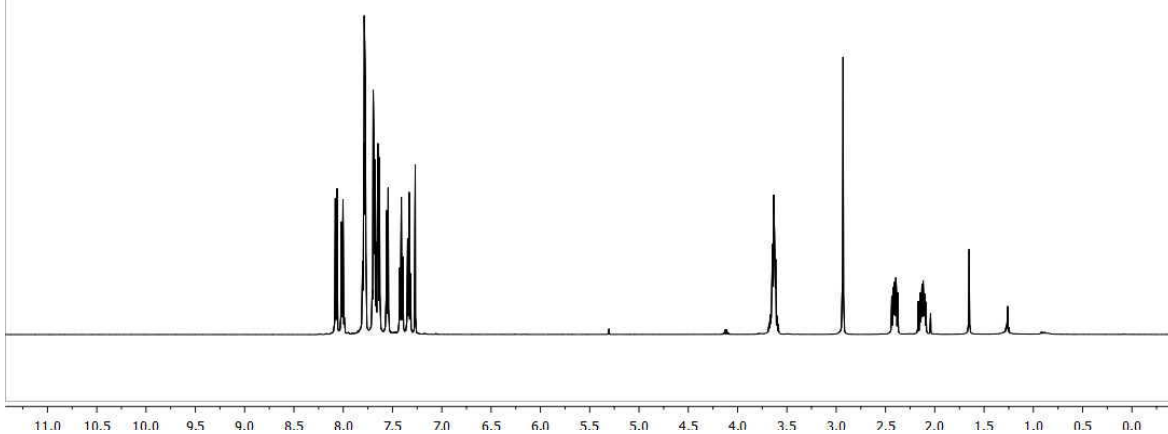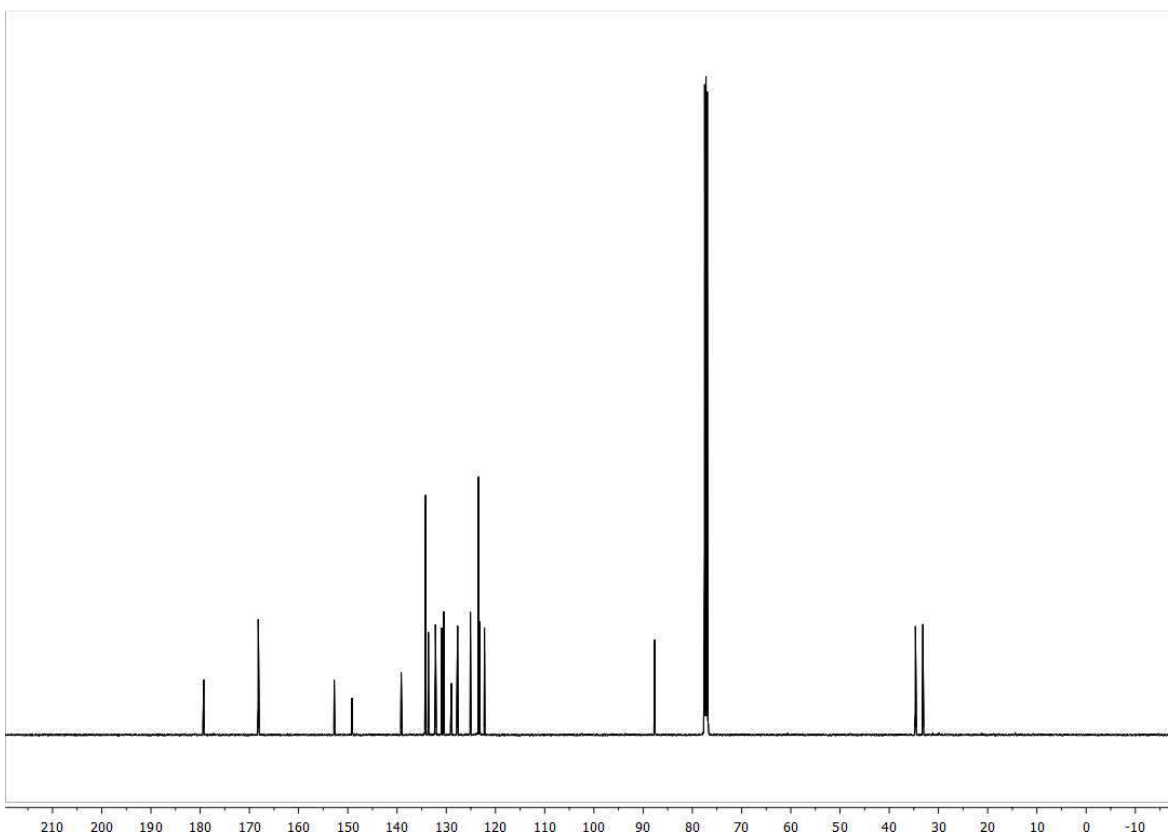

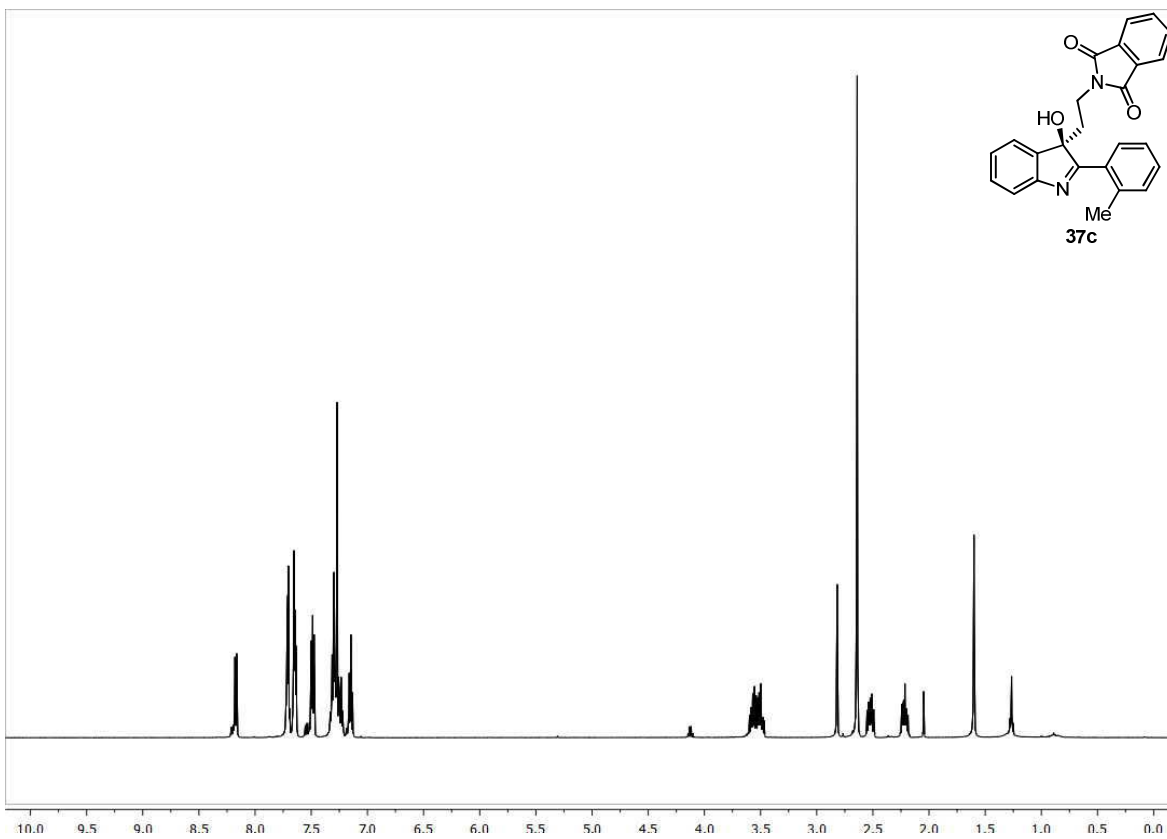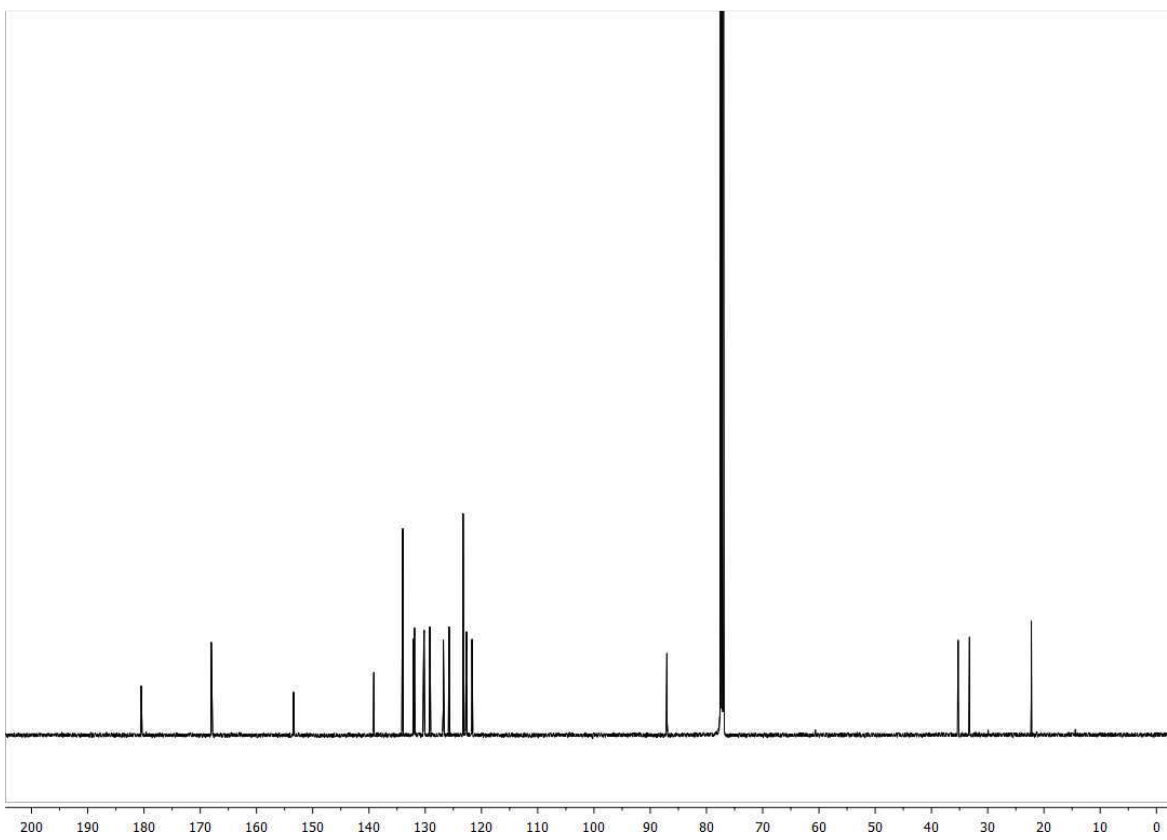

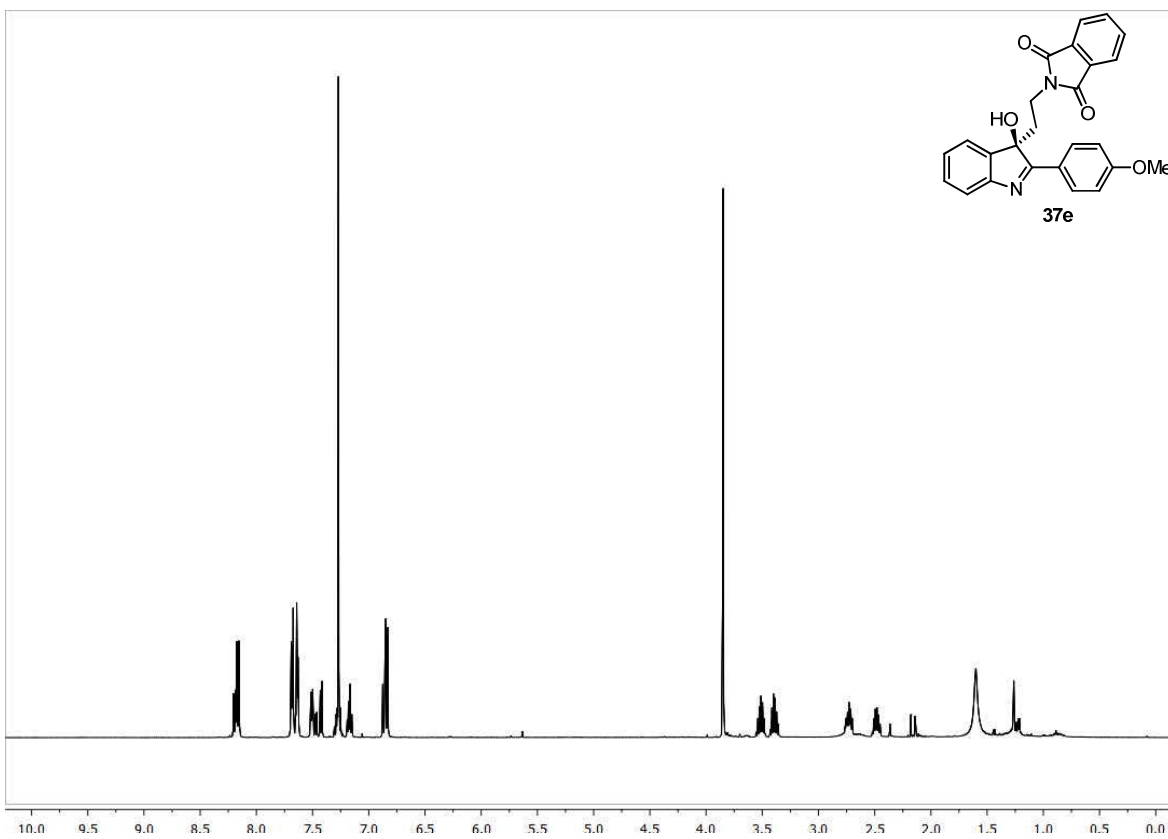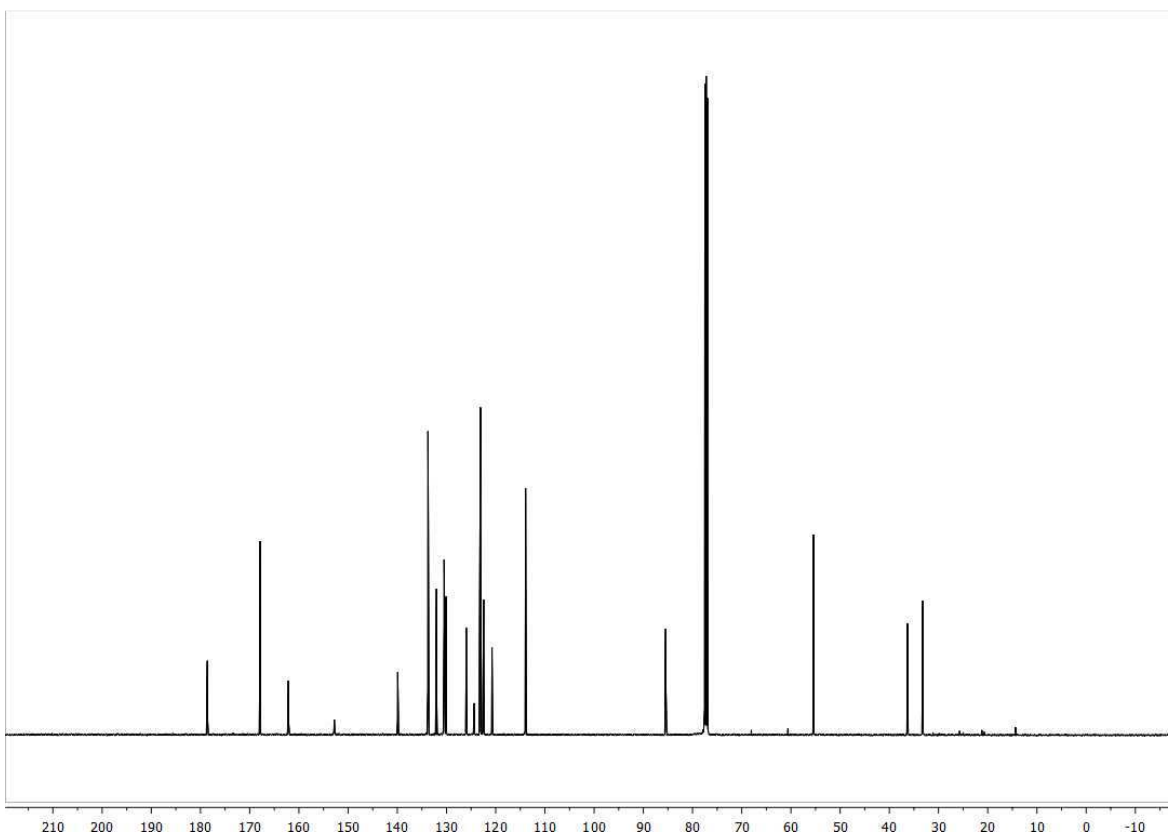



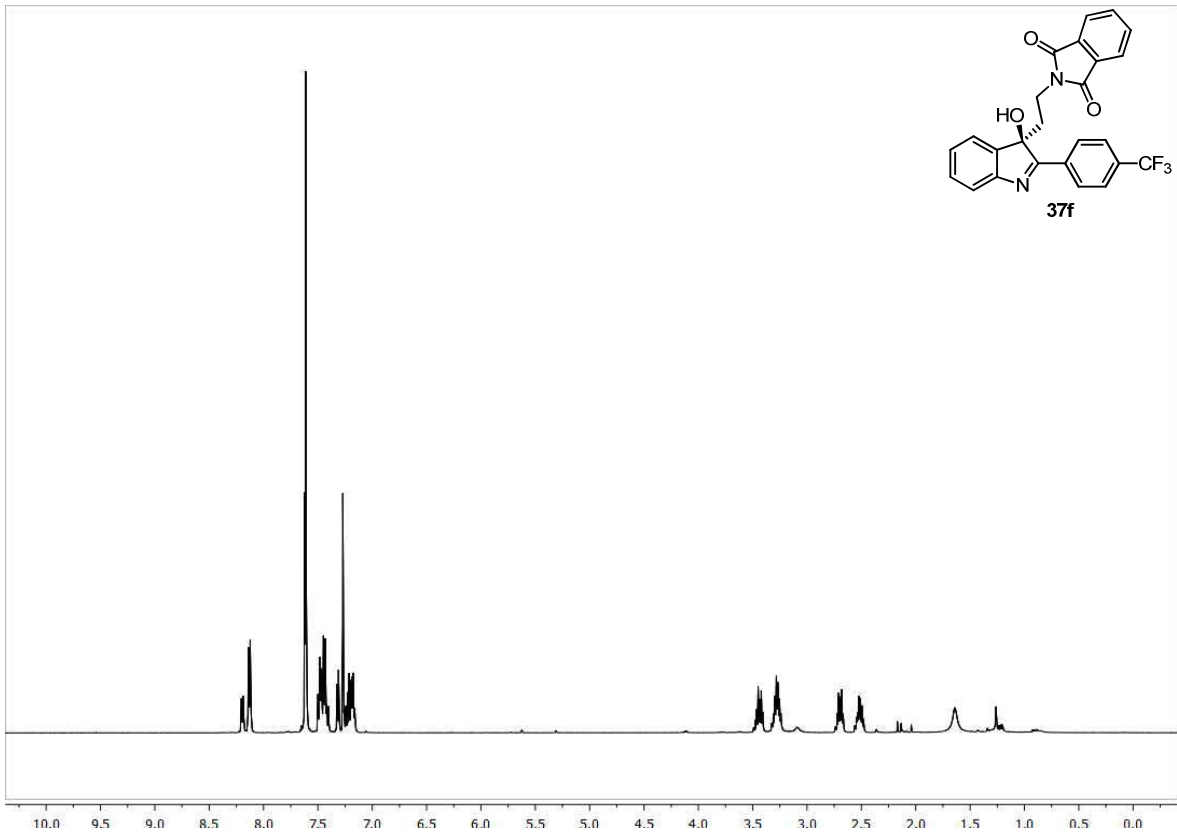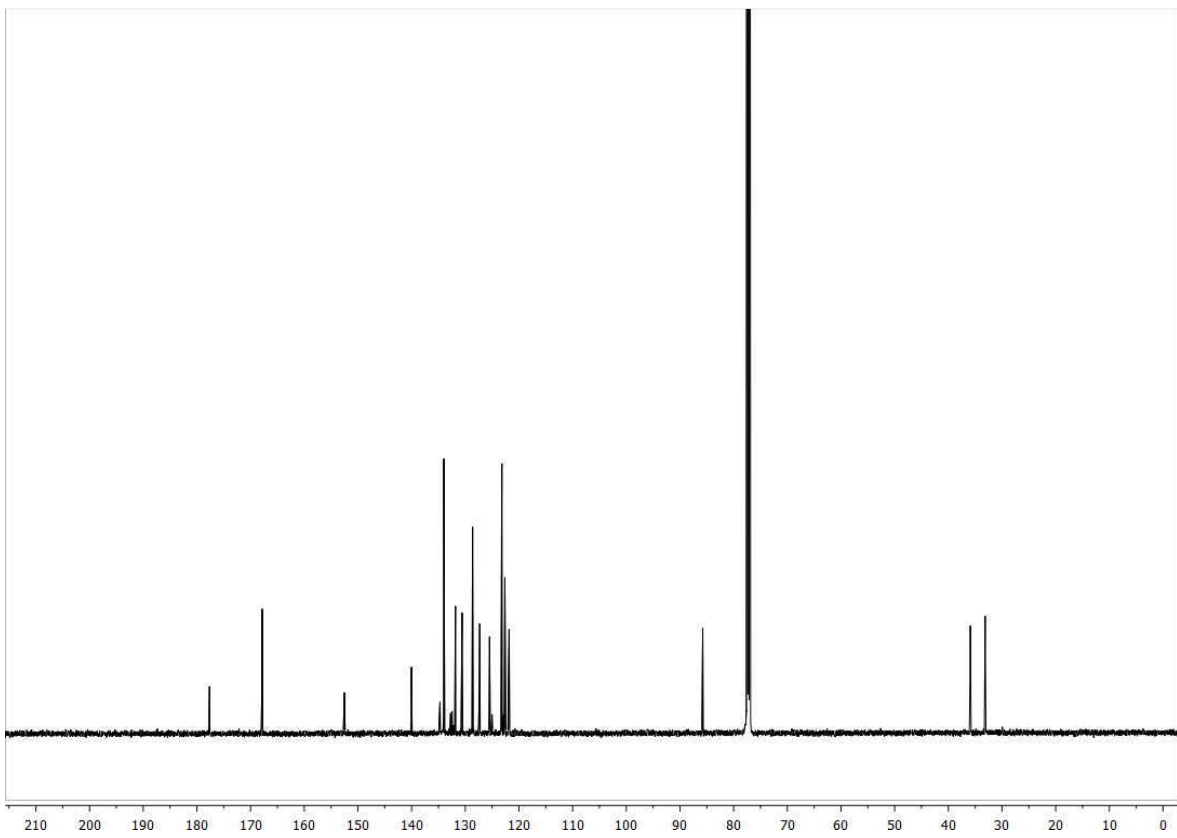

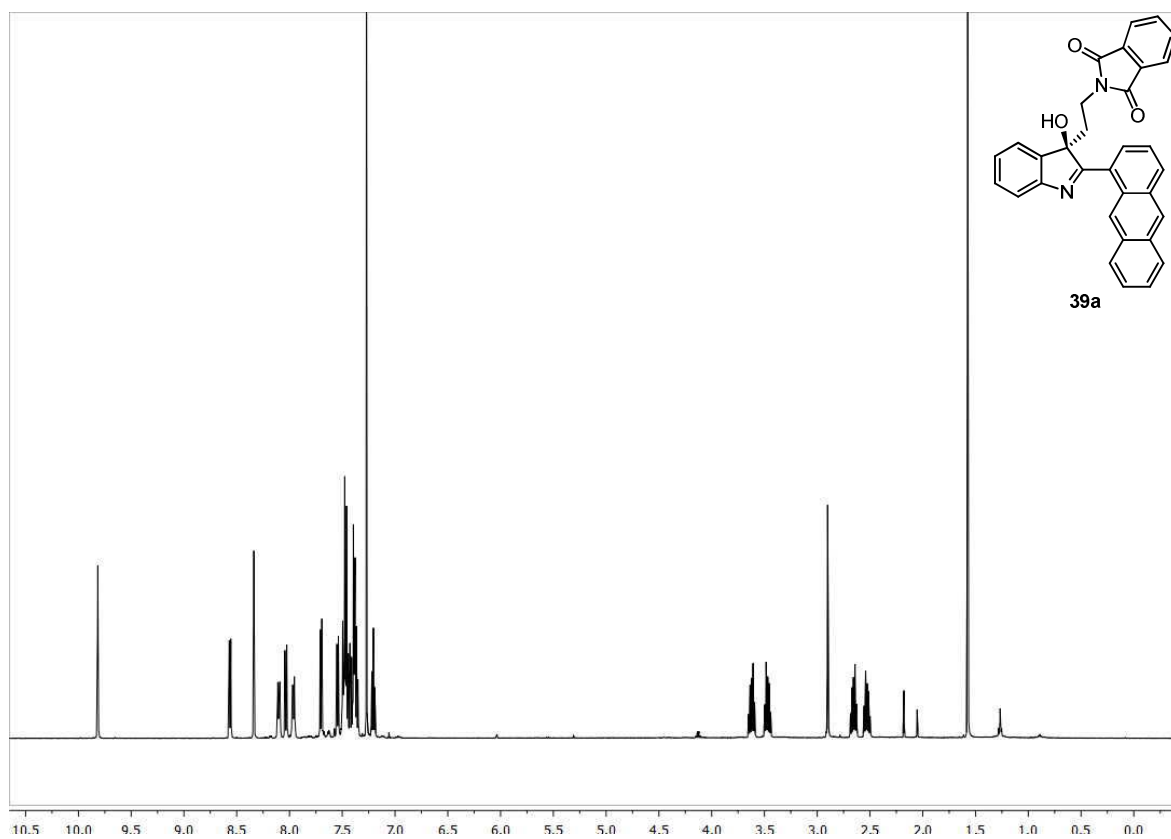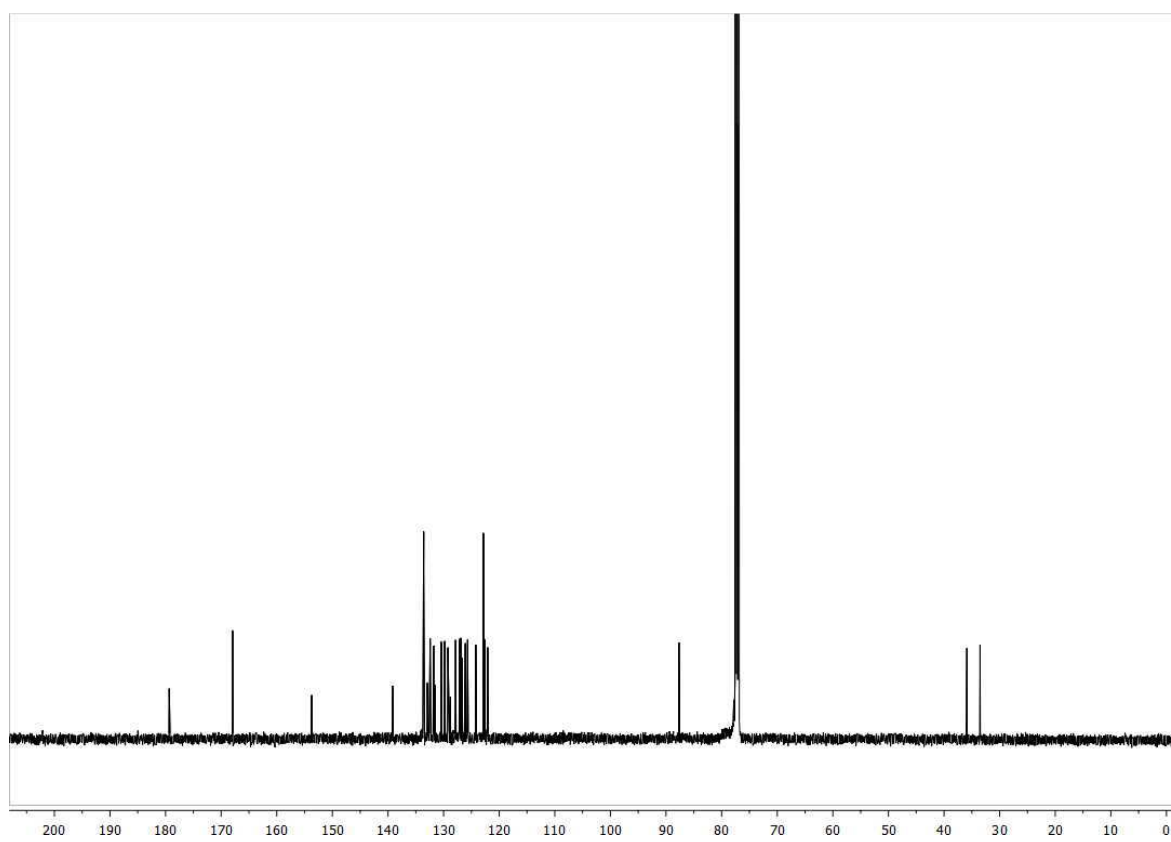

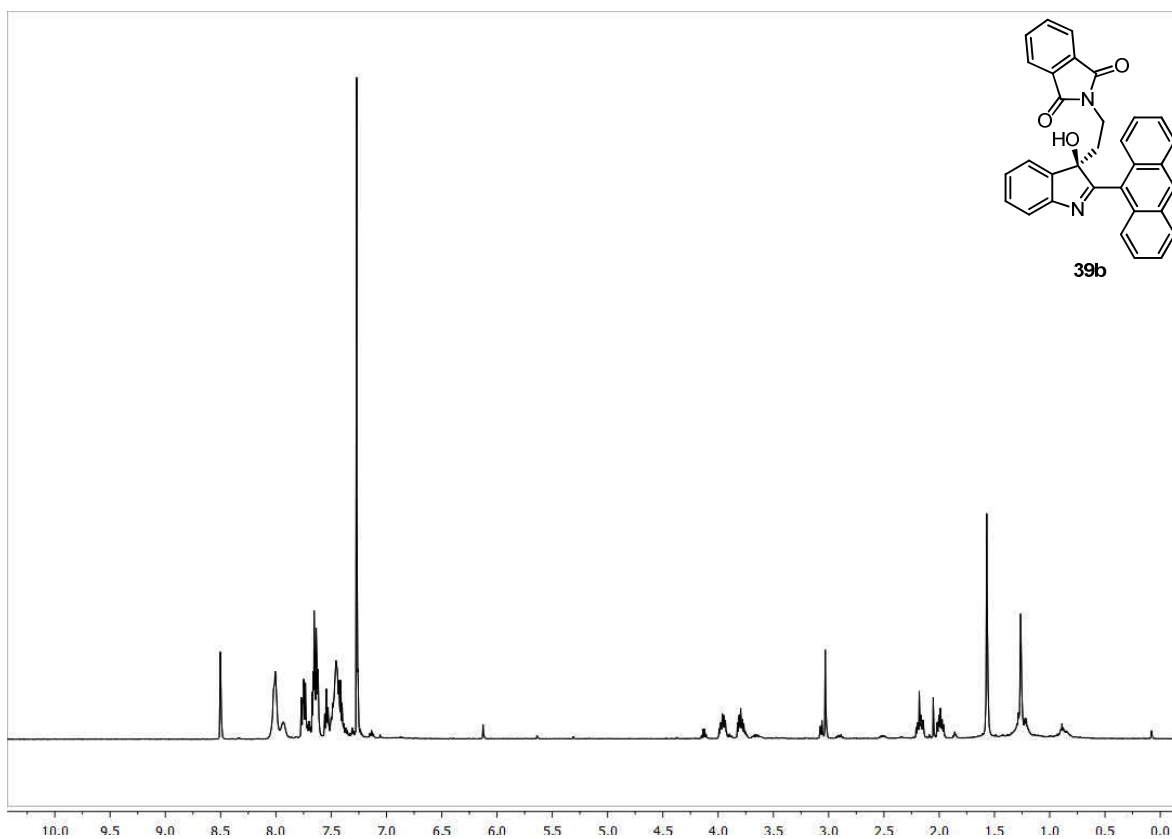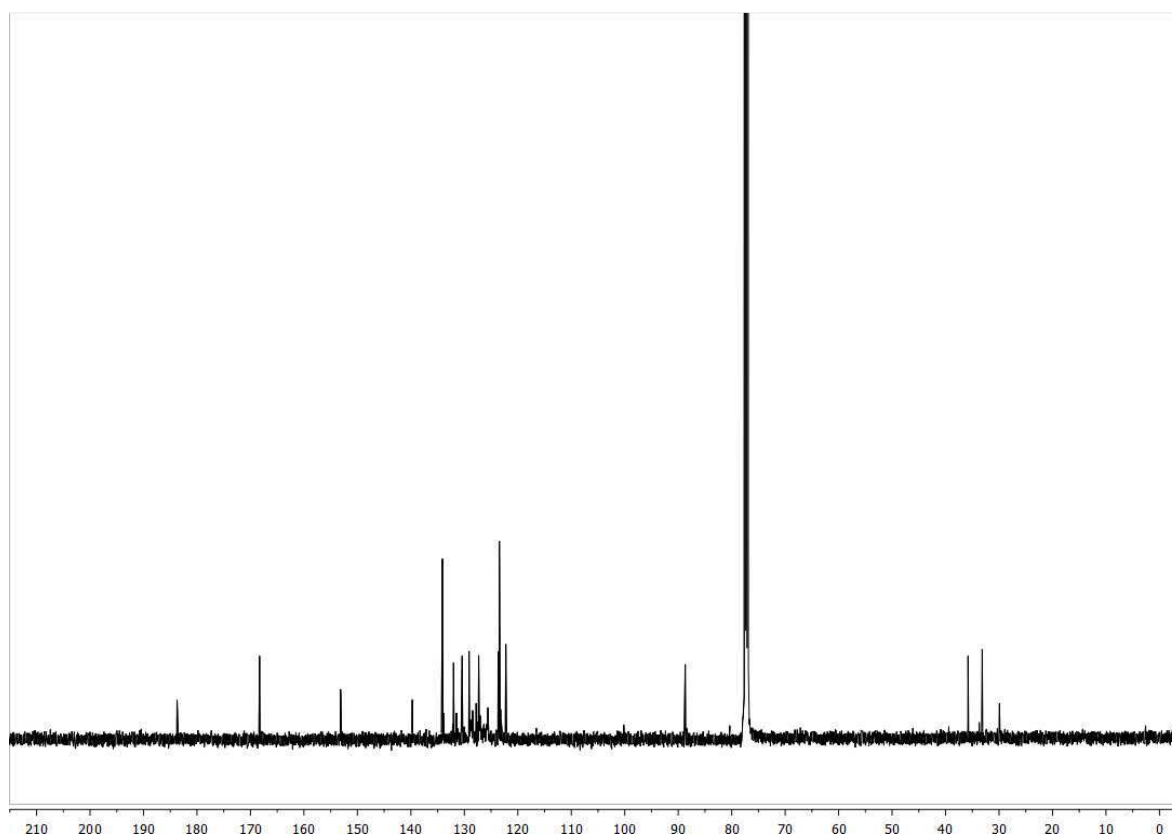

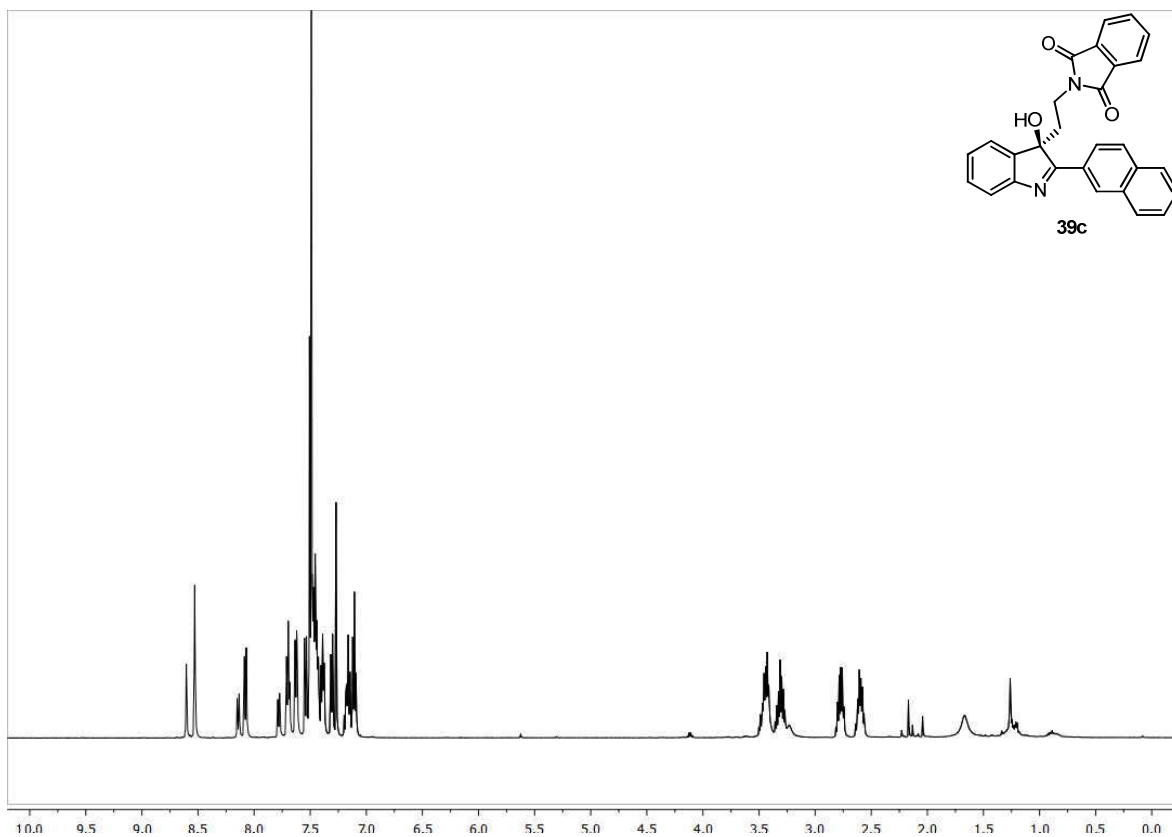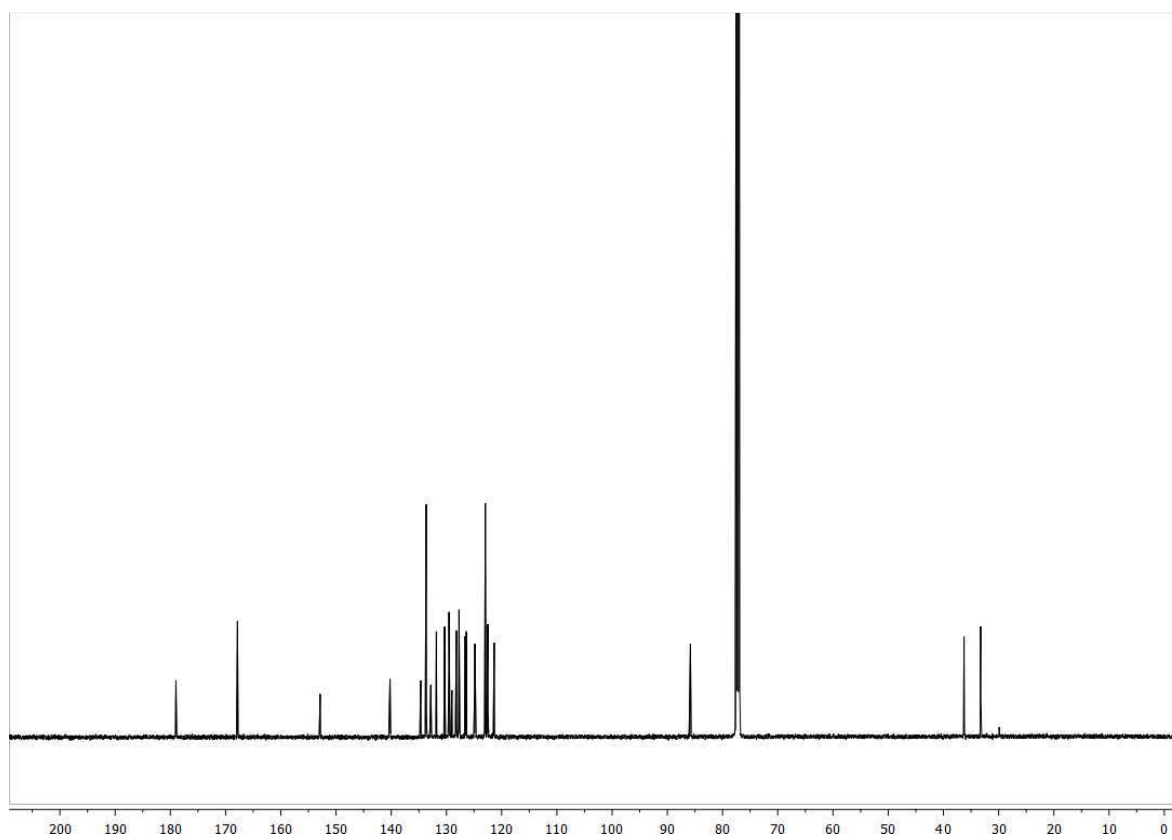

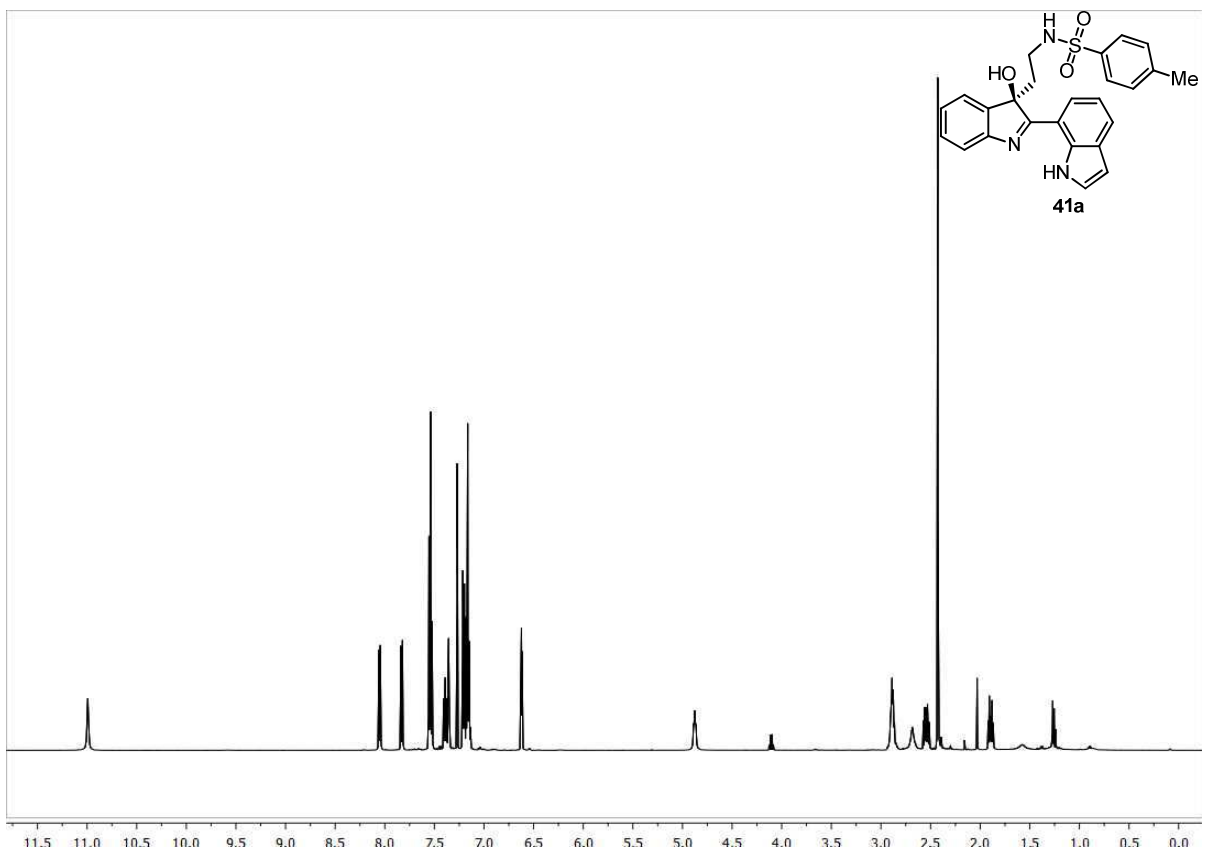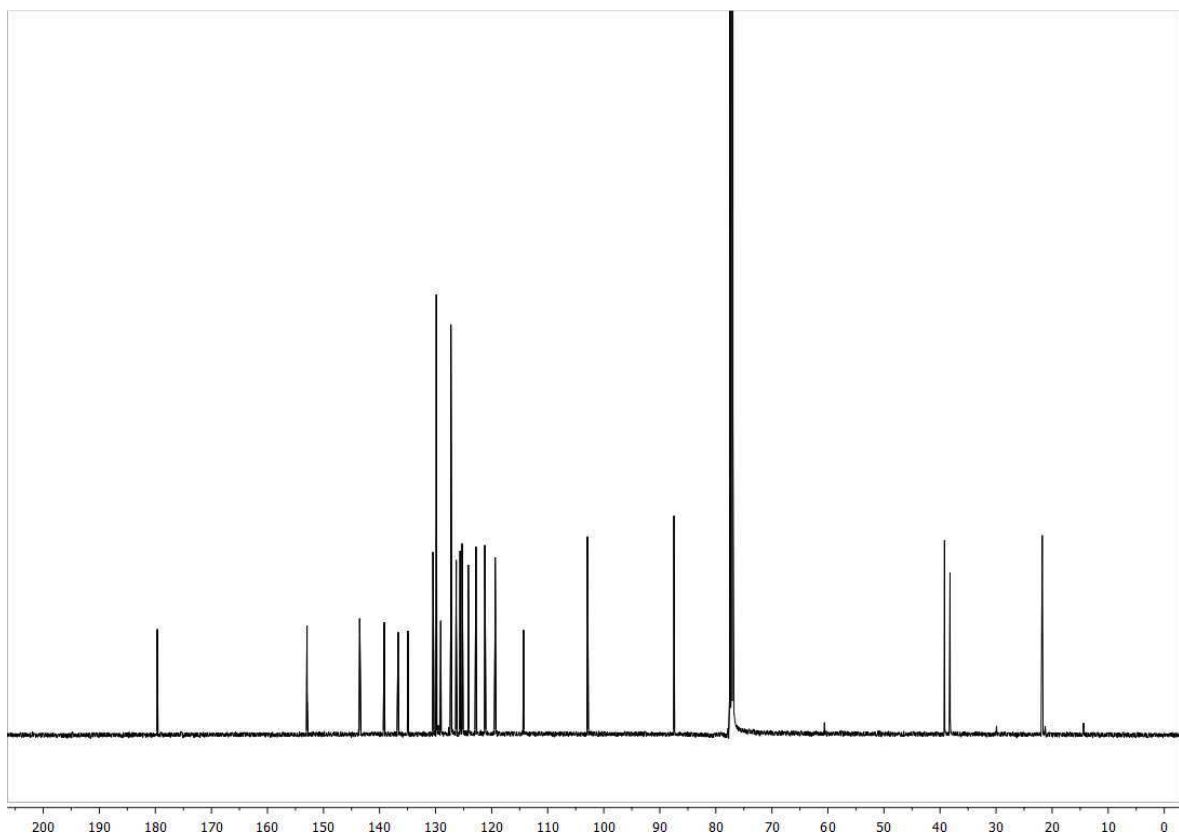

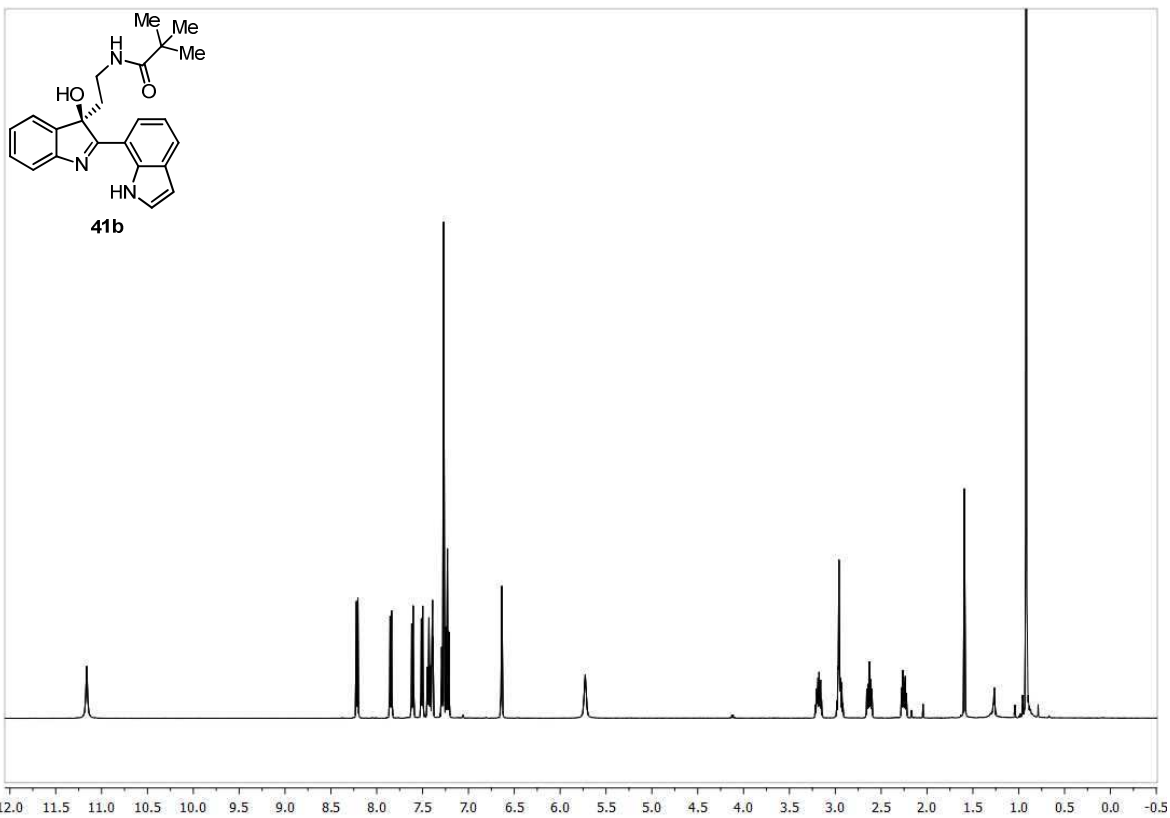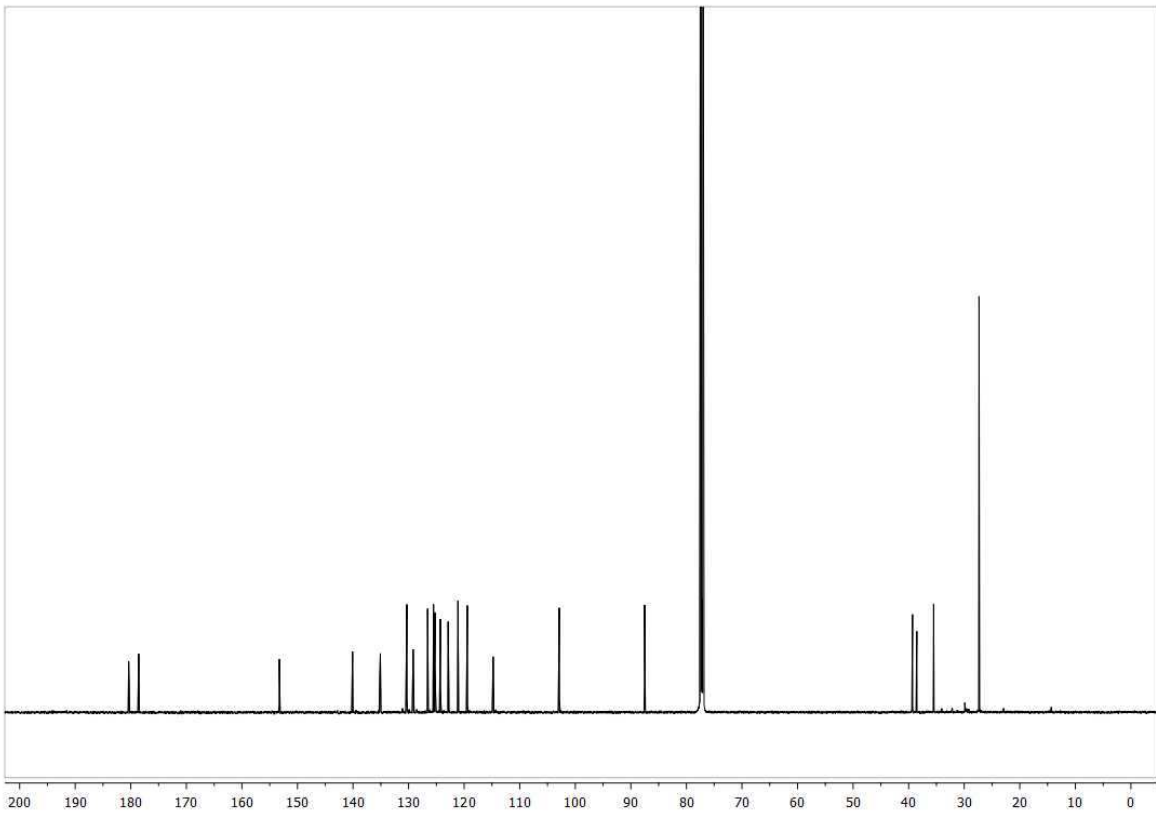

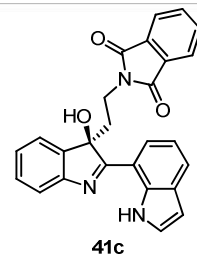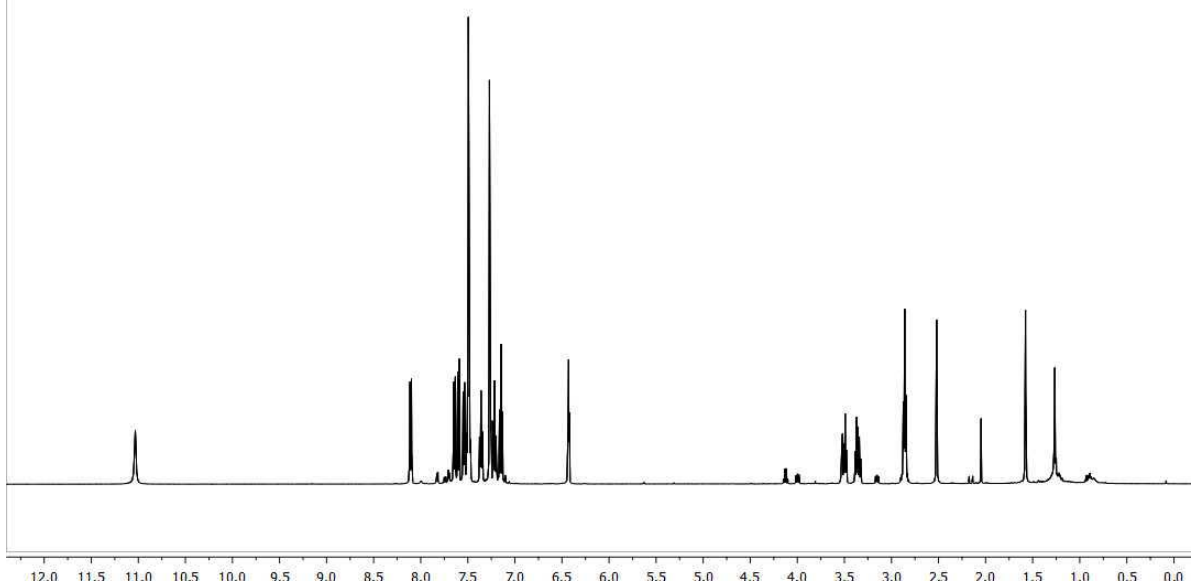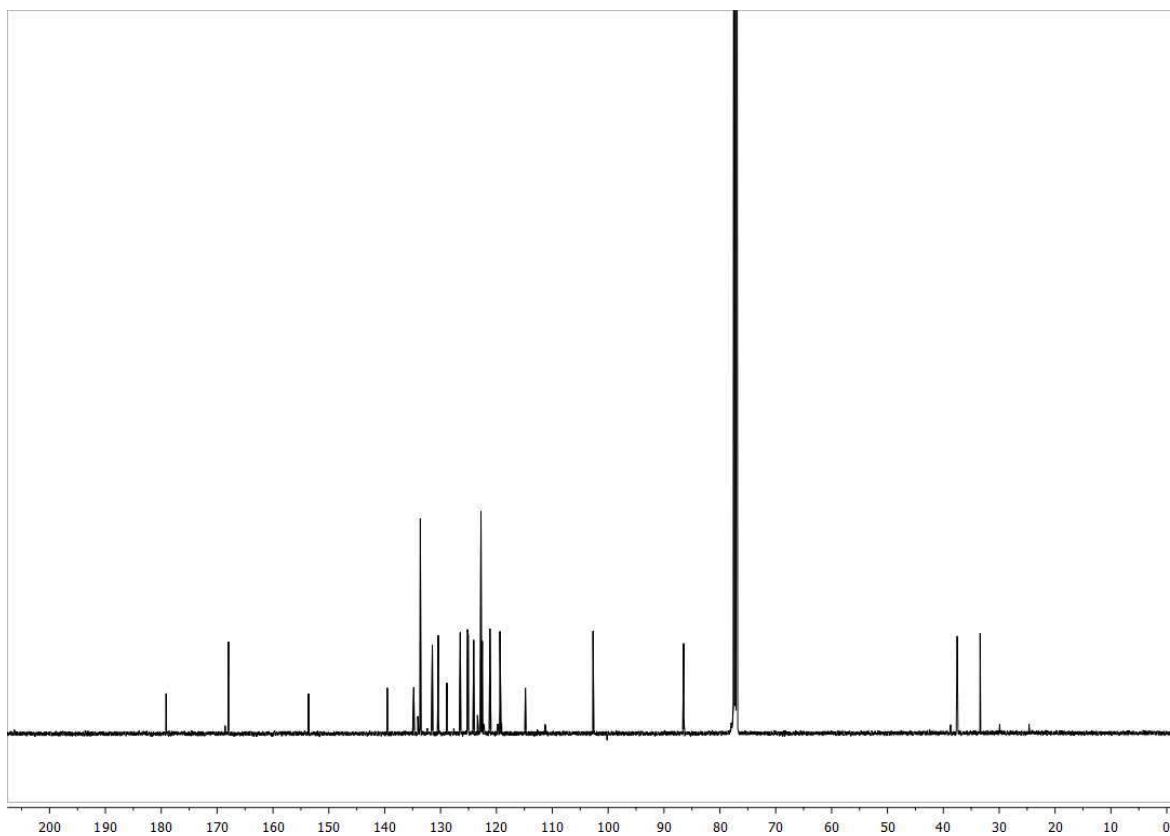

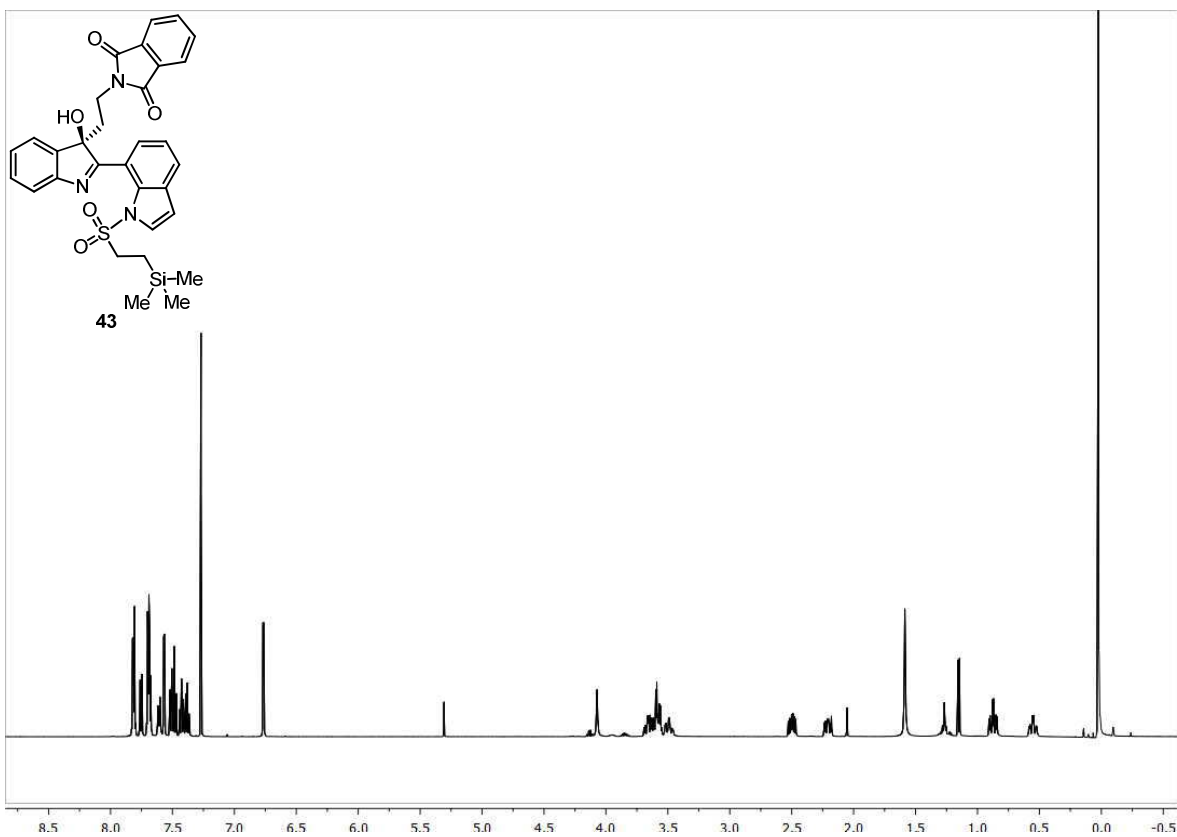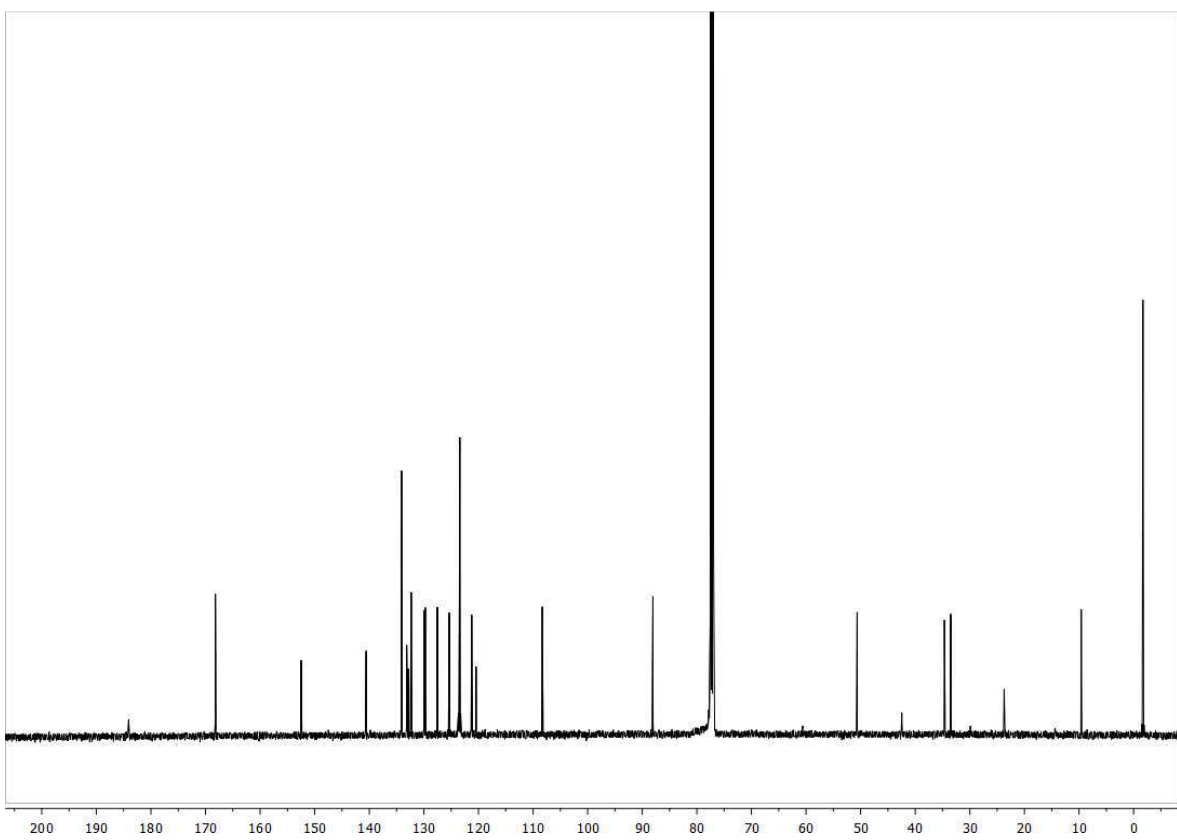



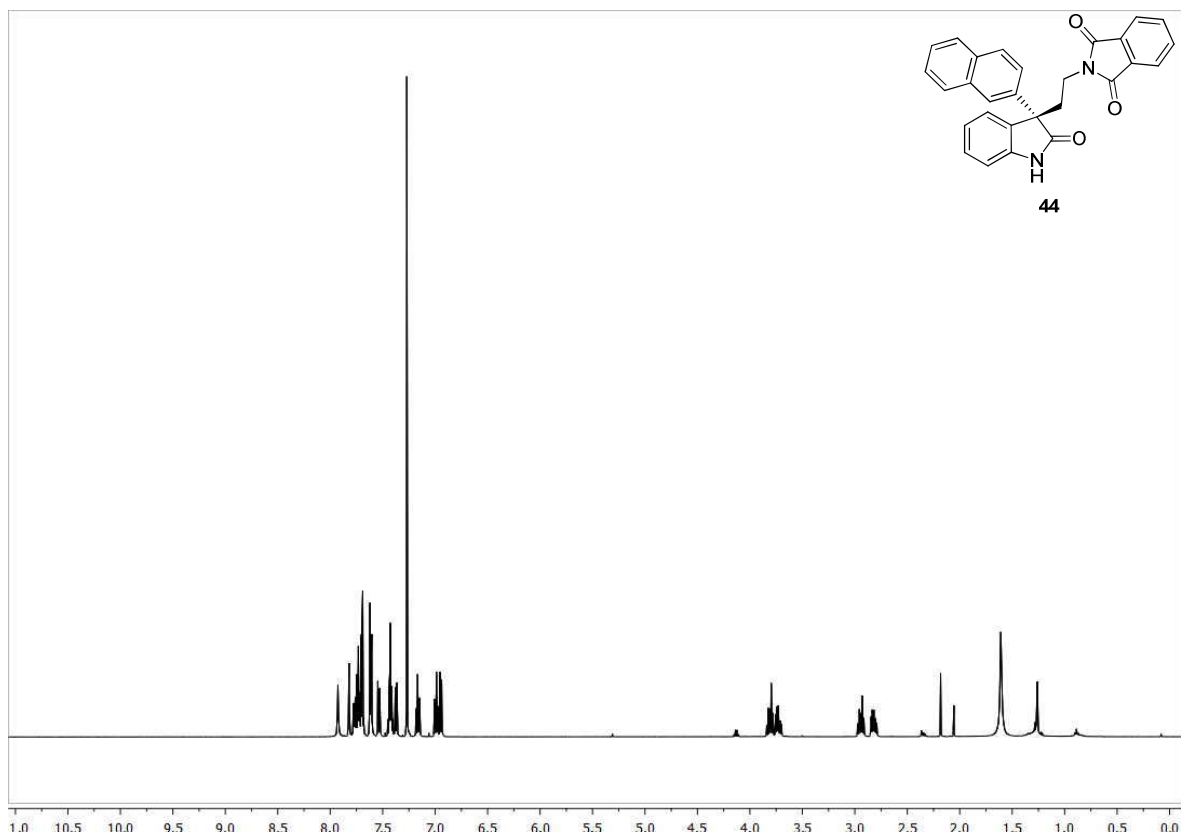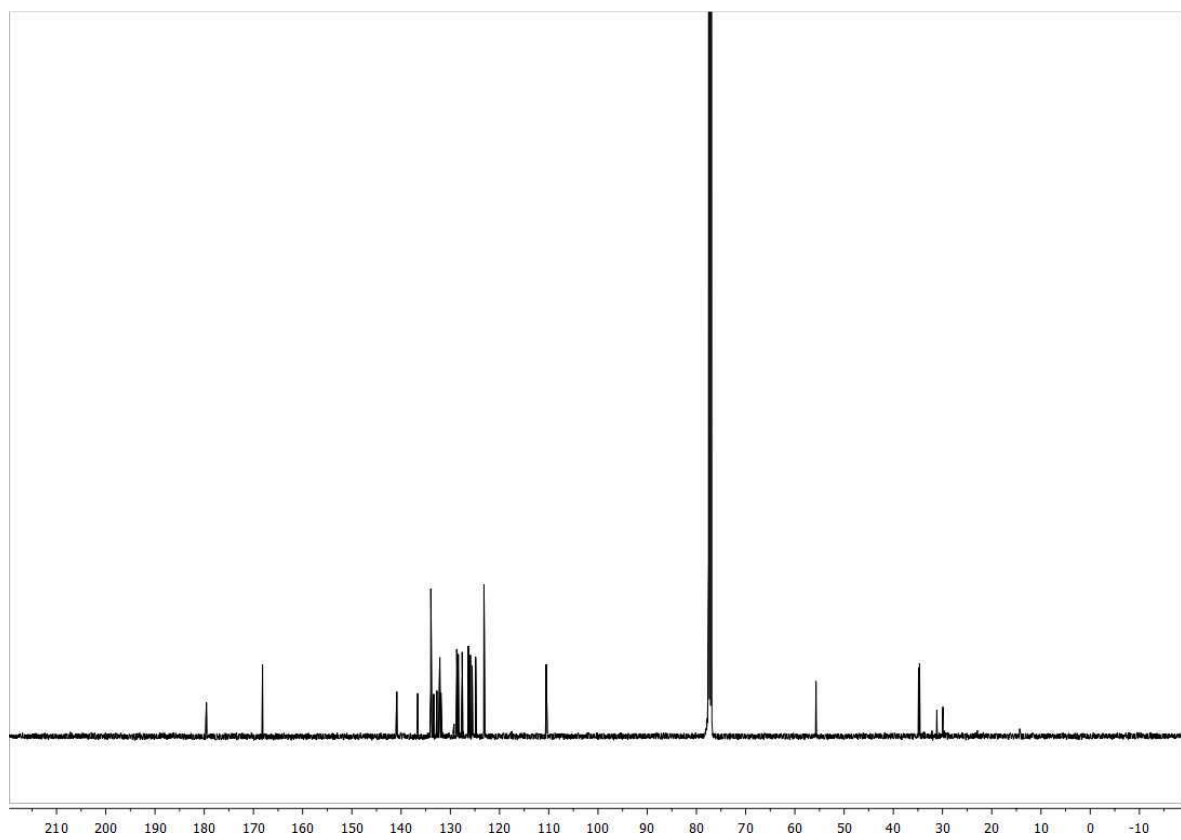

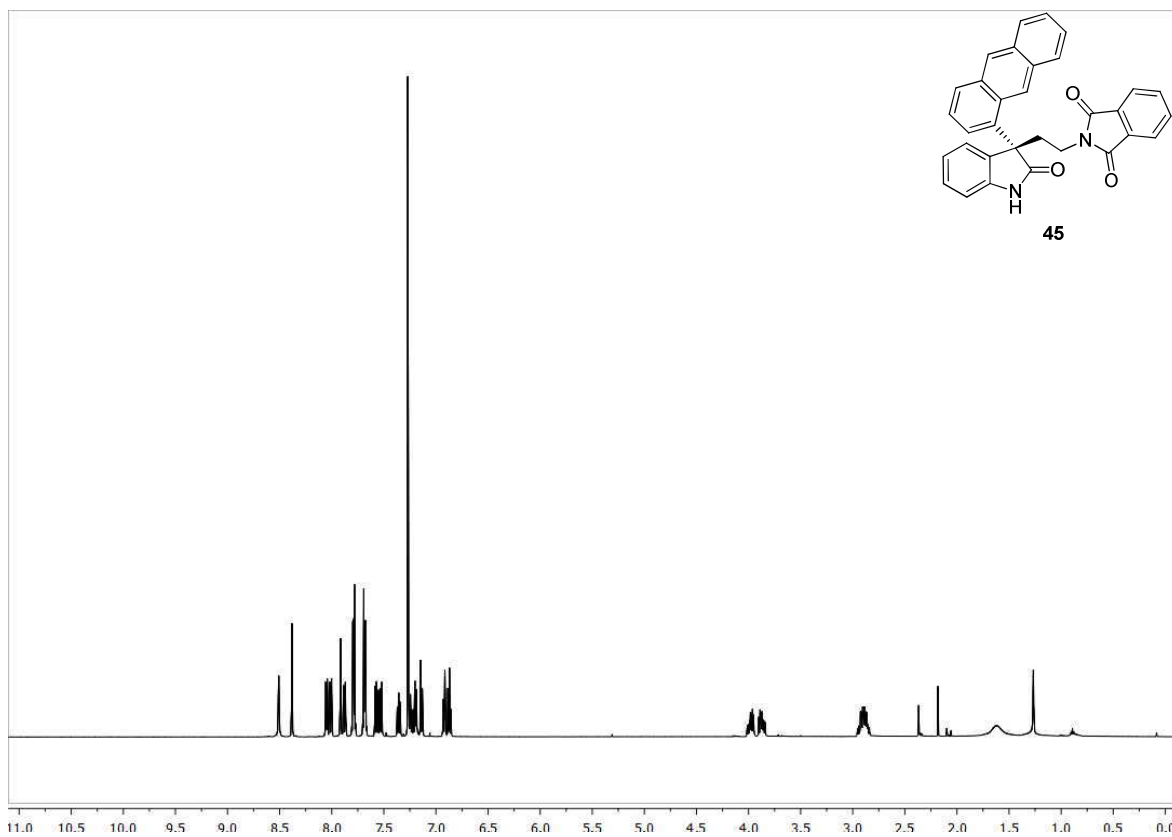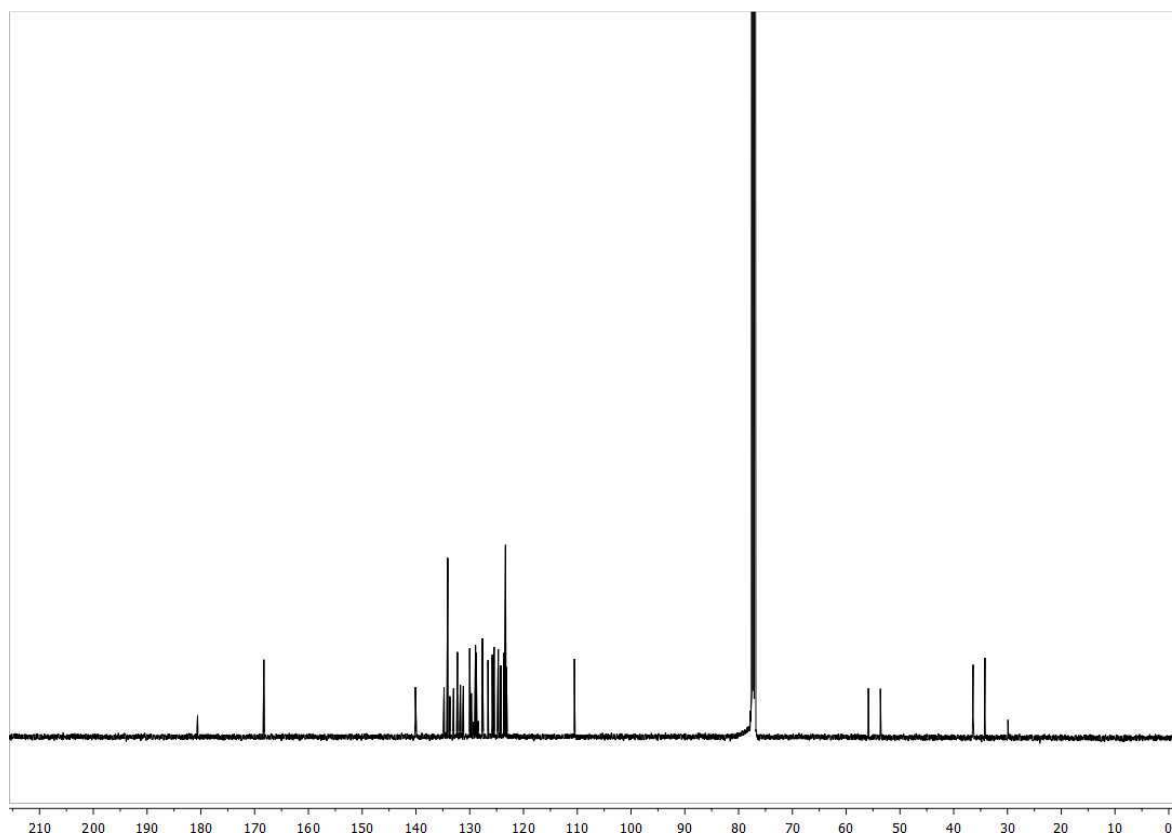

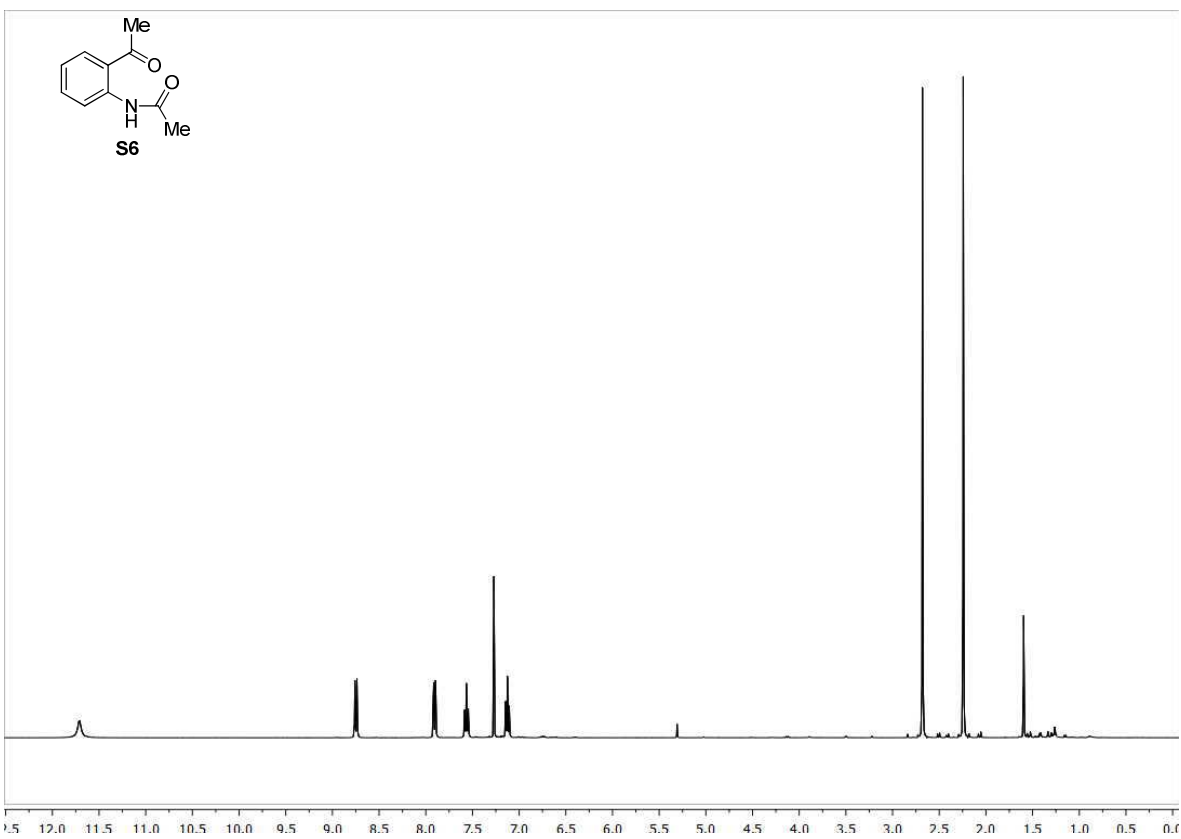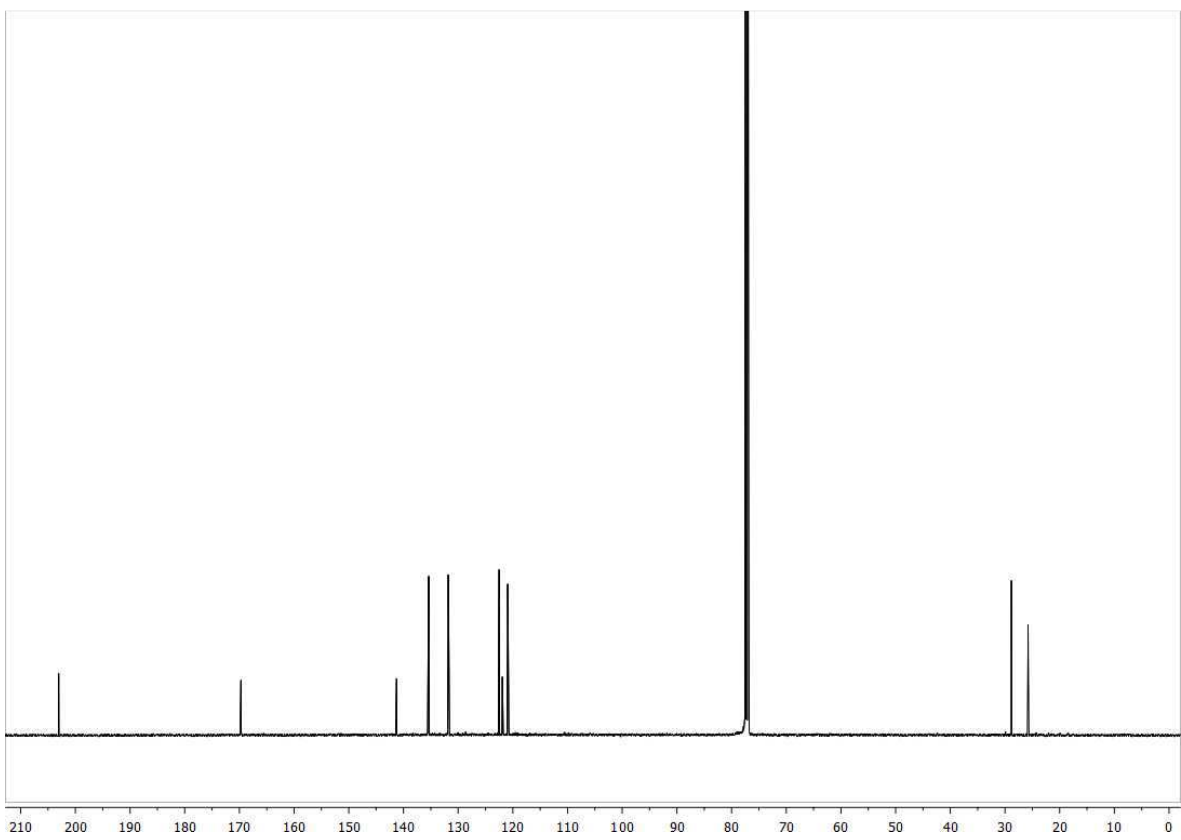

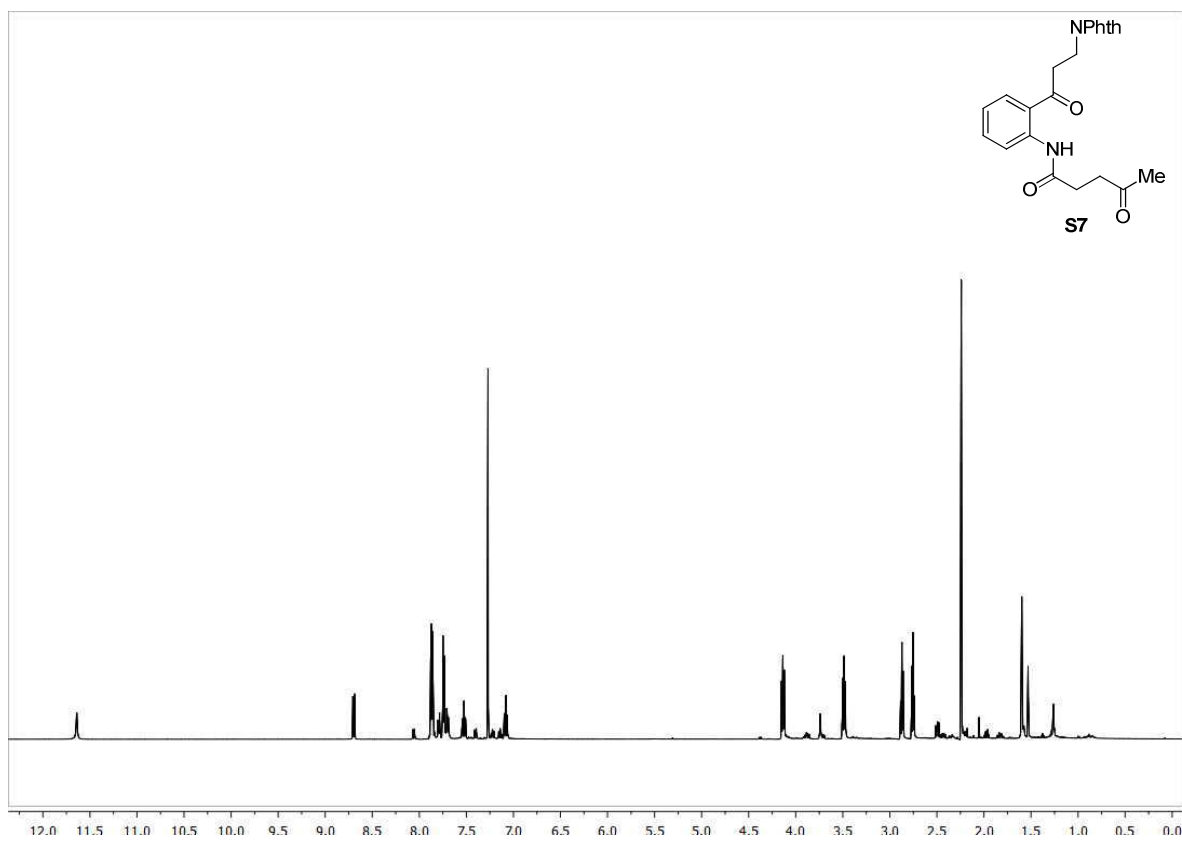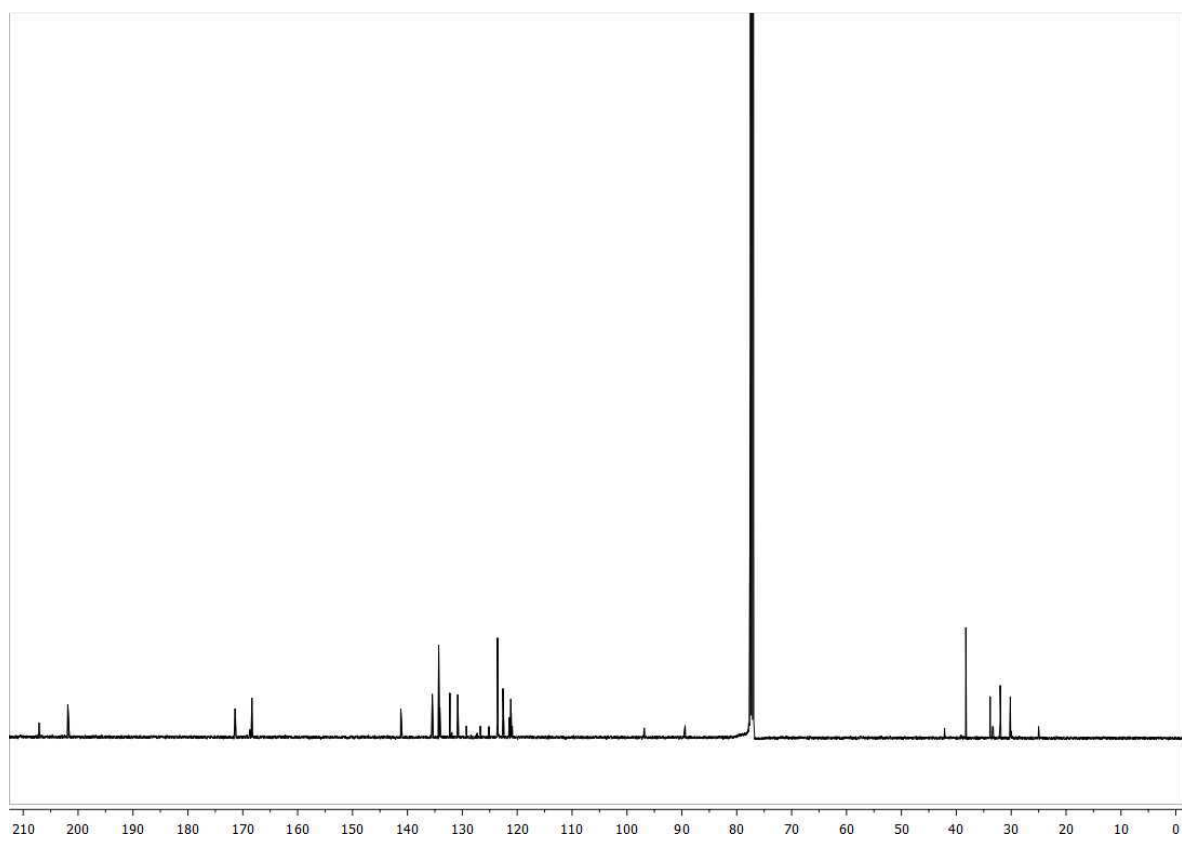

## K. X-Ray Diffraction Report for Compound 41c.

### Experimental

#### *Data Collection*

A colorless block crystal of  $C_{26}H_{19}N_3O_3$  having approximate dimensions of  $0.22 \times 0.22 \times 0.15$  mm was mounted in a loop. All measurements were made on a Rigaku RAXIS RAPID imaging plate area detector with graphite monochromated Cu-K $\alpha$  radiation.

Indexing was performed from 4 oscillations that were exposed for 180 seconds. The crystal-to-detector distance was 127.40 mm.

Cell constants and an orientation matrix for data collection corresponded to a primitive monoclinic cell with dimensions:

$$a = 7.62626(14) \text{ \AA}$$

$$b = 9.13104(17) \text{ \AA} \quad \beta = 92.6325(13)^\circ$$

$$c = 14.3228(3) \text{ \AA}$$

$$V = 996.33(3) \text{ \AA}^3$$

For  $Z = 2$  and F.W. = 421.45, the calculated density is  $1.405 \text{ g/cm}^3$ . Based on the systematic absences of:

$$0k0: k \pm 2n$$

packing considerations, a statistical analysis of intensity distribution, and the successful solution and refinement of the structure, the space group was determined to be:  $P2_1$  (#4)

The data were collected at a temperature of  $-180 \pm 1^\circ\text{C}$  to a maximum  $2\theta$  value of  $136.5^\circ$ . A total of 171 oscillation images were collected. A sweep of data was done using  $\omega$  scans from  $20.0$  to  $200.0^\circ$  in  $5.0^\circ$  step, at  $\chi=0.0^\circ$  and  $\phi = 0.0^\circ$ . The exposure rate was  $36.0 \text{ [sec./}^\circ]$ . A second sweep was performed using  $\omega$  scans from  $20.0$  to  $185.0^\circ$  in  $5.0^\circ$  step, at  $\chi=54.0^\circ$  and  $\phi = 0.0^\circ$ . The exposure rate was  $36.0 \text{ [sec./}^\circ]$ . Another sweep was performed using  $\omega$  scans from  $21.0$  to  $191.0^\circ$  in  $5.0^\circ$  step, at  $\chi=54.0^\circ$  and  $\phi = 90.0^\circ$ . The exposure rate was  $36.0 \text{ [sec./}^\circ]$ . Another sweep was performed using  $\omega$  scans from  $20.0$  to  $200.0^\circ$  in  $5.0^\circ$  step, at  $\chi=54.0^\circ$  and  $\phi = 270.0^\circ$ . The exposure rate was  $36.0 \text{ [sec./}^\circ]$ . Another sweep was performed using  $\omega$  scans from  $24.0$  to  $184.0^\circ$  in  $5.0^\circ$  step, at  $\chi=54.0^\circ$  and  $\phi = 180.0^\circ$ . The exposure rate was  $36.0 \text{ [sec./}^\circ]$ . The crystal-to-detector distance was 127.40 mm. Readout was performed in the 0.100 mm pixel mode.

#### *Data Reduction*

Of the 10803 reflections that were collected, 3418 were unique ( $R_{\text{int}} = 0.030$ ).

The linear absorption coefficient,  $\mu$ , for Cu-K $\alpha$  radiation is  $7.601 \text{ cm}^{-1}$ . An empirical absorption correction was applied which resulted in transmission factors ranging from 0.781 to 0.892. The data were corrected for Lorentz and polarization effects.

## Structure Solution and Refinement

The structure was solved by direct methods<sup>7</sup> and expanded using Fourier techniques<sup>8</sup>. The non-hydrogen atoms were refined anisotropically. Hydrogen atoms were refined using the riding model. The final cycle of full-matrix least-squares refinement<sup>9</sup> on  $F^2$  was based on 3413 observed reflections and 298 variable parameters and converged (largest parameter shift was 0.00 times its esd) with unweighted and weighted agreement factors of:

$$R1 = \sum ||F_o| - |F_c|| / \sum |F_o| = 0.0305$$

$$wR2 = [ \sum ( w (F_o^2 - F_c^2)^2 ) / \sum w(F_o^2)^2 ]^{1/2} = 0.0770$$

The standard deviation of an observation of unit weight<sup>10</sup> was 1.08. Unit weights were used. The maximum and minimum peaks on the final difference Fourier map corresponded to 0.18 and -0.16 e<sup>-</sup>/Å<sup>3</sup>, respectively. The absolute structure was deduced based on Flack parameter, 0.24(17), using 1489 Friedel pairs.<sup>11</sup>

Neutral atom scattering factors were taken from Cromer and Waber<sup>12</sup>. Anomalous dispersion effects were included in  $F_{\text{calc}}$ <sup>13</sup>; the values for  $\Delta f'$  and  $\Delta f''$  were those of Creagh and McAuley<sup>14</sup>. The values for the mass attenuation coefficients are those of Creagh and Hubbell<sup>15</sup>. All calculations were performed using the CrystalStructure<sup>16</sup> crystallographic software package except for refinement, which was performed using SHELXL-97<sup>17</sup>.

## Experimental Details

### a. Crystal Data

|                      |                                                               |
|----------------------|---------------------------------------------------------------|
| Empirical Formula    | C <sub>26</sub> H <sub>19</sub> N <sub>3</sub> O <sub>3</sub> |
| Formula Weight       | 421.45                                                        |
| Crystal Color, Habit | colorless, block                                              |
| Crystal Dimensions   | 0.22 × 0.22 × 0.15 mm                                         |
| Crystal System       | monoclinic                                                    |
| Lattice Type         | Primitive                                                     |
| Indexing Images      | 4 oscillations @ 180.0 seconds                                |
| Detector Position    | 127.40 mm                                                     |
| Pixel Size           | 0.100 mm                                                      |
| Lattice Parameters   | a = 7.62626(14) Å<br>b = 9.13104(17) Å<br>c = 14.3228(3) Å    |

$$\beta = 92.6325(13)^\circ$$

$$V = 996.33(3) \text{ \AA}^3$$

|                         |                         |
|-------------------------|-------------------------|
| Space Group             | P2 <sub>1</sub> (#4)    |
| Z value                 | 2                       |
| D <sub>calc</sub>       | 1.405 g/cm <sup>3</sup> |
| F <sub>000</sub>        | 440.00                  |
| $\mu(\text{CuK}\alpha)$ | 7.601 cm <sup>-1</sup>  |

### ***b. Intensity Measurements***

Diffractionmeter Rigaku RAXIS-RAPID

Radiation CuK $\alpha$  ( $\lambda = 1.54187 \text{ \AA}$ )  
graphite monochromated

Detector Aperture 280 mm  $\times$  256 mm

Data Images 171 exposures

$\omega$  oscillation Range ( $\chi=0.0, \varphi=0.0$ ) 20.0 - 200.0°

Exposure Rate 36.0 sec./°

$\omega$  oscillation Range ( $\chi=54.0, \varphi=0.0$ ) 20.0 - 185.0°

Exposure Rate 36.0 sec./°

$\omega$  oscillation Range ( $\chi=54.0, \varphi=90.0$ ) 21.0 - 191.0°

Exposure Rate 36.0 sec./°

$\omega$  oscillation Range ( $\chi=54.0, \varphi=270.0$ ) 20.0 - 200.0°

Exposure Rate 36.0 sec./°

$\omega$  oscillation Range ( $\chi=54.0, \varphi=180.0$ ) 24.0 - 184.0°

Exposure Rate 36.0 sec./°

Detector Position 127.40 mm

Pixel Size 0.100 mm

$2\theta_{\text{max}}$  136.5°

No. of Reflections Measured    Total: 10803

Unique: 3413 ( $R_{\text{int}} = 0.030$ )

Friedel pairs: 1489

Corrections    Lorentz-polarization

Absorption

(trans. factors: 0.781 - 0.892)

### *c. Structure Solution and Refinement*

Structure Solution    Direct Methods (SHELX97)

Refinement    Full-matrix least-squares on  $F^2$

Function Minimized     $\Sigma w (F_o^2 - F_c^2)^2$

Least Squares Weights     $w = 1 / [ \sigma^2(F_o^2) + (0.0399 \cdot P)^2 + 0.0984 \cdot P ]$

where  $P = (\text{Max}(F_o^2, 0) + 2F_c^2) / 3$

$2\theta_{\text{max}}$  cutoff    136.5°

Anomalous Dispersion    All non-hydrogen atoms

No. Observations (All reflections)    3413

No. Variables    298

Reflection/Parameter Ratio    11.45

Residuals: R1 ( $I > 2.00\sigma(I)$ )    0.0305

Residuals: R (All reflections)    0.0323

Residuals: wR2 (All reflections)    0.0770

Goodness of Fit Indicator    1.080

Flack Parameter    0.24(17)

Max Shift/Error in Final Cycle    0.001

Maximum peak in Final Diff. Map     $0.18 \text{ e}^-/\text{\AA}^3$

Minimum peak in Final Diff. Map     $-0.16 \text{ e}^-/\text{\AA}^3$



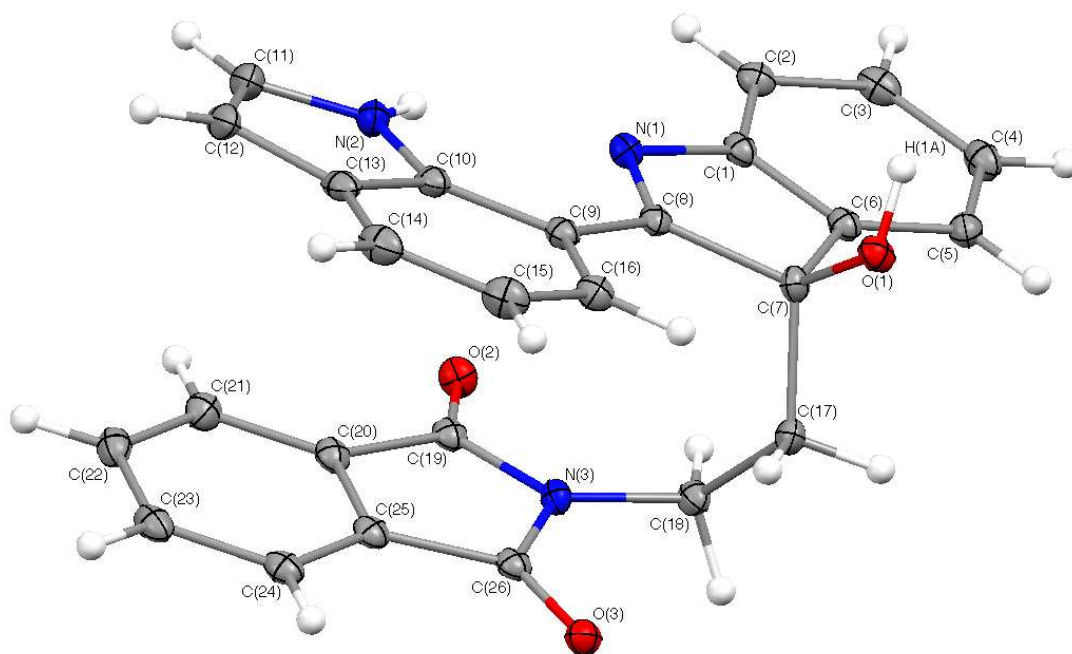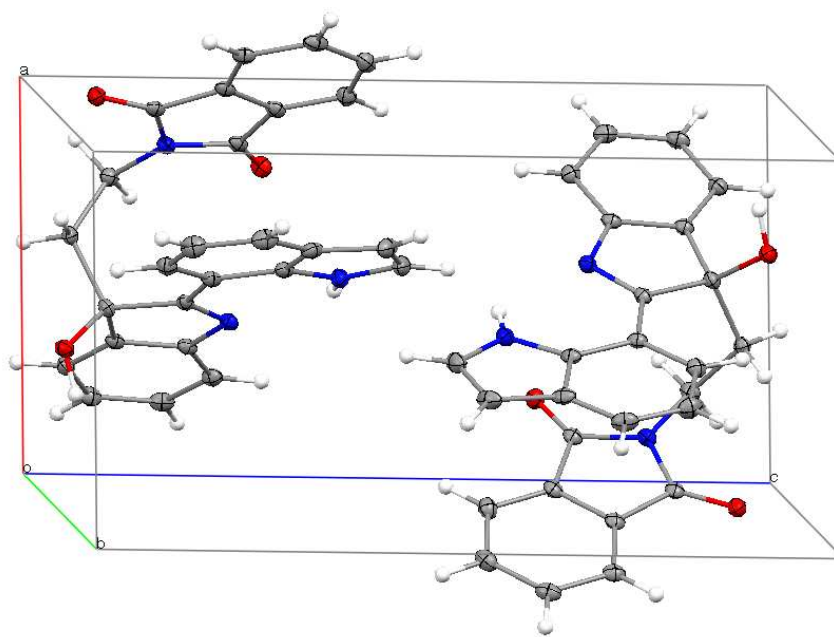

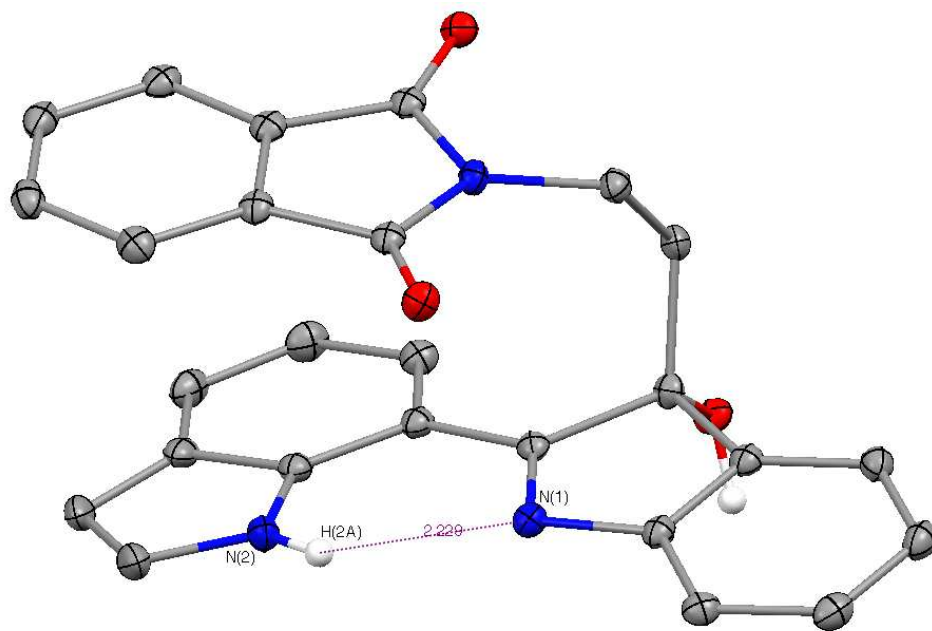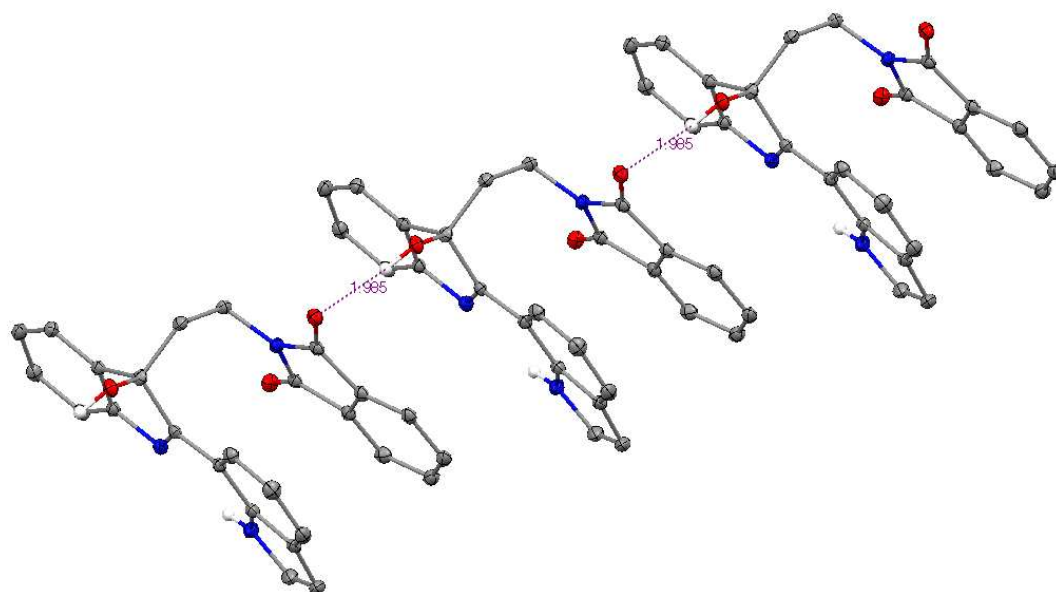

*Packing diagram along the crystallographic a-axis*

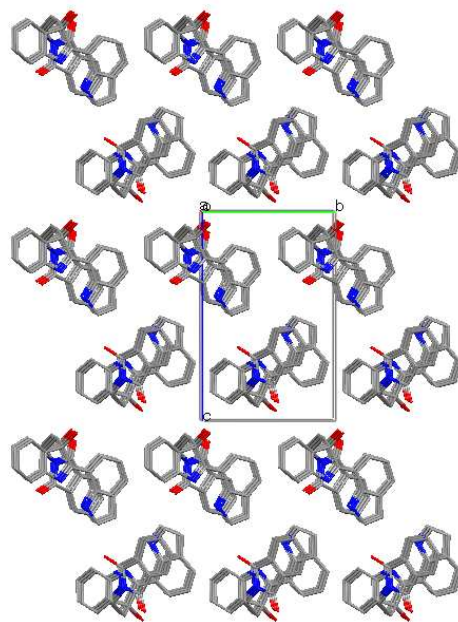

*Packing diagram along the crystallographic b-axis*

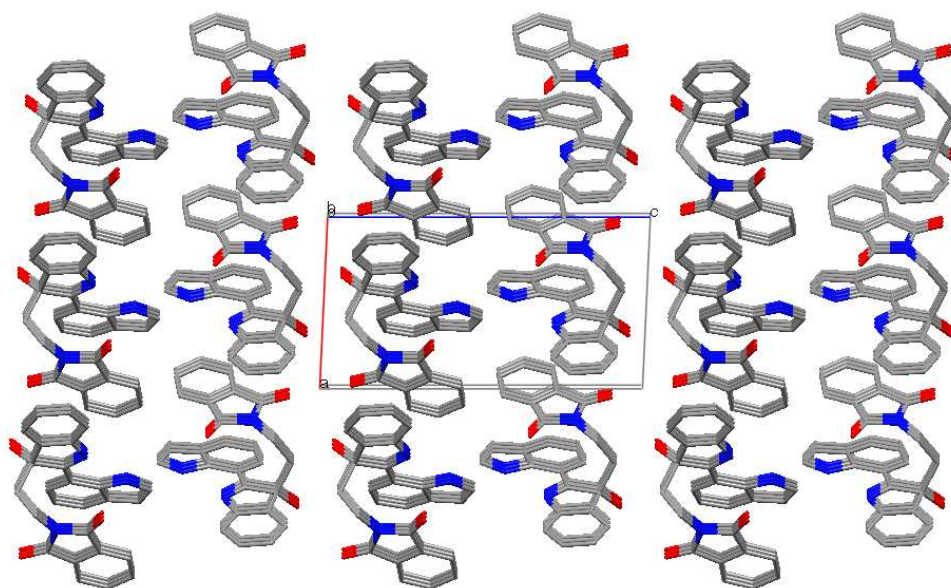

*Packing diagram along the crystallographic c-axis*

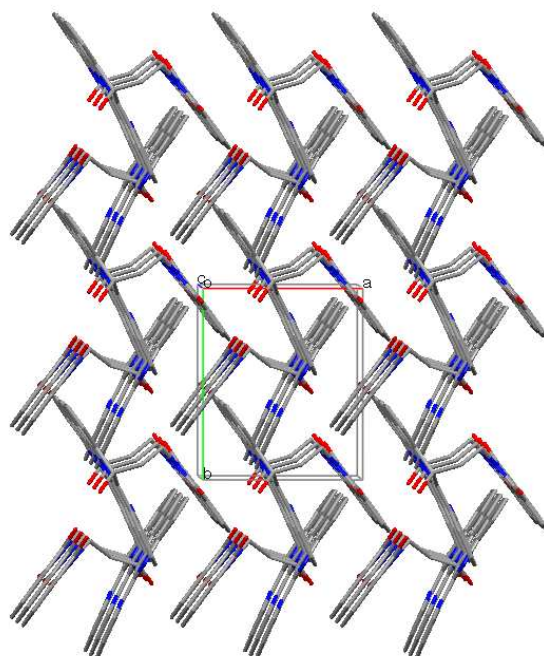

**Table S3.** Atomic coordinates and  $B_{\text{iso}}/B_{\text{eq}}$

| atom | x           | y           | z           | $B_{\text{eq}}$ |
|------|-------------|-------------|-------------|-----------------|
| O(1) | 0.67725(16) | 0.54037(14) | 0.94714(8)  | 1.86(2)         |
| O(2) | 0.25987(16) | 0.29457(13) | 0.65759(8)  | 1.94(2)         |
| O(3) | 0.04021(15) | 0.54743(14) | 0.90183(8)  | 1.90(2)         |
| N(1) | 0.62529(17) | 0.43015(15) | 0.71619(9)  | 1.55(2)         |
| N(2) | 0.4759(2)   | 0.62345(18) | 0.58607(10) | 1.88(2)         |
| N(3) | 0.18701(17) | 0.40790(16) | 0.79575(10) | 1.53(2)         |
| C(1) | 0.7121(2)   | 0.30881(19) | 0.76023(12) | 1.58(2)         |
| C(2) | 0.8079(2)   | 0.20117(19) | 0.71699(13) | 1.79(3)         |
| C(3) | 0.8908(2)   | 0.0963(2)   | 0.77401(13) | 2.03(3)         |
| C(4) | 0.8788(2)   | 0.0985(2)   | 0.87045(13) | 2.14(3)         |

**Table S3.** Atomic coordinates and  $B_{\text{iso}}/B_{\text{eq}}$  (continued)

|      |           |             |             |         |
|------|-----------|-------------|-------------|---------|
| C(5) | 0.7831(2) | 0.2073(2)   | 0.91289(12) | 1.83(3) |
| C(6) | 0.6999(2) | 0.31174(19) | 0.85742(12) | 1.56(2) |
| C(7) | 0.5913(2) | 0.44398(19) | 0.88092(11) | 1.56(3) |

|       |            |             |             |         |
|-------|------------|-------------|-------------|---------|
| C(8)  | 0.5630(2)  | 0.51060(18) | 0.78191(11) | 1.45(2) |
| C(9)  | 0.4767(2)  | 0.64975(19) | 0.76040(12) | 1.60(3) |
| C(10) | 0.4430(2)  | 0.6947(2)   | 0.66736(12) | 1.66(3) |
| C(11) | 0.4259(2)  | 0.7110(2)   | 0.51166(13) | 2.44(3) |
| C(12) | 0.3579(2)  | 0.8380(2)   | 0.54324(14) | 2.44(3) |
| C(13) | 0.3679(2)  | 0.8319(2)   | 0.64334(13) | 2.01(3) |
| C(14) | 0.3238(2)  | 0.9278(2)   | 0.71549(14) | 2.32(3) |
| C(15) | 0.3525(2)  | 0.8845(2)   | 0.80680(14) | 2.33(3) |
| C(16) | 0.4273(2)  | 0.7480(2)   | 0.82939(13) | 1.85(3) |
| C(17) | 0.4182(2)  | 0.4009(2)   | 0.92477(11) | 1.65(2) |
| C(18) | 0.2862(2)  | 0.3148(2)   | 0.86318(12) | 1.74(3) |
| C(19) | 0.1846(2)  | 0.39121(19) | 0.69811(12) | 1.59(2) |
| C(20) | 0.0738(2)  | 0.51268(19) | 0.65939(12) | 1.68(3) |
| C(21) | 0.0312(2)  | 0.5514(2)   | 0.56793(12) | 1.99(3) |
| C(22) | -0.0771(2) | 0.6728(2)   | 0.55342(14) | 2.12(3) |
| C(23) | -0.1394(2) | 0.7516(2)   | 0.62804(13) | 2.13(3) |
| C(24) | -0.0972(2) | 0.71174(19) | 0.72008(13) | 1.85(3) |
| C(25) | 0.0099(2)  | 0.59064(19) | 0.73377(12) | 1.66(3) |
| C(26) | 0.0760(2)  | 0.51973(19) | 0.82132(12) | 1.61(3) |

$$B_{\text{eq}} = 8/3 \pi^2 (U_{11}(\text{aa}^*)^2 + U_{22}(\text{bb}^*)^2 + U_{33}(\text{cc}^*)^2 + 2U_{12}(\text{aa}^*\text{bb}^*)\cos \gamma + 2U_{13}(\text{aa}^*\text{cc}^*)\cos \beta + 2U_{23}(\text{bb}^*\text{cc}^*)\cos \alpha)$$

**Table S4.** Atomic coordinates and  $B_{\text{iso}}$  involving hydrogens/ $B_{\text{eq}}$

| atom  | x      | y      | z      | $B_{\text{eq}}$ |
|-------|--------|--------|--------|-----------------|
| H(1)  | 0.8166 | 0.1992 | 0.6511 | 2.15            |
| H(2)  | 0.9573 | 0.0212 | 0.7463 | 2.43            |
| H(3)  | 0.9364 | 0.0252 | 0.9076 | 2.57            |
| H(4)  | 0.7752 | 0.2097 | 0.9789 | 2.20            |
| H(5)  | 0.4372 | 0.6865 | 0.4478 | 2.93            |
| H(6)  | 0.3121 | 0.9165 | 0.5060 | 2.93            |
| H(7)  | 0.2748 | 1.0212 | 0.7013 | 2.79            |
| H(8)  | 0.3211 | 0.9484 | 0.8556 | 2.80            |
| H(9)  | 0.4448 | 0.7215 | 0.8933 | 2.21            |
| H(10) | 0.4471 | 0.3420 | 0.9814 | 1.98            |

|       |          |          |            |        |
|-------|----------|----------|------------|--------|
| H(11) | 0.3602   | 0.4916   | 0.9453     | 1.98   |
| H(12) | 0.3494   | 0.2387   | 0.8287     | 2.09   |
| H(13) | 0.2029   | 0.2646   | 0.9034     | 2.09   |
| H(14) | 0.0741   | 0.4974   | 0.5170     | 2.39   |
| H(15) | -0.1091  | 0.7023   | 0.4913     | 2.55   |
| H(16) | -0.2124  | 0.8345   | 0.6159     | 2.55   |
| H(17) | -0.1400  | 0.7652   | 0.7712     | 2.22   |
| H(1A) | 0.790(2) | 0.552(2) | 0.9342(13) | 2.8(4) |
| H(2A) | 0.522(2) | 0.539(2) | 0.5857(13) | 2.6(4) |

$$B_{\text{eq}} = 8/3 \pi^2 (U_{11}(\text{aa}^*)^2 + U_{22}(\text{bb}^*)^2 + U_{33}(\text{cc}^*)^2 + 2U_{12}(\text{aa}^*\text{bb}^*)\cos \gamma + 2U_{13}(\text{aa}^*\text{cc}^*)\cos \beta + 2U_{23}(\text{bb}^*\text{cc}^*)\cos \alpha)$$

**Table S5.** Anisotropic displacement parameters

| atom  | U <sub>11</sub> | U <sub>22</sub> | U <sub>33</sub> | U <sub>12</sub> | U <sub>13</sub> | U <sub>23</sub> |            |            |
|-------|-----------------|-----------------|-----------------|-----------------|-----------------|-----------------|------------|------------|
| O(1)  | 0.0206(6)       |                 | 0.0266(6)       |                 | 0.0232(6)       | -0.0019(5)      | -0.0013(5) | -0.0055(5) |
| O(2)  | 0.0265(6)       |                 | 0.0209(6)       |                 | 0.0260(6)       | 0.0019(5)       | -0.0004(5) | -0.0042(5) |
| O(3)  | 0.0222(6)       |                 | 0.0283(6)       |                 | 0.0218(6)       | -0.0020(5)      | 0.0008(5)  | -0.0030(5) |
| N(1)  | 0.0193(7)       |                 | 0.0180(7)       |                 | 0.0215(7)       | 0.0001(6)       | -0.0008(5) | -0.0021(6) |
| N(2)  | 0.0239(8)       |                 | 0.0271(9)       |                 | 0.0203(7)       | 0.0034(6)       | 0.0001(6)  | 0.0029(6)  |
| N(3)  | 0.0197(7)       |                 | 0.0168(7)       |                 | 0.0214(7)       | -0.0005(6)      | -0.0026(5) | 0.0007(6)  |
| C(1)  | 0.0168(8)       |                 | 0.0173(8)       |                 | 0.0257(9)       | -0.0016(6)      | -0.0019(7) | 0.0009(7)  |
| C(2)  | 0.0217(8)       |                 | 0.0202(9)       |                 | 0.0261(9)       | -0.0029(7)      | 0.0009(7)  | -0.0033(7) |
| C(3)  | 0.0210(8)       |                 | 0.0177(9)       |                 | 0.0383(10)      | -0.0002(7)      | 0.0008(7)  | -0.0037(8) |
| C(4)  | 0.0229(9)       |                 | 0.0213(9)       |                 | 0.0369(10)      | 0.0015(7)       | -0.0031(7) | 0.0052(8)  |
| C(5)  | 0.0216(8)       |                 | 0.0245(9)       |                 | 0.0233(9)       | -0.0018(7)      | -0.0015(7) | 0.0034(8)  |
| C(6)  | 0.0172(8)       |                 | 0.0179(8)       |                 | 0.0240(8)       | -0.0024(6)      | -0.0011(6) | 0.0001(7)  |
| C(7)  | 0.0208(8)       |                 | 0.0209(9)       |                 | 0.0175(8)       | -0.0004(7)      | -0.0028(6) | -0.0016(7) |
| C(8)  | 0.0159(8)       |                 | 0.0185(8)       |                 | 0.0205(8)       | -0.0039(6)      | -0.0016(6) | 0.0006(7)  |
| C(9)  | 0.0163(8)       |                 | 0.0189(8)       |                 | 0.0255(9)       | -0.0017(6)      | 0.0006(7)  | 0.0011(7)  |
| C(10) | 0.0161(8)       |                 | 0.0214(9)       |                 | 0.0257(9)       | -0.0022(7)      | 0.0020(6)  | 0.0027(8)  |
| C(11) | 0.0245(9)       |                 | 0.0434(12)      |                 | 0.0249(9)       | 0.0010(8)       | 0.0007(7)  | 0.0114(9)  |
| C(12) | 0.0229(9)       |                 | 0.0345(11)      |                 | 0.0355(10)      | 0.0026(8)       | 0.0021(8)  | 0.0187(9)  |
| C(13) | 0.0174(8)       |                 | 0.0240(10)      |                 | 0.0353(10)      | -0.0010(7)      | 0.0054(7)  | 0.0090(8)  |
| C(14) | 0.0245(9)       |                 | 0.0176(9)       |                 | 0.0463(11)      | 0.0028(7)       | 0.0032(8)  | 0.0048(8)  |

|       |            |            |            |            |            |            |
|-------|------------|------------|------------|------------|------------|------------|
| C(15) | 0.0295(10) | 0.0200(9)  | 0.0393(11) | 0.0021(7)  | 0.0046(8)  | -0.0049(8) |
| C(16) | 0.0230(8)  | 0.0210(9)  | 0.0260(9)  | -0.0024(7) | 0.0000(7)  | -0.0029(8) |
| C(17) | 0.0222(8)  | 0.0221(8)  | 0.0181(8)  | 0.0013(7)  | -0.0005(6) | 0.0037(7)  |
| C(18) | 0.0213(8)  | 0.0199(9)  | 0.0246(8)  | -0.0008(7) | -0.0010(7) | 0.0041(7)  |
| C(19) | 0.0178(8)  | 0.0180(9)  | 0.0242(8)  | -0.0046(7) | -0.0016(6) | -0.0001(7) |
| C(20) | 0.0193(8)  | 0.0192(9)  | 0.0250(9)  | -0.0049(6) | -0.0034(7) | -0.0004(7) |
| C(21) | 0.0270(9)  | 0.0247(9)  | 0.0238(9)  | -0.0054(8) | -0.0015(7) | -0.0018(7) |
| C(22) | 0.0271(9)  | 0.0240(10) | 0.0288(9)  | -0.0052(7) | -0.0058(7) | 0.0065(8)  |
| C(23) | 0.0201(8)  | 0.0202(9)  | 0.0401(11) | -0.0027(7) | -0.0034(8) | 0.0069(8)  |
| C(24) | 0.0191(8)  | 0.0184(9)  | 0.0328(10) | -0.0037(7) | 0.0004(7)  | -0.0013(8) |
| C(25) | 0.0176(8)  | 0.0196(9)  | 0.0258(8)  | -0.0055(6) | -0.0014(7) | -0.0018(7) |
| C(26) | 0.0169(8)  | 0.0196(9)  | 0.0246(9)  | -0.0053(6) | -0.0004(7) | -0.0007(7) |

The general temperature factor expression:  $\exp(-2\pi^2(a^{*2}U_{11}h^2 + b^{*2}U_{22}k^2 + c^{*2}U_{33}l^2 + 2a^*b^*U_{12}hk + 2a^*c^*U_{13}hl + 2b^*c^*U_{23}kl))$

**Table S6.** Bond lengths (Å)

| atom  | atom  | distance | atom  | atom  | distance |
|-------|-------|----------|-------|-------|----------|
| O(1)  | C(7)  | 1.431(2) | O(2)  | C(19) | 1.215(2) |
| O(3)  | C(26) | 1.224(2) | N(1)  | C(1)  | 1.423(2) |
| N(1)  | C(8)  | 1.301(2) | N(2)  | C(10) | 1.367(2) |
| N(2)  | C(11) | 1.372(2) | N(3)  | C(18) | 1.470(2) |
| N(3)  | C(19) | 1.406(2) | N(3)  | C(26) | 1.386(2) |
| C(1)  | C(2)  | 1.387(2) | C(1)  | C(6)  | 1.400(2) |
| C(2)  | C(3)  | 1.392(2) | C(3)  | C(4)  | 1.389(2) |
| C(4)  | C(5)  | 1.389(2) | C(5)  | C(6)  | 1.377(2) |
| C(6)  | C(7)  | 1.511(2) | C(7)  | C(8)  | 1.549(2) |
| C(7)  | C(17) | 1.539(2) | C(8)  | C(9)  | 1.457(2) |
| C(9)  | C(10) | 1.407(2) | C(9)  | C(16) | 1.399(2) |
| C(10) | C(13) | 1.414(2) | C(11) | C(12) | 1.356(2) |
| C(12) | C(13) | 1.433(2) | C(13) | C(14) | 1.407(2) |
| C(14) | C(15) | 1.374(2) | C(15) | C(16) | 1.402(2) |
| C(17) | C(18) | 1.526(2) | C(19) | C(20) | 1.486(2) |
| C(20) | C(21) | 1.381(2) | C(20) | C(25) | 1.388(2) |
| C(21) | C(22) | 1.393(2) | C(22) | C(23) | 1.390(2) |
| C(23) | C(24) | 1.391(2) | C(24) | C(25) | 1.384(2) |

C(25) C(26) 1.479(2)

**Table S7.** Bond lengths involving hydrogens (Å)

| atom  | atom  | distance | atom  | atom  | distance |
|-------|-------|----------|-------|-------|----------|
| O(1)  | H(1A) | 0.89(2)  | N(2)  | H(2A) | 0.85(2)  |
| C(2)  | H(1)  | 0.950    | C(3)  | H(2)  | 0.950    |
| C(4)  | H(3)  | 0.950    | C(5)  | H(4)  | 0.950    |
| C(11) | H(5)  | 0.950    | C(12) | H(6)  | 0.950    |
| C(14) | H(7)  | 0.950    | C(15) | H(8)  | 0.950    |
| C(16) | H(9)  | 0.950    | C(17) | H(10) | 0.990    |
| C(17) | H(11) | 0.990    | C(18) | H(12) | 0.990    |
| C(18) | H(13) | 0.990    | C(21) | H(14) | 0.950    |
| C(22) | H(15) | 0.950    | C(23) | H(16) | 0.950    |
| C(24) | H(17) | 0.950    |       |       |          |

**Table S8.** Bond angles (°)

| atom  | atom  | atom  | angle      | atom  | atom  | atom  | angle      |
|-------|-------|-------|------------|-------|-------|-------|------------|
| C(1)  | N(1)  | C(8)  | 107.27(13) | C(10) | N(2)  | C(11) | 109.20(15) |
| C(18) | N(3)  | C(19) | 125.01(14) | C(18) | N(3)  | C(26) | 123.67(14) |
| C(19) | N(3)  | C(26) | 111.24(13) | N(1)  | C(1)  | C(2)  | 126.69(15) |
| N(1)  | C(1)  | C(6)  | 112.03(14) | C(2)  | C(1)  | C(6)  | 121.19(15) |
| C(1)  | C(2)  | C(3)  | 117.39(16) | C(2)  | C(3)  | C(4)  | 121.64(16) |
| C(3)  | C(4)  | C(5)  | 120.38(16) | C(4)  | C(5)  | C(6)  | 118.69(16) |
| C(1)  | C(6)  | C(5)  | 120.71(15) | C(1)  | C(6)  | C(7)  | 107.40(14) |
| C(5)  | C(6)  | C(7)  | 131.87(15) | O(1)  | C(7)  | C(6)  | 113.60(13) |
| O(1)  | C(7)  | C(8)  | 113.94(13) | O(1)  | C(7)  | C(17) | 105.19(12) |
| C(6)  | C(7)  | C(8)  | 99.48(12)  | C(6)  | C(7)  | C(17) | 112.08(14) |
| C(8)  | C(7)  | C(17) | 112.81(13) | N(1)  | C(8)  | C(7)  | 113.60(13) |
| N(1)  | C(8)  | C(9)  | 121.04(14) | C(7)  | C(8)  | C(9)  | 125.35(14) |
| C(8)  | C(9)  | C(10) | 121.04(15) | C(8)  | C(9)  | C(16) | 122.92(15) |
| C(10) | C(9)  | C(16) | 116.01(15) | N(2)  | C(10) | C(9)  | 129.45(16) |
| N(2)  | C(10) | C(13) | 107.61(15) | C(9)  | C(10) | C(13) | 122.92(16) |
| N(2)  | C(11) | C(12) | 109.64(16) | C(11) | C(12) | C(13) | 107.24(17) |



|       |       |       |            |       |       |       |            |
|-------|-------|-------|------------|-------|-------|-------|------------|
| C(10) | C(13) | C(12) | 106.30(16) | C(10) | C(13) | C(14) | 118.73(16) |
| C(12) | C(13) | C(14) | 134.97(17) | C(13) | C(14) | C(15) | 119.15(17) |
| C(14) | C(15) | C(16) | 121.36(18) | C(9)  | C(16) | C(15) | 121.79(17) |
| C(7)  | C(17) | C(18) | 116.84(13) | N(3)  | C(18) | C(17) | 112.82(14) |
| O(2)  | C(19) | N(3)  | 124.67(15) | O(2)  | C(19) | C(20) | 129.57(15) |
| N(3)  | C(19) | C(20) | 105.76(14) | C(19) | C(20) | C(21) | 130.52(16) |
| C(19) | C(20) | C(25) | 108.05(14) | C(21) | C(20) | C(25) | 121.43(16) |
| C(20) | C(21) | C(22) | 117.20(16) | C(21) | C(22) | C(23) | 121.26(17) |
| C(22) | C(23) | C(24) | 121.36(17) | C(23) | C(24) | C(25) | 116.94(16) |
| C(20) | C(25) | C(24) | 121.79(16) | C(20) | C(25) | C(26) | 107.96(14) |
| C(24) | C(25) | C(26) | 130.24(16) | O(3)  | C(26) | N(3)  | 124.51(15) |
| O(3)  | C(26) | C(25) | 128.79(15) | N(3)  | C(26) | C(25) | 106.67(14) |

**Table S9.** Bond angles involving hydrogens (°)

| atom  | atom  | atom  | angle     | atom  | atom  | atom  | angle     |
|-------|-------|-------|-----------|-------|-------|-------|-----------|
| C(7)  | O(1)  | H(1A) | 110.4(13) | C(10) | N(2)  | H(2A) | 122.0(13) |
| C(11) | N(2)  | H(2A) | 128.8(13) | C(1)  | C(2)  | H(1)  | 121.3     |
| C(3)  | C(2)  | H(1)  | 121.3     | C(2)  | C(3)  | H(2)  | 119.2     |
| C(4)  | C(3)  | H(2)  | 119.2     | C(3)  | C(4)  | H(3)  | 119.8     |
| C(5)  | C(4)  | H(3)  | 119.8     | C(4)  | C(5)  | H(4)  | 120.7     |
| C(6)  | C(5)  | H(4)  | 120.7     | N(2)  | C(11) | H(5)  | 125.2     |
| C(12) | C(11) | H(5)  | 125.2     | C(11) | C(12) | H(6)  | 126.4     |
| C(13) | C(12) | H(6)  | 126.4     | C(13) | C(14) | H(7)  | 120.4     |
| C(15) | C(14) | H(7)  | 120.4     | C(14) | C(15) | H(8)  | 119.3     |
| C(16) | C(15) | H(8)  | 119.3     | C(9)  | C(16) | H(9)  | 119.1     |
| C(15) | C(16) | H(9)  | 119.1     | C(7)  | C(17) | H(10) | 108.1     |
| C(7)  | C(17) | H(11) | 108.1     | C(18) | C(17) | H(10) | 108.1     |
| C(18) | C(17) | H(11) | 108.1     | H(10) | C(17) | H(11) | 107.3     |
| N(3)  | C(18) | H(12) | 109.0     | N(3)  | C(18) | H(13) | 109.0     |
| C(17) | C(18) | H(12) | 109.0     | C(17) | C(18) | H(13) | 109.0     |
| H(12) | C(18) | H(13) | 107.8     | C(20) | C(21) | H(14) | 121.4     |
| C(22) | C(21) | H(14) | 121.4     | C(21) | C(22) | H(15) | 119.4     |
| C(23) | C(22) | H(15) | 119.4     | C(22) | C(23) | H(16) | 119.3     |

|       |       |       |       |       |       |       |       |
|-------|-------|-------|-------|-------|-------|-------|-------|
| C(24) | C(23) | H(16) | 119.3 | C(23) | C(24) | H(17) | 121.5 |
| C(25) | C(24) | H(17) | 121.5 |       |       |       |       |

**Table S10.** Torsion Angles(°)

| atom1 | atom2 | atom3 | atom4 | angle       | atom1 | atom2 | atom3 | atom4 | angle       |
|-------|-------|-------|-------|-------------|-------|-------|-------|-------|-------------|
| C(1)  | N(1)  | C(8)  | C(7)  | -4.10(18)   | C(1)  | N(1)  | C(8)  | C(9)  | 175.61(14)  |
| C(8)  | N(1)  | C(1)  | C(2)  | -175.08(16) | C(8)  | N(1)  | C(1)  | C(6)  | 1.49(18)    |
| C(10) | N(2)  | C(11) | C(12) | -1.0(2)     | C(11) | N(2)  | C(10) | C(9)  | -178.15(17) |
| C(11) | N(2)  | C(10) | C(13) | 0.58(19)    | C(18) | N(3)  | C(19) | O(2)  | 2.5(2)      |
| C(18) | N(3)  | C(19) | C(20) | -177.70(14) | C(19) | N(3)  | C(18) | C(17) | 120.80(16)  |
| C(18) | N(3)  | C(26) | O(3)  | -4.6(2)     | C(18) | N(3)  | C(26) | C(25) | 177.11(14)  |
| C(26) | N(3)  | C(18) | C(17) | -62.6(2)    | C(19) | N(3)  | C(26) | O(3)  | 172.35(15)  |
| C(19) | N(3)  | C(26) | C(25) | -5.91(18)   | C(26) | N(3)  | C(19) | O(2)  | -174.42(16) |
| C(26) | N(3)  | C(19) | C(20) | 5.37(18)    | N(1)  | C(1)  | C(2)  | C(3)  | 176.47(15)  |
| N(1)  | C(1)  | C(6)  | C(5)  | -176.80(14) | N(1)  | C(1)  | C(6)  | C(7)  | 1.69(18)    |
| C(2)  | C(1)  | C(6)  | C(5)  | -0.0(2)     | C(2)  | C(1)  | C(6)  | C(7)  | 178.48(15)  |
| C(6)  | C(1)  | C(2)  | C(3)  | 0.2(2)      | C(1)  | C(2)  | C(3)  | C(4)  | -0.04(19)   |
| C(2)  | C(3)  | C(4)  | C(5)  | -0.3(2)     | C(3)  | C(4)  | C(5)  | C(6)  | 0.4(2)      |
| C(4)  | C(5)  | C(6)  | C(1)  | -0.3(2)     | C(4)  | C(5)  | C(6)  | C(7)  | -178.36(17) |
| C(1)  | C(6)  | C(7)  | O(1)  | -125.05(14) | C(1)  | C(6)  | C(7)  | C(8)  | -3.59(16)   |
| C(1)  | C(6)  | C(7)  | C(17) | 115.88(14)  | C(5)  | C(6)  | C(7)  | O(1)  | 53.2(2)     |
| C(5)  | C(6)  | C(7)  | C(8)  | 174.67(17)  | C(5)  | C(6)  | C(7)  | C(17) | -65.9(2)    |
| O(1)  | C(7)  | C(8)  | N(1)  | 126.09(15)  | O(1)  | C(7)  | C(8)  | C(9)  | -53.6(2)    |
| O(1)  | C(7)  | C(17) | C(18) | 171.62(13)  | C(6)  | C(7)  | C(8)  | N(1)  | 4.87(17)    |
| C(6)  | C(7)  | C(8)  | C(9)  | -174.81(15) | C(6)  | C(7)  | C(17) | C(18) | -64.47(18)  |
| C(8)  | C(7)  | C(17) | C(18) | 46.8(2)     | C(17) | C(7)  | C(8)  | N(1)  | -114.05(16) |
| C(17) | C(7)  | C(8)  | C(9)  | 66.3(2)     | N(1)  | C(8)  | C(9)  | C(10) | 6.2(2)      |
| N(1)  | C(8)  | C(9)  | C(16) | -171.88(15) | C(7)  | C(8)  | C(9)  | C(10) | -174.14(15) |
| C(7)  | C(8)  | C(9)  | C(16) | 7.8(2)      | C(8)  | C(9)  | C(10) | N(2)  | 1.9(2)      |
| C(8)  | C(9)  | C(10) | C(13) | -176.68(15) | C(8)  | C(9)  | C(16) | C(15) | 176.69(16)  |
| C(10) | C(9)  | C(16) | C(15) | -1.5(2)     | C(16) | C(9)  | C(10) | N(2)  | -179.92(16) |
| C(16) | C(9)  | C(10) | C(13) | 1.5(2)      | N(2)  | C(10) | C(13) | C(12) | 0.03(14)    |
| N(2)  | C(10) | C(13) | C(14) | -179.16(15) | C(9)  | C(10) | C(13) | C(12) | 178.86(15)  |

|       |       |       |       |            |       |       |       |       |             |
|-------|-------|-------|-------|------------|-------|-------|-------|-------|-------------|
| C(9)  | C(10) | C(13) | C(14) | -0.3(2)    | N(2)  | C(11) | C(12) | C(13) | 1.0(2)      |
| C(11) | C(12) | C(13) | C(10) | -0.63(19)  | C(11) | C(12) | C(13) | C(14) | 178.36(19)  |
| C(10) | C(13) | C(14) | C(15) | -1.0(2)    | C(12) | C(13) | C(14) | C(15) | -179.87(19) |
| C(13) | C(14) | C(15) | C(16) | 1.0(2)     | C(14) | C(15) | C(16) | C(9)  | 0.2(2)      |
| C(7)  | C(17) | C(18) | N(3)  | -78.36(18) | O(2)  | C(19) | C(20) | C(21) | -2.4(3)     |
| O(2)  | C(19) | C(20) | C(25) | 177.15(17) | N(3)  | C(19) | C(20) | C(21) | 177.87(17)  |
| N(3)  | C(19) | C(20) | C(25) | -2.63(18)  | C(19) | C(20) | C(21) | C(22) | -179.95(13) |
| C(19) | C(20) | C(25) | C(24) | 179.56(15) | C(19) | C(20) | C(25) | C(26) | -0.84(18)   |
| C(21) | C(20) | C(25) | C(24) | -0.9(2)    | C(21) | C(20) | C(25) | C(26) | 178.72(15)  |

**Table S11.** Torsion angles (°) (continued)

| atom1 | atom2 | atom3 | atom4 | angle       | atom1 | atom2 | atom3 | atom4 | angle       |
|-------|-------|-------|-------|-------------|-------|-------|-------|-------|-------------|
| C(25) | C(20) | C(21) | C(22) | 0.6(2)      | C(20) | C(21) | C(22) | C(23) | 0.1(2)      |
| C(21) | C(22) | C(23) | C(24) | -0.5(2)     | C(22) | C(23) | C(24) | C(25) | 0.2(2)      |
| C(23) | C(24) | C(25) | C(20) | 0.4(2)      | C(23) | C(24) | C(25) | C(26) | -179.07(17) |
| C(20) | C(25) | C(26) | O(3)  | -174.09(17) | C(20) | C(25) | C(26) | N(3)  | 4.07(18)    |
| C(24) | C(25) | C(26) | O(3)  | 5.5(3)      | C(24) | C(25) | C(26) | N(3)  | -176.38(17) |

The sign is positive if when looking from atom 2 to atom 3 a clock-wise motion of atom 1 would superimpose it on atom 4.

**Table S12.** Distances beyond the asymmetric unit out to 3.60 Å

| atom | atom                | distance   | atom | atom                | distance   |
|------|---------------------|------------|------|---------------------|------------|
| O(1) | O(3) <sup>1)</sup>  | 2.8727(16) | O(1) | N(1)                | 3.4629(17) |
| O(1) | C(1)                | 3.431(2)   | O(1) | C(5)                | 3.190(2)   |
| O(1) | C(6)                | 2.462(2)   | O(1) | C(8)                | 2.4988(19) |
| O(1) | C(9)                | 3.180(2)   | O(1) | C(16)               | 3.127(2)   |
| O(1) | C(17)               | 2.360(2)   | O(2) | N(1)                | 3.1286(17) |
| O(2) | N(2)                | 3.597(2)   | O(2) | N(3)                | 2.3230(18) |
| O(2) | C(8)                | 3.4681(19) | O(2) | C(11) <sup>2)</sup> | 3.569(2)   |
| O(2) | C(14) <sup>3)</sup> | 3.479(2)   | O(2) | C(18)               | 2.948(2)   |
| O(2) | C(20)               | 2.446(2)   | O(2) | C(21)               | 3.159(2)   |
| O(2) | C(22) <sup>4)</sup> | 3.453(2)   | O(2) | C(25)               | 3.510(2)   |
| O(2) | C(26)               | 3.463(2)   | O(3) | O(1) <sup>5)</sup>  | 2.8727(16) |

|      |                     |            |      |                     |            |
|------|---------------------|------------|------|---------------------|------------|
| O(3) | N(3)                | 2.3111(18) | O(3) | C(4) <sup>6)</sup>  | 3.324(2)   |
| O(3) | C(5) <sup>6)</sup>  | 3.265(2)   | O(3) | C(6) <sup>5)</sup>  | 3.409(2)   |
| O(3) | C(7) <sup>5)</sup>  | 3.551(2)   | O(3) | C(17)               | 3.181(2)   |
| O(3) | C(18)               | 2.904(2)   | O(3) | C(19)               | 3.472(2)   |
| O(3) | C(20)               | 3.508(2)   | O(3) | C(24)               | 3.142(2)   |
| O(3) | C(25)               | 2.440(2)   | N(1) | O(1)                | 3.4629(17) |
| N(1) | O(2)                | 3.1286(17) | N(1) | N(2)                | 2.773(2)   |
| N(1) | N(3)                | 3.5863(18) | N(1) | C(2)                | 2.512(2)   |
| N(1) | C(6)                | 2.341(2)   | N(1) | C(7)                | 2.389(2)   |
| N(1) | C(9)                | 2.402(2)   | N(1) | C(10)               | 2.858(2)   |
| N(1) | C(17)               | 3.453(2)   | N(1) | C(18)               | 3.568(2)   |
| N(1) | C(19)               | 3.378(2)   | N(1) | C(24) <sup>1)</sup> | 3.329(2)   |
| N(1) | C(25) <sup>1)</sup> | 3.278(2)   | N(2) | O(2)                | 3.597(2)   |
| N(2) | N(1)                | 2.773(2)   | N(2) | C(8)                | 3.033(2)   |
| N(2) | C(9)                | 2.508(2)   | N(2) | C(12)               | 2.231(2)   |
| N(2) | C(12) <sup>2)</sup> | 3.471(2)   | N(2) | C(13)               | 2.244(2)   |
| N(2) | C(14)               | 3.564(2)   | N(2) | C(19)               | 3.512(2)   |
| N(2) | C(20)               | 3.439(2)   | N(2) | C(21)               | 3.452(2)   |
| N(2) | C(22) <sup>1)</sup> | 3.491(2)   | N(2) | C(23) <sup>1)</sup> | 3.190(2)   |
| N(3) | O(2)                | 2.3230(18) | N(3) | O(3)                | 2.3111(18) |
| N(3) | N(1)                | 3.5863(18) | N(3) | C(2) <sup>5)</sup>  | 3.591(2)   |
| N(3) | C(7)                | 3.280(2)   | N(3) | C(8)                | 3.032(2)   |
| N(3) | C(9)                | 3.181(2)   | N(3) | C(17)               | 2.496(2)   |
| N(3) | C(20)               | 2.307(2)   | N(3) | C(25)               | 2.299(2)   |
| C(1) | O(1)                | 3.431(2)   | C(1) | C(3)                | 2.374(2)   |
| C(1) | C(4)                | 2.759(2)   | C(1) | C(5)                | 2.413(2)   |

**Table S12.** Distances beyond the asymmetric unit out to 3.60 Å (continued)

| atom | atom                | distance | atom | atom                | distance |
|------|---------------------|----------|------|---------------------|----------|
| C(1) | C(7)                | 2.347(2) | C(1) | C(8)                | 2.195(2) |
| C(1) | C(9)                | 3.594(2) | C(1) | C(17)               | 3.431(2) |
| C(1) | C(25) <sup>1)</sup> | 3.465(2) | C(1) | C(26) <sup>1)</sup> | 3.457(2) |
| C(2) | N(1)                | 2.512(2) | C(2) | N(3) <sup>1)</sup>  | 3.591(2) |

|      |                     |            |      |                     |            |
|------|---------------------|------------|------|---------------------|------------|
| C(2) | C(4)                | 2.428(2)   | C(2) | C(5)                | 2.821(2)   |
| C(2) | C(6)                | 2.428(2)   | C(2) | C(8)                | 3.535(2)   |
| C(2) | C(19) <sup>1)</sup> | 3.377(2)   | C(3) | C(1)                | 2.374(2)   |
| C(3) | C(5)                | 2.410(2)   | C(3) | C(6)                | 2.753(2)   |
| C(3) | C(24) <sup>7)</sup> | 3.597(2)   | C(4) | O(3) <sup>8)</sup>  | 3.324(2)   |
| C(4) | C(1)                | 2.759(2)   | C(4) | C(2)                | 2.428(2)   |
| C(4) | C(6)                | 2.380(2)   | C(5) | O(1)                | 3.190(2)   |
| C(5) | O(3) <sup>8)</sup>  | 3.265(2)   | C(5) | C(1)                | 2.413(2)   |
| C(5) | C(2)                | 2.821(2)   | C(5) | C(3)                | 2.410(2)   |
| C(5) | C(7)                | 2.637(2)   | C(5) | C(17)               | 3.308(2)   |
| C(6) | O(1)                | 2.462(2)   | C(6) | O(3) <sup>1)</sup>  | 3.409(2)   |
| C(6) | N(1)                | 2.341(2)   | C(6) | C(2)                | 2.428(2)   |
| C(6) | C(3)                | 2.753(2)   | C(6) | C(4)                | 2.380(2)   |
| C(6) | C(8)                | 2.335(2)   | C(6) | C(17)               | 2.530(2)   |
| C(6) | C(18)               | 3.160(2)   | C(6) | C(26) <sup>1)</sup> | 3.498(2)   |
| C(7) | O(3) <sup>1)</sup>  | 3.551(2)   | C(7) | N(1)                | 2.389(2)   |
| C(7) | N(3)                | 3.280(2)   | C(7) | C(1)                | 2.347(2)   |
| C(7) | C(5)                | 2.637(2)   | C(7) | C(9)                | 2.671(2)   |
| C(7) | C(16)               | 3.120(2)   | C(7) | C(18)               | 2.611(2)   |
| C(8) | O(1)                | 2.4988(19) | C(8) | O(2)                | 3.4681(19) |
| C(8) | N(2)                | 3.033(2)   | C(8) | N(3)                | 3.032(2)   |
| C(8) | C(1)                | 2.195(2)   | C(8) | C(2)                | 3.535(2)   |
| C(8) | C(6)                | 2.335(2)   | C(8) | C(10)               | 2.493(2)   |
| C(8) | C(16)               | 2.509(2)   | C(8) | C(17)               | 2.572(2)   |
| C(8) | C(18)               | 3.039(2)   | C(8) | C(19)               | 3.262(2)   |
| C(8) | C(24) <sup>1)</sup> | 3.329(2)   | C(8) | C(25) <sup>1)</sup> | 3.584(2)   |
| C(9) | O(1)                | 3.180(2)   | C(9) | N(1)                | 2.402(2)   |
| C(9) | N(2)                | 2.508(2)   | C(9) | N(3)                | 3.181(2)   |
| C(9) | C(1)                | 3.594(2)   | C(9) | C(7)                | 2.671(2)   |
| C(9) | C(13)               | 2.478(2)   | C(9) | C(14)               | 2.855(2)   |
| C(9) | C(15)               | 2.448(2)   | C(9) | C(17)               | 3.317(2)   |
| C(9) | C(19)               | 3.339(2)   | C(9) | C(20)               | 3.563(2)   |
| C(9) | C(24) <sup>1)</sup> | 3.374(2)   | C(9) | C(26)               | 3.428(2)   |

**Table S12.** Distances beyond the asymmetric unit out to 3.60 Å (continued)

| atom  | atom                | distance | atom  | atom                | distance |
|-------|---------------------|----------|-------|---------------------|----------|
| C(10) | N(1)                | 2.858(2) | C(10) | C(8)                | 2.493(2) |
| C(10) | C(11)               | 2.233(2) | C(10) | C(12)               | 2.278(2) |
| C(10) | C(14)               | 2.427(2) | C(10) | C(15)               | 2.756(2) |
| C(10) | C(16)               | 2.380(2) | C(10) | C(19)               | 3.441(2) |
| C(10) | C(20)               | 3.267(2) | C(10) | C(23) <sup>1)</sup> | 3.300(2) |
| C(10) | C(24) <sup>1)</sup> | 3.556(2) | C(11) | O(2) <sup>9)</sup>  | 3.569(2) |
| C(11) | C(10)               | 2.233(2) | C(11) | C(13)               | 2.247(2) |
| C(11) | C(21)               | 3.472(2) | C(12) | N(2)                | 2.231(2) |
| C(12) | N(2) <sup>9)</sup>  | 3.471(2) | C(12) | C(10)               | 2.278(2) |
| C(12) | C(14)               | 2.624(2) | C(13) | N(2)                | 2.244(2) |
| C(13) | C(9)                | 2.478(2) | C(13) | C(11)               | 2.247(2) |
| C(13) | C(15)               | 2.398(2) | C(13) | C(16)               | 2.790(2) |
| C(14) | O(2) <sup>10)</sup> | 3.479(2) | C(14) | N(2)                | 3.564(2) |
| C(14) | C(9)                | 2.855(2) | C(14) | C(10)               | 2.427(2) |
| C(14) | C(12)               | 2.624(2) | C(14) | C(16)               | 2.421(2) |
| C(15) | C(9)                | 2.448(2) | C(15) | C(10)               | 2.756(2) |
| C(15) | C(13)               | 2.398(2) | C(16) | O(1)                | 3.127(2) |
| C(16) | C(7)                | 3.120(2) | C(16) | C(8)                | 2.509(2) |
| C(16) | C(10)               | 2.380(2) | C(16) | C(13)               | 2.790(2) |
| C(16) | C(14)               | 2.421(2) | C(16) | C(17)               | 3.453(2) |
| C(16) | C(26)               | 3.392(2) | C(17) | O(1)                | 2.360(2) |
| C(17) | O(3)                | 3.181(2) | C(17) | N(1)                | 3.453(2) |
| C(17) | N(3)                | 2.496(2) | C(17) | C(1)                | 3.431(2) |
| C(17) | C(5)                | 3.308(2) | C(17) | C(6)                | 2.530(2) |
| C(17) | C(8)                | 2.572(2) | C(17) | C(9)                | 3.317(2) |
| C(17) | C(16)               | 3.453(2) | C(17) | C(26)               | 3.135(2) |
| C(18) | O(2)                | 2.948(2) | C(18) | O(3)                | 2.904(2) |
| C(18) | N(1)                | 3.568(2) | C(18) | C(6)                | 3.160(2) |
| C(18) | C(7)                | 2.611(2) | C(18) | C(8)                | 3.039(2) |
| C(18) | C(19)               | 2.551(2) | C(18) | C(26)               | 2.518(2) |
| C(19) | O(3)                | 3.472(2) | C(19) | N(1)                | 3.378(2) |

|       |       |          |       |                    |          |
|-------|-------|----------|-------|--------------------|----------|
| C(19) | N(2)  | 3.512(2) | C(19) | C(2) <sup>5)</sup> | 3.377(2) |
| C(19) | C(8)  | 3.262(2) | C(19) | C(9)               | 3.339(2) |
| C(19) | C(10) | 3.441(2) | C(19) | C(18)              | 2.551(2) |
| C(19) | C(21) | 2.604(2) | C(19) | C(25)              | 2.327(2) |
| C(19) | C(26) | 2.305(2) | C(20) | O(2)               | 2.446(2) |
| C(20) | O(3)  | 3.508(2) | C(20) | N(2)               | 3.439(2) |

**Table S12.** Distances beyond the asymmetric unit out to 3.60 Å (continued)

| atom  | atom                | distance | atom  | atom                | distance |
|-------|---------------------|----------|-------|---------------------|----------|
| C(20) | N(3)                | 2.307(2) | C(20) | C(9)                | 3.563(2) |
| C(20) | C(10)               | 3.267(2) | C(20) | C(22)               | 2.367(2) |
| C(20) | C(23)               | 2.746(2) | C(20) | C(24)               | 2.422(2) |
| C(20) | C(26)               | 2.319(2) | C(21) | O(2)                | 3.159(2) |
| C(21) | N(2)                | 3.452(2) | C(21) | C(11)               | 3.472(2) |
| C(21) | C(19)               | 2.604(2) | C(21) | C(23)               | 2.425(2) |
| C(21) | C(24)               | 2.837(2) | C(21) | C(25)               | 2.415(2) |
| C(22) | O(2) <sup>11)</sup> | 3.453(2) | C(22) | N(2) <sup>5)</sup>  | 3.491(2) |
| C(22) | C(20)               | 2.367(2) | C(22) | C(24)               | 2.425(2) |
| C(22) | C(25)               | 2.742(2) | C(23) | N(2) <sup>5)</sup>  | 3.190(2) |
| C(23) | C(10) <sup>5)</sup> | 3.300(2) | C(23) | C(20)               | 2.746(2) |
| C(23) | C(21)               | 2.425(2) | C(23) | C(25)               | 2.365(2) |
| C(24) | O(3)                | 3.142(2) | C(24) | N(1) <sup>5)</sup>  | 3.329(2) |
| C(24) | C(3) <sup>12)</sup> | 3.597(2) | C(24) | C(8) <sup>5)</sup>  | 3.329(2) |
| C(24) | C(9) <sup>5)</sup>  | 3.374(2) | C(24) | C(10) <sup>5)</sup> | 3.556(2) |
| C(24) | C(20)               | 2.422(2) | C(24) | C(21)               | 2.837(2) |
| C(24) | C(22)               | 2.425(2) | C(24) | C(26)               | 2.597(2) |
| C(25) | O(2)                | 3.510(2) | C(25) | O(3)                | 2.440(2) |
| C(25) | N(1) <sup>5)</sup>  | 3.278(2) | C(25) | N(3)                | 2.299(2) |
| C(25) | C(1) <sup>5)</sup>  | 3.465(2) | C(25) | C(8) <sup>5)</sup>  | 3.584(2) |
| C(25) | C(19)               | 2.327(2) | C(25) | C(21)               | 2.415(2) |
| C(25) | C(22)               | 2.742(2) | C(25) | C(23)               | 2.365(2) |
| C(26) | O(2)                | 3.463(2) | C(26) | C(1) <sup>5)</sup>  | 3.457(2) |
| C(26) | C(6) <sup>5)</sup>  | 3.498(2) | C(26) | C(9)                | 3.428(2) |
| C(26) | C(16)               | 3.392(2) | C(26) | C(17)               | 3.135(2) |

C(26) C(18) 2.518(2) C(26) C(19) 2.305(2)

C(26) C(20) 2.319(2) C(26) C(24) 2.597(2)

Symmetry Operators:

(1) X+1,Y,Z (2) -X+1,Y+1/2-1,-Z+1

(3) X,Y-1,Z (4) -X,Y+1/2-1,-Z+1

(5) X-1,Y,Z (6) -X+1,Y+1/2,-Z+2

(7) X+1,Y-1,Z (8) -X+1,Y+1/2-1,-Z+2

(9) -X+1,Y+1/2,-Z+1 (10) X,Y+1,Z

(11) -X,Y+1/2,-Z+1 (12) X-1,Y+1,Z

**Table S13.** Distances beyond the asymmetric unit out to 3.60 Å involving hydrogens

| atom | atom                | distance  | atom | atom                | distance |
|------|---------------------|-----------|------|---------------------|----------|
| O(1) | H(3) <sup>1)</sup>  | 3.531     | O(1) | H(4)                | 3.139    |
| O(1) | H(8) <sup>2)</sup>  | 2.947     | O(1) | H(9)                | 2.519    |
| O(1) | H(10)               | 2.585     | O(1) | H(10) <sup>3)</sup> | 3.102    |
| O(1) | H(11)               | 2.457     | O(1) | H(13) <sup>3)</sup> | 3.070    |
| O(1) | H(17) <sup>4)</sup> | 3.582     | O(2) | H(1) <sup>5)</sup>  | 3.488    |
| O(2) | H(5) <sup>6)</sup>  | 2.985     | O(2) | H(7) <sup>7)</sup>  | 2.574    |
| O(2) | H(12)               | 2.565     | O(2) | H(13)               | 3.578    |
| O(2) | H(14)               | 3.038     | O(2) | H(15) <sup>8)</sup> | 2.521    |
| O(2) | H(2A)               | 3.20(2)   | O(3) | H(3) <sup>3)</sup>  | 2.734    |
| O(3) | H(4) <sup>3)</sup>  | 2.622     | O(3) | H(9)                | 3.478    |
| O(3) | H(11)               | 2.542     | O(3) | H(13)               | 2.865    |
| O(3) | H(17)               | 3.018     | O(3) | H(1A) <sup>5)</sup> | 1.99(2)  |
| N(1) | H(1)                | 2.752     | N(1) | H(5) <sup>6)</sup>  | 3.254    |
| N(1) | H(6) <sup>6)</sup>  | 3.241     | N(1) | H(12)               | 3.224    |
| N(1) | H(1A)               | 3.492(19) | N(1) | H(2A)               | 2.23(2)  |
| N(2) | H(5)                | 2.071     | N(2) | H(6)                | 3.147    |
| N(2) | H(6) <sup>6)</sup>  | 2.849     | N(2) | H(14)               | 3.378    |
| N(2) | H(15) <sup>4)</sup> | 3.574     | N(2) | H(16) <sup>4)</sup> | 3.075    |
| N(3) | H(10)               | 3.299     | N(3) | H(11)               | 2.580    |
| N(3) | H(12)               | 2.022     | N(3) | H(13)               | 2.022    |
| C(1) | H(1)                | 2.049     | C(1) | H(2)                | 3.235    |



|      |                     |         |      |                     |         |
|------|---------------------|---------|------|---------------------|---------|
| C(1) | H(4)                | 3.274   | C(1) | H(5) <sup>6)</sup>  | 3.333   |
| C(1) | H(12)               | 3.045   | C(1) | H(1A)               | 3.37(2) |
| C(1) | H(2A)               | 3.52(2) | C(2) | H(2)                | 2.032   |
| C(2) | H(3)                | 3.279   | C(2) | H(5) <sup>6)</sup>  | 2.946   |
| C(3) | H(1)                | 2.053   | C(3) | H(3)                | 2.035   |
| C(3) | H(4)                | 3.271   | C(3) | H(7) <sup>9)</sup>  | 3.226   |
| C(3) | H(13) <sup>4)</sup> | 3.325   | C(3) | H(16) <sup>9)</sup> | 3.361   |
| C(3) | H(17) <sup>9)</sup> | 3.032   | C(4) | H(1)                | 3.287   |
| C(4) | H(2)                | 2.029   | C(4) | H(4)                | 2.044   |
| C(4) | H(11) <sup>2)</sup> | 3.418   | C(4) | H(13) <sup>4)</sup> | 2.919   |
| C(4) | H(17) <sup>9)</sup> | 3.360   | C(5) | H(2)                | 3.262   |
| C(5) | H(3)                | 2.036   | C(5) | H(9) <sup>2)</sup>  | 3.345   |
| C(5) | H(10)               | 3.045   | C(5) | H(11) <sup>2)</sup> | 3.067   |
| C(5) | H(12)               | 3.480   | C(5) | H(13) <sup>4)</sup> | 3.252   |
| C(5) | H(1A)               | 3.16(2) | C(6) | H(1)                | 3.290   |
| C(6) | H(3)                | 3.239   | C(6) | H(4)                | 2.033   |

**Table S13.** Distances beyond the asymmetric unit out to 3.60 Å involving hydrogens (continued)

| atom  | atom  | distance | atom  | atom                | distance  |
|-------|-------|----------|-------|---------------------|-----------|
| C(6)  | H(10) | 2.695    | C(6)  | H(11)               | 3.361     |
| C(6)  | H(12) | 2.767    | C(6)  | H(1A)               | 2.53(2)   |
| C(7)  | H(4)  | 2.886    | C(7)  | H(9)                | 2.779     |
| C(7)  | H(10) | 2.072    | C(7)  | H(11)               | 2.072     |
| C(7)  | H(12) | 2.711    | C(7)  | H(13)               | 3.414     |
| C(7)  | H(1A) | 1.93(2)  | C(8)  | H(9)                | 2.683     |
| C(8)  | H(10) | 3.398    | C(8)  | H(11)               | 2.868     |
| C(8)  | H(12) | 3.060    | C(8)  | H(17) <sup>4)</sup> | 3.254     |
| C(8)  | H(1A) | 2.75(2)  | C(8)  | H(2A)               | 2.824(19) |
| C(9)  | H(8)  | 3.295    | C(9)  | H(9)                | 2.038     |
| C(9)  | H(11) | 3.178    | C(9)  | H(17) <sup>4)</sup> | 3.105     |
| C(9)  | H(1A) | 3.49(2)  | C(9)  | H(2A)               | 2.74(2)   |
| C(10) | H(5)  | 3.144    | C(10) | H(6)                | 3.198     |
| C(10) | H(7)  | 3.291    | C(10) | H(9)                | 3.244     |

|       |                      |         |       |                      |         |
|-------|----------------------|---------|-------|----------------------|---------|
| C(10) | H(16) <sup>4)</sup>  | 3.042   | C(10) | H(17) <sup>4)</sup>  | 3.508   |
| C(10) | H(2A)                | 1.96(2) | C(11) | H(1) <sup>10)</sup>  | 2.910   |
| C(11) | H(6)                 | 2.067   | C(11) | H(6) <sup>6)</sup>   | 3.367   |
| C(11) | H(14)                | 3.321   | C(11) | H(15) <sup>4)</sup>  | 3.573   |
| C(11) | H(16) <sup>4)</sup>  | 3.276   | C(11) | H(2A)                | 2.02(2) |
| C(11) | H(2A) <sup>10)</sup> | 3.33(2) | C(12) | H(1) <sup>10)</sup>  | 3.284   |
| C(12) | H(5)                 | 2.056   | C(12) | H(5) <sup>10)</sup>  | 3.544   |
| C(12) | H(7)                 | 2.907   | C(12) | H(16) <sup>4)</sup>  | 3.393   |
| C(12) | H(2A)                | 3.06(2) | C(12) | H(2A) <sup>10)</sup> | 2.79(2) |
| C(13) | H(5)                 | 3.166   | C(13) | H(6)                 | 2.138   |
| C(13) | H(7)                 | 2.058   | C(13) | H(8)                 | 3.256   |
| C(13) | H(16) <sup>4)</sup>  | 3.243   | C(13) | H(2A)                | 3.05(2) |
| C(14) | H(2) <sup>11)</sup>  | 2.975   | C(14) | H(6)                 | 3.000   |
| C(14) | H(8)                 | 2.017   | C(14) | H(9)                 | 3.266   |
| C(14) | H(12) <sup>12)</sup> | 3.271   | C(15) | H(2) <sup>11)</sup>  | 3.340   |
| C(15) | H(7)                 | 2.028   | C(15) | H(9)                 | 2.041   |
| C(15) | H(10) <sup>3)</sup>  | 3.355   | C(15) | H(12) <sup>12)</sup> | 3.250   |
| C(16) | H(4) <sup>3)</sup>   | 3.231   | C(16) | H(7)                 | 3.279   |
| C(16) | H(8)                 | 2.043   | C(16) | H(10) <sup>3)</sup>  | 2.959   |
| C(16) | H(11)                | 2.928   | C(16) | H(17) <sup>4)</sup>  | 3.444   |
| C(16) | H(1A)                | 3.57(2) | C(17) | H(4)                 | 3.297   |
| C(17) | H(4) <sup>3)</sup>   | 3.495   | C(17) | H(9)                 | 2.971   |
| C(17) | H(9) <sup>2)</sup>   | 3.212   | C(17) | H(12)                | 2.072   |

**Table S13.** Distances beyond the asymmetric unit out to 3.60 Å involving hydrogens (continued)

| atom  | atom               | distance | atom  | atom                | distance |
|-------|--------------------|----------|-------|---------------------|----------|
| C(17) | H(13)              | 2.072    | C(17) | H(1A)               | 3.15(2)  |
| C(18) | H(7) <sup>7)</sup> | 3.543    | C(18) | H(8) <sup>7)</sup>  | 3.358    |
| C(18) | H(10)              | 2.061    | C(18) | H(11)               | 2.061    |
| C(19) | H(1) <sup>5)</sup> | 3.351    | C(19) | H(7) <sup>7)</sup>  | 3.447    |
| C(19) | H(12)              | 2.608    | C(19) | H(13)               | 3.157    |
| C(19) | H(14)              | 2.859    | C(19) | H(15) <sup>8)</sup> | 3.244    |
| C(19) | H(2A)              | 3.38(2)  | C(20) | H(1) <sup>5)</sup>  | 3.469    |

|       |                      |         |       |                     |         |
|-------|----------------------|---------|-------|---------------------|---------|
| C(20) | H(14)                | 2.044   | C(20) | H(15)               | 3.229   |
| C(20) | H(15) <sup>8)</sup>  | 3.580   | C(20) | H(17)               | 3.283   |
| C(21) | H(6) <sup>8)</sup>   | 3.040   | C(21) | H(15)               | 2.035   |
| C(21) | H(15) <sup>8)</sup>  | 3.358   | C(21) | H(16)               | 3.275   |
| C(22) | H(6) <sup>8)</sup>   | 3.045   | C(22) | H(14)               | 2.054   |
| C(22) | H(14) <sup>13)</sup> | 3.132   | C(22) | H(16)               | 2.032   |
| C(22) | H(17)                | 3.288   | C(22) | H(2A) <sup>5)</sup> | 3.34(2) |
| C(23) | H(2) <sup>11)</sup>  | 3.059   | C(23) | H(14)               | 3.287   |
| C(23) | H(14) <sup>13)</sup> | 3.114   | C(23) | H(15)               | 2.033   |
| C(23) | H(17)                | 2.054   | C(23) | H(2A) <sup>5)</sup> | 3.26(2) |
| C(24) | H(2) <sup>11)</sup>  | 2.878   | C(24) | H(15)               | 3.274   |
| C(24) | H(16)                | 2.033   | C(24) | H(1A) <sup>5)</sup> | 3.54(2) |
| C(25) | H(14)                | 3.277   | C(25) | H(16)               | 3.228   |
| C(25) | H(17)                | 2.047   | C(25) | H(1A) <sup>5)</sup> | 3.41(2) |
| C(26) | H(4) <sup>3)</sup>   | 3.491   | C(26) | H(9)                | 3.479   |
| C(26) | H(11)                | 2.750   | C(26) | H(12)               | 3.305   |
| C(26) | H(13)                | 2.765   | C(26) | H(17)               | 2.854   |
| C(26) | H(1A) <sup>5)</sup>  | 2.79(2) | H(1)  | O(2) <sup>4)</sup>  | 3.488   |
| H(1)  | N(1)                 | 2.752   | H(1)  | C(1)                | 2.049   |
| H(1)  | C(3)                 | 2.053   | H(1)  | C(4)                | 3.287   |
| H(1)  | C(6)                 | 3.290   | H(1)  | C(11) <sup>6)</sup> | 2.910   |
| H(1)  | C(12) <sup>6)</sup>  | 3.284   | H(1)  | C(19) <sup>4)</sup> | 3.351   |
| H(1)  | C(20) <sup>4)</sup>  | 3.469   | H(1)  | H(2)                | 2.348   |
| H(1)  | H(5) <sup>6)</sup>   | 2.348   | H(1)  | H(6) <sup>6)</sup>  | 3.123   |
| H(1)  | H(14) <sup>6)</sup>  | 3.173   | H(1)  | H(15) <sup>6)</sup> | 3.090   |
| H(1)  | H(16) <sup>9)</sup>  | 3.374   | H(2)  | C(1)                | 3.235   |
| H(2)  | C(2)                 | 2.032   | H(2)  | C(4)                | 2.029   |
| H(2)  | C(5)                 | 3.262   | H(2)  | C(14) <sup>9)</sup> | 2.975   |
| H(2)  | C(15) <sup>9)</sup>  | 3.340   | H(2)  | C(23) <sup>9)</sup> | 3.059   |
| H(2)  | C(24) <sup>9)</sup>  | 2.878   | H(2)  | H(1)                | 2.348   |

**Table S13.** Distances beyond the asymmetric unit out to 3.60 Å involving hydrogens (continued)

| atom | atom | distance | atom | atom | distance |
|------|------|----------|------|------|----------|
|------|------|----------|------|------|----------|

|      |                      |       |      |                      |       |
|------|----------------------|-------|------|----------------------|-------|
| H(2) | H(3)                 | 2.324 | H(2) | H(7) <sup>9)</sup>   | 2.534 |
| H(2) | H(8) <sup>9)</sup>   | 3.193 | H(2) | H(16) <sup>9)</sup>  | 2.801 |
| H(2) | H(17) <sup>9)</sup>  | 2.483 | H(3) | O(1) <sup>14)</sup>  | 3.531 |
| H(3) | O(3) <sup>2)</sup>   | 2.734 | H(3) | C(2)                 | 3.279 |
| H(3) | C(3)                 | 2.035 | H(3) | C(5)                 | 2.036 |
| H(3) | C(6)                 | 3.239 | H(3) | H(2)                 | 2.324 |
| H(3) | H(4)                 | 2.346 | H(3) | H(8) <sup>9)</sup>   | 3.139 |
| H(3) | H(11) <sup>2)</sup>  | 3.176 | H(3) | H(13) <sup>4)</sup>  | 2.987 |
| H(3) | H(17) <sup>9)</sup>  | 3.113 | H(3) | H(1A) <sup>14)</sup> | 3.020 |
| H(4) | O(1)                 | 3.139 | H(4) | O(3) <sup>2)</sup>   | 2.622 |
| H(4) | C(1)                 | 3.274 | H(4) | C(3)                 | 3.271 |
| H(4) | C(4)                 | 2.044 | H(4) | C(6)                 | 2.033 |
| H(4) | C(7)                 | 2.886 | H(4) | C(16) <sup>2)</sup>  | 3.231 |
| H(4) | C(17)                | 3.297 | H(4) | C(17) <sup>2)</sup>  | 3.495 |
| H(4) | C(26) <sup>2)</sup>  | 3.491 | H(4) | H(3)                 | 2.346 |
| H(4) | H(8) <sup>2)</sup>   | 3.327 | H(4) | H(9) <sup>2)</sup>   | 2.542 |
| H(4) | H(10)                | 2.780 | H(4) | H(11) <sup>2)</sup>  | 2.513 |
| H(4) | H(13) <sup>4)</sup>  | 3.518 | H(4) | H(1A)                | 3.190 |
| H(5) | O(2) <sup>10)</sup>  | 2.985 | H(5) | N(1) <sup>10)</sup>  | 3.254 |
| H(5) | N(2)                 | 2.071 | H(5) | C(1) <sup>10)</sup>  | 3.333 |
| H(5) | C(2) <sup>10)</sup>  | 2.946 | H(5) | C(10)                | 3.144 |
| H(5) | C(12)                | 2.056 | H(5) | C(12) <sup>6)</sup>  | 3.544 |
| H(5) | C(13)                | 3.166 | H(5) | H(1) <sup>10)</sup>  | 2.348 |
| H(5) | H(6)                 | 2.467 | H(5) | H(6) <sup>6)</sup>   | 3.171 |
| H(5) | H(7) <sup>6)</sup>   | 3.477 | H(5) | H(14)                | 3.448 |
| H(5) | H(15) <sup>4)</sup>  | 3.491 | H(5) | H(2A)                | 2.455 |
| H(5) | H(2A) <sup>10)</sup> | 3.270 | H(6) | N(1) <sup>10)</sup>  | 3.241 |
| H(6) | N(2)                 | 3.147 | H(6) | N(2) <sup>10)</sup>  | 2.849 |
| H(6) | C(10)                | 3.198 | H(6) | C(11)                | 2.067 |
| H(6) | C(11) <sup>10)</sup> | 3.367 | H(6) | C(13)                | 2.138 |
| H(6) | C(14)                | 3.000 | H(6) | C(21) <sup>13)</sup> | 3.040 |
| H(6) | C(22) <sup>13)</sup> | 3.045 | H(6) | H(1) <sup>10)</sup>  | 3.123 |
| H(6) | H(5)                 | 2.467 | H(6) | H(5) <sup>10)</sup>  | 3.171 |
| H(6) | H(7)                 | 2.982 | H(6) | H(14) <sup>13)</sup> | 3.040 |

|      |                      |       |      |                      |       |
|------|----------------------|-------|------|----------------------|-------|
| H(6) | H(15) <sup>13)</sup> | 3.036 | H(6) | H(2A) <sup>10)</sup> | 2.173 |
| H(7) | O(2) <sup>12)</sup>  | 2.574 | H(7) | C(3) <sup>11)</sup>  | 3.226 |
| H(7) | C(10)                | 3.291 | H(7) | C(12)                | 2.907 |

**Table S13.** Distances beyond the asymmetric unit out to 3.60 Å involving hydrogens (continued)

| atom  | atom                 | distance | atom  | atom                 | distance |
|-------|----------------------|----------|-------|----------------------|----------|
| H(7)  | C(13)                | 2.058    | H(7)  | C(15)                | 2.028    |
| H(7)  | C(16)                | 3.279    | H(7)  | C(18) <sup>12)</sup> | 3.543    |
| H(7)  | C(19) <sup>12)</sup> | 3.447    | H(7)  | H(2) <sup>11)</sup>  | 2.534    |
| H(7)  | H(5) <sup>10)</sup>  | 3.477    | H(7)  | H(6)                 | 2.982    |
| H(7)  | H(8)                 | 2.320    | H(7)  | H(12) <sup>12)</sup> | 2.740    |
| H(7)  | H(15) <sup>13)</sup> | 3.409    | H(8)  | O(1) <sup>3)</sup>   | 2.947    |
| H(8)  | C(9)                 | 3.295    | H(8)  | C(13)                | 3.256    |
| H(8)  | C(14)                | 2.017    | H(8)  | C(16)                | 2.043    |
| H(8)  | C(18) <sup>12)</sup> | 3.358    | H(8)  | H(2) <sup>11)</sup>  | 3.193    |
| H(8)  | H(3) <sup>11)</sup>  | 3.139    | H(8)  | H(4) <sup>3)</sup>   | 3.327    |
| H(8)  | H(7)                 | 2.320    | H(8)  | H(9)                 | 2.330    |
| H(8)  | H(10) <sup>3)</sup>  | 3.022    | H(8)  | H(12) <sup>12)</sup> | 2.689    |
| H(8)  | H(13) <sup>12)</sup> | 3.110    | H(8)  | H(1A) <sup>3)</sup>  | 3.302    |
| H(9)  | O(1)                 | 2.519    | H(9)  | O(3)                 | 3.478    |
| H(9)  | C(5) <sup>3)</sup>   | 3.345    | H(9)  | C(7)                 | 2.779    |
| H(9)  | C(8)                 | 2.683    | H(9)  | C(9)                 | 2.038    |
| H(9)  | C(10)                | 3.244    | H(9)  | C(14)                | 3.266    |
| H(9)  | C(15)                | 2.041    | H(9)  | C(17)                | 2.971    |
| H(9)  | C(17) <sup>3)</sup>  | 3.212    | H(9)  | C(26)                | 3.479    |
| H(9)  | H(4) <sup>3)</sup>   | 2.542    | H(9)  | H(8)                 | 2.330    |
| H(9)  | H(10) <sup>3)</sup>  | 2.230    | H(9)  | H(11)                | 2.328    |
| H(9)  | H(1A)                | 3.087    | H(10) | O(1)                 | 2.585    |
| H(10) | O(1) <sup>2)</sup>   | 3.102    | H(10) | N(3)                 | 3.299    |
| H(10) | C(5)                 | 3.045    | H(10) | C(6)                 | 2.695    |
| H(10) | C(7)                 | 2.072    | H(10) | C(8)                 | 3.398    |
| H(10) | C(15) <sup>2)</sup>  | 3.355    | H(10) | C(16) <sup>2)</sup>  | 2.959    |
| H(10) | C(18)                | 2.061    | H(10) | H(4)                 | 2.780    |

|       |                     |       |       |                    |       |
|-------|---------------------|-------|-------|--------------------|-------|
| H(10) | H(8) <sup>2)</sup>  | 3.022 | H(10) | H(9) <sup>2)</sup> | 2.230 |
| H(10) | H(11)               | 1.595 | H(10) | H(12)              | 2.466 |
| H(10) | H(13)               | 2.242 | H(10) | H(1A)              | 3.334 |
| H(10) | H(1A) <sup>2)</sup> | 3.458 | H(11) | O(1)               | 2.457 |
| H(11) | O(3)                | 2.542 | H(11) | N(3)               | 2.580 |
| H(11) | C(4) <sup>3)</sup>  | 3.418 | H(11) | C(5) <sup>3)</sup> | 3.067 |
| H(11) | C(6)                | 3.361 | H(11) | C(7)               | 2.072 |
| H(11) | C(8)                | 2.868 | H(11) | C(9)               | 3.178 |
| H(11) | C(16)               | 2.928 | H(11) | C(18)              | 2.061 |
| H(11) | C(26)               | 2.750 | H(11) | H(3) <sup>3)</sup> | 3.176 |

**Table S13.** Distances beyond the asymmetric unit out to 3.60 Å involving hydrogens (continued)

| atom  | atom                | distance | atom  | atom                | distance |
|-------|---------------------|----------|-------|---------------------|----------|
| H(11) | H(4) <sup>3)</sup>  | 2.513    | H(11) | H(9)                | 2.328    |
| H(11) | H(10)               | 1.595    | H(11) | H(12)               | 2.848    |
| H(11) | H(13)               | 2.456    | H(11) | H(1A)               | 3.333    |
| H(12) | O(2)                | 2.565    | H(12) | N(1)                | 3.224    |
| H(12) | N(3)                | 2.022    | H(12) | C(1)                | 3.045    |
| H(12) | C(5)                | 3.480    | H(12) | C(6)                | 2.767    |
| H(12) | C(7)                | 2.711    | H(12) | C(8)                | 3.060    |
| H(12) | C(14) <sup>7)</sup> | 3.271    | H(12) | C(15) <sup>7)</sup> | 3.250    |
| H(12) | C(17)               | 2.072    | H(12) | C(19)               | 2.608    |
| H(12) | C(26)               | 3.305    | H(12) | H(7) <sup>7)</sup>  | 2.740    |
| H(12) | H(8) <sup>7)</sup>  | 2.689    | H(12) | H(10)               | 2.466    |
| H(12) | H(11)               | 2.848    | H(12) | H(13)               | 1.600    |
| H(13) | O(1) <sup>2)</sup>  | 3.070    | H(13) | O(2)                | 3.578    |
| H(13) | O(3)                | 2.865    | H(13) | N(3)                | 2.022    |
| H(13) | C(3) <sup>5)</sup>  | 3.325    | H(13) | C(4) <sup>5)</sup>  | 2.919    |
| H(13) | C(5) <sup>5)</sup>  | 3.252    | H(13) | C(7)                | 3.414    |
| H(13) | C(17)               | 2.072    | H(13) | C(19)               | 3.157    |
| H(13) | C(26)               | 2.765    | H(13) | H(3) <sup>5)</sup>  | 2.987    |
| H(13) | H(4) <sup>5)</sup>  | 3.518    | H(13) | H(8) <sup>7)</sup>  | 3.110    |
| H(13) | H(10)               | 2.242    | H(13) | H(11)               | 2.456    |
| H(13) | H(12)               | 1.600    | H(13) | H(1A) <sup>2)</sup> | 3.030    |

|       |                      |       |       |                     |       |
|-------|----------------------|-------|-------|---------------------|-------|
| H(14) | O(2)                 | 3.038 | H(14) | N(2)                | 3.378 |
| H(14) | C(11)                | 3.321 | H(14) | C(19)               | 2.859 |
| H(14) | C(20)                | 2.044 | H(14) | C(22)               | 2.054 |
| H(14) | C(22) <sup>8)</sup>  | 3.132 | H(14) | C(23)               | 3.287 |
| H(14) | C(23) <sup>8)</sup>  | 3.114 | H(14) | C(25)               | 3.277 |
| H(14) | H(1) <sup>10)</sup>  | 3.173 | H(14) | H(5)                | 3.448 |
| H(14) | H(6) <sup>8)</sup>   | 3.040 | H(14) | H(15)               | 2.354 |
| H(14) | H(15) <sup>8)</sup>  | 2.711 | H(14) | H(16) <sup>8)</sup> | 2.671 |
| H(14) | H(2A)                | 3.534 | H(15) | O(2) <sup>13)</sup> | 2.521 |
| H(15) | N(2) <sup>5)</sup>   | 3.574 | H(15) | C(11) <sup>5)</sup> | 3.573 |
| H(15) | C(19) <sup>13)</sup> | 3.244 | H(15) | C(20)               | 3.229 |
| H(15) | C(20) <sup>13)</sup> | 3.580 | H(15) | C(21)               | 2.035 |
| H(15) | C(21) <sup>13)</sup> | 3.358 | H(15) | C(23)               | 2.033 |
| H(15) | C(24)                | 3.274 | H(15) | H(1) <sup>10)</sup> | 3.090 |
| H(15) | H(5) <sup>5)</sup>   | 3.491 | H(15) | H(6) <sup>8)</sup>  | 3.036 |
| H(15) | H(7) <sup>8)</sup>   | 3.409 | H(15) | H(14)               | 2.354 |

**Table S13.** Distances beyond the asymmetric unit out to 3.60 Å involving hydrogens (continued)

| atom  | atom                 | distance | atom  | atom                 | distance |
|-------|----------------------|----------|-------|----------------------|----------|
| H(15) | H(14) <sup>13)</sup> | 2.711    | H(15) | H(16)                | 2.322    |
| H(15) | H(2A) <sup>5)</sup>  | 3.508    | H(16) | N(2) <sup>5)</sup>   | 3.075    |
| H(16) | C(3) <sup>11)</sup>  | 3.361    | H(16) | C(10) <sup>5)</sup>  | 3.042    |
| H(16) | C(11) <sup>5)</sup>  | 3.276    | H(16) | C(12) <sup>5)</sup>  | 3.393    |
| H(16) | C(13) <sup>5)</sup>  | 3.243    | H(16) | C(21)                | 3.275    |
| H(16) | C(22)                | 2.032    | H(16) | C(24)                | 2.033    |
| H(16) | C(25)                | 3.228    | H(16) | H(1) <sup>11)</sup>  | 3.374    |
| H(16) | H(2) <sup>11)</sup>  | 2.801    | H(16) | H(14) <sup>13)</sup> | 2.671    |
| H(16) | H(15)                | 2.322    | H(16) | H(17)                | 2.353    |
| H(16) | H(2A) <sup>5)</sup>  | 3.389    | H(17) | O(1) <sup>5)</sup>   | 3.582    |
| H(17) | O(3)                 | 3.018    | H(17) | C(3) <sup>11)</sup>  | 3.032    |
| H(17) | C(4) <sup>11)</sup>  | 3.360    | H(17) | C(8) <sup>5)</sup>   | 3.254    |
| H(17) | C(9) <sup>5)</sup>   | 3.105    | H(17) | C(10) <sup>5)</sup>  | 3.508    |
| H(17) | C(16) <sup>5)</sup>  | 3.444    | H(17) | C(20)                | 3.283    |
| H(17) | C(22)                | 3.288    | H(17) | C(23)                | 2.054    |

|       |                     |         |       |                     |           |
|-------|---------------------|---------|-------|---------------------|-----------|
| H(17) | C(25)               | 2.047   | H(17) | C(26)               | 2.854     |
| H(17) | H(2) <sup>11)</sup> | 2.483   | H(17) | H(3) <sup>11)</sup> | 3.113     |
| H(17) | H(16)               | 2.353   | H(17) | H(1A) <sup>5)</sup> | 3.107     |
| H(1A) | O(3) <sup>4)</sup>  | 1.99(2) | H(1A) | N(1)                | 3.492(19) |
| H(1A) | C(1)                | 3.37(2) | H(1A) | C(5)                | 3.16(2)   |
| H(1A) | C(6)                | 2.53(2) | H(1A) | C(7)                | 1.93(2)   |
| H(1A) | C(8)                | 2.75(2) | H(1A) | C(9)                | 3.49(2)   |
| H(1A) | C(16)               | 3.57(2) | H(1A) | C(17)               | 3.15(2)   |
| H(1A) | C(24) <sup>4)</sup> | 3.54(2) | H(1A) | C(25) <sup>4)</sup> | 3.41(2)   |
| H(1A) | C(26) <sup>4)</sup> | 2.79(2) | H(1A) | H(3) <sup>1)</sup>  | 3.020     |
| H(1A) | H(4)                | 3.190   | H(1A) | H(8) <sup>2)</sup>  | 3.302     |
| H(1A) | H(9)                | 3.087   | H(1A) | H(10)               | 3.334     |
| H(1A) | H(10) <sup>3)</sup> | 3.458   | H(1A) | H(11)               | 3.333     |
| H(1A) | H(13) <sup>3)</sup> | 3.030   | H(1A) | H(17) <sup>4)</sup> | 3.107     |
| H(2A) | O(2)                | 3.20(2) | H(2A) | N(1)                | 2.23(2)   |
| H(2A) | C(1)                | 3.52(2) | H(2A) | C(8)                | 2.824(19) |
| H(2A) | C(9)                | 2.74(2) | H(2A) | C(10)               | 1.96(2)   |
| H(2A) | C(11)               | 2.02(2) | H(2A) | C(11) <sup>6)</sup> | 3.33(2)   |
| H(2A) | C(12)               | 3.06(2) | H(2A) | C(12) <sup>6)</sup> | 2.79(2)   |
| H(2A) | C(13)               | 3.05(2) | H(2A) | C(19)               | 3.38(2)   |
| H(2A) | C(22) <sup>4)</sup> | 3.34(2) | H(2A) | C(23) <sup>4)</sup> | 3.26(2)   |
| H(2A) | H(5)                | 2.455   | H(2A) | H(5) <sup>6)</sup>  | 3.270     |

**Table S13.** Distances beyond the asymmetric unit out to 3.60 Å involving hydrogens (continued)

| atom  | atom                | distance | atom  | atom                | distance |
|-------|---------------------|----------|-------|---------------------|----------|
| H(2A) | H(6) <sup>6)</sup>  | 2.173    | H(2A) | H(14)               | 3.534    |
| H(2A) | H(15) <sup>4)</sup> | 3.508    | H(2A) | H(16) <sup>4)</sup> | 3.389    |

Symmetry Operators:

|      |                 |      |                   |
|------|-----------------|------|-------------------|
| (1)  | -X+2,Y+1/2,-Z+2 | (2)  | -X+1,Y+1/2-1,-Z+2 |
| (3)  | -X+1,Y+1/2,-Z+2 | (4)  | X+1,Y,Z           |
| (5)  | X-1,Y,Z         | (6)  | -X+1,Y+1/2-1,-Z+1 |
| (7)  | X,Y-1,Z         | (8)  | -X,Y+1/2-1,-Z+1   |
| (9)  | X+1,Y-1,Z       | (10) | -X+1,Y+1/2,-Z+1   |
| (11) | X-1,Y+1,Z       | (12) | X,Y+1,Z           |
| (13) | -X,Y+1/2,-Z+1   | (14) | -X+2,Y+1/2-1,-Z+2 |



# L. Chromatograms.

0.0-4, 0.2 ml/min, 80:20 Hex: EtOH

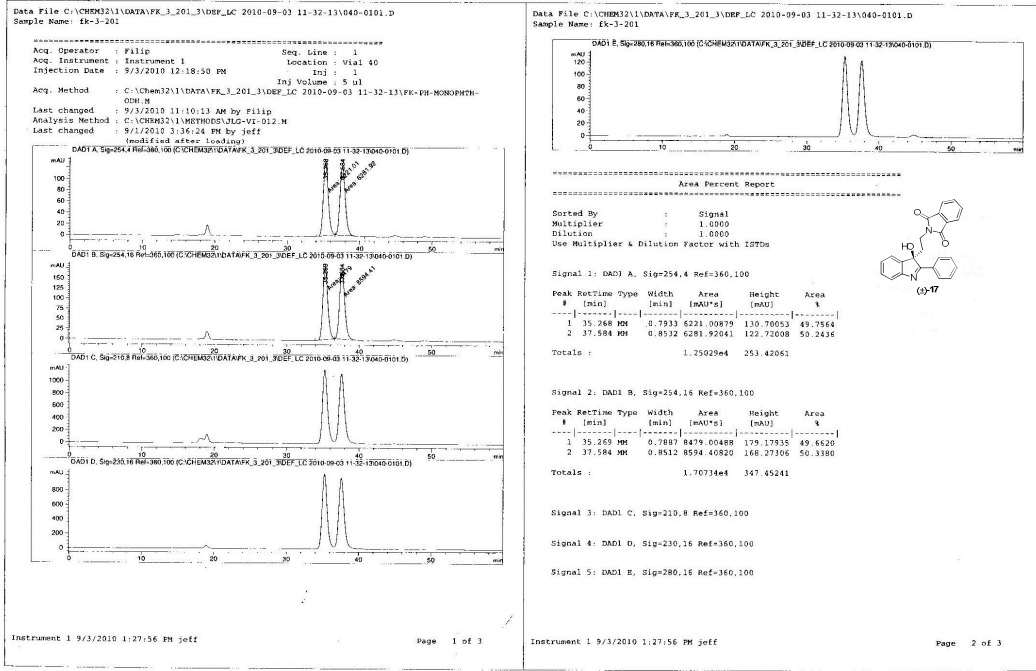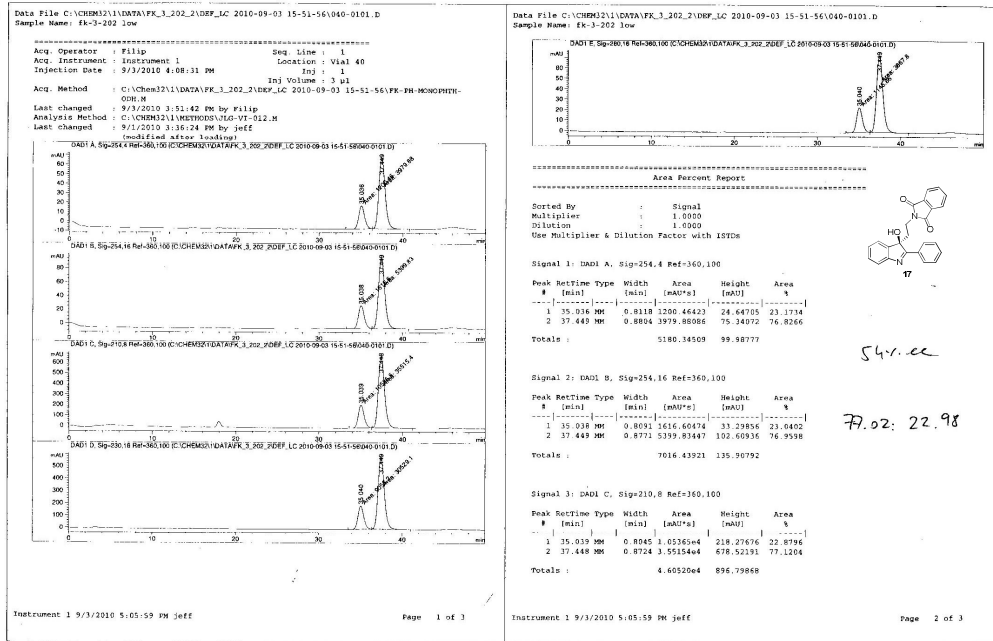

Data File C:\CHEM2\1\DATA\FK\_3\_140\_3\DEF\_LC 2010-06-22 18-21-12\030-0101.D  
 Sample Name: FK-3-140

Acq. Operator : Filip  
 Acq. Instrument : Instrument 2  
 Injection Date : 6/22/2010 5:28:49 PM  
 Seq. Line : 1  
 Location : Vial 30  
 Inj Volume : 15 µl

Acq. Method : C:\Chem2\1\DATA\FK\_3\_140\_3\DEF\_LC 2010-06-22 18-21-12\FK-NPHTH-PHTH.M  
 Last changed : 6/22/2010 5:19:47 PM by Filip  
 Analysis Method : C:\CHEM2\1\DATA\FK\_3\_140\_3\DEF\_LC 2010-06-22 18-21-12\030-0101.D\DA.M (FK-NPHTH-PHTH.M)  
 Last changed : 6/22/2010 5:19:47 PM by Filip  
 Method Info : chiralcol.D

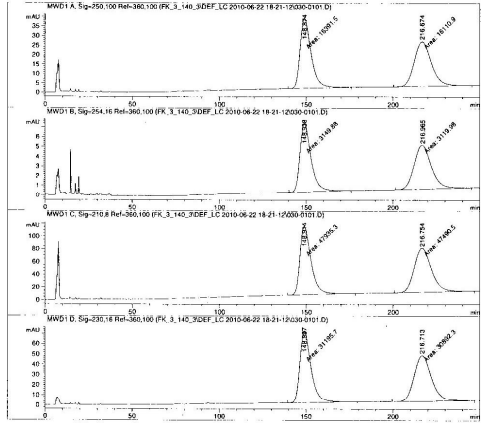

Data File C:\CHEM2\1\DATA\FK\_3\_140\_3\DEF\_LC 2010-06-22 18-21-12\030-0101.D  
 Sample Name: FK-3-140

MWD1 E. Sig=250.16 Ref=360.100 (FK\_3\_140\_3\DEF\_LC 2010-06-22 18-21-12\030-0101.D)

Area Percent Report

Sorted By : Signal  
 Multiplier : 1.0000  
 Dilution : 1.0000  
 Use Multiplier & Dilution Factor with ISTDs

Signal 1: MWD1 A. Sig=250.100 Ref=360.100

| Peak #   | RetTime [min] | Type | Width [min] | Area [mAU*s] | Height [mAU] | Area %  |
|----------|---------------|------|-------------|--------------|--------------|---------|
| 1        | 148.974       | PK   | 7.4108      | 1.63515e4    | 36.86395     | 50.4337 |
| 2        | 216.874       | PK   | 11.3478     | 1.61209e4    | 21.60274     | 49.5683 |
| Totals : |               |      |             | 3.25024e4    | 60.52669     |         |

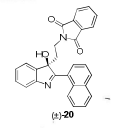

Signal 2: MWD1 B. Sig=254.16 Ref=360.100

| Peak #   | RetTime [min] | Type | Width [min] | Area [mAU*s] | Height [mAU] | Area %  |
|----------|---------------|------|-------------|--------------|--------------|---------|
| 1        | 148.938       | PK   | 7.4293      | 3349.87964   | 7.07585      | 50.2384 |
| 2        | 216.965       | PK   | 11.4595     | 3319.87974   | 4.53770      | 49.7616 |
| Totals : |               |      |             | 6269.85937   | 11.61355     |         |

Signal 3: MWD1 C. Sig=210.8 Ref=360.100

| Peak #   | RetTime [min] | Type | Width [min] | Area [mAU*s] | Height [mAU] | Area %  |
|----------|---------------|------|-------------|--------------|--------------|---------|
| 1        | 148.934       | PK   | 7.4173      | 4.79353e4    | 107.71022    | 50.2330 |
| 2        | 216.754       | PK   | 11.4414     | 4.74905e4    | 69.17962     | 49.7670 |
| Totals : |               |      |             | 9.54258e4    | 176.88984    |         |

Data File C:\CHEM2\1\DATA\FK\_3\_138\_4\DEF\_LC 2010-06-23 13-36-43\030-0101.D  
 Sample Name: FK-3-138

Acq. Operator : Filip  
 Acq. Instrument : Instrument 2  
 Injection Date : 6/23/2010 1:43:56 PM  
 Seq. Line : 1  
 Location : Vial 30  
 Inj Volume : 15 µl

Acq. Method : C:\Chem2\1\DATA\FK\_3\_138\_4\DEF\_LC 2010-06-23 13-36-43\FK-NPHTH-PHTH.M  
 Last changed : 6/22/2010 5:19:47 PM by Filip  
 Analysis Method : C:\CHEM2\1\DATA\FK\_3\_138\_4\DEF\_LC 2010-06-23 13-36-43\030-0101.D\DA.M (FK-NPHTH-PHTH.M)  
 Last changed : 6/22/2010 5:19:47 PM by Filip  
 Method Info : chiralcol.D

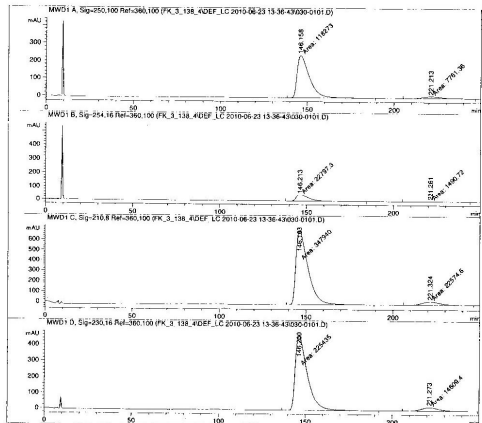

Data File C:\CHEM2\1\DATA\FK\_3\_138\_4\DEF\_LC 2010-06-23 13-36-43\030-0101.D  
 Sample Name: FK-3-138

MWD1 E. Sig=250.16 Ref=360.100 (FK\_3\_138\_4\DEF\_LC 2010-06-23 13-36-43\030-0101.D)

Area Percent Report

Sorted By : Signal  
 Multiplier : 1.0000  
 Dilution : 1.0000  
 Use Multiplier & Dilution Factor with ISTDs

Signal 1: MWD1 A. Sig=250.100 Ref=360.100

| Peak #   | RetTime [min] | Type | Width [min] | Area [mAU*s] | Height [mAU] | Area %  |
|----------|---------------|------|-------------|--------------|--------------|---------|
| 1        | 146.158       | PK   | 8.1471      | 1.18973e5    | 241.96290    | 93.8418 |
| 2        | 221.213       | PK   | 11.6939     | 7761.36377   | 11.00487     | 6.1582  |
| Totals : |               |      |             | 1.26036e5    | 253.01476    |         |

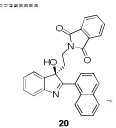

Signal 2: MWD1 B. Sig=254.16 Ref=360.100

| Peak #   | RetTime [min] | Type | Width [min] | Area [mAU*s] | Height [mAU] | Area %  |
|----------|---------------|------|-------------|--------------|--------------|---------|
| 1        | 146.213       | PK   | 8.0653      | 2.27973e4    | 47.10973     | 93.8623 |
| 2        | 221.261       | PK   | 11.6748     | 1490.72253   | 2.12813      | 6.1377  |
| Totals : |               |      |             | 2.42880e4    | 49.23785     |         |

Signal 3: MWD1 C. Sig=210.8 Ref=360.100

| Peak #   | RetTime [min] | Type | Width [min] | Area [mAU*s] | Height [mAU] | Area %  |
|----------|---------------|------|-------------|--------------|--------------|---------|
| 1        | 146.163       | PK   | 8.1080      | 3.47940e5    | 715.14539    | 93.8072 |
| 2        | 221.354       | PK   | 11.6944     | 2.25746e4    | 32.17287     | 6.0928  |
| Totals : |               |      |             | 3.70515e5    | 747.33826    |         |

Data File C:\CHEM32\DATA\FK\_3\_138\_5\DEF\_LC 2010-06-23 20-07-30\030-0101.D  
 Sample Name: FK-3-138 recrystallized

=====  
 Acq. Operator : Filip Seq. Line : 1  
 Acq. Instrument : Instrument 2 Location : Vial 10  
 Injection Date : 6/23/2010 8:14:32 PM Inj : 1  
 Inj Volume : 15 µl  
 Acq. Method : C:\Chem32\DATA\FK\_3\_138\_5\DEF\_LC 2010-06-23 20-07-30\FK-NPHTH-PHTH.M  
 Last changed : 6/22/2010 5:19:47 PM by Filip  
 Analysis Method : C:\CHEM32\DATA\FK\_3\_138\_5\DEF\_LC 2010-06-23 20-07-30\030-0101.D\DA.M (FK-NPHTH-PHTH.M)  
 Last changed : 6/22/2010 5:19:47 PM by Filip  
 Method Info : chemical CD

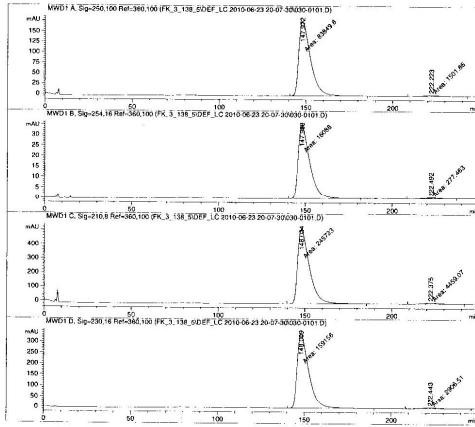

Data File C:\CHEM32\DATA\FK\_3\_138\_5\DEF\_LC 2010-06-23 20-07-30\030-0101.D  
 Sample Name: FK-3-138 recrystallized

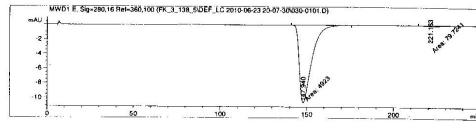

=====  
 Area Percent Report  
 =====  
 Sorted By : Signal  
 Multiplier : 1.0000  
 Dilution : 1.0000  
 Use Multiplier & Dilution Factor with 15TD6

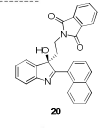

Signal 1: MMD1 A, Sig=250.100 Ref=360.100

| Peak #   | RetTime (min) | Type | Width (min) | Area (mAU*s) | Height (mAU) | Area %  |
|----------|---------------|------|-------------|--------------|--------------|---------|
| 1        | 147.972       | PK   | 7.7946      | 8.38498e4    | 179.28931    | 98.2404 |
| 2        | 222.223       | PK   | 10.8480     | 3501.85876   | 2.30743      | 1.7596  |
| Totals : |               |      |             | 8.53516e4    | 181.59673    |         |

Signal 2: MMD1 B, Sig=254.16 Ref=360.100

| Peak #   | RetTime (min) | Type | Width (min) | Area (mAU*s) | Height (mAU) | Area %  |
|----------|---------------|------|-------------|--------------|--------------|---------|
| 1        | 147.988       | PK   | 7.7823      | 1.60890e4    | 34.54107     | 98.3946 |
| 2        | 222.492       | PK   | 10.6765     | 277.46274    | 4.33120e-1   | 1.6954  |
| Totals : |               |      |             | 1.63654e4    | 34.97619     |         |

Signal 3: MMD1 C, Sig=210.8 Ref=360.100

| Peak #   | RetTime (min) | Type | Width (min) | Area (mAU*s) | Height (mAU) | Area %  |
|----------|---------------|------|-------------|--------------|--------------|---------|
| 1        | 148.034       | PK   | 7.7705      | 2.45723e5    | 527.04474    | 98.2173 |
| 2        | 222.375       | PK   | 11.1815     | 4459.07080   | 6.64647      | 1.7823  |
| Totals : |               |      |             | 2.50282e5    | 533.69121    |         |

98.5 : 1.5

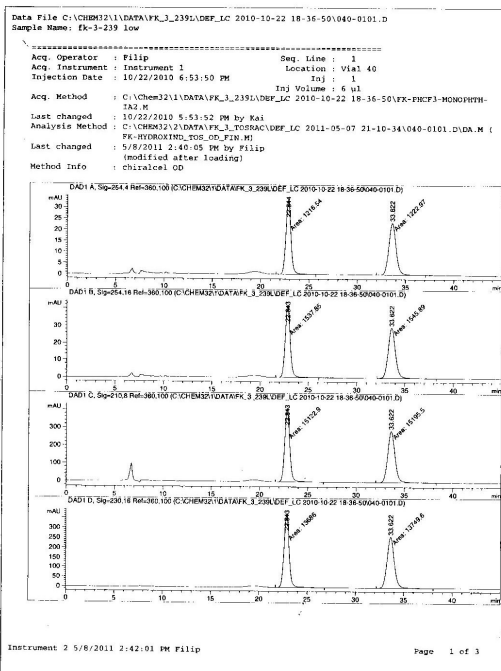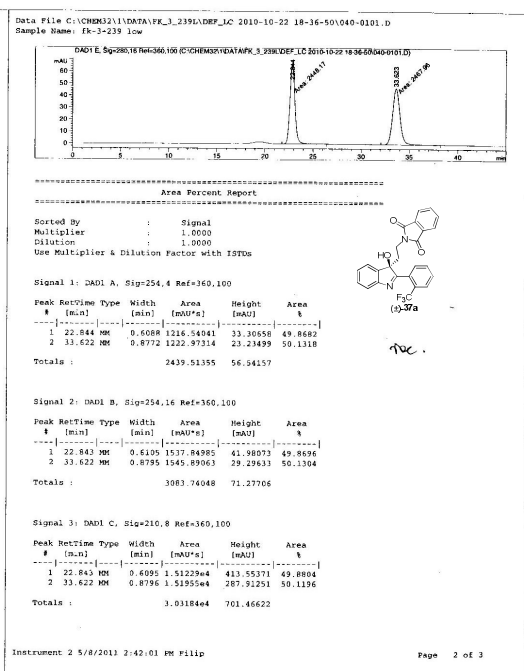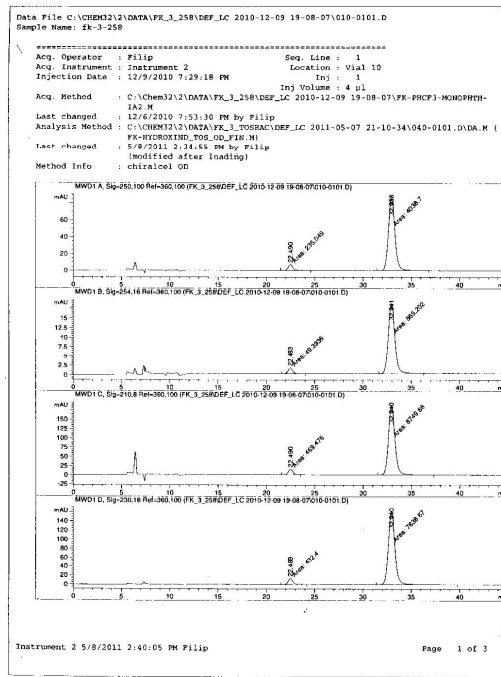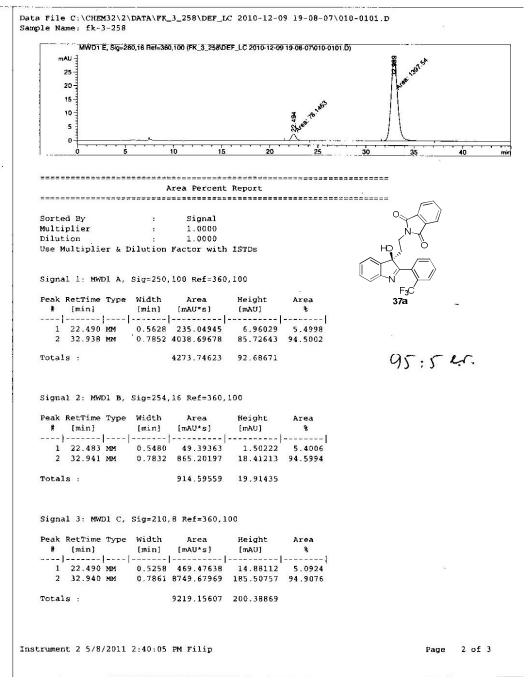

Data File C:\CHEM321\DATA\FK\_3\_250\DEF\_LC 2010-11-28 16:58-14\010-0101.D  
 Sample Name: FK-3-250

=====  
 Acq. Operator : Filip Seq. Line : 1  
 Acq. Instrument : Instrument 1 Location : Vial 10  
 Injection Date : 11/28/2010 5:15:20 PM Inj : 1  
 Inj Volume : 7 µl  
 Acq. Method : C:\Chem321\DATA\FK\_3\_250\DEF\_LC 2010-11-28 16:58-14\FK-PH-MONOPHTH-CON-H  
 Last changed : 11/28/2010 3:06:27 PM by Filip  
 Analysis Method : C:\CHEM321\METHODS\FK-MONOPHTH-CP1\_FCN.M  
 Last changed : 11/24/2010 4:34:13 PM by Filip  
 Method Info : chr1xal02-H

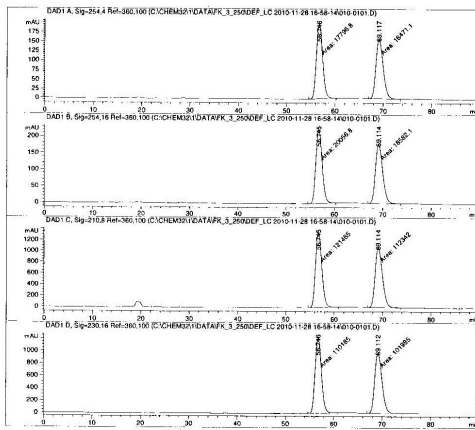

Instrument 1 11/29/2010 11:53:00 AM Filip

Page 1 of 3

Data File C:\CHEM321\DATA\FK\_3\_250\DEF\_LC 2010-11-28 16:58-14\010-0101.D  
 Sample Name: FK-3-250

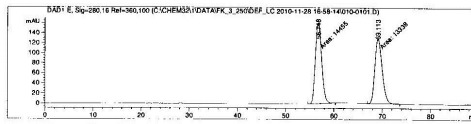

=====  
 Area Percent Report  
 =====  
 Sorted By : Signal  
 Multiplier : 1.0000  
 Dilution : 1.0000  
 Use Multiplier & Dilution Factor with ISTDs

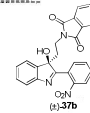

Signal 1: DAD1 A, Sig=254.4 Ref=360.100

| Peak #                       | RetTime [min] | Type | Width [min] | Area [mAU*s] | Height [mAU] | Area %  |
|------------------------------|---------------|------|-------------|--------------|--------------|---------|
| 1                            | 56.745        | HM   | 1.5021      | 1.77958e4    | 197.47076    | 51.9343 |
| 2                            | 69.117        | HM   | 1.7377      | 1.64711e4    | 157.98227    | 48.0657 |
| Totals : 3.42680e4 355.45303 |               |      |             |              |              |         |

Signal 2: DAD1 B, Sig=254.16 Ref=360.100

| Peak #                       | RetTime [min] | Type | Width [min] | Area [mAU*s] | Height [mAU] | Area %  |
|------------------------------|---------------|------|-------------|--------------|--------------|---------|
| 1                            | 56.745        | HM   | 1.5032      | 2.00560e4    | 222.38306    | 51.9083 |
| 2                            | 69.114        | HM   | 1.7398      | 1.81821e4    | 178.00981    | 48.0917 |
| Totals : 3.86390e4 400.39287 |               |      |             |              |              |         |

Signal 3: DAD1 C, Sig=210.8 Ref=360.100

| Peak #                        | RetTime [min] | Type | Width [min] | Area [mAU*s] | Height [mAU] | Area %  |
|-------------------------------|---------------|------|-------------|--------------|--------------|---------|
| 1                             | 56.745        | HM   | 1.5100      | 1.21465e5    | 1340.66772   | 51.9508 |
| 2                             | 69.114        | HM   | 1.7408      | 1.12342e5    | 1075.58105   | 48.0492 |
| Totals : 2.33807e5 2416.24878 |               |      |             |              |              |         |

Instrument 1 11/29/2010 11:53:00 AM Filip

Page 2 of 3

OD-H, 0.2 µl/min, 80 lux: 20 EtOH

Data File C:\CHEM321\DATA\FK\_3\_245\_247\DEF\_LC 2010-11-23 17:49-51\040-0301.D  
 Sample Name: FK-3-247 low

=====  
 Acq. Operator : Filip Seq. Line : 3  
 Acq. Instrument : Instrument 1 Location : Vial 40  
 Injection Date : 11/23/2010 10:35:13 PM Inj : 1  
 Inj Volume : 4 µl  
 Acq. Method : C:\Chem321\DATA\FK\_3\_245\_247\DEF\_LC 2010-11-23 17:49-51\FK-PH-MONOPHTH-CON-H  
 Last changed : 11/23/2010 5:28:14 PM by Filip  
 Analysis Method : C:\CHEM321\METHODS\FK-MONOPHTH-CP1\_FCN.M  
 Last changed : 11/22/2010 11:19:35 AM by Filip  
 Method Info : chr1xal02-H

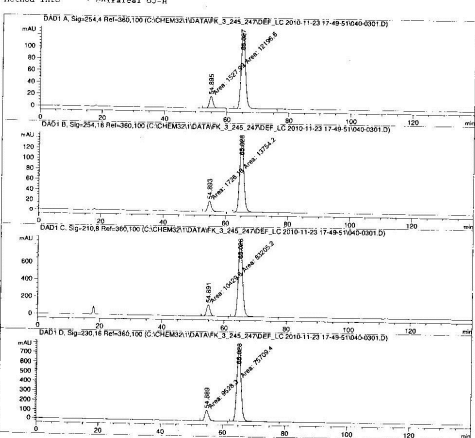

Instrument 1 11/24/2010 11:32:40 AM Filip

Page 1 of 3

Data File C:\CHEM321\DATA\FK\_3\_245\_247\DEF\_LC 2010-11-23 17:49-51\040-0301.D  
 Sample Name: FK-3-247 low

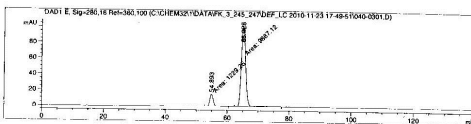

=====  
 Area Percent Report  
 =====  
 Sorted By : Signal  
 Multiplier : 1.0000  
 Dilution : 1.0000  
 Use Multiplier & Dilution Factor with ISTDs

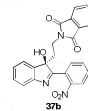

Signal 1: DAD1 A, Sig=254.4 Ref=360.100

| Peak #                       | RetTime [min] | Type | Width [min] | Area [mAU*s] | Height [mAU] | Area %  |
|------------------------------|---------------|------|-------------|--------------|--------------|---------|
| 1                            | 54.893        | HM   | 1.3062      | 1527.98547   | 19.49644     | 11.1332 |
| 2                            | 65.027        | HM   | 1.6030      | 1.21860e4    | 126.80947    | 88.8668 |
| Totals : 1.37246e4 146.30591 |               |      |             |              |              |         |

Signal 2: DAD1 B, Sig=254.16 Ref=360.100

| Peak #                       | RetTime [min] | Type | Width [min] | Area [mAU*s] | Height [mAU] | Area %  |
|------------------------------|---------------|------|-------------|--------------|--------------|---------|
| 1                            | 54.893        | HM   | 1.3052      | 1726.18286   | 21.97551     | 11.1508 |
| 2                            | 65.028        | HM   | 1.6048      | 1.37542e4    | 142.84019    | 88.8492 |
| Totals : 1.54803e4 164.81571 |               |      |             |              |              |         |

Signal 3: DAD1 C, Sig=210.8 Ref=360.100

| Peak #                       | RetTime [min] | Type | Width [min] | Area [mAU*s] | Height [mAU] | Area %  |
|------------------------------|---------------|------|-------------|--------------|--------------|---------|
| 1                            | 54.893        | HM   | 1.3102      | 1.04298e4    | 132.67923    | 11.1398 |
| 2                            | 65.028        | HM   | 1.6046      | 8.32352e4    | 864.25287    | 88.8612 |
| Totals : 9.36350e4 996.93210 |               |      |             |              |              |         |

Instrument 1 11/24/2010 11:32:40 AM Filip

Page 2 of 3

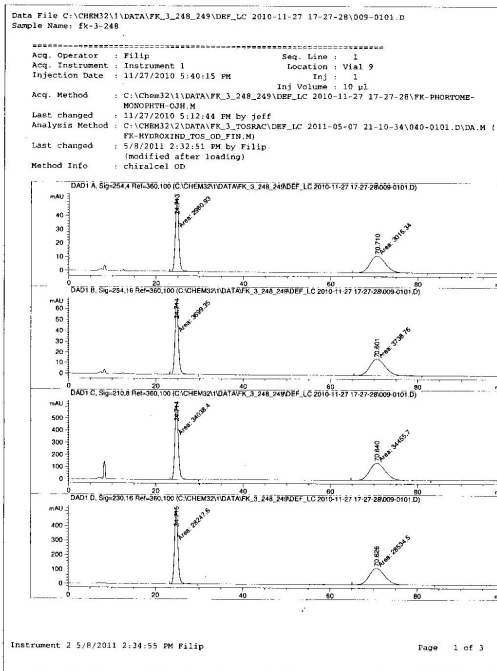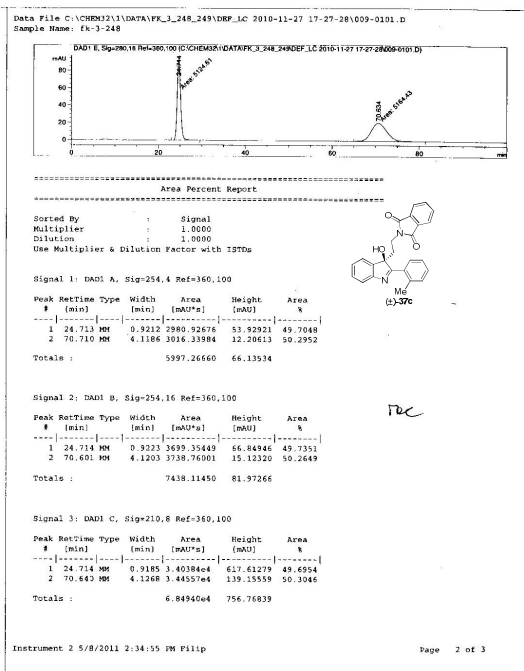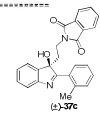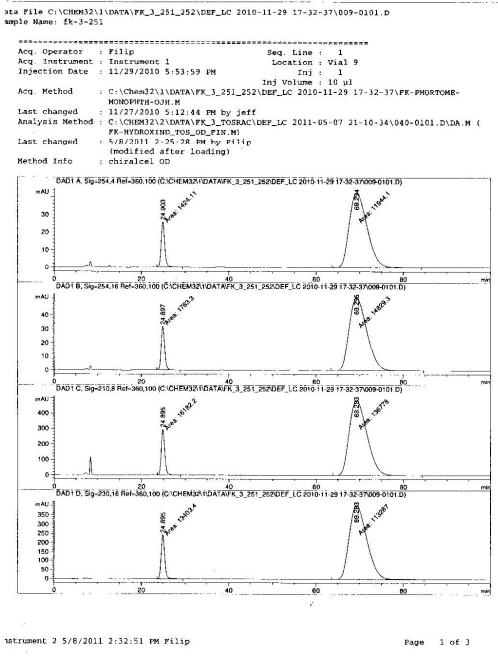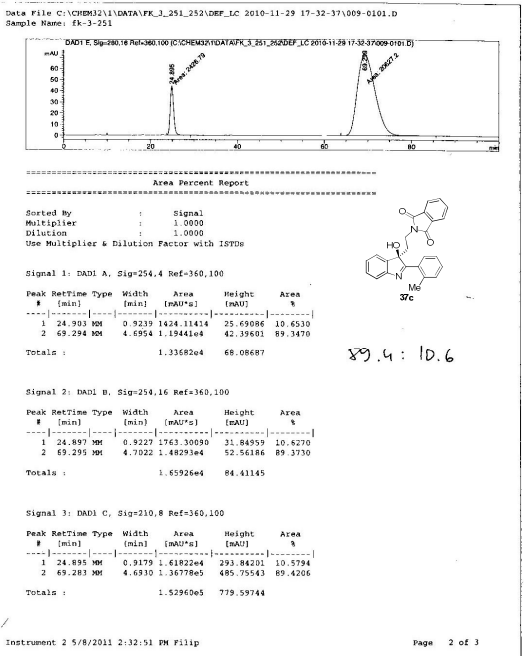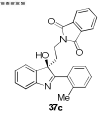

89.9 : 10.6

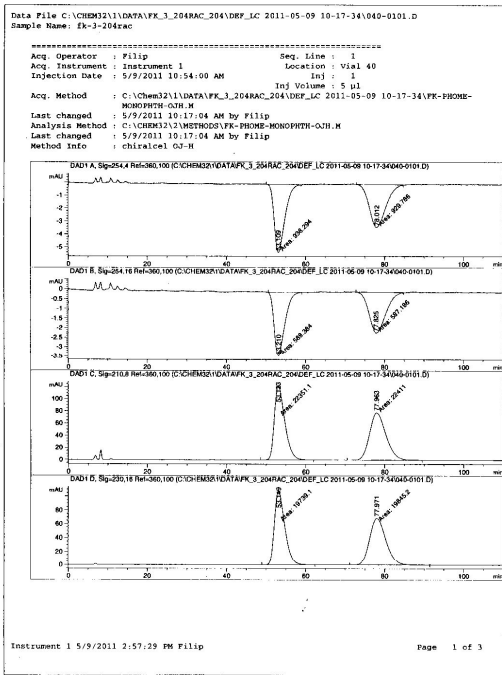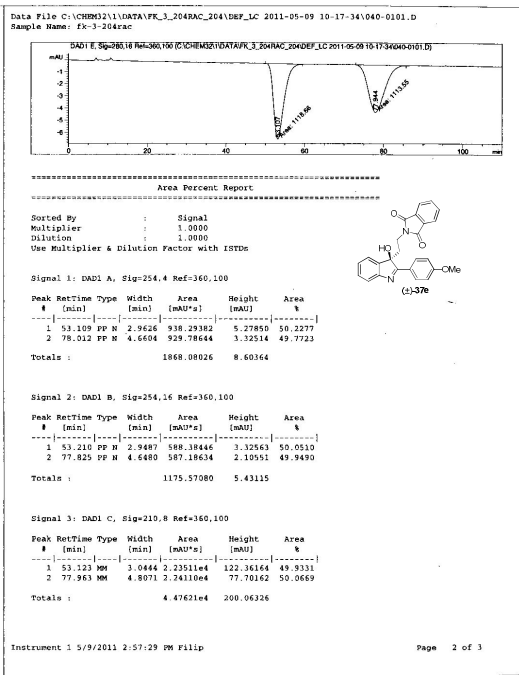

0.5-4, 0.5 mL/min, 75-25 Hex: EtOH

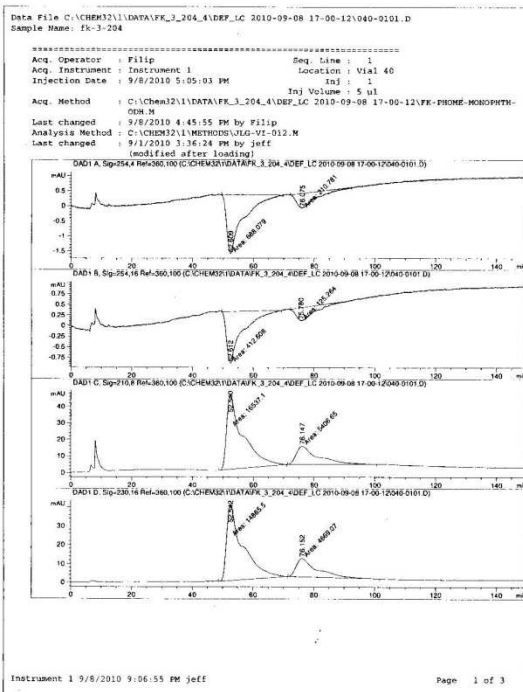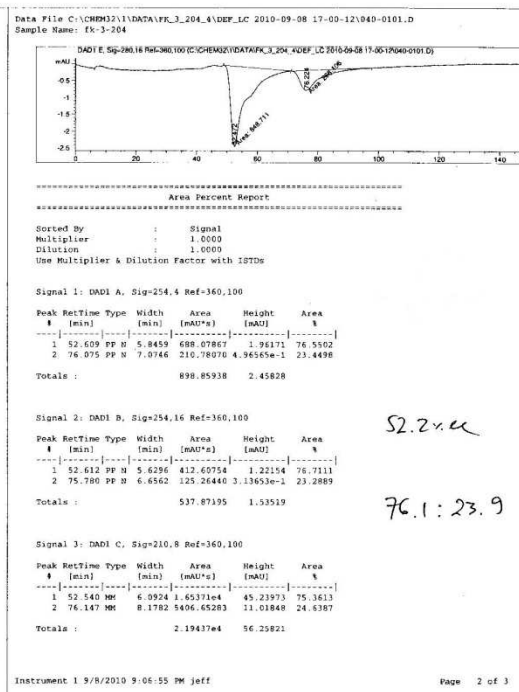

Data File C:\CHEM32\DATA\FK\_3\_205RACIA\DEF\_LC 2011-05-09 16-03-32\040-0101.D  
 Sample Name: FK-3-205rac

Acq. Operator : Filip Filip      Seq. Line : 1  
 Acq. Instrument : INSTRUMENT 2      Location : Vial 40  
 Injection Date : 5/9/2011 4:14:49 PM      Inj : 1  
 Inj Volume : 5 µl

Acq. Method : C:\Chem32\DATA\FK\_3\_205RACIA\DEF\_LC 2011-05-09 16-03-32\FK-PRCP3-MONOHPFH-COLSCR.M  
 Last changed : 5/9/2011 3:23:45 PM by Filip  
 Analysis Method : C:\CHEM32\DATA\FK\_3\_205RACIA\DEF\_LC 2011-05-09 16-03-32\040-0101.D\DA.M  
 (FK-PRCP3-MONOHPFH-COLSCR.M)  
 Last changed : 5/9/2011 3:23:45 PM by Filip  
 Method Info : chiralcol 1A

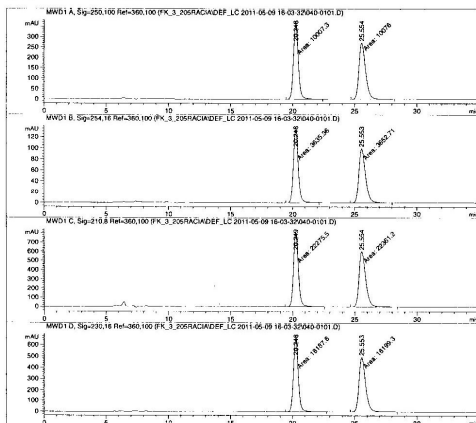

Instrument 2 5/10/2011 9:40:39 AM Filip      Page 1 of 3

Data File C:\CHEM32\DATA\FK\_3\_205RACIA\DEF\_LC 2011-05-09 16-03-32\040-0101.D  
 Sample Name: FK-3-205rac

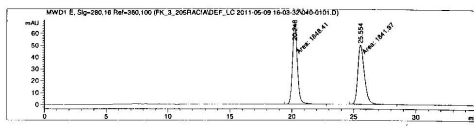

Area Percent Report

Sorted By : Signal  
 Multiplier : 1.0000  
 Dilution : 1.0000  
 Use Multiplier & Dilution Factor with ISTDs

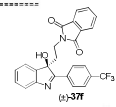

Signal 1: MWDI A, Sig=250.100 Ref=360.100

| Peak #                       | RetTime [min] | Type | Width [min] | Area [mAU*s] | Height [mAU] | Area %  |
|------------------------------|---------------|------|-------------|--------------|--------------|---------|
| 1                            | 20.248        | MM   | 0.4607      | 1.00073e4    | 362.00296    | 49.8291 |
| 2                            | 25.354        | MM   | 0.6202      | 1.0076e4     | 270.29772    | 50.1709 |
| Totals : 2.00833e4 632.76068 |               |      |             |              |              |         |

Signal 2: MWDI B, Sig=234.16 Ref=360.100

| Peak #                        | RetTime [min] | Type | Width [min] | Area [mAU*s] | Height [mAU] | Area %  |
|-------------------------------|---------------|------|-------------|--------------|--------------|---------|
| 1                             | 20.248        | MM   | 0.4557      | 3635.36108   | 132.95705    | 49.8810 |
| 2                             | 25.553        | MM   | 0.6158      | 3652.70874   | 98.86414     | 50.1190 |
| Totals : 7288.06982 231.82119 |               |      |             |              |              |         |

Signal 3: MWDI C, Sig=210.8 Ref=360.100

| Peak #                       | RetTime [min] | Type | Width [min] | Area [mAU*s] | Height [mAU] | Area %  |
|------------------------------|---------------|------|-------------|--------------|--------------|---------|
| 1                            | 20.248        | MM   | 0.4607      | 2.22755e4    | 805.84265    | 49.9041 |
| 2                            | 25.354        | MM   | 0.6381      | 2.2182e4     | 601.94212    | 50.0959 |
| Totals : 4.4637e4 1407.78497 |               |      |             |              |              |         |

Instrument 2 5/10/2011 9:40:39 AM Filip      Page 2 of 3

1A, 0.5 ml/min, 80:20 Hex:IPA

Data File C:\CHEM32\DATA\FK\_3\_205IA\DEF\_LC 2011-05-09 18-01-25\040-0101.D  
 Sample Name: FK-3-205

Acq. Operator : Filip Filip      Seq. Line : 1  
 Acq. Instrument : INSTRUMENT 2      Location : Vial 40  
 Injection Date : 5/9/2011 7:12:38 PM      Inj : 1  
 Inj Volume : 3 µl

Acq. Method : C:\Chem32\DATA\FK\_3\_205IA\DEF\_LC 2011-05-09 18-01-25\FK-PRCP3-MONOHPFH-COLSCR.M  
 Last changed : 5/9/2011 6:00:16 PM by Filip  
 Analysis Method : C:\CHEM32\DATA\FK\_3\_205IA\DEF\_LC 2011-05-09 18-01-25\040-0101.D\DA.M (FK-PRCP3-MONOHPFH-COLSCR.M)  
 Last changed : 5/9/2011 6:00:16 PM by Filip  
 Method Info : chiralcol 1A

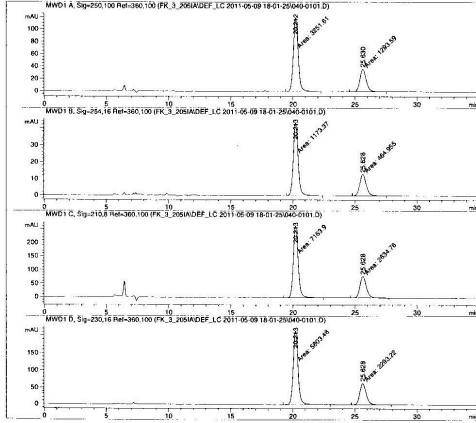

Instrument 2 5/10/2011 9:38:52 AM Filip      Page 1 of 3

Data File C:\CHEM32\DATA\FK\_3\_205IA\DEF\_LC 2011-05-09 18-01-25\040-0101.D  
 Sample Name: FK-3-205

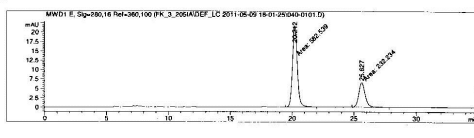

Area Percent Report

Sorted By : Signal  
 Multiplier : 1.0000  
 Dilution : 1.0000  
 Use Multiplier & Dilution Factor with ISTDs

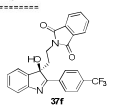

Signal 1: MWDI A, Sig=250.100 Ref=360.100

| Peak #                        | RetTime [min] | Type | Width [min] | Area [mAU*s] | Height [mAU] | Area %  |
|-------------------------------|---------------|------|-------------|--------------|--------------|---------|
| 1                             | 20.212        | MM   | 0.4532      | 1251.61450   | 119.57166    | 71.5395 |
| 2                             | 25.630        | MM   | 0.5957      | 1293.58972   | 36.19318     | 28.4605 |
| Totals : 4545.20422 155.76284 |               |      |             |              |              |         |

Signal 2: MWDI B, Sig=254.16 Ref=360.100

| Peak #                       | RetTime [min] | Type | Width [min] | Area [mAU*s] | Height [mAU] | Area %  |
|------------------------------|---------------|------|-------------|--------------|--------------|---------|
| 1                            | 20.212        | MM   | 0.4526      | 1173.36516   | 43.20894     | 71.6200 |
| 2                            | 25.628        | MM   | 0.5931      | 464.99477    | 23.05622     | 28.3800 |
| Totals : 1638.32013 56.27516 |               |      |             |              |              |         |

Signal 3: MWDI C, Sig=210.8 Ref=360.100

| Peak #                        | RetTime [min] | Type | Width [min] | Area [mAU*s] | Height [mAU] | Area %  |
|-------------------------------|---------------|------|-------------|--------------|--------------|---------|
| 1                             | 20.212        | MM   | 0.4527      | 7163.90234   | 263.74695    | 71.6486 |
| 2                             | 25.628        | MM   | 0.5936      | 2834.75854   | 79.59386     | 28.3514 |
| Totals : 9998.66089 343.34081 |               |      |             |              |              |         |

Instrument 2 5/10/2011 9:38:52 AM Filip      Page 2 of 3



Data File C:\CHEM32\1\DATA\FK\_3\_235\DEF\_IC 2010-10-20 17:55-03\040-0101.D  
 Sample Name: FK-3-235 low

Acq. Operator : Filip Seq. Line : 1  
 Acq. Instrument : Instrument 1 Location : Vial 40  
 Injection Date : 10/20/2010 5:58:34 PM Inj. Inj : 1  
 Inj. Volume : 5 µl  
 Acq. Method : C:\Chem32\1\DATA\FK\_3\_235\DEF\_IC 2010-10-20 17:55-03\FK-ANTRAC-PHTR.M  
 Last changed : 10/20/2010 4:48:10 PM by Filip  
 Analysis Method : C:\CHEM32\1\DATA\FK\_3\_235\DEF\_IC 2011-05-07 21-10-34\040-0101.D\DA.M (FK-HYDROXIND\_TOS\_OD\_FIN.M)  
 Last changed : 5/8/2011 2:23:37 PM by Filip (modified after loading)  
 Method Info : chiralcol OD

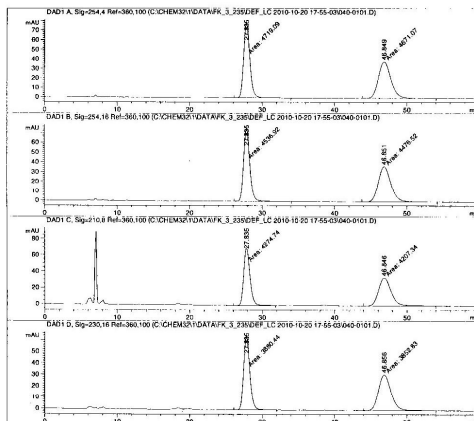

Instrument 2 5/8/2011 2:25:28 PM Filip

Page 1 of 3

Data File C:\CHEM32\1\DATA\FK\_3\_235\DEF\_IC 2010-10-20 17:55-03\040-0101.D  
 Sample Name: FK-3-235 low

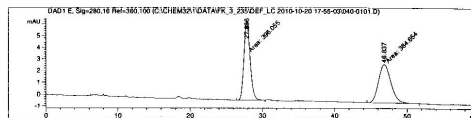

Area Percent Report

Sorted By : Signal  
 Multiplier : 1.0000  
 Dilution : 1.0000  
 Use Multiplier & Dilution Factor with ISTDs

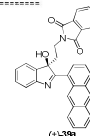

Signal 1: DAD1 A, Sig=254.4 Ref=360,100

| Peak #   | RetTime [min] | Type | Width [min] | Area [mAU*s] | Height [mAU] | Area %  |
|----------|---------------|------|-------------|--------------|--------------|---------|
| 1        | 27.835        | PK   | 1.0056      | 4719.09473   | 78.21732     | 50.2557 |
| 2        | 46.849        | PK   | 2.0232      | 4671.06787   | 38.49893     | 49.7483 |
| Totals : |               |      |             | 9390.16260   | 116.71626    |         |

Signal 2: DAD1 B, Sig=254.16 Ref=360,100

| Peak #   | RetTime [min] | Type | Width [min] | Area [mAU*s] | Height [mAU] | Area %  |
|----------|---------------|------|-------------|--------------|--------------|---------|
| 1        | 27.835        | PK   | 1.0084      | 4536.92334   | 74.98431     | 50.3351 |
| 2        | 46.851        | PK   | 2.0226      | 4476.51855   | 36.88670     | 49.6649 |
| Totals : |               |      |             | 9013.44189   | 111.87102    |         |

Signal 3: DAD1 C, Sig=210.8 Ref=360,100

| Peak #   | RetTime [min] | Type | Width [min] | Area [mAU*s] | Height [mAU] | Area %  |
|----------|---------------|------|-------------|--------------|--------------|---------|
| 1        | 27.835        | PK   | 1.0118      | 4274.73975   | 70.27375     | 50.3973 |
| 2        | 46.846        | PK   | 2.0458      | 4207.34033   | 34.27620     | 49.6027 |
| Totals : |               |      |             | 8482.08008   | 104.54955    |         |

Instrument 2 5/8/2011 2:25:28 PM Filip

Page 2 of 3

Data File C:\CHEM32\1\DATA\FK\_3\_241\DEF\_IC 2010-11-15 10:17:50\039-0101.D  
 Sample Name: FK-3-241 low all

Acq. Operator : Filip Seq. Line : 1  
 Acq. Instrument : Instrument 1 Location : Vial 39  
 Injection Date : 11/15/2010 10:29:57 AM Inj. Inj : 1  
 Inj. Volume : 10 µl  
 Acq. Method : C:\Chem32\1\DATA\FK\_3\_241\DEF\_IC 2010-11-15 10-17-50\FK-ANTRAC-PHTR.M  
 Last changed : 11/15/2010 10:06:09 AM by Filip  
 Analysis Method : C:\CHEM32\1\DATA\FK\_3\_241\DEF\_IC 2011-05-07 21-10-34\040-0101.D\DA.M (FK-HYDROXIND\_TOS\_OD\_FIN.M)  
 Last changed : 5/8/2011 2:20:45 PM by Filip (modified after loading)  
 Method Info : chiralcol OD

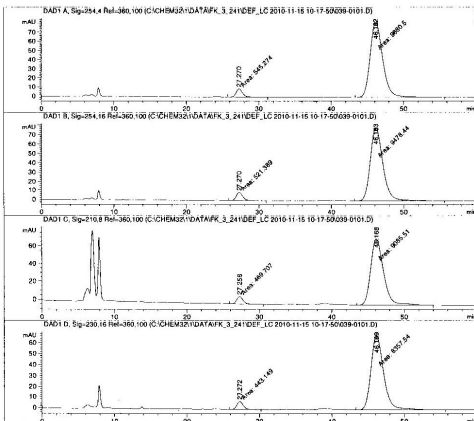

Instrument 2 5/8/2011 2:23:36 PM Filip

Data File C:\CHEM32\1\DATA\FK\_3\_241\DEF\_IC 2010-11-15 10:17:50\039-0101.D  
 Sample Name: FK-3-241 low all

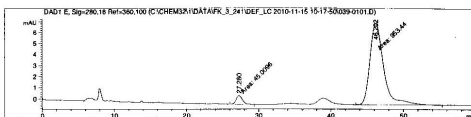

Area Percent Report

Sorted By : Signal  
 Multiplier : 1.0000  
 Dilution : 1.0000  
 Use Multiplier & Dilution Factor with ISTDs

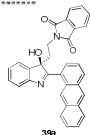

Signal 1: DAD1 A, Sig=254.4 Ref=360,100

| Peak #   | RetTime [min] | Type | Width [min] | Area [mAU*s] | Height [mAU] | Area %  |
|----------|---------------|------|-------------|--------------|--------------|---------|
| 1        | 27.270        | PK   | 1.0170      | 545.27380    | 8.93626      | 5.2301  |
| 2        | 46.162        | PK   | 2.0001      | 9880.49805   | 82.33318     | 94.7699 |
| Totals : |               |      |             | 1.0425864    | 91.26945     |         |

Signal 2: DAD1 B, Sig=254.16 Ref=360,100

| Peak #   | RetTime [min] | Type | Width [min] | Area [mAU*s] | Height [mAU] | Area %  |
|----------|---------------|------|-------------|--------------|--------------|---------|
| 1        | 27.270        | PK   | 1.0155      | 521.98979    | 8.35710      | 5.2140  |
| 2        | 46.163        | PK   | 2.0020      | 9478.44434   | 78.50980     | 94.7860 |
| Totals : |               |      |             | 999.83313    | 87.46690     |         |

Signal 3: DAD1 C, Sig=210.8 Ref=360,100

| Peak #   | RetTime [min] | Type | Width [min] | Area [mAU*s] | Height [mAU] | Area %  |
|----------|---------------|------|-------------|--------------|--------------|---------|
| 1        | 27.258        | PK   | 0.9941      | 469.70676    | 7.87520      | 4.9157  |
| 2        | 46.168        | PK   | 2.0382      | 9085.51455   | 74.29472     | 95.0843 |
| Totals : |               |      |             | 955.22141    | 82.16991     |         |

Instrument 2 5/8/2011 2:23:36 PM Filip

Page 2 of 3

Data File C:\CHEM32\1\DATA\FK\_3\_241\DEF\_LC 2010-11-15 10-17-50\040-0201.D  
 Sample Name: FK-3-241 low cryst

Acq. Operator : Filip Filip      Seq. Line : 2  
 Acq. Instrument : Instrument 1      Location : Vial 40  
 Injection Date : 11/25/2010 11:51:24 AM      Inj 1  
 Inj Volume : 10 µl  
 Acq. Method : C:\Chem32\1\DATA\FK\_3\_241\DEF\_LC 2010-11-15 10-17-50\FK-ANTRAC-PRTH.M  
 Last changed : 11/25/2010 10:05:09 AM by Filip  
 Analysis Method : C:\CHEM32\1\DATA\FK\_3\_241\DEF\_LC 2011-05-07 21-10-34\040-0101.D\DA.M (FK-HYDROXIND\_T05\_OD\_FIN.M)  
 Last changed : 5/8/2011 2:11:45 PM by Filip (modified after loading)  
 Method Info : chiralcel OD

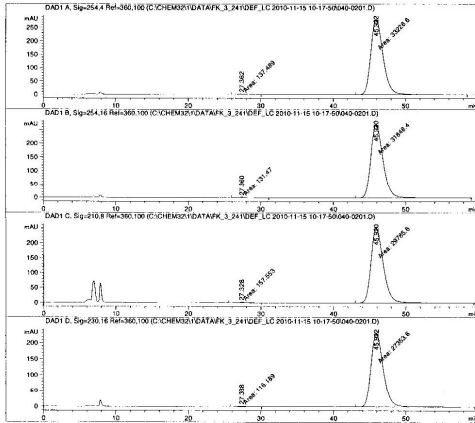

Data File C:\CHEM32\1\DATA\FK\_3\_241\DEF\_LC 2010-11-15 10-17-50\040-0201.D  
 Sample Name: FK-3-241 low cryst

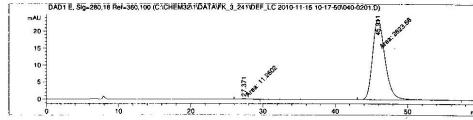

Area Percent Report

Sorted By : Signal  
 Multiplier : 1.0000  
 Dilution : 1.0000  
 Use Multiplier & Dilution Factor with ISTDs

Signal 1: DAD1 A, Sig=254.4 Ref=360,100

| Peak #  | RetTime [min] | Type | Width [min] | Area [mAU*s] | Height [mAU] | Area %  |
|---------|---------------|------|-------------|--------------|--------------|---------|
| 1       | 27.362        | NM   | 1.0812      | 137.48908    | 2.11930      | 0.4121  |
| 2       | 45.922        | NM   | 1.9638      | 3.3236e4     | 282.04535    | 99.5879 |
| Totals: |               |      |             | 3.33661e4    | 284.16465    |         |

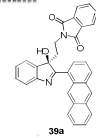

Signal 2: DAD1 B, Sig=254.16 Ref=360,100

| Peak #  | RetTime [min] | Type | Width [min] | Area [mAU*s] | Height [mAU] | Area %  |
|---------|---------------|------|-------------|--------------|--------------|---------|
| 1       | 27.360        | NM   | 1.0809      | 131.47032    | 2.02712      | 0.4111  |
| 2       | 45.920        | NM   | 1.9651      | 3.18484e4    | 270.18004    | 99.5889 |
| Totals: |               |      |             | 3.19799e4    | 272.14516    |         |

99.6:0.4

Signal 3: DAD1 C, Sig=210.8 Ref=360,100

| Peak #  | RetTime [min] | Type | Width [min] | Area [mAU*s] | Height [mAU] | Area %  |
|---------|---------------|------|-------------|--------------|--------------|---------|
| 1       | 27.328        | NM   | 1.2821      | 157.55267    | 2.04815      | 0.5262  |
| 2       | 45.920        | NM   | 1.9688      | 2.9785e4     | 252.15018    | 99.4738 |
| Totals: |               |      |             | 2.99431e4    | 254.19632    |         |

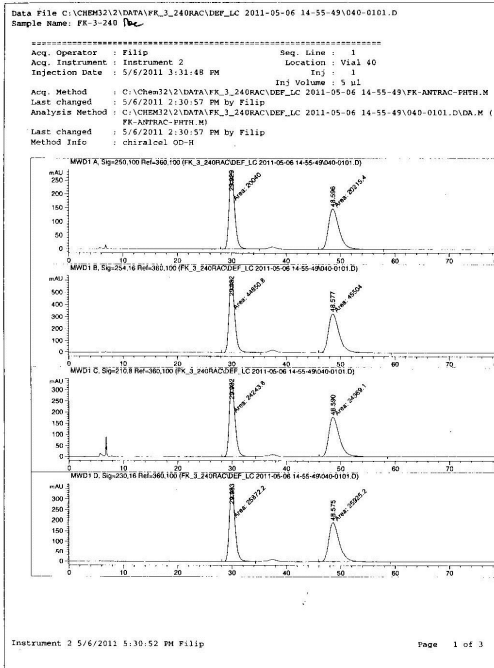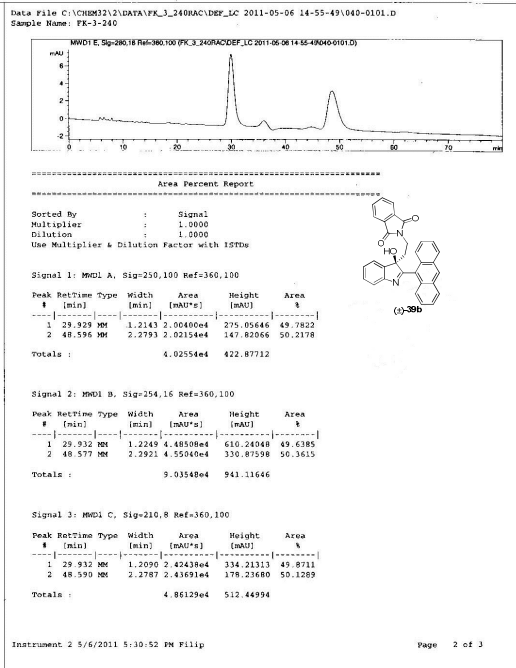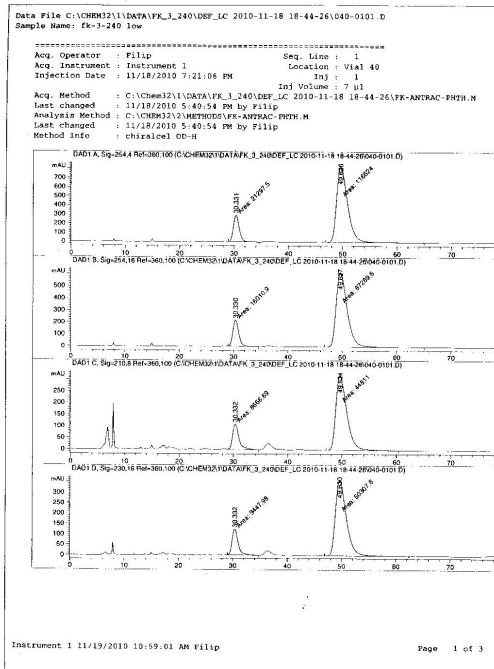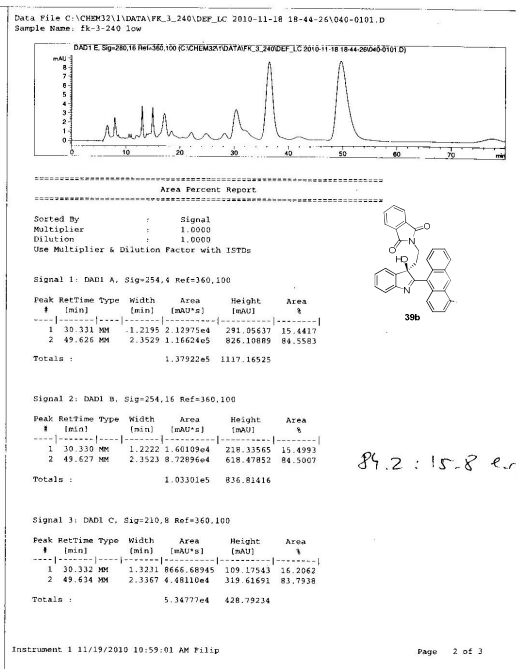

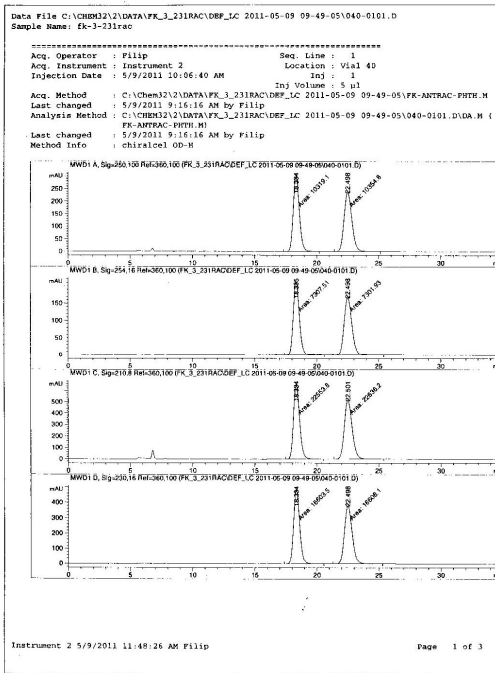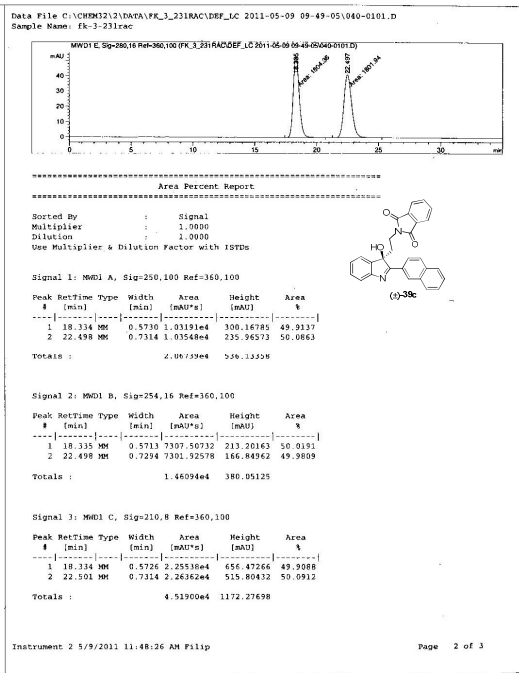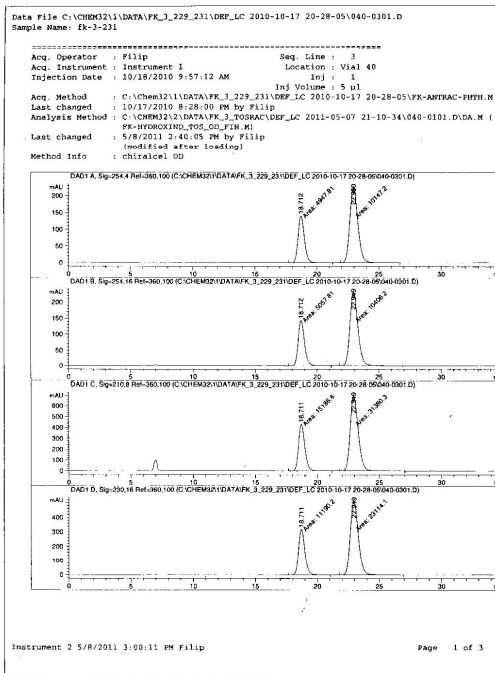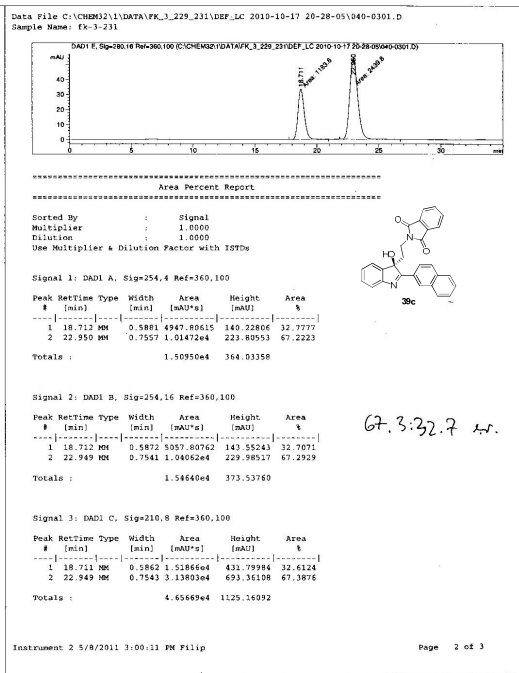

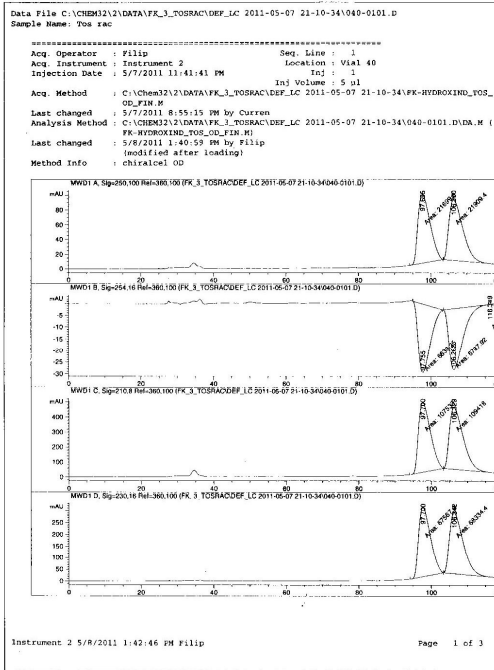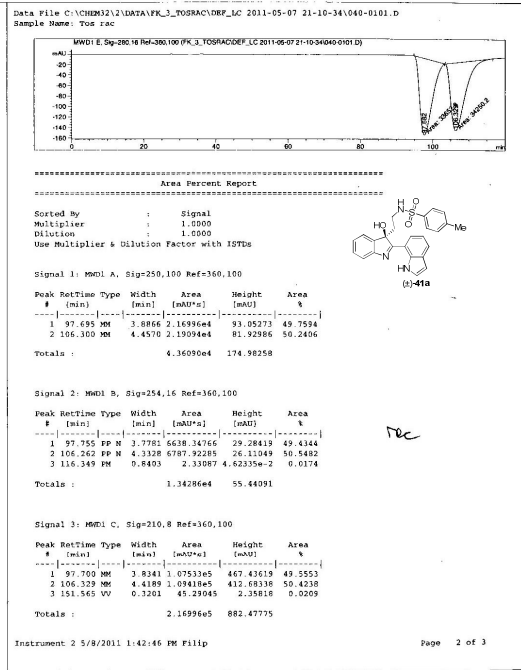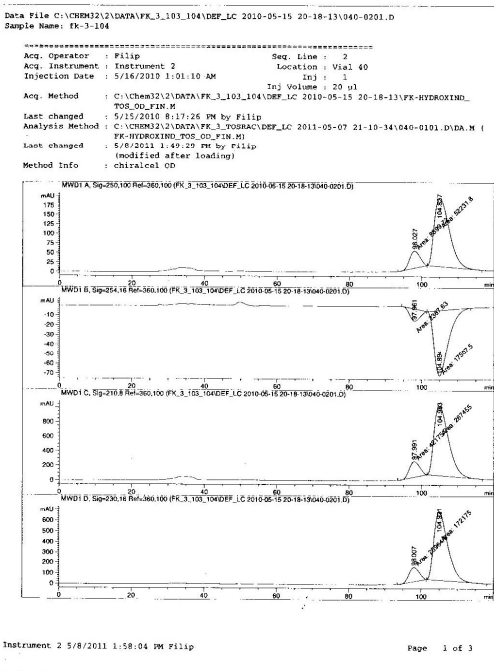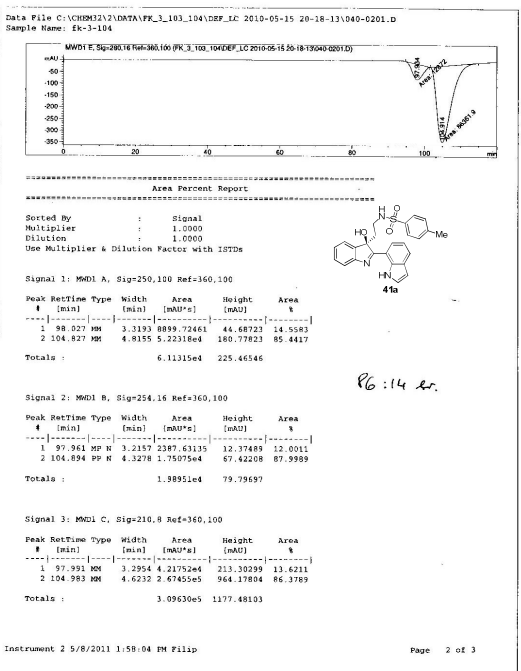

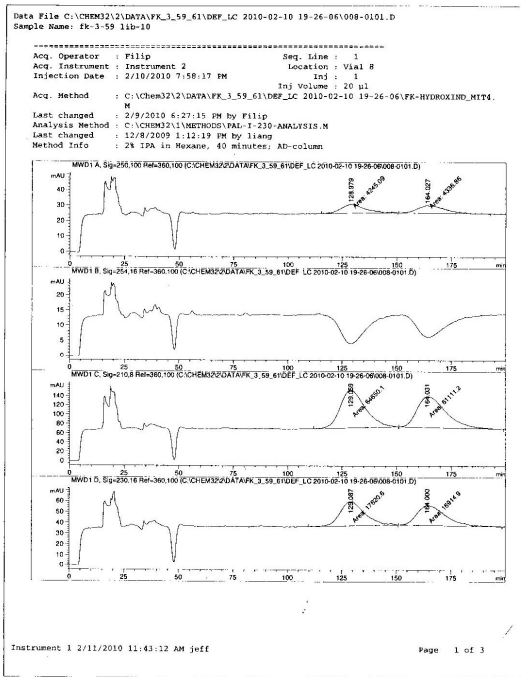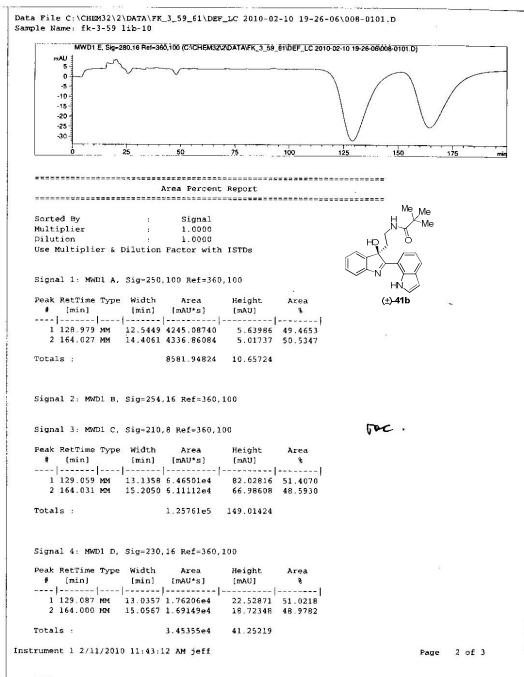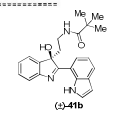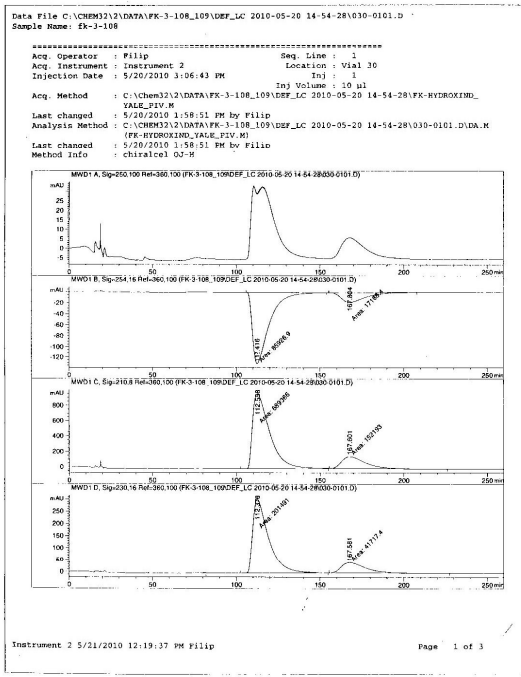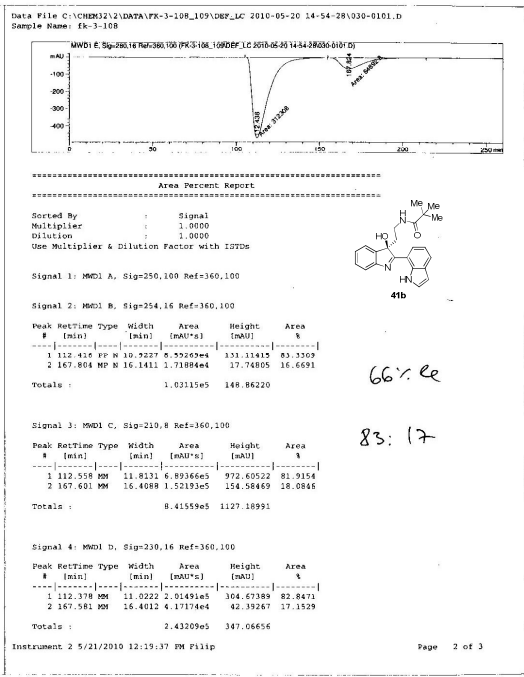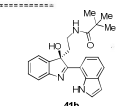

66% ee  
83:17

Data File C:\CHEM32\2\DATA\FK\_PHTHBI\_RAC\DEF\_IC 2011-05-08 15:57-19\040-0101.D  
 Sample Name: Phtb rac

Acq. Operator : Filip Sep. Line : 1  
 Acq. Instrument : Instrument 2 Location : Vial 40  
 Injection Date : 5/8/2011 4:01:39 PM Inj : 1  
 Inj Volume : 10 µl  
 Acq. Method : C:\Chem32\2\DATA\FK\_PHTHBI\_RAC\DEF\_IC 2011-05-08 15:57-19\FK-MONO-PHTHBI-ODH.M  
 Last changed : 5/8/2011 3:10:27 PM by Filip  
 Analysis Method : C:\CHEM32\2\DATA\FK\_PHTHBI\_RAC\DEF\_IC 2011-05-08 15:57-19\040-0101.D\DA.M  
 (FK-MONO-PHTHBI-ODH.M)  
 Last changed : 5/8/2011 3:10:27 PM by Filip  
 Method Info : chiralcel OD-H

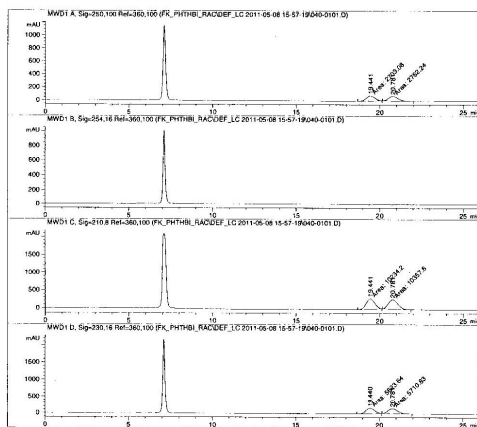

Instrument 2 5/8/2011 4:41:41 PM Filip

Page 1 of 3

Data File C:\CHEM32\2\DATA\FK\_PHTHBI\_RAC\DEF\_IC 2011-05-08 15:57-19\040-0101.D  
 Sample Name: Phtb rac

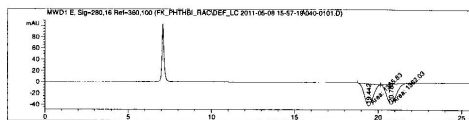

Area Percent Report

Sorted By : Signal  
 Multiplier : 1.0000  
 Dilution : 1.0000  
 Use Multiplier & Dilution Factor with ISTDs

Signal 1: MWD1 A, Sig=250.100 Ref=360.100

| Peak # | RetTime [min] | Type | Width [min] | Area [mAU*s] | Height [mAU] | Area %  |
|--------|---------------|------|-------------|--------------|--------------|---------|
| 1      | 19.441        | MM   | 0.5919      | 2703.07861   | 76.10938     | 49.4587 |
| 2      | 20.781        | MM   | 0.6558      | 2762.24292   | 70.19650     | 50.5413 |

Totals : 5465.32153 146.30585

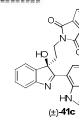

Signal 2: MWD1 B, Sig=254.16 Ref=360.100

Signal 3: MWD1 C, Sig=210.8 Ref=360.100

| Peak # | RetTime [min] | Type | Width [min] | Area [mAU*s] | Height [mAU] | Area %  |
|--------|---------------|------|-------------|--------------|--------------|---------|
| 1      | 19.441        | MM   | 0.5894      | 1.02342e4    | 289.41443    | 49.7002 |
| 2      | 20.781        | MM   | 0.6518      | 1.03776e4    | 264.85392    | 50.2998 |

Totals : 2.05918e4 554.26925

Signal 4: MWD1 D, Sig=230.16 Ref=360.100

| Peak # | RetTime [min] | Type | Width [min] | Area [mAU*s] | Height [mAU] | Area %  |
|--------|---------------|------|-------------|--------------|--------------|---------|
| 1      | 19.440        | MM   | 0.5880      | 5623.64111   | 159.39807    | 49.6154 |
| 2      | 20.781        | MM   | 0.6514      | 5710.82813   | 146.11992    | 50.3846 |

Totals : 1.13345e4 305.51799

Instrument 2 5/8/2011 4:41:41 PM Filip

rac

4c

Data File C:\CHEM32\2\DATA\FK\_3\_185\DEF\_IC 2010-08-15 18:54-34\060-0101.D  
 Sample Name: FK-3-185

Acq. Operator : Filip Sep. Line : 1  
 Acq. Instrument : Instrument 2 Location : Vial 60  
 Injection Date : 8/15/2010 7:25:38 PM Inj : 1  
 Inj Volume : 3 µl  
 Acq. Method : C:\CHEM32\2\DATA\FK\_3\_185\DEF\_IC 2010-08-15 18:54-34\FK-MONO-PHTHBI-ODH.M  
 Last changed : 8/15/2010 6:53:38 PM by Filip  
 Analysis Method : C:\CHEM32\2\DATA\FK\_3\_185\DEF\_IC 2010-08-15 18:54-34\040-0101.D\DA.M (FK-HYDROXIND\_TOS\_ODH.M)  
 Last changed : 5/8/2011 1:58:14 PM by Filip  
 (modified after loading)  
 Method Info : chiralcel OD

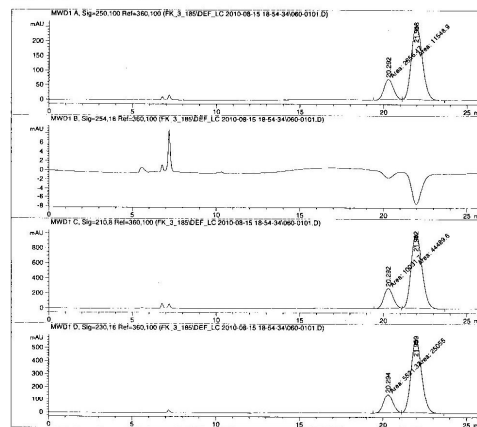

Instrument 2 5/8/2011 2:11:45 PM Filip

Page 1 of 3

Data File C:\CHEM32\2\DATA\FK\_3\_185\DEF\_IC 2010-08-15 18:54-34\060-0101.D  
 Sample Name: FK-3-185

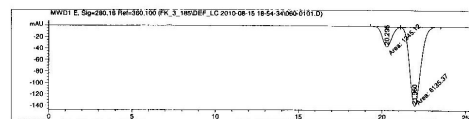

Area Percent Report

Sorted By : Signal  
 Multiplier : 1.0000  
 Dilution : 1.0000  
 Use Multiplier & Dilution Factor with ISTDs

Signal 1: MWD1 A, Sig=250.100 Ref=360.100

| Peak # | RetTime [min] | Type | Width [min] | Area [mAU*s] | Height [mAU] | Area %  |
|--------|---------------|------|-------------|--------------|--------------|---------|
| 1      | 20.292        | MM   | 0.6420      | 2656.40729   | 68.94424     | 18.7005 |
| 2      | 21.958        | MM   | 0.7622      | 1.15489e4    | 252.54510    | 81.2995 |

Totals : 1.42053e4 321.50935

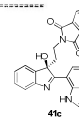

Signal 2: MWD1 B, Sig=254.16 Ref=360.100

Signal 3: MWD1 C, Sig=210.8 Ref=360.100

| Peak # | RetTime [min] | Type | Width [min] | Area [mAU*s] | Height [mAU] | Area %  |
|--------|---------------|------|-------------|--------------|--------------|---------|
| 1      | 20.292        | MM   | 0.6398      | 1.00317e4    | 261.54788    | 18.3986 |
| 2      | 21.962        | MM   | 0.7580      | 4.44896e4    | 978.21533    | 81.6014 |

Totals : 5.45213e4 1239.76321

Signal 4: MWD1 D, Sig=230.16 Ref=360.100

| Peak # | RetTime [min] | Type | Width [min] | Area [mAU*s] | Height [mAU] | Area %  |
|--------|---------------|------|-------------|--------------|--------------|---------|
| 1      | 20.294        | MM   | 0.6388      | 5211.32520   | 144.05894    | 18.0574 |
| 2      | 21.959        | MM   | 0.7404      | 2.50550e4    | 563.99811    | 81.9425 |

Totals : 3.05763e4 708.05705

Instrument 2 5/8/2011 2:11:45 PM Filip

82.2 : 17.8

Page 2 of 3

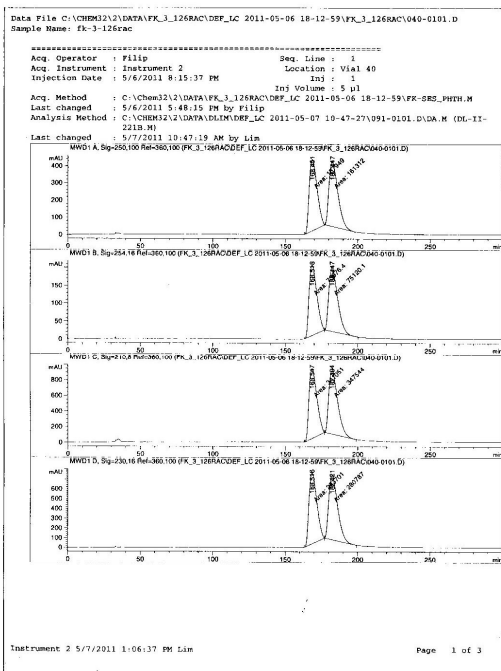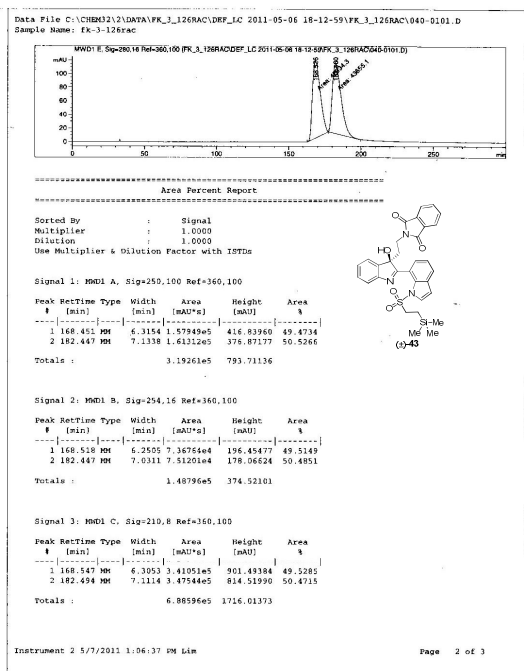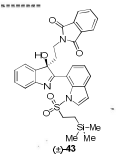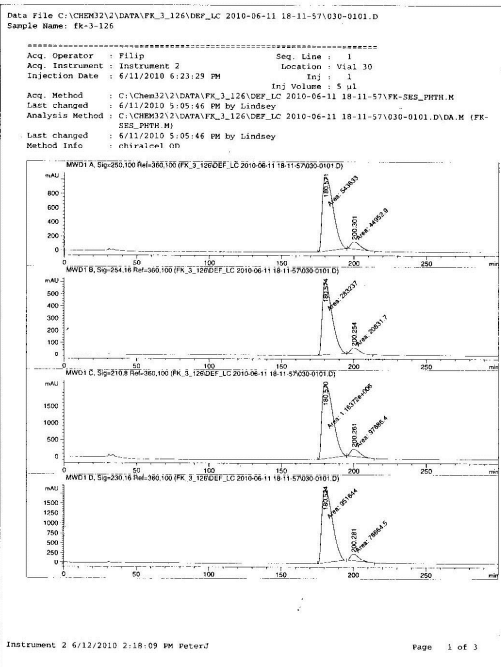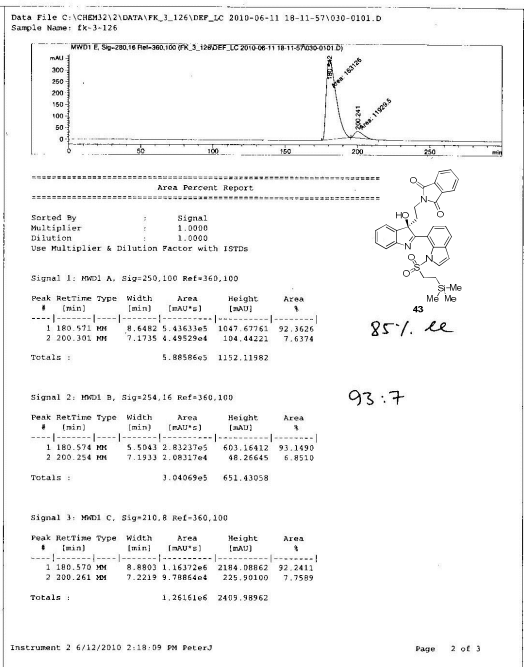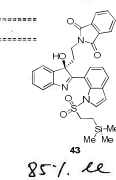

93:7



Data File C:\CHEM32\1\DATA\FK\_3\_302\_303\_OJH\DEF\_LC 2011-05-12 20:45:49\040-0101.D  
 Sample Name: FK-3-302

\*\*\*\*\*  
 Acq. Operator : Filip Seq. Line : 1  
 Acq. Instrument : Instrument 2 Location : Vial 40  
 Injection Date : 5/12/2011 9:57:24 PM Inj : 1  
 Inj Volume : 6 ul  
 Acq. Method : C:\Chem32\1\DATA\FK\_3\_302\_303\_OJH\DEF\_LC 2011-05-12 20:45:49\FK-  
 NAFFTYLEBARANO.M  
 Last changed : 5/12/2011 8:00:23 PM by Filip  
 Analysis Method : C:\CHEM32\1\DATA\FK\_3\_302\_303\_OJH\DEF\_LC 2011-05-12 20:45:49\040-0101.D\  
 DA.M (FK-NAFFTYLEBARANO.M)  
 Last changed : 5/12/2011 8:00:23 PM by Filip  
 Method Info : chiralcol OJ-H

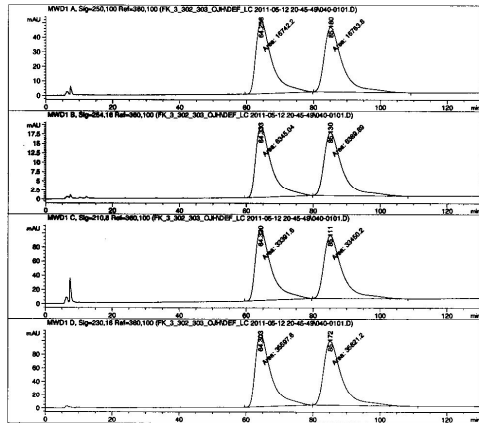

Data File C:\CHEM32\1\DATA\FK\_3\_302\_303\_OJH\DEF\_LC 2011-05-12 20:45:49\040-0101.D  
 Sample Name: FK-3-302

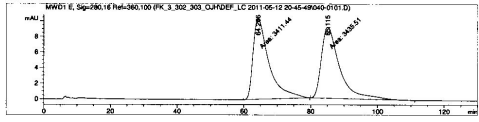

Area Percent Report

Sorted By : Signal  
 Multiplier : 1.0000  
 Dilution : 1.0000  
 Use Multiplier & Dilution Factor with %TMS

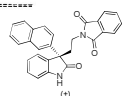

Signal 1: MWD1 A, Sig=250.100 Ref=360.100

| Peak #  | RetTime [min] | Type | Width [min] | Area [mAU*s] | Height [mAU] | Area %   |
|---------|---------------|------|-------------|--------------|--------------|----------|
| 1       | 64.258        | NM   | 5.5448      | 1.67422e4    | 50.32381     | 49.9678  |
| 2       | 85.180        | NM   | 6.2804      | 2.67638e4    | 44.48713     | 50.0322  |
| Totals: |               |      |             | 3.35060e4    |              | 94.81094 |

Signal 2: MWD1 B, Sig=254.16 Ref=360.100

| Peak #  | RetTime [min] | Type | Width [min] | Area [mAU*s] | Height [mAU] | Area %  |
|---------|---------------|------|-------------|--------------|--------------|---------|
| 1       | 64.333        | NM   | 5.5521      | 6345.03613   | 19.04701     | 49.8239 |
| 2       | 85.130        | NM   | 6.3108      | 6389.88574   | 16.87547     | 50.1761 |
| Totals: |               |      |             | 1.27349e4    |              | 35.9248 |

Signal 3: MWD1 C, Sig=210.8 Ref=360.100

| Peak #  | RetTime [min] | Type | Width [min] | Area [mAU*s] | Height [mAU] | Area %    |
|---------|---------------|------|-------------|--------------|--------------|-----------|
| 1       | 64.320        | NM   | 5.5345      | 3.33916e4    | 100.53446    | 49.9562   |
| 2       | 85.111        | NM   | 6.2597      | 3.3452e4     | 89.66238     | 50.0438   |
| Totals: |               |      |             | 6.68418e4    |              | 100.61584 |

Data File C:\CHEM32\1\DATA\FK\_3\_302\_303\_OJH\DEF\_LC 2011-05-12 20:45:49\050-0201.D  
 Sample Name: FK-3-303

\*\*\*\*\*  
 Acq. Operator : Filip Seq. Line : 2  
 Acq. Instrument : Instrument 2 Location : Vial 50  
 Injection Date : 5/13/2011 2:57:57 AM Inj : 1  
 Inj Volume : 6 ul  
 Acq. Method : C:\Chem32\1\DATA\FK\_3\_302\_303\_OJH\DEF\_LC 2011-05-12 20:45:49\FK-  
 NAFFTYLEBARANO.M  
 Last changed : 5/12/2011 8:00:23 PM by Filip  
 Analysis Method : C:\CHEM32\1\DATA\FK\_3\_302\_303\_OJH\DEF\_LC 2011-05-12 20:45:49\050-0201.D\  
 DA.M (FK-NAFFTYLEBARANO.M)  
 Last changed : 5/13/2011 8:03:20 AM by Filip  
 (modified after loading)  
 Method Info : chiralcol OJ-H

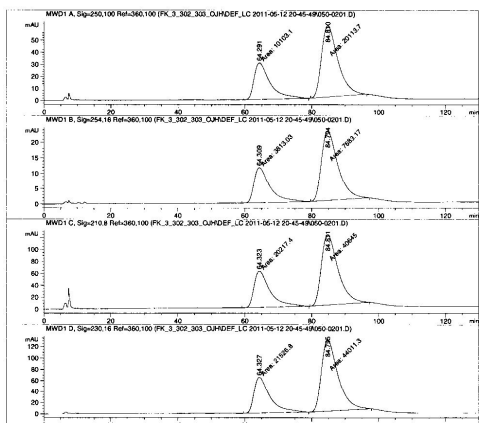

Data File C:\CHEM32\1\DATA\FK\_3\_302\_303\_OJH\DEF\_LC 2011-05-12 20:45:49\050-0201.D  
 Sample Name: FK-3-303

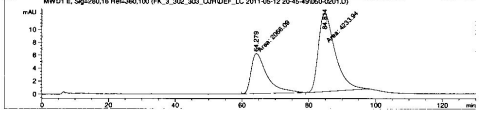

Area Percent Report

Sorted By : Signal  
 Multiplier : 1.0000  
 Dilution : 1.0000  
 Use Multiplier & Dilution Factor with %TMS

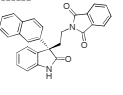

Signal 1: MWD1 A, Sig=250.100 Ref=360.100

| Peak #  | RetTime [min] | Type | Width [min] | Area [mAU*s] | Height [mAU] | Area %  |
|---------|---------------|------|-------------|--------------|--------------|---------|
| 1       | 64.293        | NM   | 5.5758      | 1.01032e4    | 30.99999     | 33.4353 |
| 2       | 84.810        | NM   | 5.6723      | 2.01137e4    | 59.09898     | 66.5647 |
| Totals: |               |      |             | 3.02168e4    |              | 89.2907 |

Signal 2: MWD1 B, Sig=254.16 Ref=360.100

| Peak #  | RetTime [min] | Type | Width [min] | Area [mAU*s] | Height [mAU] | Area %   |
|---------|---------------|------|-------------|--------------|--------------|----------|
| 1       | 64.309        | NM   | 5.5597      | 3813.02808   | 11.43055     | 33.1677  |
| 2       | 84.794        | NM   | 5.7139      | 7683.16748   | 22.41063     | 66.8323  |
| Totals: |               |      |             | 1.14962e4    |              | 33.84138 |

Signal 3: MWD1 C, Sig=210.8 Ref=360.100

| Peak #  | RetTime [min] | Type | Width [min] | Area [mAU*s] | Height [mAU] | Area %    |
|---------|---------------|------|-------------|--------------|--------------|-----------|
| 1       | 64.322        | NM   | 5.5708      | 2.02174e4    | 60.48874     | 33.2282   |
| 2       | 84.811        | NM   | 5.7259      | 4.06450e4    | 118.20669    | 66.7818   |
| Totals: |               |      |             | 6.08625e4    |              | 178.79244 |

0.7 ml/min, 55:45 Hex:EtOH

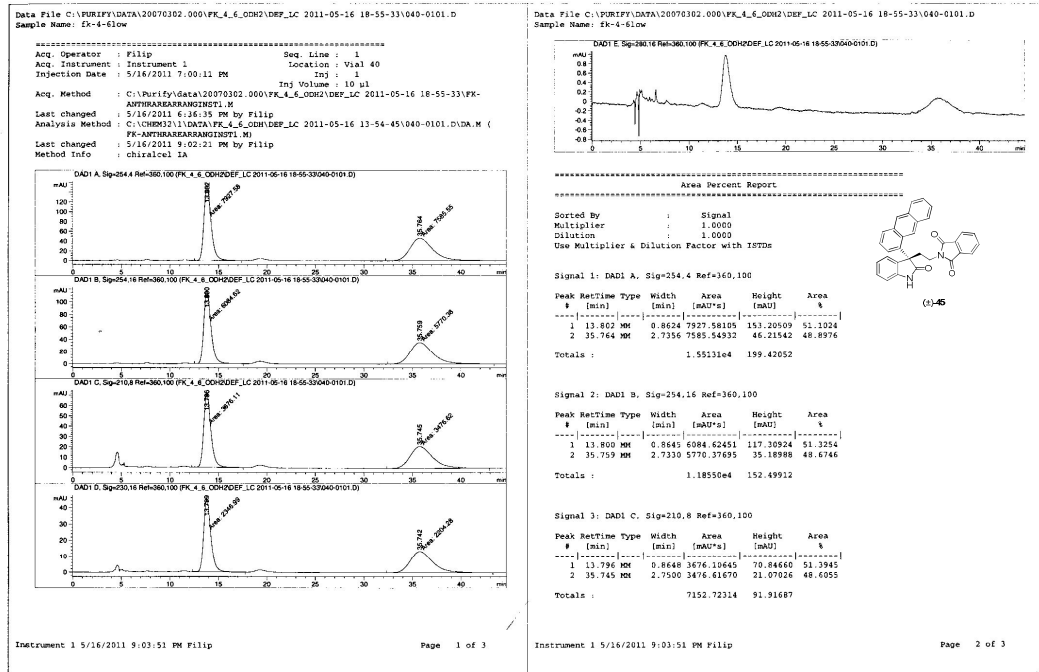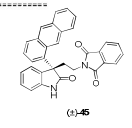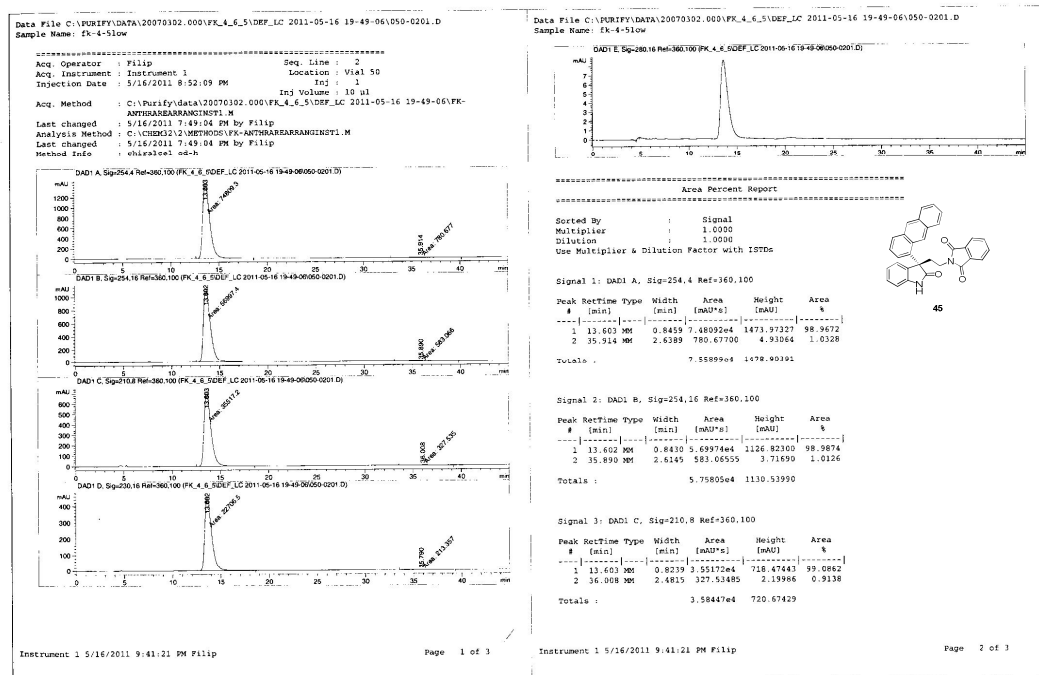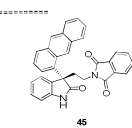

## M. References.

1. Takagi, J.; Sato, K.; Hartwig, J. F.; Ishiyama, T.; Miyaura, N. *Tetrahedron Lett.***2002**, *43*, 5649-5651.
2. Ishiyama, T.; Takagi, J.; Nobuta, Y.; Miyaura, N. *Org. Synth.***2005**, *82*, 126-131.
3. Billingsley, K.; Buchwald, S. L. *J. Am. Chem. Soc.***2007**, *129*, 3358-3366.
4. Movassaghi, M.; Schmidt, M. A.; Ashenurst, J. A. *Org. Lett.***2008**, *10*, 4009-4012.
5. Banik, B. K.; Fernandez, M.; Alvarez, C. *Tet. Lett.* **2005**, *46*, 2479-2482.
6. Larock, R. C.; Yum, E. K.; Refvik, M. D. *J. Org. Chem.***1998**, *63*, 7652-7662.
7. SHELX97: Sheldrick, G.M. (1997).
8. DIRDIF99: Beurskens, P.T., Admiraal, G., Beurskens, G., Bosman, W.P., de Gelder, R., Israel, R. and Smits, J.M.M.(1999). The DIRDIF-99 program system, Technical Report of the Crystallography Laboratory, University of Nijmegen, The Netherlands.
9. Least Squares function minimized: (SHELXL97)

$$\Sigma w(F_o^2 - F_c^2)^2 \quad \text{where } w = \text{Least Squares weights.}$$

10. Standard deviation of an observation of unit weight:

$$[\Sigma w(F_o^2 - F_c^2)^2 / (N_o - N_v)]^{1/2}$$

where  $N_o$  = number of observations

$N_v$  = number of variables

11. Flack, H. D. *Acta Cryst.***1983**, *A39*, 876-881.
12. Cromer, D. T. & Waber, J. T.; "International Tables for X-ray Crystallography", Vol. IV, The Kynoch Press, Birmingham, England, Table 2.2 A (1974).
13. Ibers, J. A.; Hamilton, W. C. *Acta Cryst.* **1964**, *17*, 781.
14. Creagh, D. C. & McAuley, W.J. ; "International Tables for Crystallography", Vol C, (A.J.C. Wilson, ed.), Kluwer Academic Publishers, Boston, Table 4.2.6.8, pages 219-222 (1992).
15. Creagh, D. C. & Hubbell, J.H.; "International Tables for Crystallography", Vol C, (A.J.C. Wilson, ed.), Kluwer Academic Publishers, Boston, Table 4.2.4.3, pages 200-206 (1992).
16. CrystalStructure 3.8: Crystal Structure Analysis Package, Rigaku and Rigaku Americas (2000-2007). 9009 New Trails Dr. The Woodlands TX 77381 USA.
17. SHELX97: Sheldrick, G.M. (1997).
